# Supplementary material
Source: PubMed Central journal article supplement (PMC4394620)
Supplement: NIHMS675172-supplement-Supp_Mat.pdf [file NIHMS675172-supplement-Supp_Mat.pdf]

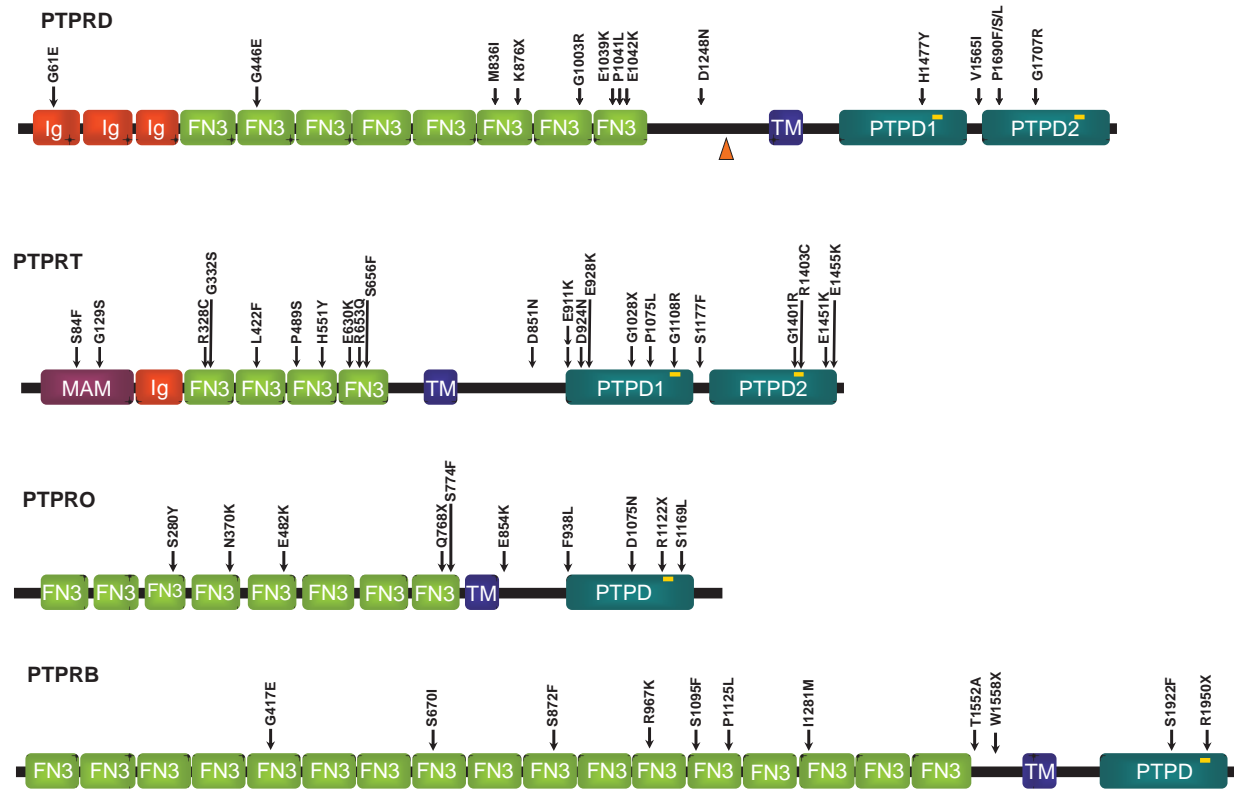

**Supp. Figure S1.** Schematics of mutations identified in *PTPRD*, *PTPRT*, *PTPRB* and *PTPRO*. Black arrow indicates location of somatic mutations. Boxes represent functional domains: MAM, meprin/A5/PTP $\mu$  protein-protein interaction domain; Ig, Ig-like C2-type domain; FN3, fibronectin type III domain; TM, transmembrane (single pass – type I) domain; PTPD1/2, catalytic phosphatase domain D1 (active site indicated in yellow) and D2 (active site indicated in yellow); PTPD, tyrosine-protein phosphatase domain; CS, cleavage site. Amino acid code are \*: Stop, A: Ala, R: Arg, N: Asn, D: Asp, B: Asx, C: Cys, E: Glu, Q: Glu, Z: Glx, G: Gly, H: His, I: Ile, L: Leu, K: Lys, M: Met, F: Phe, P: Pro, S: Ser, T: Thr, W: Trp, Y: Tyr, and V: Val.

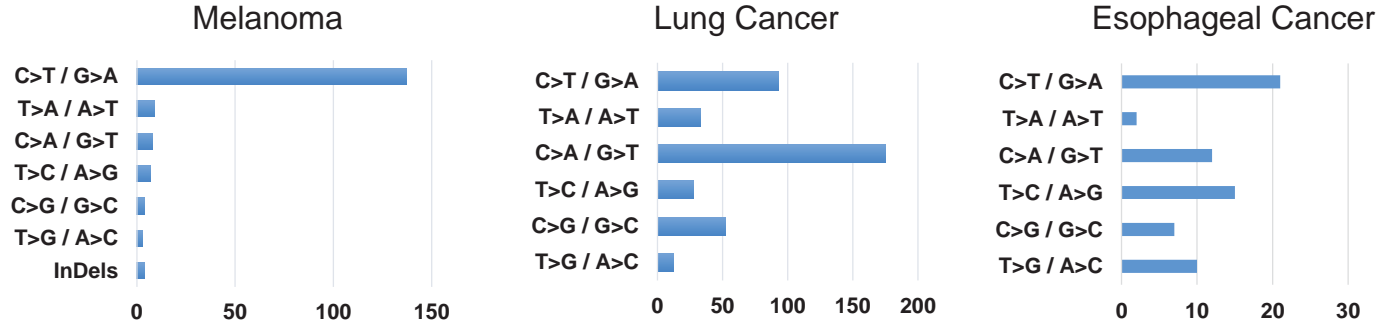

**Supp. Figure S2.** Spectra of single base pair substitutions mutation showed that C>T substitutions are frequent in the melanoma phosphatome. The number of mutation due to six classes of nucleotide substitutions causing nonsynonymous changes in the phosphatome screen is shown. The mutation type causing base pair substitution vs. number of incidence is represented by the histogram. Comparison with combined mutational spectrum of PTPRD, PTPRT, PTPRB, PTPRB and PTPRN2 in lung cancer and esophagus cancer is shown.

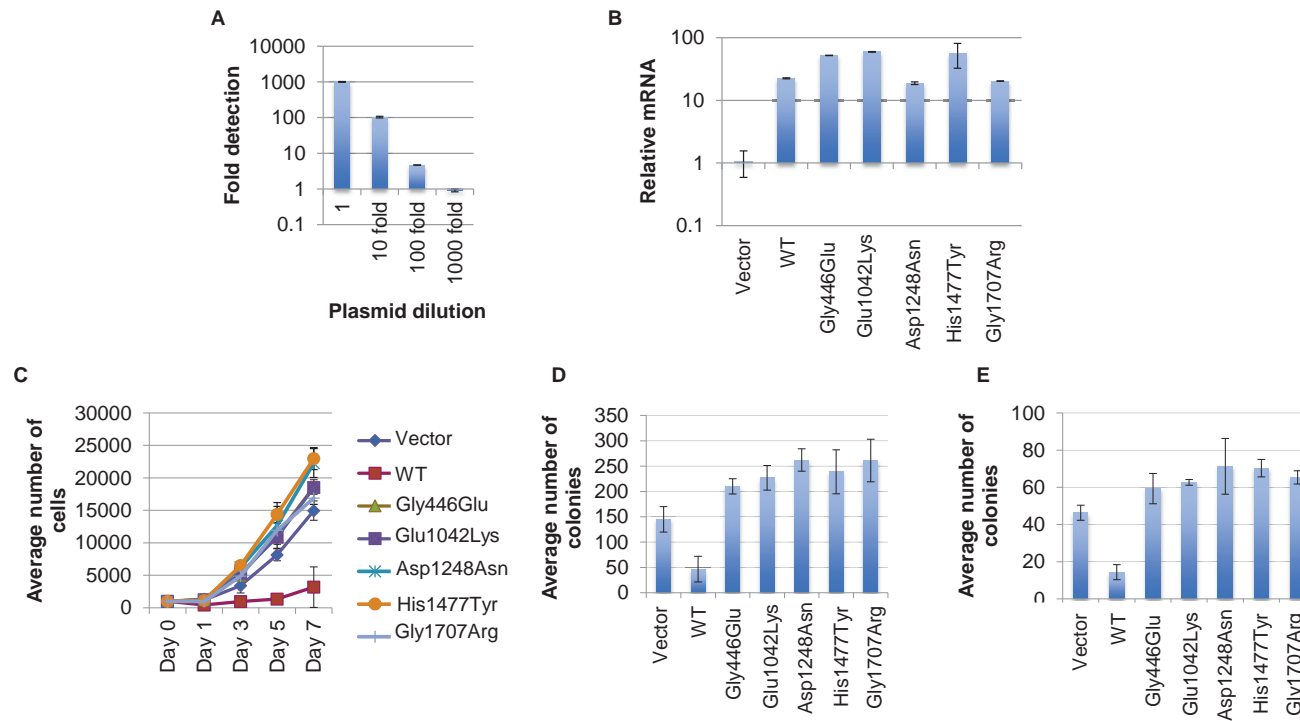

**Supp. Figure S3.** PTPRD mutants expressing Sk-Mel-2 have enhanced anchorage-dependent and -independent growth rate. (a) Validation of the *PTPRD* probe (Hs01551546\_m1) using Taqman analysis on ABI 7500 instrument using *PTPRD* plasmid dilution. (b) Expression of WT *PTPRD* and mutants in Sk-Mel-2 pools as measured by Taqman probe. (c) Cellular proliferation of Sk-Mel-2 pooled clones transduced with an empty vector, WT *PTPRD* and indicated mutants was measured in the presence of 2% serum for 7 days. *PTPRD* mutant cells showed enhanced ability to grow compared with WT *PTPRD* expressing cells. (d) *PTPRD* mutants expressing Sk-Mel-2 have enhanced anchorage-independent growth rate. Anchorage-independent proliferation of Sk-Mel-28 cell clones expressing indicated constructs was analyzed by counting the number of colonies formed in soft agar. Graph indicates average number of colonies (+/-SD) formed after 14 days of growth by 2500 cells in 2% serum. (e) *PTPRD* mutants expressing Sk-Mel-2 have enhanced ability to form foci. Sk-Mel-2 pooled clones expressing the indicated empty vector (control), WT or mutant *PTPRD* constructs seeded at 1000 cells per T25 flask in 2% serum. The graph indicates average number of colonies (+/-SD) formed after 14 days of growth.

|                    |      |                                               |
|--------------------|------|-----------------------------------------------|
| <b>PTP1B/PTPN1</b> | 172  | -LHFHYTTWPDHGVPEESPASFLNFLFKVREFGSLSP         |
| <b>PTPRT human</b> | 1055 | KKGYHEIRELRLFHFTSWPDHGVPCYATGLLGF---VRQVKFLNP |
| <b>PTPRD human</b> | 1502 | KNGSSEKREVRQFQFTAWPDHGVPEHPTPFLAF---LRRVKTCNP |
| <b>PTPRD dog</b>   | 1502 | KNGSSEKREVRQFQFTAWPDHGVPEHPTPFLAF---LRRVKTCNP |
| <b>PTPRD cow</b>   | 1502 | KNGSSEKREVRQFQFTAWPDHGVPEHPTPFLAF---LRRVKTCNP |
| <b>PTPRD mouse</b> | 1417 | KNGSSEKREVRQFQFTAWPDHGVPEHPTPFLAF---LRRVKTCNP |

**(D1521A)**

**Supp. Figure S4.** Sequence conservation of aspartic acid-1521 of human *PTPRD* and its orthologs with *PTP1B* and *PTPRT* for generation of a substrate-trapping mutant. Based on mechanistic studies of *PTP1B* and *PTPRT*, the residue highlighted in red was targeted to generate mutant *PTPRD* for use in substrate trapping immunoprecipitation. Asp1521Ala mutation in *PTPRD* is predicted to be similar to the Asp1071Ala mutation in *PTPRT* and Asp181Ala mutation in *PTP1B*, having higher substrate affinity and impaired phosphatase activity. Accession numbers are *PTPNI* (Homo sapien, NP\_002818.1), *PTPRT* (Homo sapien, NP\_008981.4), *PTPRD* (Homo sapien, NP\_001035802.1), *PTPRD* (Canis lupus, NP\_001035802.1), *PTPRD* (Bos taurus, XP\_538659.2), *PTPRD* (Mus musculus, XP\_002689639.2).

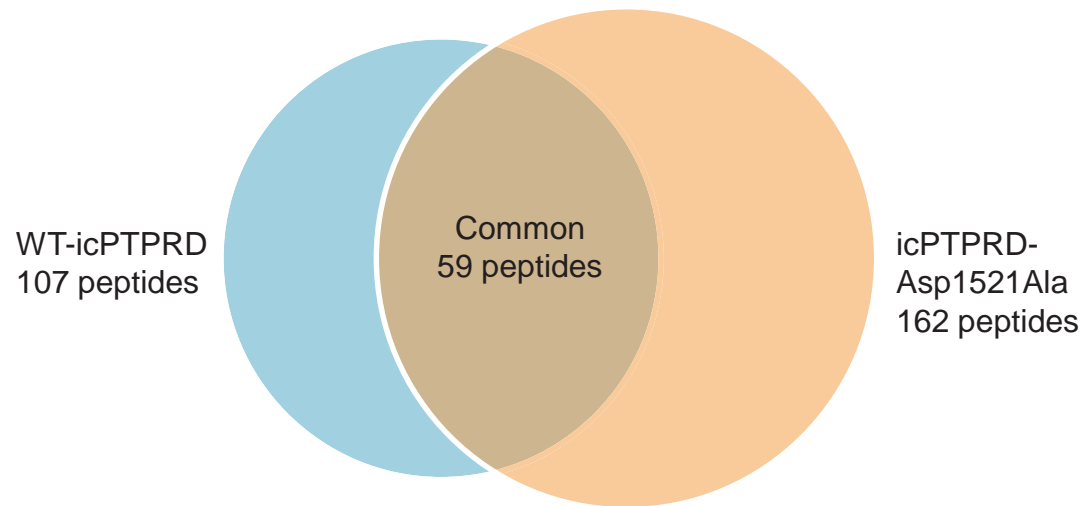

**Supp. Figure S5.** Venn-diagram showing common peptides pulled down by PTPRD. Blue color represents number of peptides in complex with WT icPTPRD, expressing both phosphatase domains of WT PTPRD. Orange color represents number of peptides in complex with icPTPRD-D1215A, expressing both phosphatase domains with Asp1521Ala substrate-trapping mutation in the first phosphatase domain. Merge area represents common peptides pulled down by both. Data normalized to control cell line is shown.

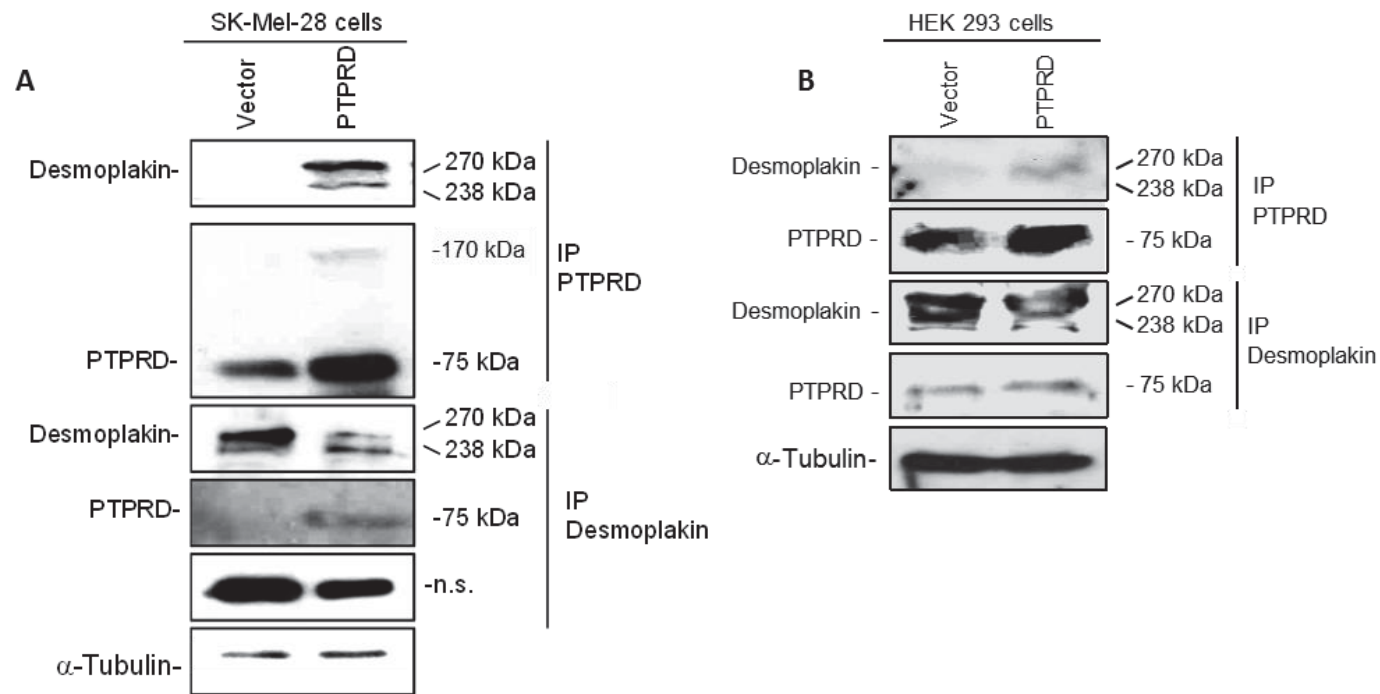

**Supp. Figure S6.** Desmoplakin interacts with overexpressed PTPRD in Sk-Mel-28 cells (a) and HEK 293 cells (b). Immunoblots representing co-immunoprecipitation of desmoplakin and WT PTPRD by PTPRD and desmoplakin antibody. Lysates containing similar amount of total protein was determined by immunoblotting with anti  $\alpha$ -tubulin.

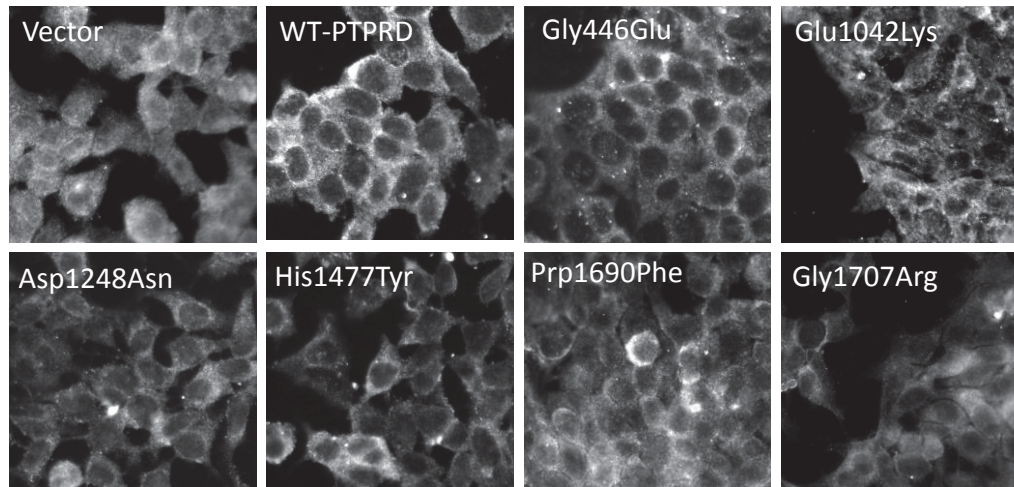

**Supp. Figure S7.** Comparison of desmoplakin expression in WT PTPRD and mutant overexpressing Sk-Mel-28 pooled clones. Immuno-cytochemistry showing inverted images stained with desmoplakin Ab.

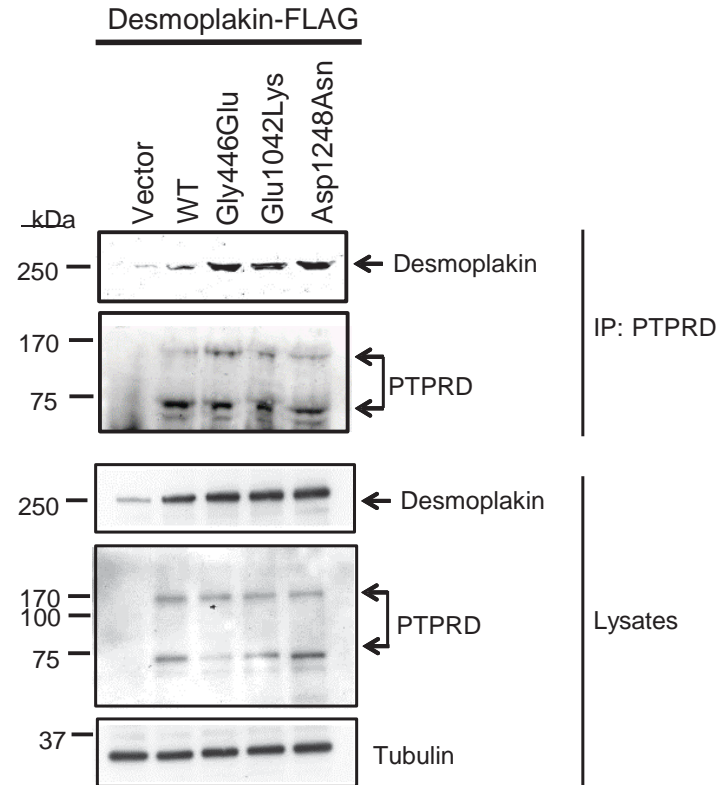

**Supp. Figure S8.** Desmoplakin interacts with WT and mutant PTPRD. PTPRD antibody was used to immunoprecipitate desmoplakin in HEK-293T cells expressing WT and mutant PTPRD. Western blot showing immunoprecipitated samples probed with FLAG antibody and PTPRD antibody. Expression of indicated proteins in whole cell lysates is also shown.



**Supp. Table S1. Somatic mutations identified in PTPs**

| Gene  | Other names                                    | CCDS accession* | Ref Seq accession* | No. of mutations (% tumors affected) # | Tumor | Exon^       | Nucleotide†                                  | Amino Acid‡                                 | Functional domain‡ | NRAS/BRAF mutation** |
|-------|------------------------------------------------|-----------------|--------------------|----------------------------------------|-------|-------------|----------------------------------------------|---------------------------------------------|--------------------|----------------------|
| PTPRT | RTPrho                                         | 42874.1         | NM_133170.3        | 26 (22.5%)                             | 12T   | 3, 18, 31   | c.251C>T, c.2551G>A, c.4207C>T               | p.Ser84Phe, p.Asp851Asn, p.Arg1403Cys       | MAM,N/A,PTPD2      | NRAS                 |
|       | KIAA0283                                       |                 |                    |                                        | 1T    | 3           | c.385G>A                                     | p.Gly129Ser                                 | MAM                | BRAF                 |
|       |                                                |                 |                    |                                        | 45T   | 7           | c.994G>T                                     | p.Gly332Cys (LOH)                           | FN3                | BRAF                 |
|       |                                                |                 |                    |                                        | 52T   | 7,31        | c.982C>T, c.4201G>A                          | p.Arg328Cys, p.Gly1401Arg                   | FN3,PTPD2          | BRAF                 |
|       |                                                |                 |                    |                                        | 83T   | 8,32        | c.1264C>T, c.4351G>A                         | p.Leu422Phe (LOH), p.Glu1451Lys             | N/A,PTPD2          | Both                 |
|       |                                                |                 |                    |                                        | 6T    | 9           | c.1465C>T                                    | p.Pro489Ser                                 | N/A                | BRAF                 |
|       |                                                |                 |                    |                                        | 68T   | 10,31       | c.1651C>T, c.4194-14G>A                      | p.His551Tyr, p.nc                           | FN3,N/A            | BRAF                 |
|       |                                                |                 |                    |                                        | 103T  | 12          | c.1888G>A                                    | p.Glu630Lys (LOH)                           | N/A                | BRAF                 |
|       |                                                |                 |                    |                                        | 21T   | 12          | c.1958G>A                                    | p.Arg653Gln                                 | N/A                | BRAF                 |
|       |                                                |                 |                    |                                        | 5T    | 12          | c.1967C>T                                    | p.Ser656Phe                                 | N/A                | BRAF                 |
|       |                                                |                 |                    |                                        | 104T  | 18          | c.2731G>A                                    | p.Glu911Lys                                 | N/A                | None                 |
|       |                                                |                 |                    |                                        | 20T   | 18          | c.2731G>A                                    | p.Glu911Lys                                 | N/A                | BRAF                 |
|       |                                                |                 |                    |                                        | 39T   | 19,20,23,24 | c.2782G>A, c.2904+9C>T, c.3082G>T, c.3224C>T | p.Glu928Lys, p.nc, p.Gly1028*, p.Pro1075Leu | N/A, PTPD1         | None                 |
|       |                                                |                 |                    |                                        | 44T   | 19          | c.2770G>A                                    | p.Asp924Asn                                 | N/A                | NRAS                 |
|       |                                                |                 |                    |                                        | 80T   | 25          | c.3322G>A                                    | p.Gly1108Arg                                | PTPD1              | BRAF                 |
|       |                                                |                 |                    |                                        | 41T   | 26          | c.3530C>T                                    | p.Ser1177Phe                                | N/A                | BRAF                 |
|       |                                                |                 |                    |                                        | 74T   | 27          | c.3771+11C>T                                 | p.nc                                        | N/A                | NRAS                 |
| 30T   | 32                                             | c.4363G>A       | p.Glu1455Lys       | PTPD2                                  | BRAF  |             |                                              |                                             |                    |                      |
| PTPRD | HPTP                                           | 43786.1         | NM_002839.2        | 17 (18.5%)                             | 34T   | 2           | c.182G>A                                     | p.Gly61Glu                                  | Ig-I set           | BRAF                 |
|       | PTPD                                           |                 |                    |                                        | 13T   | 3,18        | c.211-10C>T, c.3124G>A                       | p.nc, p.Glu1042Lys                          | N/A,N/A            | None                 |
|       | HPTPD                                          |                 |                    |                                        | 16T   | 10          | c.1337G>A                                    | p.Gly446Glu (LOH)                           | FN3                | BRAF                 |
|       | HPTP-delta                                     |                 |                    |                                        | 106T  | 18          | c.3122C>T                                    | p.Pro1041Leu                                | N/A                | N/A                  |
|       | R-PTP-delta                                    |                 |                    |                                        | 12T   | 18          | c.3056-11C>T                                 | p.nc (LOH)                                  | N/A                | NRAS                 |
|       | MGC119750                                      |                 |                    |                                        | 48T   | 18          | c.3115G>A                                    | p.Glu1039Lys (LOH)                          | N/A                | BRAF                 |
|       | MGC119752                                      |                 |                    |                                        | 74T   | 17          | c.2508G>A                                    | p.Met836Ile (LOH)                           | FN3                | NRAS                 |
|       | MGC119753                                      |                 |                    |                                        | 32T   | 17          | c.2626G>T                                    | p.Lys876*                                   | FN3                | BRAF                 |
|       | protein tyrosine phosphatase, receptor type, D |                 |                    |                                        | 71T   | 17          | c.3007G>A                                    | p.G1003Arg                                  | FN3                | BRAF                 |
|       | protein tyrosine phosphatase, receptor type,   |                 |                    |                                        | 21T   | 22          | c.3742G>A                                    | p.Asp1248Asn (LOH)                          | N/A                | BRAF                 |

| Gene   | Other names        | CCDS accession* | Ref Seq accession* | No. of mutations (% tumors affected) # | Tumor | Exon^      | Nucleotide†                                | Amino Acid†                                                      | Functional domain‡ | NRAS/BRAF mutation** |
|--------|--------------------|-----------------|--------------------|----------------------------------------|-------|------------|--------------------------------------------|------------------------------------------------------------------|--------------------|----------------------|
|        | delta polypeptide  |                 |                    |                                        |       |            |                                            |                                                                  |                    |                      |
|        | MGC119751          |                 |                    |                                        | 36T   | 31         | c.5119G>A                                  | p.G1707Arg                                                       | PTPD2              | BRAF                 |
|        | EC 3.1.3.48        |                 |                    |                                        | 52T   | 27         | c.4429C>T                                  | p.His1477Tyr (LOH)                                               | PTPD1              | BRAF                 |
|        |                    |                 |                    |                                        | 86T   | 29         | c.4693G>A                                  | p.Val1565Ile (LOH)                                               | PTPD1              | BRAF                 |
|        |                    |                 |                    |                                        | 6T    | 30         | c.5068C>T, c.5069C>T                       | p.Pro1690Ser (tct),<br>p.Pro1690Leu (ctt),<br>p.Pro1690Phe (ttt) | PTPD2              | NRAS                 |
|        |                    |                 |                    |                                        | 83T   | 28         | c.4661+6_446+7insACAGTTCAGGAATGGT<br>AAGTT | p.nc                                                             | N/A                | Both                 |
| PTPRB  | PTPB               | N/A             | NM_001109754.1     | 19 (16.5%)                             | 21T   | 5          | c.1250G>A                                  | p.G417Glu                                                        | N/A                | BRAF                 |
|        | HPTPB              |                 |                    |                                        | 6T    | 8          | c.1781-5G>A                                | p.nc (LOH)                                                       | N/A                | BRAF                 |
|        | VEPTP              |                 |                    |                                        | 91T   | 8          | c.2009G>A, c.2009T>A                       | p.Ser670Ile,<br>p.Ser670Arg                                      | FN3                | BRAF                 |
|        | HPTP-BETA          |                 |                    |                                        | 39T   | 11, 14, 27 | c.2615C>T, c.3374C>T, c.5765C>T            | p.Ser872Phe,<br>p.Pro1125Leu,<br>p.Ser1922Phe                    | FN3, N/A, N/A      | None                 |
|        | R-PTP-BETA         |                 |                    |                                        | 55T   | 12         | c.2900G>A                                  | p.Arg967Lys                                                      | FN3                | None                 |
|        | FLJ44133           |                 |                    |                                        | 7T    | 13         | c.3284C>T                                  | p.Ser1095Phe                                                     | FN3                | NRAS                 |
|        | MGC59935           |                 |                    |                                        | 58T   | 15, 18     | c.3843A>G, c.4654A>G                       | p.Ile1281Met,<br>p.Thr1552Ala                                    | FN3, FN3           | BRAF                 |
|        | MGC142023          |                 |                    |                                        | 12T   | 17         | c.4169-9T>A                                | p.nc                                                             | N/A                | NRAS                 |
|        | DKFZp686E2262      |                 |                    |                                        | 81T   | 17         | c.4169-10T>C, c.4169-9T>A                  | p.nc, p.nc                                                       | N/A                | BRAF                 |
|        | DKFZp686H1516<br>4 |                 |                    |                                        | 88T   | 17         | c.4169-10T>C, c.4169-9T>A                  | p.nc, p.nc                                                       | N/A                | BRAF                 |
|        |                    |                 |                    |                                        | 16T   | 18         | c.4674G>A                                  | p.Trp1558*                                                       | FN3                | BRAF                 |
|        |                    |                 |                    |                                        | 73T   | 19         | c.4715-5C>T                                | p.nc                                                             | N/A                | BRAF                 |
|        |                    |                 |                    |                                        | 24T   | 28         | c.5848C>T                                  | p.Arg1950*                                                       | PTPc               | NRAS                 |
| PTPRO  | GLEPP1             | 8675.1          | NM_030667.1        | 11 (12.7%)                             | 95T   | 5          | c.839C>A                                   | p.Ser280Tyr                                                      | N/A                | NRAS                 |
|        | PTPU2              |                 |                    |                                        | 9T    | 6          | c.1106-9T>A, c.1110C>G                     | p.nc, p.Asn370Lys                                                | N/A                | BRAF                 |
|        | PTP-U2             |                 |                    |                                        | 85T   | 7          | c.1444G>A                                  | p.Glu482Lys                                                      | FN3                | BRAF                 |
|        | PTP-oc             |                 |                    |                                        | 21T   | 13         | c.2302C>T                                  | p.Gln768*                                                        | FN3                | BRAF                 |
|        |                    |                 |                    |                                        | 13T   | 14         | c.2321C>T                                  | p.Ser774Phe                                                      | FN3                | None                 |
|        |                    |                 |                    |                                        | 12T   | 16         | c.2560G>A                                  | p.Glu854Lys                                                      | N/A                | NRAS                 |
|        |                    |                 |                    |                                        | 24T   | 19         | c.2814T>G                                  | p.Phe938Leu                                                      | N/A                | NRAS                 |
|        |                    |                 |                    |                                        | 39T   | 23         | c.3223G>A                                  | p.Asp1075Asn                                                     | PTPc               | None                 |
|        |                    |                 |                    |                                        | 60T   | 24         | c.3364C>T                                  | p.Arg1122*                                                       | PTPc               | NRAS                 |
|        |                    |                 |                    |                                        | 45T   | 25         | c.3506C>T                                  | p.Ser1169Leu (LOH)                                               | PTPc               | BRAF                 |
| PTPRN2 | IAR                | 5947.1          | NM_002847.3        | 11 (12.7%)                             | 13T   | 2          | c.113-7C>T                                 | p.nc                                                             | N/A                | None                 |
|        | ICAAR              |                 |                    |                                        | 32T   | 3, 14      | c.202G>A, c.2149G>A                        | p.Asp68Asn,<br>p.Glu717Lys                                       | N/A                | BRAF                 |
|        | PTPRP              |                 |                    |                                        | 24T   | 5          | c.536G>A                                   | p.Arg179Lys                                                      | N/A                | NRAS                 |

| Gene   | Other names                | CCDS accession* | Ref Seq accession* | No. of mutations (% tumors affected) # | Tumor | Exon^ | Nucleotide†          | Amino Acid†                      | Functional domain‡ | NRAS/BRAF mutation** |
|--------|----------------------------|-----------------|--------------------|----------------------------------------|-------|-------|----------------------|----------------------------------|--------------------|----------------------|
|        | IA-2beta                   |                 |                    |                                        | 36T   | 5     | c.428G>A             | p.Gly143Asp                      | N/A                | BRAF                 |
|        |                            |                 |                    |                                        | 96T   | 6     | c.770C>T             | p.Pro257Leu (LOH)                | N/A                | None                 |
|        |                            |                 |                    |                                        | 35T   | 7     | c.1063G>A            | p.Ala355Thr                      | N/A                | BRAF                 |
|        |                            |                 |                    |                                        | 63T   | 9     | c.1269G>A            | p.Met423Ile (LOH)                | N/A                | NRAS                 |
|        |                            |                 |                    |                                        | 34T   | 15    | c.2345-7C>T          | p.nc                             | N/A                | BRAF                 |
|        |                            |                 |                    |                                        | 44T   | 15    | c.2276C>T            | p.Pro759Leu                      | N/A                | NRAS                 |
|        |                            |                 |                    |                                        | 39T   | 16    | c.2419-7C>T          | p.nc                             | N/A                | None                 |
| PTPRS  | PTPSIGMA                   | 12140.1         | NM_002850.3        | 9 (10.1%)                              | 31T   | 4     | c.421C>T             | p.Pro141Ser                      | Ig-I set           | None                 |
|        |                            |                 |                    |                                        | 37T   | 4     | c.470C>T             | p.Ala157Val                      | Ig-I set           | BRAF                 |
|        |                            |                 |                    |                                        | 49T   | 3,4   | c.379+1G>T, c.543T>A | p.nc, p.Asn181Lys                | Ig-I set           | BRAF                 |
|        |                            |                 |                    |                                        | 85T   | 9     | c.860C>T             | p.Pro287Leu                      | Ig-I set           | BRAF                 |
|        |                            |                 |                    |                                        | 24T   | 10    | c.1532C>T            | p.Pro511Leu                      | FN3                | NRAS                 |
|        |                            |                 |                    |                                        | 55T   | 26    | c.4165G>A            | p.Asp1389Asn                     | N/A                | None                 |
|        |                            |                 |                    |                                        | 95T   | 29    | c.4531G>A            | p.Glu1511Lys                     | PTPc               | NRAS                 |
|        |                            |                 |                    |                                        | 104T  | 34    | c.5425C>T            | p.Pro1809Ser                     | PTPc               | None                 |
| PTPN13 | PNP1                       | N/A             | NM_080683.2        | 8 (8.9%)                               | 103T  | 7     | c.1196-6C>T          | p.nc                             | N/A                | BRAF                 |
|        | FAP-1                      |                 |                    |                                        | 29T   | 20    | c.3224-7C>T          | p.nc (LOH)                       | N/A                | BRAF                 |
|        | PTP1E                      |                 |                    |                                        | 12T   | 21    | c.3314-7T>G          | p.nc                             | N/A                | NRAS                 |
|        | PTPL1                      |                 |                    |                                        | 104T  | 28    | c.4549C>T            | p.Arg1517*                       | PDZ                | None                 |
|        | PTPLE                      |                 |                    |                                        | 68T   | 28    | c.4559A>G, c.4566A>G | p.Asn1520Ser, p.Ile1522Met (LOH) | PDZ                | BRAF                 |
|        | PTP-BL                     |                 |                    |                                        | 39T   | 31    | c.5246C>T            | p.Ser1749Leu (LOH)               | N/A                | None                 |
|        | PTP-BAS<br>, DKFZp686J1497 |                 |                    |                                        | 17T   | 49    | c.7385A>T            | p.Gln2462Leu                     | PTPc               | NRAS                 |
| PTPRC  | LCA                        | 1397.1          | NM_002838.4        | 7 (8.9%)                               | 73T   | 13    | c.1659+1G>A          | p.nc                             | N/A                | BRAF                 |
|        | LY5                        |                 |                    |                                        | 106T  | 14    | c.1694G>T            | p.Pro563Leu                      | FN3                | N/A                  |
|        | B220                       |                 |                    |                                        | 69T   | 15    | c.1721-9G>T          | p.nc                             | N/A                | BRAF                 |
|        | CD45                       |                 |                    |                                        | 45T   | 17    | c.1972C>T            | p.Gln656*                        | N/A                | BRAF                 |
|        | T200                       |                 |                    |                                        | 68T   | 24    | c.2689C>T            | p.Gln895*                        | PTPD1              | BRAF                 |
|        | CD45R                      |                 |                    |                                        | 23T   | 30    | c.3406G>A            | p.Glu1134Lys                     | PTPD2              | BRAF                 |
|        | GP180                      |                 |                    |                                        | 64T   | 30    | c.3458C>T            | p.Ser1151Phe                     | PTPD2              | BRAF                 |
| PTPRN  | IA2                        | 2440.1          | NM_002846.2        | 8 (8.9%)                               | 21T   | 3     | c.193G>A             | p.Gly65Arg                       | N/A                | BRAF                 |
|        | IA-2                       |                 |                    |                                        | 52T   | 4     | c.361C>T, c.365G>C   | p.Pro121Ser, p.Arg122Pro         | N/A                | BRAF                 |
|        | ICA512                     |                 |                    |                                        | 4T    | 5     | c.427C>T             | p.Gln143*                        | N/A                | BRAF                 |
|        | R-PTP-N                    |                 |                    |                                        | 8T    | 5     | c.604G>A             | p.Glu202Lys                      | N/A                | BRAF                 |

| Gene              | Other names   | CCDS accession* | Ref Seq accession* | No. of mutations (% tumors affected) # | Tumor | Exon^  | Nucleotide†                | Amino Acid†                             | Functional domain‡ | NRAS/BRAF mutation** |
|-------------------|---------------|-----------------|--------------------|----------------------------------------|-------|--------|----------------------------|-----------------------------------------|--------------------|----------------------|
|                   | FLJ16131      |                 |                    |                                        | 96T   | 6      | c.785G>A                   | p.Gly262Glu                             | N/A                | None                 |
|                   | IA-2/PTP      |                 |                    |                                        | 59T   | 9      | c.1286C>T                  | p.Ser429Phe                             | N/A                | BRAF                 |
|                   |               |                 |                    |                                        | 50T   | 15     | c.2192G>A                  | p.Gly731Glu (LOH)                       | N/A                | BRAF                 |
| PTPRH             | SAP1          | 33110.1         | NM_002842.2        | 7 (7.6%)                               | 55T   | 4,8    | c.431G>A, c.1690-9C>T      | p.Gly144Asp, p.nc                       | FN3,N/A            | None                 |
|                   | FLJ39938      |                 |                    |                                        | 71T   | 4      | c.458G>A                   | p.Gly153Glu                             | FN3                | BRAF                 |
|                   | MGC133058     |                 |                    |                                        | 51T   | 6      | c.1094C>T                  | p.Ser365Phe                             | FN3                | BRAF                 |
|                   | MGC133059     |                 |                    |                                        | 39T   | 12     | c.2384+11G>A               | p.nc                                    | N/A                | None                 |
|                   |               |                 |                    |                                        | 34T   | 18     | c.2969C>T                  | p.Pro990Leu                             | PTPc               | BRAF                 |
|                   |               |                 |                    |                                        | 21T   | 20     | c.3220C>T                  | p.Gln1074*                              | PTPc               | BRAF                 |
| MTMR3             | ZFYVE10       | 13871.1         | NM_153050.2        | 5 (6.3%)                               | 74T   | 10     | c.835C>T                   | p.Arg279*                               | MTPc               | NRAS                 |
|                   | FLJ32333      |                 |                    |                                        | 71T   | 11     | c.881C>T                   | p.Ser294Phe                             | MTPc               | BRAF                 |
|                   | KIAA0371      |                 |                    |                                        | 21T   | 14     | c.1330C>T                  | p.Leu444Phe                             | N/A                | BRAF                 |
|                   | FYVE-DSP1     |                 |                    |                                        | 72T   | 15     | c.1548C>A                  | p.Phe516Leu                             | N/A                | None                 |
|                   |               |                 |                    |                                        | 39T   | 20     | c.3455C>T                  | p.Pro1152Leu                            | FYVE-type          | None                 |
| TNS1              | TNS           | 2407.1          | NM_022648.4        | 7 (6.3%)                               | 32T   | 8, 21  | c.666-7C>T, c.4523C>T      | p.nc, p.Pro1508Leu                      | N/A,SH2            | BRAF                 |
|                   | MXRA6         |                 |                    |                                        | 4T    | 15     | c.1729C>T                  | p.Pro577Ser                             | N/A                | BRAF                 |
|                   | MST091        |                 |                    |                                        | 50T   | 12     | c.2362C>T                  | p.Pro788Ser (LOH)                       | N/A                | BRAF                 |
|                   | MST122        |                 |                    |                                        | 18T   | 19     | c.4330+9C>T                | p.nc                                    | N/A                | None                 |
|                   | MST127,       |                 |                    |                                        | 58T   | 15, 21 | c.2919-2921delG ,c.4498G>A | p.Pro921Valfs*12,<br>p.Ala1500Thr (LOH) | N/A,SH2            | BRAF                 |
|                   | MSTP091       |                 |                    |                                        |       |        |                            |                                         |                    |                      |
|                   | MSTP122       |                 |                    |                                        |       |        |                            |                                         |                    |                      |
|                   | MSTP127       |                 |                    |                                        |       |        |                            |                                         |                    |                      |
|                   | MGC88584      |                 |                    |                                        |       |        |                            |                                         |                    |                      |
|                   | DKFZp586K0617 |                 |                    |                                        |       |        |                            |                                         |                    |                      |
| TNS4              | CTEN          | 11368.1         | NM_032865.5        | 8 (6.3%)                               | 106T  | 1      | c.206G>T                   | p.Ala69Val                              | N/A                | N/A                  |
|                   | PP14434       |                 |                    |                                        | 39T   | 2      | c.653C>T, c.683C>T         | p.Ser218Leu,<br>p.Ser228Phe             | N/A                | None                 |
|                   | FLJ14950      |                 |                    |                                        | 32T   | 3, 4   | c.1055C>T, c.1289-10C>T    | p.Pro352Leu, p.nc                       | N/A                | BRAF                 |
|                   |               |                 |                    |                                        | 55T   | 11     | c.1940C>T                  | p.Thr647Ile                             | PTB                | None                 |
|                   |               |                 |                    |                                        | 21T   | 12,12  | c.2141G>A, c.2140-2142delG | p.Arg714Lys (LOH),<br>p.Glu713Cysfs*24  | PTB                | BRAF                 |
| PTPRE             | PTPE          | 7657.1          | NM_006504.4        | 4 (5.1%)                               | 39T   | 9      | c.11G>A                    | p.nc                                    | N/A                | None                 |
|                   | HPTPE         |                 |                    |                                        | 55T   | 1      | c.32G>A                    | p.Gly11Asp                              | N/A                | None                 |
| DKFZp313F131<br>0 | FLJ57799      |                 |                    |                                        | 13T   | 6      | c.598G>A                   | p.Glu200Lys                             | PTPD1              | None                 |



| Gene | Other names                             | CCDS accession* | Ref Seq accession* | No. of mutations (% tumors affected) # | Tumor | Exon^ | Nucleotide† | Amino Acid† | Functional domain‡ | NRAS/BRAF mutation** |
|------|-----------------------------------------|-----------------|--------------------|----------------------------------------|-------|-------|-------------|-------------|--------------------|----------------------|
|      | PTPCAAX1<br>PTP(CAAX1)<br>DKFZp779M0721 |                 |                    |                                        |       |       |             |             |                    |                      |

\*Accession numbers for mutated PTPs in Santa Cruz and GenBank. #Number of non-synonymous and splice site mutations observed and percent of tumors affected for each of the 23 genes in the panel of 79 melanoma cancers.

†Nucleotide and amino acid change resulting from mutation. When multiple mutations in the same gene in a tumor were observed, the mutations are separated by a comma. "\*\*/X" refers to stop codon. "LOH" refers to cases wherein the wild-type allele was lost and only the mutant allele remained. "Splice site" refers to a case wherein the alteration affected 15 bases spanning the exon.

\*\*Mutations previously observed in NRAS, BRAF. "None" refers no mutation observed. "Both" refers to both NRAS and BRAF mutation.

‡ Abbreviations for the functional domains: FERM: Four-point-one, Ezrin, Radixin, Moesin domain; FN3: Fibronectin Type III; FYVE-type: Fab1, YOTB, Vac1, EEA1-type zinc finger domain; Ig: Immunoglobulin domain; IgCam: Immunoglobulin-containing cell adhesion molecules; Ig-like C2-type 1: immunoglobulin-like domain containing two cysteine residues; MAM:Meprin/A5-protein/PTPmu;

MTPc: myotubularin phosphatase domain; PDZ: PSD95, DlgA, zo-1 domain/glycine-leucine-glycine-phenylalanine domain; PTT: phosphatase tensin-type domain; PTPc: protein tyrosine phosphatase domain of PTPs containing single catalytic domains; PTPD1: protein tyrosine phosphatase domain 1 (of PTPs containing two catalytic domains); PTPD2: protein tyrosine phosphatase

domain 2 (of PTPs containing two catalytic domains); SH2: Src homology 2 domain; TM: transmembrane domain; PTB: Phosphotyrosine-binding domain

^Exon number were derived from Ensemble (<http://uswest.ensembl.org/index.html>)

‡Functional domains were derived from Pfam (<http://pfam.sanger.ac.uk/>)

p.nc : protein has not been analysed, an effect is expected but difficult to predict

c. : a coding DNA reference sequenced is used in this analysis.

All the variants have been submitted to the ClinVar database at <http://www.ncbi.nlm.nih.gov/clinvar/>. Accession numbers for ClinVar dataset are listed in Supp. Table S8.

**Supp. Table S2. List of genes sequenced in PTP screen**

| <b>Gene ID</b> | <b>CCDS</b> | <b>Accession</b> | <b>Gene Description</b>                                           |
|----------------|-------------|------------------|-------------------------------------------------------------------|
| MTMR11         | CCDS942.1   | NM_181873        | myotubularin related protein 11                                   |
| PTPDC1         | CCDS6708.1  | NM_152422        | protein tyrosine phosphatase domain containing 1                  |
| PTPRS          | CCDS12139.1 | NM_130853        | protein tyrosine phosphatase, receptor type, S                    |
| PTPN13         | n/a         | NM_080683        | protein tyrosine phosphatase, non-receptor type 13                |
| PTPN6          | CCDS41744.1 | NM_080548        | protein tyrosine phosphatase, non-receptor type 6                 |
| PTP4A2         | CCDS348.1   | NM_080391        | protein tyrosine phosphatase type IVA, member 2                   |
| TNS4           | CCDS11368.1 | NM_032865        | tensin 4                                                          |
| TNS1           | CCDS2407.1  | NM_022648        | tensin 1                                                          |
| MTMR3          | CCDS13870.1 | NM_021090        | myotubularin-related protein 3                                    |
| MTMR8          | CCDS14379.1 | NM_017677        | myotubularin related protein 8                                    |
| MTMR2          | CCDS8305.1  | NM_016156        | myotubularin-related protein 2                                    |
| PTPN23         | CCDS2754.1  | NM_015466        | protein tyrosine phosphatase, non-receptor type 23                |
| MTMR9          | CCDS5979.1  | NM_015458        | myotubularin-related protein 9                                    |
| MTMR15         | CCDS32186.1 | NM_014967        | myotubularin related protein 15                                   |
| PTPN18         | CCDS2161.1  | NM_014369        | protein tyrosine phosphatase, non-receptor type, 18               |
| PTPLA          | CCDS7121.1  | NM_014241        | protein tyrosine phosphatase-like, member A                       |
| PTPN22         | CCDS864.1   | NM_012411        | protein tyrosine phosphatase, non-receptor type 22                |
| PTP4A3         | CCDS6382.1  | NM_007079        | protein tyrosine phosphatase type IVA, member 3                   |
| PTPRT          | CCDS42874.1 | NM_007050        | protein tyrosine phosphatase, receptor type, T                    |
| PTPN21         | CCDS9884.1  | NM_007039        | protein tyrosine phosphatase, non-receptor type 21                |
| PTPRE          | CCDS7657.1  | NM_006504        | protein tyrosine phosphatase, receptor type, E                    |
| PTPRU          | CCDS334.1   | NM_005704        | protein tyrosine phosphatase, receptor type, U                    |
| PTPRCAP        | CCDS8163.1  | NM_005608        | protein tyrosine phosphatase, receptor type, C-associated protein |
| PTPN14         | CCDS1514.1  | NM_005401        | protein tyrosine phosphatase, non-receptor type 14                |
| MTMR4          | CCDS11608.1 | NM_004687        | myotubularin related protein 4                                    |
| MTMR7          | CCDS34851.1 | NM_004686        | myotubularin related protein 7                                    |
| MTMR6          | CCDS9313.1  | NM_004685        | myotubularin related protein 6                                    |
| MTMR1          | CCDS14695.1 | NM_003828        | myotubularin-related protein 1                                    |
| PTP4A1         | CCDS4965.1  | NM_003463        | protein tyrosine phosphatase type IVA, member 1                   |
| PTPRZ1         | CCDS34740.1 | NM_002851        | protein tyrosine phosphatase, receptor-type, Z polypeptide 1      |
| PTPRR          | CCDS8998.1  | NM_002849        | protein tyrosine phosphatase, receptor type, R                    |
| PTPRO          | CCDS8674.1  | NM_002848        | receptor-type protein tyrosine phosphatase O                      |
| PTPRN2         | CCDS5947.1  | NM_002847        | protein tyrosine phosphatase, receptor type, N polypeptide 2      |
| PTPRN          | CCDS2440.1  | NM_002846        | protein tyrosine phosphatase, receptor type, N                    |

| <b>Gene ID</b> | <b>CCDS</b> | <b>Accession</b> | <b>Gene Description</b>                             |
|----------------|-------------|------------------|-----------------------------------------------------|
| PTPRM          | CCDS11840.1 | NM_002845        | protein tyrosine phosphatase, receptor type, M      |
| PTPRK          | CCDS5137.1  | NM_002844        | protein tyrosine phosphatase, receptor type, K      |
| PTPRJ          | CCDS7945.1  | NM_002843        | protein tyrosine phosphatase, receptor type, J      |
| PTPRH          | CCDS33110.1 | NM_002842        | protein tyrosine phosphatase, receptor type, H      |
| PTPRG          | CCDS2895.1  | NM_002841        | protein tyrosine phosphatase, receptor type, G      |
| PTPRF          | CCDS489.2   | NM_002840        | protein tyrosine phosphatase, receptor type, F      |
| PTPRD          | CCDS43786.1 | NM_002839        | protein tyrosine phosphatase, receptor type, D      |
| PTPRC          | CCDS1397.1  | NM_002838        | protein tyrosine phosphatase, receptor type, C      |
| PTPRA          | CCDS13038.1 | NM_002836        | protein tyrosine phosphatase, receptor type, A      |
| PTPN12         | CCDS5592.1  | NM_002835        | protein tyrosine phosphatase, non-receptor type 12  |
| PTPN11         | CCDS9163.1  | NM_002834        | protein tyrosine phosphatase, non-receptor type 11  |
| PTPN9          | CCDS10280.1 | NM_002833        | protein tyrosine phosphatase, non-receptor type 9   |
| PTPN7          | CCDS1423.1  | NM_002832        | protein tyrosine phosphatase, non-receptor type, 7  |
| PTPN4          | CCDS2129.1  | NM_002830        | protein tyrosine phosphatase, non-receptor type 4   |
| PTPN3          | CCDS6776.1  | NM_002829        | protein tyrosine phosphatase, non-receptor type 3   |
| PTPN2          | CCDS11865.1 | NM_002828        | protein tyrosine phosphatase, non-receptor type 2   |
| PTPN1          | CCDS13430.1 | NM_002827        | protein tyrosine phosphatase, non-receptor type 1   |
| PTPRB          | n/a         | NM_001109754     | protein tyrosine phosphatase, receptor type, B      |
| PTPN20A        | CCDS31191.1 | NM_001042387     | protein tyrosine phosphatase, non-receptor type 20A |
| PTPN20B        | CCDS41514.1 | NM_001042357     | protein tyrosine phosphatase, non-receptor type 20B |
| MTMR12         | CCDS34138.1 | NM_001040446     | myotubularin related protein 12                     |
| PTPN5          | CCDS41626.1 | NM_001039970     | protein tyrosine phosphatase, non-receptor type 5   |
| MTM1           | CCDS14694.1 | NM_000252        | myotubularin 1                                      |



**Supp. Table S3. List of PTP sequencing primers**

|    | # of Tumors sequenced | Primer     | Gene   | Exon | CCDS accession | Ref Seq accession | Forward Primer                   | Reverse Primer                 | Sequencing Primer |
|----|-----------------------|------------|--------|------|----------------|-------------------|----------------------------------|--------------------------------|-------------------|
| 1  | 79                    | MTMR12-1   | MTMR12 | 1    | CCDS34138.1    | NM_001040446      | M13-CAGCCGCTAGTGCTGGTG           | GCAATCCCTTCTCGGCTC             | GTA AACGACGGCCAGT |
| 2  | 79                    | MTMR12-2   | MTMR12 | 2    | CCDS34138.1    | NM_001040446      | M13-TTCTGAAAGCATGGCTTAATGTT      | AAGCAGTGAGAACATCCAGGT          | GTA AACGACGGCCAGT |
| 3  | 79                    | MTMR12-3   | MTMR12 | 3    | CCDS34138.1    | NM_001040446      | M13-AAATAGGGCTGGAAAGCCTTTAG      | CCCAAACCTCACAAATGCAG           | GTA AACGACGGCCAGT |
| 4  | 79                    | MTMR12-4   | MTMR12 | 4    | CCDS34138.1    | NM_001040446      | M13-AGGCAAGATGGTCTCGATCTC        | CCAAGTTCAGGTCCAACTCC           | GTA AACGACGGCCAGT |
| 5  | 79                    | MTMR12-5   | MTMR12 | 5    | CCDS34138.1    | NM_001040446      | GCAGCACCTTTCCTCTCATT             | M13-CAACCTTCATGCAACGTAAGC      | GTA AACGACGGCCAGT |
| 6  | 79                    | MTMR12-6   | MTMR12 | 6    | CCDS34138.1    | NM_001040446      | M13-AAGAAGCTTAGACACCTTGACTCTTGTC | AAATGAATCACTCAAGCAAGGG         | GTA AACGACGGCCAGT |
| 7  | 79                    | MTMR12-7   | MTMR12 | 7    | CCDS34138.1    | NM_001040446      | M13-ATGGGCTTAGTGGAGGAAACC        | GACAGCCAATGGGTATGGAG           | GTA AACGACGGCCAGT |
| 8  | 79                    | MTMR12-8   | MTMR12 | 8    | CCDS34138.1    | NM_001040446      | M13-CTGAGCTGGTCTGAACAGGG         | AAGCCAAGGGCTTTCAGTAGG          | GTA AACGACGGCCAGT |
| 9  | 79                    | MTMR12-9   | MTMR12 | 9    | CCDS34138.1    | NM_001040446      | M13-TTTAAATGCTAAGCTTATGTGTCCC    | AAACGACGCAGGTGACACTC           | GTA AACGACGGCCAGT |
| 10 | 79                    | MTMR12-10  | MTMR12 | 10   | CCDS34138.1    | NM_001040446      | M13-CATTTCCACACCCATTGACTG        | AAAGGCACCAACTTTCACCTG          | GTA AACGACGGCCAGT |
| 11 | 79                    | MTMR12-11  | MTMR12 | 11   | CCDS34138.1    | NM_001040446      | GGATTCTGCAGTTGAGTCAGG            | M13-TTGTAAAGCAGGTGGCATGTTT     | GTA AACGACGGCCAGT |
| 12 | 79                    | MTMR12-12  | MTMR12 | 12   | CCDS34138.1    | NM_001040446      | GGGCAGGAATATATCCAGTATC           | M13-GCAAAGGATTCCAAGTTAGG       | GTA AACGACGGCCAGT |
| 13 | 79                    | MTMR12-13  | MTMR12 | 13   | CCDS34138.1    | NM_001040446      | GTTATTGGCCCTTGCCTTTAG            | M13-CTTTGCAAGCAGCAATCCTAC      | GTA AACGACGGCCAGT |
| 14 | 79                    | MTMR12-14  | MTMR12 | 14   | CCDS34138.1    | NM_001040446      | M13-TCAGAAGTGCTTATCCACAGC        | AGTTTGATGTCATCCTCTCG           | GTA AACGACGGCCAGT |
| 15 | 79                    | MTMR12-15  | MTMR12 | 15   | CCDS34138.1    | NM_001040446      | M13-TGCCTGTGTCCAGAAGTATGTG       | TCAACTCTGCAGACTGCTTCG          | GTA AACGACGGCCAGT |
| 16 | 79                    | MTMR12-16a | MTMR12 | 16   | CCDS34138.1    | NM_001040446      | GGCAACACTGATGTCTCTTGG            | M13-GGAGCAGAGCGAAAGGAAAC       | GTA AACGACGGCCAGT |
| 17 | 79                    | MTMR12-16b | MTMR12 | 16   | CCDS34138.1    | NM_001040446      | AGCGCTACCTACGTTGGATT             | M13-GTAGCGTGACACAAATCCAGG      | GTA AACGACGGCCAGT |
| 18 | 79                    | MTMR3-1    | MTMR3  | 1    | CCDS13870.1    | NM_021090.3       | M13-AAGGAAAGAGAGAGCCTTG          | AAGAGACAACATCTAGCTCACAGG       | GTA AACGACGGCCAGT |
| 19 | 79                    | MTMR3-2    | MTMR3  | 2    | CCDS13870.1    | NM_021090.3       | M13-GCCTGTTACCTTGGTCTTTG         | TCATCTTAAACAGTGGATTCTCAGG      | GTA AACGACGGCCAGT |
| 20 | 79                    | MTMR3-3    | MTMR3  | 3    | CCDS13870.1    | NM_021090.3       | TACCATCCATTAGCAACTG              | M13-TCTCCCAATTCTGTATGCCTC      | GTA AACGACGGCCAGT |
| 21 | 79                    | MTMR3-4    | MTMR3  | 4    | CCDS13870.1    | NM_021090.3       | TTGATCCAGATAAGTTTGCAGTTC         | M13-AAATATTTTCAGGCACAACTACTCAG | GTA AACGACGGCCAGT |
| 22 | 79                    | MTMR3-5    | MTMR3  | 5    | CCDS13870.1    | NM_021090.3       | M13-CACTACGAGTGGCATTCTTG         | AGGCCAATAGATTGTGATGC           | GTA AACGACGGCCAGT |
| 23 | 79                    | MTMR3-7    | MTMR3  | 7    | CCDS13870.1    | NM_021090.3       | GCCTTAACTGGTCTGTGGC              | M13-CAGGTTAGCAGCAGCAGAGG       | GTA AACGACGGCCAGT |
| 24 | 79                    | MTMR3-8    | MTMR3  | 8    | CCDS13870.1    | NM_021090.3       | AGGACTTGAAGCTGACCCAAC            | M13-CCCATCAAGTGAAGCTCTGC       | GTA AACGACGGCCAGT |
| 25 | 79                    | MTMR3-9    | MTMR3  | 9    | CCDS13870.1    | NM_021090.3       | TGCTTGTGGGTCTAATTCTGC            | M13-TTGCCACTTATTTCAAATGGG      | GTA AACGACGGCCAGT |
| 26 | 79                    | MTMR3-10   | MTMR3  | 10   | CCDS13870.1    | NM_021090.3       | M13-TTAATCAGAAGCTGCAGTGGG        | CATTCAGACCCAGCAAGGAG           | GTA AACGACGGCCAGT |
| 27 | 79                    | MTMR3-11   | MTMR3  | 11   | CCDS13870.1    | NM_021090.3       | GCCTCATCTGAGACATGC               | M13-TTTAACCGAATCACCCTCC        | GTA AACGACGGCCAGT |
| 28 | 79                    | MTMR3-12   | MTMR3  | 12   | CCDS13870.1    | NM_021090.3       | TTTCTGGGAGGCTGTTAGAGG            | M13-GTTTCATGTGAGAACTGGCCC      | GTA AACGACGGCCAGT |
| 29 | 79                    | MTMR3-13   | MTMR3  | 13   | CCDS13870.1    | NM_021090.3       | CCCCTCTGACAGAGTAAATTG            | M13-GGAACCAAGTCCATCCAGAGAC     | GTA AACGACGGCCAGT |
| 30 | 79                    | MTMR3-14   | MTMR3  | 14   | CCDS13870.1    | NM_021090.3       | M13-TGATCCTCATTCCAGACATCC        | CAACAGGGCCTAACTACTCC           | GTA AACGACGGCCAGT |
| 31 | 79                    | MTMR3-15a  | MTMR3  | 15   | CCDS13870.1    | NM_021090.3       | M13-CTCGCTCCAGAGATGTACAG         | CTCCACTCTCTTTGGTGG             | GTA AACGACGGCCAGT |
| 32 | 79                    | MTMR3-15b  | MTMR3  | 15   | CCDS13870.1    | NM_021090.3       | GTGACAACACAGTGCCTCTGG            | M13-AGAAGTCTTCTCCCTACCC        | GTA AACGACGGCCAGT |
| 33 | 79                    | MTMR3-15c  | MTMR3  | 15   | CCDS13870.1    | NM_021090.3       | CATTGGACTTCACCAAGACCC            | M13-TACATTGGCTAAAGGCAAGG       | GTA AACGACGGCCAGT |
| 34 | 79                    | MTMR3-15d  | MTMR3  | 15   | CCDS13870.1    | NM_021090.3       | AGGGTAGGGAGGAAGCAGTTC            | M13-GTGGTGCAAGTTCCTTGAGTG      | GTA AACGACGGCCAGT |

|    | # of Tumors sequenced | Primer    | Gene  | Exon | CCDS accession | Ref Seq accession | Forward Primer                 | Reverse Primer                  | Sequencing Primer |
|----|-----------------------|-----------|-------|------|----------------|-------------------|--------------------------------|---------------------------------|-------------------|
| 35 | 79                    | MTMR3-15e | MTMR3 | 15   | CCDS13870.1    | NM_021090.3       | AGAGACAAGCCTGGTCGAGAG          | M13-AGCCTACTCACCACCTCATCC       | GTA AACGACGGCCAGT |
| 36 | 79                    | MTMR3-15f | MTMR3 | 15   | CCDS13870.1    | NM_021090.3       | TAGCACCTCCAGATGTACCC           | M13-CCTGTACCAATCACCATGCAC       | GTA AACGACGGCCAGT |
| 37 | 79                    | MTMR3-16  | MTMR3 | 16   | CCDS13870.1    | NM_021090.3       | M13-ACCTGTGTATCCCTCTCCCAG      | GGTCCCAGGAGCTAAGGTG             | GTA AACGACGGCCAGT |
| 38 | 79                    | MTMR3-17a | MTMR3 | 17   | CCDS13870.1    | NM_021090.3       | M13-TGGTCCTTGTGACTCTTGCTG      | TGCA AACCAATTCAGAGG             | GTA AACGACGGCCAGT |
| 39 | 79                    | MTMR3-17b | MTMR3 | 17   | CCDS13870.1    | NM_021090.3       | M13-TCTGAATCATGCCATAGCTCAC     | CCCAGGCTTACCCTAGTAAG            | GTA AACGACGGCCAGT |
| 40 | 79                    | MTMR3-18  | MTMR3 | 18   | CCDS13870.1    | NM_021090.3       | M13-GCTCCAGCACATGCA AATTAC     | TGGTGCATCCCAATCTGTC             | GTA AACGACGGCCAGT |
| 41 | 79                    | MTMR6-1   | MTMR6 | 1    | CCDS9313.1     | NM_004685         | GGGAAGTGT TTTCTAGGAGACGG       | M13-CCAAGATGCTGAAAGTGGGAC       | GTA AACGACGGCCAGT |
| 42 | 79                    | MTMR6-2   | MTMR6 | 2    | CCDS9313.1     | NM_004685         | CCTGTTTCTGTACTCCCTCAA          | M13-GGCAGGAGTGATCTGGAGAC        | GTA AACGACGGCCAGT |
| 43 | 79                    | MTMR6-3   | MTMR6 | 3    | CCDS9313.1     | NM_004685         | AACGTGAAGTTTGAGTGAGTATGTAAC    | M13-TTCTAATTACTTTTCAGGCCAATATG  | GTA AACGACGGCCAGT |
| 44 | 79                    | MTMR6-4   | MTMR6 | 4    | CCDS9313.1     | NM_004685         | M13-TCAATGTATTACAGGTATTAGCCATC | CACAGACA AACTTGCTACGCTG         | GTA AACGACGGCCAGT |
| 45 | 79                    | MTMR6-5   | MTMR6 | 5    | CCDS9313.1     | NM_004685         | M13-TCAGCGTAGCAAGTTGTCTGTG     | AACTGCTTGAACCGAGAGGTG           | GTA AACGACGGCCAGT |
| 46 | 79                    | MTMR6-6   | MTMR6 | 6    | CCDS9313.1     | NM_004685         | TTTCTTCATCAA AACTAGATAAGGAGGT  | M13-AAGGATTGATTTCTTAGTATCATTAGC | GTA AACGACGGCCAGT |
| 47 | 79                    | MTMR6-7   | MTMR6 | 7    | CCDS9313.1     | NM_004685         | M13-TTCCTTTAAACTGCCTCCTAGC     | AATACATGCCTGATTTCTAAGAGTTG      | GTA AACGACGGCCAGT |
| 48 | 79                    | MTMR6-8   | MTMR6 | 8    | CCDS9313.1     | NM_004685         | TTTGTAAGCAGGGAAATAGAAA         | M13-TTATCTGATGAATAGATACCAGCCC   | GTA AACGACGGCCAGT |
| 49 | 79                    | MTMR6-9   | MTMR6 | 9    | CCDS9313.1     | NM_004685         | TCATTGCAGGCATAGCACTTC          | M13-GATGCCAGTCTCATCTTTCC        | GTA AACGACGGCCAGT |
| 50 | 79                    | MTMR6-10  | MTMR6 | 10   | CCDS9313.1     | NM_004685         | M13-AACGGAAATAATTTAAGTCACGAAAC | CACTCTTACCTCCCATCACGC           | GTA AACGACGGCCAGT |
| 51 | 79                    | MTMR6-11  | MTMR6 | 11   | CCDS9313.1     | NM_004685         | TGCTAATGTAACAGTGCTTTAGGAA      | M13-GAAGGGTACTCAGCTTTAGAAATACAA | GTA AACGACGGCCAGT |
| 52 | 79                    | MTMR6-12  | MTMR6 | 12   | CCDS9313.1     | NM_004685         | M13-TCTGAGACAAGTTAGACTGTGAATAC | GCCTAGGATGCAGTGTTTCG            | GTA AACGACGGCCAGT |
| 53 | 79                    | MTMR6-13  | MTMR6 | 13   | CCDS9313.1     | NM_004685         | GTTCCGAATCTCACAGATTACAG        | M13-TCAATCAAAGTAGGGATGACCTG     | GTA AACGACGGCCAGT |
| 54 | 79                    | MTMR6-14  | MTMR6 | 14   | CCDS9313.1     | NM_004685         | ACCATGTCATATGCATTAATGTTTC      | M13-TGGTTATGCTTACAGACCATCCTC    | GTA AACGACGGCCAGT |
| 55 | 79                    | MTMR8-1   | MTMR8 | 1    | CCDS14379.1    | NM_017677         | M13-GACGAGAGTTTGAGCCAGGAC      | AGAGGTGTTTGGTTGAAAGGG           | GTA AACGACGGCCAGT |
| 56 | 79                    | MTMR8-2   | MTMR8 | 2    | CCDS14379.1    | NM_017677         | M13-TTATCTTGCTTTGAATGGCCC      | TGATGACCAGAGCCAATAACTTG         | GTA AACGACGGCCAGT |
| 57 | 79                    | MTMR8-3   | MTMR8 | 3    | CCDS14379.1    | NM_017677         | M13-GGTCATGCTGTACCATTACGG      | GCCCTGATCTTCCATTATGC            | GTA AACGACGGCCAGT |
| 58 | 79                    | MTMR8-4   | MTMR8 | 4    | CCDS14379.1    | NM_017677         | M13-GCCTTTATTTGCATTGTTGATG     | GAATGGCTGAATGTTGAATGG           | GTA AACGACGGCCAGT |
| 59 | 79                    | MTMR8-5   | MTMR8 | 5    | CCDS14379.1    | NM_017677         | GCAGACAGGTAGAGGAGGAGG          | M13-GCTACTAAGTGGCAGCATGAAAC     | GTA AACGACGGCCAGT |
| 60 | 79                    | MTMR8-6   | MTMR8 | 6    | CCDS14379.1    | NM_017677         | CCTCTACTCATGGAACCTGGC          | M13-TCACACTGAGGTGGGAAAGAC       | GTA AACGACGGCCAGT |
| 61 | 79                    | MTMR8-7   | MTMR8 | 7    | CCDS14379.1    | NM_017677         | M13-GGTTCAGAATGAGGCATTGAG      | GACTCTGCTCACCTGCTTGC            | GTA AACGACGGCCAGT |
| 62 | 79                    | MTMR8-8   | MTMR8 | 8    | CCDS14379.1    | NM_017677         | M13-CATTTAACCTTTCTGCCTCAGC     | CTTTCACCATGGCACACTAC            | GTA AACGACGGCCAGT |
| 63 | 79                    | MTMR8-9   | MTMR8 | 9    | CCDS14379.1    | NM_017677         | M13-TGCTTTAGGGACAGTATTGGC      | GACAGTCATCCATTAAGCTCTGC         | GTA AACGACGGCCAGT |
| 64 | 79                    | MTMR8-10  | MTMR8 | 10   | CCDS14379.1    | NM_017677         | ATCTGAAATTTGAAGGCACCC          | M13-TGCCATGTTCAACTTCTCTTTC      | GTA AACGACGGCCAGT |
| 65 | 79                    | MTMR8-11  | MTMR8 | 11   | CCDS14379.1    | NM_017677         | CCTTGCCACTACCAACAGAGAC         | M13-ATGCCAAATTCAGGGTGGTAG       | GTA AACGACGGCCAGT |
| 66 | 79                    | MTMR8-12  | MTMR8 | 12   | CCDS14379.1    | NM_017677         | TGCTGCTTATCAGTTCAACAGG         | M13-TACAGATGGTGGCAGCTATCC       | GTA AACGACGGCCAGT |
| 67 | 79                    | MTMR8-13  | MTMR8 | 13   | CCDS14379.1    | NM_017677         | M13-CCCAATATGAGCATGTCCAG       | CAATTCAACTCCAAGCAGGC            | GTA AACGACGGCCAGT |
| 68 | 79                    | MTMR8-14a | MTMR8 | 14   | CCDS14379.1    | NM_017677         | M13-ATGAGGGAAGATGTTGTGGG       | AAGTTTCAGAGATGCCAGTG            | GTA AACGACGGCCAGT |
| 69 | 79                    | MTMR8-14b | MTMR8 | 14   | CCDS14379.1    | NM_017677         | TGACCAATCCTCTTGGCTTT           | M13-CATAGCCCTCTCTGGGACAA        | GTA AACGACGGCCAGT |
| 70 | 79                    | MTMR8-15a | MTMR8 | 15   | CCDS14379.1    | NM_017677         | CTGCAGCCAAGCAGAGTAT            | M13-GGCCCCACAGATTCCTAAGT        | GTA AACGACGGCCAGT |

|     | # of Tumors sequenced | Primer     | Gene   | Exon | CCDS accession | Ref Seq accession | Forward Primer                   | Reverse Primer                 | Sequencing Primer |
|-----|-----------------------|------------|--------|------|----------------|-------------------|----------------------------------|--------------------------------|-------------------|
| 71  | 79                    | MTMR8-15b  | MTMR8  | 15   | CCDS14379.1    | NM_017677         | GAGAATGGCACCCCTATCCAG            | M13-GGCTTCACCCACTTAAACCA       | GTA AACGACGGCCAGT |
| 72  | 79                    | PTP4A1-1   | PTP4A1 | 1    | CCDS4965.1     | NM_003463         | GATTGAAGAATTGCTGCTTCTTG          | M13-TTCTGGGAAGCTGGAATTGTAGG    | GTA AACGACGGCCAGT |
| 73  | 79                    | PTP4A1-2   | PTP4A1 | 2    | CCDS4965.1     | NM_003463         | TGATCTTCTGTTAACCCAGCATACTT       | M13-TTTCACAACCTCAAATCCTTGC     | GTA AACGACGGCCAGT |
| 74  | 79                    | PTP4A1-3   | PTP4A1 | 3    | CCDS4965.1     | NM_003463         | M13-TCACATTTGGTAGACAACAGGG       | TCAGAAGTATTATCTACCACCTTCC      | GTA AACGACGGCCAGT |
| 75  | 79                    | PTP4A1-4   | PTP4A1 | 4    | CCDS4965.1     | NM_003463         | M13-AGGGTGGTAGATAAATACTTCTGAGTTG | AGAATGTAAGATCTTGATTCCTGG       | GTA AACGACGGCCAGT |
| 76  | 79                    | PTP4A1-5   | PTP4A1 | 5    | CCDS4965.1     | NM_003463         | CCACAAGAGAGGTGATGGTTG            | M13-TCTGTCTAGCTTGAGGCCTGG      | GTA AACGACGGCCAGT |
| 77  | 79                    | PTPN12-1   | PTPN12 | 1    | CCDS5592.1     | NM_002835         | GCTCCTGGAAGTTGTGGTGTC            | M13-AGGTACACAAGCACTGGCG        | GTA AACGACGGCCAGT |
| 78  | 79                    | PTPN12-2   | PTPN12 | 2    | CCDS5592.1     | NM_002835         | AAATGAGTTGTGAGGAATTGGG           | M13-CTACTTCTTAAACAGTGAAACTCAGG | GTA AACGACGGCCAGT |
| 79  | 79                    | PTPN12-3   | PTPN12 | 3    | CCDS5592.1     | NM_002835         | AATTACCCTGCTGGTACCTAGAGTC        | M13-GCTGTTGGTATCATGTTTGAGC     | GTA AACGACGGCCAGT |
| 80  | 79                    | PTPN12-4   | PTPN12 | 4    | CCDS5592.1     | NM_002835         | M13-GAAAGACACATTATTTGGAAATGG     | GGACAAGATTTAAATTATTATCACACC    | GTA AACGACGGCCAGT |
| 81  | 79                    | PTPN12-5   | PTPN12 | 5    | CCDS5592.1     | NM_002835         | M13-AGCCAATTATACTTCTCGGTGC       | GTTTGAATTGCGCTATTGTGG          | GTA AACGACGGCCAGT |
| 82  | 79                    | PTPN12-6   | PTPN12 | 6    | CCDS5592.1     | NM_002835         | CTCCATGCCTGCTAATGTGG             | M13-TCCTTGGCGTCTATAAGCCTG      | GTA AACGACGGCCAGT |
| 83  | 79                    | PTPN12-7   | PTPN12 | 7    | CCDS5592.1     | NM_002835         | GCATGTCTATCACTTCAAACATTTT        | M13-GATTACAGGCATGAGCCACTG      | GTA AACGACGGCCAGT |
| 84  | 79                    | PTPN12-8   | PTPN12 | 8    | CCDS5592.1     | NM_002835         | M13-GGCAGTTTAAATGAGCTGTGC        | TACAAGGCCCTAGTCCCAAAC          | GTA AACGACGGCCAGT |
| 85  | 79                    | PTPN12-9   | PTPN12 | 9    | CCDS5592.1     | NM_002835         | M13-CAGATGTTGCCATGAACACAC        | CGGCCTTCACTACCTTTATTTT         | GTA AACGACGGCCAGT |
| 86  | 79                    | PTPN12-10  | PTPN12 | 10   | CCDS5592.1     | NM_002835         | M13-GTGCCAAGCAGAGTGTCTGAG        | TGGGCAATAGCTCTATGAACAAG        | GTA AACGACGGCCAGT |
| 87  | 79                    | PTPN12-11  | PTPN12 | 11   | CCDS5592.1     | NM_002835         | M13-AAACAAAGGTATAGTTGTTTGTCC     | AAATGTTAAGTGTCTGGATATTCTTC     | GTA AACGACGGCCAGT |
| 88  | 79                    | PTPN12-12  | PTPN12 | 12   | CCDS5592.1     | NM_002835         | TTGAAGTCTGGTCTTCAGGC             | M13-CAATTGATGGTAGTATCCACATTCTG | GTA AACGACGGCCAGT |
| 89  | 79                    | PTPN12-13a | PTPN12 | 13   | CCDS5592.1     | NM_002835         | TTCGCAACCAGATTGTAATGG            | M13-TGTTACACTGCAGTCCACACAAG    | GTA AACGACGGCCAGT |
| 90  | 79                    | PTPN12-13b | PTPN12 | 13   | CCDS5592.1     | NM_002835         | TGAGATTAAGAAGGTCCTCTCC           | M13-TTGCCTTCAGATAAATCAGGTATG   | GTA AACGACGGCCAGT |
| 91  | 79                    | PTPN12-13c | PTPN12 | 13   | CCDS5592.1     | NM_002835         | M13-AAATGTCGGTGATACTTCCAG        | AGCACCTGAATGTGTTGTTCC          | GTA AACGACGGCCAGT |
| 92  | 79                    | PTPN12-14  | PTPN12 | 14   | CCDS5592.1     | NM_002835         | M13-AAACTGATCTAGATATTTGTGACAGGAA | CACCATGCCAGCCTATAAT            | GTA AACGACGGCCAGT |
| 93  | 79                    | PTPN12-15  | PTPN12 | 15   | CCDS5592.1     | NM_002835         | M13-TTCAGAAATATGCTTACCAGAAA      | TCTTAGTATAAGAAATGCCATCAAAA     | GTA AACGACGGCCAGT |
| 94  | 79                    | PTPN12-16  | PTPN12 | 16   | CCDS5592.1     | NM_002835         | M13-CCCATAACAGACCAGCTTTC         | AAATCTCTTCCATTAGCCTGT          | GTA AACGACGGCCAGT |
| 95  | 79                    | PTPN12-17  | PTPN12 | 17   | CCDS5592.1     | NM_002835         | TTCTGTGTGACCACAATAACCTG          | M13-TGACTAGTCCAAGCACTTTGG      | GTA AACGACGGCCAGT |
| 96  | 79                    | PTPN12-18  | PTPN12 | 18   | CCDS5592.1     | NM_002835         | M13-AATGAGAATGTCTGTGGACATGG      | GTATAAGGCAGGTAGATGGTCCC        | GTA AACGACGGCCAGT |
| 97  | 79                    | PTPN13-1   | PTPN13 | 1    | n/a            | NM_080683.2       | M13-TTCCCTCCAATTCCTTTACC         | TTCATACTCTGCCAAAGGCAC          | GTA AACGACGGCCAGT |
| 98  | 79                    | PTPN13-2   | PTPN13 | 2    | n/a            | NM_080683.2       | M13-GCATTATCCATTGAAGTGATTGC      | TTGAAACATGGTAGCCCATG           | GTA AACGACGGCCAGT |
| 99  | 79                    | PTPN13-3   | PTPN13 | 3    | n/a            | NM_080683.2       | M13-TATGCATAAAGGATGGGCTGG        | CGTATAAACGTGTGGAAGACTATG       | GTA AACGACGGCCAGT |
| 100 | 79                    | PTPN13-4   | PTPN13 | 4    | n/a            | NM_080683.2       | TGTGGTTCTGTGATTCCTAGA            | M13-TCAGCTCAAACATGCTATCATTC    | GTA AACGACGGCCAGT |
| 101 | 79                    | PTPN13-5   | PTPN13 | 5    | n/a            | NM_080683.2       | TCTGAAATGAATTGGCCAGC             | M13-TTACCAGATTTCAAAGCCAGG      | GTA AACGACGGCCAGT |
| 102 | 79                    | PTPN13-6a  | PTPN13 | 6    | n/a            | NM_080683.2       | CATCCATCCCATTTCCACC              | M13-TGAGGGCCAAGATATCCAAG       | GTA AACGACGGCCAGT |
| 103 | 79                    | PTPN13-6b  | PTPN13 | 6    | n/a            | NM_080683.2       | M13-AAGAAGATCTGGGCTTCATCC        | TTCTACATTCATGGCTTCCCTC         | GTA AACGACGGCCAGT |
| 104 | 79                    | PTPN13-6c  | PTPN13 | 6    | n/a            | NM_080683.2       | TTCATCCATGGACTTCTTTG             | M13-TGGAAGGGAGAACAGAAATTG      | GTA AACGACGGCCAGT |
| 105 | 79                    | PTPN13-7   | PTPN13 | 7    | n/a            | NM_080683.2       | M13-AAACCCATTATTGGAACGCAT        | CTACATCGTTATTGGAAGAACTGCT      | GTA AACGACGGCCAGT |
| 106 | 79                    | PTPN13-8   | PTPN13 | 8    | n/a            | NM_080683.2       | M13-GCAGTTTCTTCAAATAACGATGTAGTC  | AAAGAATTGCGTGAACCTGG           | GTA AACGACGGCCAGT |
| 107 | 79                    | PTPN13-9   | PTPN13 | 9    | n/a            | NM_080683.2       | AAATGAAATTTGCTTGATTAGCCTT        | M13-CCAGTGAAATGAATATGGGA       | GTA AACGACGGCCAGT |

|     | # of Tumors sequenced | Primer     | Gene   | Exon | CCDS accession | Ref Seq accession | Forward Primer                 | Reverse Primer                 | Sequencing Primer |
|-----|-----------------------|------------|--------|------|----------------|-------------------|--------------------------------|--------------------------------|-------------------|
| 108 | 79                    | PTPN13-10  | PTPN13 | 10   | n/a            | NM_080683.2       | TCCATTCTGTATTGGTAAATTC         | M13-TCGGTTATCCTCATTCTTCCC      | GTA AACGACGGCCAGT |
| 109 | 79                    | PTPN13-11  | PTPN13 | 11   | n/a            | NM_080683.2       | ATATCTTTGGATTTGCCACGG          | M13-GAGGTCAGGCATGGAACAAAC      | GTA AACGACGGCCAGT |
| 110 | 79                    | PTPN13-12  | PTPN13 | 12   | n/a            | NM_080683.2       | GAGTGTCTCAGAGCTCCCTGC          | M13-AAAGCAGACATTATCATTGATTGGA  | GTA AACGACGGCCAGT |
| 111 | 79                    | PTPN13-13  | PTPN13 | 13   | n/a            | NM_080683.2       | CATGGAATTAACCTTACATGCCT        | M13-AGGAACCAAGAAGCCTCAAA       | GTA AACGACGGCCAGT |
| 112 | 79                    | PTPN13-14  | PTPN13 | 14   | n/a            | NM_080683.2       | CTTCATCTTAGCCAAAGCAAG          | M13-GGGTTCAAATCATATCTGCC       | GTA AACGACGGCCAGT |
| 113 | 79                    | PTPN13-15  | PTPN13 | 15   | n/a            | NM_080683.2       | M13-CGGCCAAACCATATCATA CAG     | CACTGAATGGCAGAGCTAAGG          | GTA AACGACGGCCAGT |
| 114 | 79                    | PTPN13-16  | PTPN13 | 16   | n/a            | NM_080683.2       | M13-AAGTCAATATCCAGTGCCTAAACAAG | CATGAAATTGAAATATTGGCTTCAC      | GTA AACGACGGCCAGT |
| 115 | 79                    | PTPN13-17a | PTPN13 | 17   | n/a            | NM_080683.2       | M13-GTGACTGAGCAATTAACACACTTTG  | AGACCAGAAGTGAGCTGGCAC          | GTA AACGACGGCCAGT |
| 116 | 79                    | PTPN13-17b | PTPN13 | 17   | n/a            | NM_080683.2       | M13-ACCCTGATTGCCACACTTTG       | TCACTCCTGCCAAAGATTCTG          | GTA AACGACGGCCAGT |
| 117 | 79                    | PTPN13-17c | PTPN13 | 17   | n/a            | NM_080683.2       | AATATGGGACGAGCAATCAGC          | M13-CGCAACAGACTTTGAACTGAAG     | GTA AACGACGGCCAGT |
| 118 | 79                    | PTPN13-18  | PTPN13 | 18   | n/a            | NM_080683.2       | M13-TGTGTTTCAGGCAGGCTAATC      | CACAGATATCAACGGTCTCCTG         | GTA AACGACGGCCAGT |
| 119 | 79                    | PTPN13-18  | PTPN13 | 18   | n/a            | NM_080683.2       | CTGATCAGAAATCTTTGGCAG          | M13-TGGCAATTAGGACATGGAACC      | GTA AACGACGGCCAGT |
| 120 | 79                    | PTPN13-19a | PTPN13 | 19   | n/a            | NM_080683.2       | M13-CTGAGGACCAGCTGACTTG        | AAGATGGAACACATTAAGTAATCACAG    | GTA AACGACGGCCAGT |
| 121 | 79                    | PTPN13-19b | PTPN13 | 19   | n/a            | NM_080683.2       | M13-AAATGCCATTTGGAGGATG        | GGAACCAAGACTCTTCATTGTTAGG      | GTA AACGACGGCCAGT |
| 122 | 79                    | PTPN13-20a | PTPN13 | 20   | n/a            | NM_080683.2       | GAGAAGCCTGGTTGAAATGG           | M13-TGAAAGTCTTTCTCGGTGG        | GTA AACGACGGCCAGT |
| 123 | 79                    | PTPN13-20b | PTPN13 | 20   | n/a            | NM_080683.2       | CATCTCGGAGAACTCCTTTGG          | M13-GCAAGTTTGCAAAGTCATAGCC     | GTA AACGACGGCCAGT |
| 124 | 79                    | PTPN13-21  | PTPN13 | 21   | n/a            | NM_080683.2       | AGCTTTGTCTGGGCTAGGTT           | M13-TGGAGGTATTTGATGTGCCCT      | GTA AACGACGGCCAGT |
| 125 | 79                    | PTPN13-22  | PTPN13 | 22   | n/a            | NM_080683.2       | CACTGCTTTGGCTAATGAATCC         | M13-GGCATCAAAGAGTTTCTTAATGCTAC | GTA AACGACGGCCAGT |
| 126 | 79                    | PTPN13-23  | PTPN13 | 23   | n/a            | NM_080683.2       | M13-CAGAAATTTGCCTGAGTCCCTC     | CAGGCTTGGTTTCTTGATTAGC         | GTA AACGACGGCCAGT |
| 127 | 79                    | PTPN13-24a | PTPN13 | 24   | n/a            | NM_080683.2       | TCCACCTGGCATTATCATA C          | M13-GGGCATTAACTGTAATCCAACA     | GTA AACGACGGCCAGT |
| 128 | 79                    | PTPN13-24b | PTPN13 | 24   | n/a            | NM_080683.2       | AGCTTTGTCTGGGCTAGGTT           | M13-TGGAGGTATTTGATGTGCCCT      | GTA AACGACGGCCAGT |
| 129 | 79                    | PTPN13-25  | PTPN13 | 25   | n/a            | NM_080683.2       | ATACCATTGGAGTGCAAGTACA         | M13-CAGCATTATGAAACCATTCTGAAA   | GTA AACGACGGCCAGT |
| 130 | 79                    | PTPN13-26  | PTPN13 | 26   | n/a            | NM_080683.2       | M13-TGAGATGGATTGGCTTT CAG      | AGTTGTCACATACAAGATAACATGCC     | GTA AACGACGGCCAGT |
| 131 | 79                    | PTPN13-27a | PTPN13 | 27   | n/a            | NM_080683.2       | CCCACCTCAGTCTCCAGCAC           | M13-TCTGCCTAACCACTGTGAAGG      | GTA AACGACGGCCAGT |
| 132 | 79                    | PTPN13-27b | PTPN13 | 27   | n/a            | NM_080683.2       | tgttcctatgtaaacacagcatgta      | M13-catgatgaaaccaccacagc       | GTA AACGACGGCCAGT |
| 133 | 79                    | PTPN13-28  | PTPN13 | 28   | n/a            | NM_080683.2       | M13-GAGACCGTGTCTCAACAACAAC     | CCCTAAAGGGAAACTTTATGAACAC      | GTA AACGACGGCCAGT |
| 134 | 79                    | PTPN13-29  | PTPN13 | 29   | n/a            | NM_080683.2       | GACAGACTTGACTTCTTCACTTGG       | M13-TGGAACAGAAAGCATAAACCG      | GTA AACGACGGCCAGT |
| 135 | 79                    | PTPN13-30  | PTPN13 | 30   | n/a            | NM_080683.2       | CGTTGTGCCTATGATTCCAT           | M13-GGCTGTCATGACCTCCACATA      | GTA AACGACGGCCAGT |
| 136 | 79                    | PTPN13-31  | PTPN13 | 31   | n/a            | NM_080683.2       | M13-ACGTGCAACAAGAGGAGTTG       | TCCTGCCAATTTAGTCTATGAATTAC     | GTA AACGACGGCCAGT |
| 137 | 79                    | PTPN13-32  | PTPN13 | 32   | n/a            | NM_080683.2       | CTTGAGGCCAGGAGGATTG            | M13-AAGTGAACAGCTGGCAGTGAA      | GTA AACGACGGCCAGT |
| 138 | 79                    | PTPN13-33  | PTPN13 | 33   | n/a            | NM_080683.2       | M13-CAACATCCAGAAATGTGAGTTT     | ACGGTTACCTATGTGAGGCTCT         | GTA AACGACGGCCAGT |
| 139 | 79                    | PTPN13-34  | PTPN13 | 34   | n/a            | NM_080683.2       | M13-GGAGAGAGACAATGTGCAGTCC     | CAGAGACGAGAATGAATACTGGG        | GTA AACGACGGCCAGT |
| 140 | 79                    | PTPN13-35  | PTPN13 | 35   | n/a            | NM_080683.2       | M13-TCTGTTTAACACCTTGCCCTTTC    | TGTTTGGACTAACCTACTAGAAGTAAA    | GTA AACGACGGCCAGT |
| 141 | 79                    | PTPN13-36  | PTPN13 | 36   | n/a            | NM_080683.2       | TCCAAATGTATCATTATATCATGGC      | M13-TCTCTGATTATTTACCTTCTGGG    | GTA AACGACGGCCAGT |
| 142 | 79                    | PTPN13-37  | PTPN13 | 37   | n/a            | NM_080683.2       | ACTGATGCCTCAGCCACTG            | M13-CAGCCTCCAAAGCACTG          | GTA AACGACGGCCAGT |
| 143 | 79                    | PTPN13-38  | PTPN13 | 38   | n/a            | NM_080683.2       | M13-AAACGGGATCTGTCCAAGG        | GGACTCCAGCCTCTGTCTC            | GTA AACGACGGCCAGT |
| 144 | 79                    | PTPN13-39  | PTPN13 | 39   | n/a            | NM_080683.2       | M13-TCCATCGTAGGCGACAGAAC       | AAATCTTCTAATCTTGGCCAG          | GTA AACGACGGCCAGT |

|     | # of Tumors sequenced | Primer     | Gene   | Exon | CCDS accession | Ref Seq accession | Forward Primer               | Reverse Primer                  | Sequencing Primer |
|-----|-----------------------|------------|--------|------|----------------|-------------------|------------------------------|---------------------------------|-------------------|
| 145 | 79                    | PTPN13-40  | PTPN13 | 40   | n/a            | NM_080683.2       | M13-CACTCAGAATCAGCCTTAATCAAC | TAATGATTTGGCATCACCAGAC          | GTA AACGACGGCCAGT |
| 146 | 79                    | PTPN13-41  | PTPN13 | 41   | n/a            | NM_080683.2       | M13-TCATGATCTTTGACTCATGCAA   | GCAATCACGGAAAGAGTCCA            | GTA AACGACGGCCAGT |
| 147 | 79                    | PTPN13-42  | PTPN13 | 42   | n/a            | NM_080683.2       | TGGACAACAGAACGAGACCC         | M13-ATCCCAAGATCACACACATTATC     | GTA AACGACGGCCAGT |
| 148 | 79                    | PTPN13-43  | PTPN13 | 43   | n/a            | NM_080683.2       | M13-TTCCCAAGACTACCAGAAGGG    | CCTCACTGCAGTAAATGTTTGG          | GTA AACGACGGCCAGT |
| 149 | 79                    | PTPN13-44  | PTPN13 | 44   | n/a            | NM_080683.2       | AGCCTACACCCTGTTTCTTGC        | M13-GCATGTTGTATGAACTTGCTGC      | GTA AACGACGGCCAGT |
| 150 | 79                    | PTPN21-1   | PTPN21 | 1    | CCDS9884.1     | NM_007039         | M13-AGAGGATCGCTTTCTCTGG      | CTCCTGACCTTGTGATTGCG            | GTA AACGACGGCCAGT |
| 151 | 79                    | PTPN21-2   | PTPN21 | 2    | CCDS9884.1     | NM_007039         | M13-GGTCAGGGATTAGTGCAGCTG    | TCCTTTGTGCCTAGTGAACCC           | GTA AACGACGGCCAGT |
| 152 | 79                    | PTPN21-3   | PTPN21 | 3    | CCDS9884.1     | NM_007039         | M13-ACACACACAACCATGTGGAT     | TCATTGAGGTATTCCAAGTTCATTT       | GTA AACGACGGCCAGT |
| 153 | 79                    | PTPN21-4   | PTPN21 | 4    | CCDS9884.1     | NM_007039         | M13-CCAAGCCAAGACTCATATCTGC   | CAGGGAAAGCAGTCACTTGG            | GTA AACGACGGCCAGT |
| 154 | 79                    | PTPN21-5   | PTPN21 | 5    | CCDS9884.1     | NM_007039         | M13-GTCAATGGCCATGATTCCTTC    | GACTGGCTGCTTTCAACTTCC           | GTA AACGACGGCCAGT |
| 155 | 79                    | PTPN21-6   | PTPN21 | 6    | CCDS9884.1     | NM_007039         | M13-CCCTCAGCATTACGACATAC     | AACTTTGGTCAACAGGACCTC           | GTA AACGACGGCCAGT |
| 156 | 79                    | PTPN21-7   | PTPN21 | 7    | CCDS9884.1     | NM_007039         | M13-AACCAGTCCAGGGAACCTAGC    | TTTGAAGAAAGCGGCTTATTG           | GTA AACGACGGCCAGT |
| 157 | 79                    | PTPN21-8   | PTPN21 | 8    | CCDS9884.1     | NM_007039         | GACCTCGTGATCCACCAC           | M13-CTGCCTCCAACACATACAGG        | GTA AACGACGGCCAGT |
| 158 | 79                    | PTPN21-9   | PTPN21 | 9    | CCDS9884.1     | NM_007039         | TCTTTAGACAAACTCTGCATTAAACG   | M13-TTTACCTTTCAAGAATTACAATGGTTC | GTA AACGACGGCCAGT |
| 159 | 79                    | PTPN21-10  | PTPN21 | 10   | CCDS9884.1     | NM_007039         | CCGACAGAGAACCTCCCTTCT        | M13-AATATTAGTTGGACCTATGGGAAA    | GTA AACGACGGCCAGT |
| 160 | 79                    | PTPN21-11  | PTPN21 | 11   | CCDS9884.1     | NM_007039         | GTCATAGGGCTTGACATTGCC        | M13-GCTTCATGATCTCCAAGCATTTC     | GTA AACGACGGCCAGT |
| 161 | 79                    | PTPN21-12a | PTPN21 | 12   | CCDS9884.1     | NM_007039         | TAGATGAGGAAGCCGAGCTC         | M13-ATCTCGGGCTGGCTGTAGAC        | GTA AACGACGGCCAGT |
| 162 | 79                    | PTPN21-12b | PTPN21 | 12   | CCDS9884.1     | NM_007039         | M13-ATGTCGTCACCAACCTAGCATC   | CTGTCTCTGGAACGTTTGG             | GTA AACGACGGCCAGT |
| 163 | 79                    | PTPN21-12c | PTPN21 | 12   | CCDS9884.1     | NM_007039         | AACGTTCCAGGAGGACAGC          | M13-TCCTCTTCCCGCTCTG            | GTA AACGACGGCCAGT |
| 164 | 79                    | PTPN21-12d | PTPN21 | 12   | CCDS9884.1     | NM_007039         | AGCCTGAGCTACAGCTTCCAC        | M13-TGCTGTGGATTAGCATGGTG        | GTA AACGACGGCCAGT |
| 165 | 79                    | PTPN21-12e | PTPN21 | 12   | CCDS9884.1     | NM_007039         | M13-ACAAACGGAACAGCATCGAG     | TTCCACGATGTTCTTCTCCC            | GTA AACGACGGCCAGT |
| 166 | 79                    | PTPN21-12f | PTPN21 | 12   | CCDS9884.1     | NM_007039         | M13-TACGGCCATAAAGAAGTCCCTG   | GATGAGTGAAAGAAGCGCCAG           | GTA AACGACGGCCAGT |
| 167 | 79                    | PTPN21-13  | PTPN21 | 13   | CCDS9884.1     | NM_007039         | TGTGTGTTCTGCTTTCAGTG         | M13-ATCTCATGAAGGCATTTGCG        | GTA AACGACGGCCAGT |
| 168 | 79                    | PTPN21-14  | PTPN21 | 14   | CCDS9884.1     | NM_007039         | M13-ACAGTGCTAGATTTGAAGCAGAAA | CCCAGCTTGCAGTACAGTTTG           | GTA AACGACGGCCAGT |
| 169 | 79                    | PTPN21-15  | PTPN21 | 15   | CCDS9884.1     | NM_007039         | CAGCAAGGTTAAACAGGTTGC        | M13-TTTCTCCACAGGTCAGGATTC       | GTA AACGACGGCCAGT |
| 170 | 79                    | PTPN21-16  | PTPN21 | 16   | CCDS9884.1     | NM_007039         | M13-TCAGATGTGCCGTCTATGTGAG   | TTCCGAAACATAAATGTTCTCTC         | GTA AACGACGGCCAGT |
| 171 | 79                    | PTPN21-17  | PTPN21 | 17   | CCDS9884.1     | NM_007039         | GCACCCAGTCTCTTTATCTG         | M13-ACAGTCCAAGGAAATGTGCG        | GTA AACGACGGCCAGT |
| 172 | 79                    | PTPN21-18  | PTPN21 | 18   | CCDS9884.1     | NM_007039         | M13-GAGACTGTCCATCTCCAACC     | GTGGATCAAGTGTCAACGGG            | GTA AACGACGGCCAGT |
| 173 | 79                    | PTPN23-1   | PTPN23 | 1    | CCDS2754.1     | NM_015466         | M13-CTCCCGTGACCAGTGACTTC     | GGTTCAGATGAAGATGCAGGTG          | GTA AACGACGGCCAGT |
| 174 | 79                    | PTPN23-2   | PTPN23 | 2    | CCDS2754.1     | NM_015466         | AATCCTGAGTCTGTTGGTG          | M13-TCAAATGATCTGCCACCTC         | GTA AACGACGGCCAGT |
| 175 | 79                    | PTPN23-3   | PTPN23 | 3    | CCDS2754.1     | NM_015466         | TGGCATTGTGAGTTAGCTGG         | M13-CTATGCAGCAAGGAGAAGGG        | GTA AACGACGGCCAGT |
| 176 | 79                    | PTPN23-4   | PTPN23 | 4    | CCDS2754.1     | NM_015466         | GCTTCATTACCTGCAGAGTCG        | M13-GCCATCTGAAGAGCTGAAAGC       | GTA AACGACGGCCAGT |
| 177 | 79                    | PTPN23-5   | PTPN23 | 5    | CCDS2754.1     | NM_015466         | M13-TCTGAGTTCCTGTTCCCTC      | GTACAGGAGACCTTCATGCC            | GTA AACGACGGCCAGT |
| 178 | 79                    | PTPN23-6   | PTPN23 | 6    | CCDS2754.1     | NM_015466         | M13-GGAACATGTGGACATACCAGG    | CCTGATCAACAAAGCCAAGG            | GTA AACGACGGCCAGT |
| 179 | 79                    | PTPN23-7   | PTPN23 | 7    | CCDS2754.1     | NM_015466         | M13-GGGAAGGATAAAGGGAAGGG     | CAAGTTTCTCCAGTCTTCTGG           | GTA AACGACGGCCAGT |
| 180 | 79                    | PTPN23-8   | PTPN23 | 8    | CCDS2754.1     | NM_015466         | M13-AGTGACAGGTAGGGACGG       | AAGAAGAAGAGACGCCACGAC           | GTA AACGACGGCCAGT |
| 181 | 79                    | PTPN23-9   | PTPN23 | 9    | CCDS2754.1     | NM_015466         | M13-GATCTACTACTTCGAGCCGTG    | CACTTAAGACACCAGGCCTCC           | GTA AACGACGGCCAGT |

|     | # of Tumors sequenced | Primer     | Gene   | Exon | CCDS accession | Ref Seq accession | Forward Primer             | Reverse Primer            | Sequencing Primer |
|-----|-----------------------|------------|--------|------|----------------|-------------------|----------------------------|---------------------------|-------------------|
| 182 | 79                    | PTPN23-10  | PTPN23 | 10   | CCDS2754.1     | NM_015466         | M13-TCATCTGATGGACAGGCAGG   | CAGAGGGACAAGACCCTTCAC     | GTA AACGACGGCCAGT |
| 183 | 79                    | PTPN23-11  | PTPN23 | 11   | CCDS2754.1     | NM_015466         | M13-CCTGAGGGTATAGGAGCAAGC  | GAAGTCGTTGCTCTTGGC        | GTA AACGACGGCCAGT |
| 184 | 79                    | PTPN23-12  | PTPN23 | 12   | CCDS2754.1     | NM_015466         | M13-TGGCATCTACATGGGAAGTAGG | CTGTAACAGCTGGGTCTGTGG     | GTA AACGACGGCCAGT |
| 185 | 79                    | PTPN23-13  | PTPN23 | 13   | CCDS2754.1     | NM_015466         | CCAGCATTGGACACTCTTCAG      | M13-CTCACTGCAGAAGCGACAGAG | GTA AACGACGGCCAGT |
| 186 | 79                    | PTPN23-14  | PTPN23 | 14   | CCDS2754.1     | NM_015466         | M13-CTGACATCTTTGCCAACTGG   | TGGACATTTATTCTCTCCC       | GTA AACGACGGCCAGT |
| 187 | 79                    | PTPN23-15  | PTPN23 | 15   | CCDS2754.1     | NM_015466         | M13-CAGATTGAGTGGTGGGCTTG   | TGATTCAGAGGAGTGGGTGTG     | GTA AACGACGGCCAGT |
| 188 | 79                    | PTPN23-16  | PTPN23 | 16   | CCDS2754.1     | NM_015466         | CCTCACTTAAGCCCTGACCTG      | M13-CCTTGTCTCTGTGGGCAG    | GTA AACGACGGCCAGT |
| 189 | 79                    | PTPN23-17  | PTPN23 | 17   | CCDS2754.1     | NM_015466         | M13-AATGGGCCAAGTACATGGAAG  | GACACTCAGGGCCTCGACTC      | GTA AACGACGGCCAGT |
| 190 | 79                    | PTPN23-18  | PTPN23 | 18   | CCDS2754.1     | NM_015466         | M13-CCACTCAGAGATGAAGTGGG   | CCAGATCTGCGTAGAAGTCCC     | GTA AACGACGGCCAGT |
| 191 | 79                    | PTPN23-19  | PTPN23 | 19   | CCDS2754.1     | NM_015466         | M13-CCAGTCCTCTGCTTTCCC     | TTCCACTGCCTCACTCTCCTC     | GTA AACGACGGCCAGT |
| 192 | 79                    | PTPN23-20a | PTPN23 | 20   | CCDS2754.1     | NM_015466         | M13-CAGGTTTGTGTGGCCCTG     | GGCTGTATCAGCTGGGTGG       | GTA AACGACGGCCAGT |
| 193 | 79                    | PTPN23-20b | PTPN23 | 20   | CCDS2754.1     | NM_015466         | AGGAGAGTGAGGCAGTGAAG       | M13-AGGGTAGGTGAAGGCGTGG   | GTA AACGACGGCCAGT |
| 194 | 79                    | PTPN23-20c | PTPN23 | 20   | CCDS2754.1     | NM_015466         | GTGGTGAGCAGTCCCTATGTG      | M13-GGGTAGAGCTGGGTGTGTAGG | GTA AACGACGGCCAGT |
| 195 | 79                    | PTPN23-20d | PTPN23 | 20   | CCDS2754.1     | NM_015466         | CAGCACCCTCTCTCTGGG         | M13-CCCATGGGTCTGGTAGAAGG  | GTA AACGACGGCCAGT |
| 196 | 79                    | PTPN23-20e | PTPN23 | 20   | CCDS2754.1     | NM_015466         | M13-CACAAGCGTTTGGGCCCTC    | GTGAAGGCACCAGGTGGG        | GTA AACGACGGCCAGT |
| 197 | 79                    | PTPN23-20f | PTPN23 | 20   | CCDS2754.1     | NM_015466         | M13-CCTACACACCCAGCTCTACCC  | GACAGTGTCAGAGCTCCAC       | GTA AACGACGGCCAGT |
| 198 | 79                    | PTPN23-20g | PTPN23 | 20   | CCDS2754.1     | NM_015466         | CTGCAGACCTGCTCTCTCC        | M13-GCAGCTGGCATTGATGTAGTC | GTA AACGACGGCCAGT |
| 199 | 79                    | PTPN23-20h | PTPN23 | 20   | CCDS2754.1     | NM_015466         | GATGTGGGAGCTCTGGACAC       | M13-TTGCTGAGGGACAGATAAGCC | GTA AACGACGGCCAGT |
| 200 | 79                    | PTPN23-20i | PTPN23 | 20   | CCDS2754.1     | NM_015466         | M13-AGCCCCCTGCCTACACACC    | GGGACCTGGGTAGAGCTG        | GTA AACGACGGCCAGT |
| 201 | 79                    | PTPN23-21  | PTPN23 | 21   | CCDS2754.1     | NM_015466         | M13-GAGGCTGAGATGGAGAAGGTG  | CAGGAAGGCCTATGAGCCAG      | GTA AACGACGGCCAGT |
| 202 | 79                    | PTPN23-22  | PTPN23 | 22   | CCDS2754.1     | NM_015466         | M13-TAAGTGCTGTCCAGTCCCTGG  | ATAGAGCAGTCAAAGGCTCC      | GTA AACGACGGCCAGT |
| 203 | 79                    | PTPN23-23  | PTPN23 | 23   | CCDS2754.1     | NM_015466         | ATTGTGCACTGCAGGTAGAGG      | M13-TGCCTCATAGCAGAACCTGAG | GTA AACGACGGCCAGT |
| 204 | 79                    | PTPN23-24  | PTPN23 | 24   | CCDS2754.1     | NM_015466         | M13-GCAGGAGAAGGTGAGGATCTG  | CCTGAGGAAGGTGGTCTGTAG     | GTA AACGACGGCCAGT |
| 205 | 79                    | PTPN23-25a | PTPN23 | 25   | CCDS2754.1     | NM_015466         | AAGCATCAGCCAGAAGGTGAG      | M13-TCAGGTCTTGTGAGTGTCCAG | GTA AACGACGGCCAGT |
| 206 | 79                    | PTPN23-25b | PTPN23 | 25   | CCDS2754.1     | NM_015466         | ATTGCCAAGCTCAGCATTC        | M13-GCCAAAGGCAGCAGAAATG   | GTA AACGACGGCCAGT |
| 207 | 79                    | PTPN5-1    | PTPN5  | 1    | CCDS41626.1    | NM_001039970      | M13-ATGATCTGAAGCTGCCTCTC   | CCAAACCATAGCCAGGAAGAG     | GTA AACGACGGCCAGT |
| 208 | 79                    | PTPN5-2    | PTPN5  | 2    | CCDS41626.1    | NM_001039970      | GAGGGAGCCTTCTTATCTTTC      | M13-AACGAAGAGCTATGGAGCAGC | GTA AACGACGGCCAGT |
| 209 | 79                    | PTPN5-3    | PTPN5  | 3    | CCDS41626.1    | NM_001039970      | M13-GCITTTGCTAATCGAGGGTGAC | CCTTATCTCTGCCTTCCAG       | GTA AACGACGGCCAGT |
| 210 | 79                    | PTPN5-4    | PTPN5  | 4    | CCDS41626.1    | NM_001039970      | M13-GGACCTTAGAGGTTCCAGGAGC | CAGGCAGAAGAACTTCAGGG      | GTA AACGACGGCCAGT |
| 211 | 79                    | PTPN5-5    | PTPN5  | 5    | CCDS41626.1    | NM_001039970      | M13-CCACGGTAAGTAAGCTTTGGG  | GATGGGAGCTGGTAGAAATCC     | GTA AACGACGGCCAGT |
| 212 | 79                    | PTPN5-6    | PTPN5  | 6    | CCDS41626.1    | NM_001039970      | ATGGGCACCTCCAGGAACAC       | M13-CAGGAGTCAGAGTCAGGCATC | GTA AACGACGGCCAGT |
| 213 | 79                    | PTPN5-7    | PTPN5  | 7    | CCDS41626.1    | NM_001039970      | M13-GTTCCAGCTGATCTCTCCC    | ATGCTGAGTTCAGGCACC        | GTA AACGACGGCCAGT |
| 214 | 79                    | PTPN5-8    | PTPN5  | 8    | CCDS41626.1    | NM_001039970      | M13-ATGCGTCTGAGCACTAACTC   | CACCTCTCCAGTCTGTCTAC      | GTA AACGACGGCCAGT |
| 215 | 79                    | PTPN5-9    | PTPN5  | 9    | CCDS41626.1    | NM_001039970      | GCAGAAGAAGTGTGGGTATGC      | M13-CCACACTCAGGCTCTTCACAG | GTA AACGACGGCCAGT |
| 216 | 79                    | PTPN5-10   | PTPN5  | 10   | CCDS41626.1    | NM_001039970      | M13-CTGTGAAGAGCCTGAGTGTGG  | CTTACCGAGCCTCACATCTCC     | GTA AACGACGGCCAGT |
| 217 | 79                    | PTPN5-11   | PTPN5  | 11   | CCDS41626.1    | NM_001039970      | CCTTGTGATCTCTCCGCTGG       | M13-TCCCAAGTCCATTCACCTCTC | GTA AACGACGGCCAGT |
| 218 | 79                    | PTPN5-12   | PTPN5  | 12   | CCDS41626.1    | NM_001039970      | M13-TCTCTATCTCTGGGCTGGTTG  | AGATGCTGGTGGCAATGAAG      | GTA AACGACGGCCAGT |

|     | # of Tumors sequenced | Primer    | Gene  | Exon | CCDS accession | Ref Seq accession | Forward Primer                | Reverse Primer                  | Sequencing Primer |
|-----|-----------------------|-----------|-------|------|----------------|-------------------|-------------------------------|---------------------------------|-------------------|
| 219 | 79                    | PTPN5-13  | PTPN5 | 13   | CCDS41626.1    | NM_001039970      | GACAGAGTGGGACTGAGGAGC         | M13-ATGCACATGTGGGTCTCTCC        | GTA AACGACGGCCAGT |
| 220 | 79                    | PTPN5-14  | PTPN5 | 14   | CCDS41626.1    | NM_001039970      | M13-CTGGCAAGTGATTGCTACTCC     | GAGGACAGAGGGAGCTGACTG           | GTA AACGACGGCCAGT |
| 221 | 79                    | PTPRB-1   | PTPRB | 1    | n/a            | NM_001109754.1    | GTCAGAATGGCAGCGTGG            | M13-GAAAGTGGAGTGGGAATTTGG       | GTA AACGACGGCCAGT |
| 222 | 79                    | PTPRB-2   | PTPRB | 2    | n/a            | NM_001109754.1    | M13-AGAAAGTGTGGCTTGAGGAGC     | TTTGTATCCCTGGAAC TCAAATG        | GTA AACGACGGCCAGT |
| 223 | 79                    | PTPRB-3   | PTPRB | 3    | n/a            | NM_001109754.1    | AAAGTCTTCAAGCCATGTTCTTT       | M13-TCCACTGTATCCACAAGCTC        | GTA AACGACGGCCAGT |
| 224 | 79                    | PTPRB-4   | PTPRB | 4    | n/a            | NM_001109754.1    | GGAACACAATGAATATGTGACTTCTA    | M13-AAAGTGGATATGGGTCTTCTATACCTT | GTA AACGACGGCCAGT |
| 225 | 79                    | PTPRB-5   | PTPRB | 5    | n/a            | NM_001109754.1    | CAAGGAATGTGGCTTG CAG          | M13-GCTCCACTTCTCAGATTGGG        | GTA AACGACGGCCAGT |
| 226 | 79                    | PTPRB-6   | PTPRB | 6    | n/a            | NM_001109754.1    | M13-TGTCTCCTATCTACTGCTGCC     | CAGTTACGGCAGTTACCTGGG           | GTA AACGACGGCCAGT |
| 227 | 79                    | PTPRB-7   | PTPRB | 7    | n/a            | NM_001109754.1    | M13-AAATAAATGTTGAACTGAAACACGC | ATCCATAAAGCAATGCCAG             | GTA AACGACGGCCAGT |
| 228 | 79                    | PTPRB-8   | PTPRB | 8    | n/a            | NM_001109754.1    | GAAGTGAAGTCTATAGCAACAACACA    | M13-TTGTAAGGCCAGGGATGAGT        | GTA AACGACGGCCAGT |
| 229 | 79                    | PTPRB-9   | PTPRB | 9    | n/a            | NM_001109754.1    | TGCTGACTGCAATAGACGACTC        | M13-ATTGCTACAGCTCTGTGGTGC       | GTA AACGACGGCCAGT |
| 230 | 79                    | PTPRB-10a | PTPRB | 10   | n/a            | NM_001109754.1    | M13-ATTGCTCCAGCTTGT CATCTG    | GGCTTGGCTGAATGATGTTAG           | GTA AACGACGGCCAGT |
| 231 | 79                    | PTPRB-10b | PTPRB | 10   | n/a            | NM_001109754.1    | M13-tgtcccagctgtcatctg        | tcagatttccaatcgtcc              | GTA AACGACGGCCAGT |
| 232 | 79                    | PTPRB-11a | PTPRB | 11   | n/a            | NM_001109754.1    | M13-GTTGCCAGTTCCTGAATGTG      | TCGAAATACCTGAACTACCCG           | GTA AACGACGGCCAGT |
| 233 | 79                    | PTPRB-11b | PTPRB | 11   | n/a            | NM_001109754.1    | M13-tgttccagcttcttgaatg       | ccactgcatctattcaggttca          | GTA AACGACGGCCAGT |
| 234 | 79                    | PTPRB-12a | PTPRB | 12   | n/a            | NM_001109754.1    | M13-GTTCTCTCAGTGGGTGCCAA      | ATTTGTGAATAGCTGAGCCCG           | GTA AACGACGGCCAGT |
| 235 | 79                    | PTPRB-12b | PTPRB | 12   | n/a            | NM_001109754.1    | M13-gtgccaaaacatcagaagca      | caatctagccctctccagggt           | GTA AACGACGGCCAGT |
| 236 | 79                    | PTPRB-13a | PTPRB | 13   | n/a            | NM_001109754.1    | CAAATGCATCATCTTCTACTCTGC      | M13-TCTCCCAATGTTGCTTCATCC       | GTA AACGACGGCCAGT |
| 237 | 79                    | PTPRB-13b | PTPRB | 13   | n/a            | NM_001109754.1    | M13-tgtccactgtctctctg         | ctcaccctggggttcttaca            | GTA AACGACGGCCAGT |
| 238 | 79                    | PTPRB-14a | PTPRB | 14   | n/a            | NM_001109754.1    | M13-TTCCCGTATCACTGAATCCAAC    | GGAACCTAAGGACCAACCAAGG          | GTA AACGACGGCCAGT |
| 239 | 79                    | PTPRB-14b | PTPRB | 14   | n/a            | NM_001109754.1    | M13-ctgctccctctcctcactg       | ccccacgattcattactgct            | GTA AACGACGGCCAGT |
| 240 | 79                    | PTPRB-15  | PTPRB | 15   | n/a            | NM_001109754.1    | M13-ATGTACGACTCACCCACATGC     | ACAGTCCCTTCCCAATTCAG            | GTA AACGACGGCCAGT |
| 241 | 79                    | PTPRB-16a | PTPRB | 16   | n/a            | NM_001109754.1    | M13-TGATGTTGCTCAGCTATCTTATTTG | TCCAAGCCCTATTTGAGTAAGATG        | GTA AACGACGGCCAGT |
| 242 | 79                    | PTPRB-16b | PTPRB | 16   | n/a            | NM_001109754.1    | M13-tggcatagctgtgattatgga     | tccattgagaataagagtagcaaa        | GTA AACGACGGCCAGT |
| 243 | 79                    | PTPRB-17  | PTPRB | 17   | n/a            | NM_001109754.1    | TCAGAGCTAGTTGGACCCAAAG        | M13-TGGCAATCAGACAGGCTTATG       | GTA AACGACGGCCAGT |
| 244 | 79                    | PTPRB-18  | PTPRB | 18   | n/a            | NM_001109754.1    | M13-TCACACACACAGCTGATGC       | AACAGGCTTTATTGCCAAAG            | GTA AACGACGGCCAGT |
| 245 | 79                    | PTPRB-19  | PTPRB | 19   | n/a            | NM_001109754.1    | M13-TGCCAGAGATAGTGATGTG       | AGCTCGCATGCATCAGTTG             | GTA AACGACGGCCAGT |
| 246 | 79                    | PTPRB-20  | PTPRB | 20   | n/a            | NM_001109754.1    | M13-CTACCCTGCTACCCACTGACC     | CACCATCAGCCAATATCTCCC           | GTA AACGACGGCCAGT |
| 247 | 79                    | PTPRB-21  | PTPRB | 21   | n/a            | NM_001109754.1    | M13-AAGTAAATGCCTCATCTGTTGG    | AAGGGCTGAATTCATCAATGG           | GTA AACGACGGCCAGT |
| 248 | 79                    | PTPRB-22  | PTPRB | 22   | n/a            | NM_001109754.1    | M13-TTCCCTCCCTCAGAGATGTTG     | TCCGGTTACTGTGAAGAGAAGC          | GTA AACGACGGCCAGT |
| 249 | 79                    | PTPRB-23  | PTPRB | 23   | n/a            | NM_001109754.1    | M13-AAGGGTAAGCACCATTTGTC      | TTCTGCCTGAGTTGTACCTCG           | GTA AACGACGGCCAGT |
| 250 | 79                    | PTPRB-24  | PTPRB | 24   | n/a            | NM_001109754.1    | TGGCTTCTTTCACAGTAACCG         | M13-GCAGCTCCTA ACTTCTGAGC       | GTA AACGACGGCCAGT |
| 251 | 79                    | PTPRB-25  | PTPRB | 25   | n/a            | NM_001109754.1    | TCAGGGCTAATGCATGTTGAG         | M13-GCATTAGAGCTTGAGATTGTCC      | GTA AACGACGGCCAGT |
| 252 | 79                    | PTPRB-26  | PTPRB | 26   | n/a            | NM_001109754.1    | TTATCTGCCTGAGCCTCATC          | M13-GAGGAGTGGCATCTCCAGTG        | GTA AACGACGGCCAGT |
| 253 | 79                    | PTPRB-27  | PTPRB | 27   | n/a            | NM_001109754.1    | M13-AGACTTGGCAGAGACCTCCC      | GGGTTTCACTTTGATGATGGG           | GTA AACGACGGCCAGT |
| 254 | 79                    | PTPRB-28  | PTPRB | 28   | n/a            | NM_001109754.1    | M13-ATTGCTTTAGCAGCTGATCCC     | GCAACTCTATGGGCTGAAAC            | GTA AACGACGGCCAGT |
| 255 | 79                    | PTPRB-29  | PTPRB | 29   | n/a            | NM_001109754.1    | TTCGCTGGTTCTCTCTTGTAG         | M13-GTTGGTCCAGACAAATCCTCC       | GTA AACGACGGCCAGT |

|     | # of Tumors sequenced | Primer   | Gene  | Exon | CCDS accession          | Ref Seq accession    | Forward Primer                   | Reverse Primer               | Sequencing Primer |
|-----|-----------------------|----------|-------|------|-------------------------|----------------------|----------------------------------|------------------------------|-------------------|
| 256 | 79                    | PTPRB-30 | PTPRB | 30   | n/a                     | NM_001109754.1       | TCTCCCATAACTGGGAAGGG             | M13-CCTTGTCAGATTAAGGTCCTGG   | GTA AACGACGGCCAGT |
| 257 | 79                    | PTPRB-31 | PTPRB | 31   | n/a                     | NM_001109754.1       | CCAGAGACCATTAGTGAAGCG            | M13-GGCTGGTTTCAAACCTTAGGC    | GTA AACGACGGCCAGT |
| 258 | 79                    | PTPRB-32 | PTPRB | 32   | n/a                     | NM_001109754.1       | M13-AGGCGATGGGCTAGAATCAC         | CTCTGTAGGGCATGAAGCAAG        | GTA AACGACGGCCAGT |
| 259 | 79                    | PTPRC-1  | PTPRC | 1    | CCDS1397.1              | NM_002838            | M13-ATGCAGCTAGCAAGTGGTTTG        | TGATGGTTTACAGCAGGCTTC        | GTA AACGACGGCCAGT |
| 260 | 79                    | PTPRC-2  | PTPRC | 2    | CCDS1397.1              | NM_002838            | M13-ATATTTGGGCTTTGTAACATGG       | TGTGATTTACTGTCAAGTTTGGG      | GTA AACGACGGCCAGT |
| 261 | 79                    | PTPRC-3  | PTPRC | 3    | CCDS1397.1              | NM_002838            | M13-GGGAGGAGCATACATTAGGG         | TTGGAGATCTTGCTTCCCTTC        | GTA AACGACGGCCAGT |
| 262 | 79                    | PTPRC-4  | PTPRC | 4    | CCDS1397.1              | NM_002838            | M13-TCGCAATTTGCTCCTTATAACC       | TGGTTAGATTTCTCACACCATT       | GTA AACGACGGCCAGT |
| 263 | 79                    | PTPRC-5  | PTPRC | 5    | CCDS1397.1              | NM_002838            | TGTAGAATGCATGTGCTGTGG            | M13-TTTGCATAATTTGGTGTGATACG  | GTA AACGACGGCCAGT |
| 264 | 79                    | PTPRC-6  | PTPRC | 6    | CCDS1397.1              | NM_002838            | M13-CGAATGTCAAATCAAACGAGG        | AAAGAAAGGAGCCCGAGGTAG        | GTA AACGACGGCCAGT |
| 265 | 79                    | PTPRC-7  | PTPRC | 7    | CCDS1397.1              | NM_002838            | CCGCCAATTAGATGCGTACC             | M13-TAGTGGGTCCTGAAAGCTTGG    | GTA AACGACGGCCAGT |
| 266 | 79                    | PTPRC-8  | PTPRC | 8    | CCDS1397.1              | NM_002838            | TGAGGTCCTTGTAGGGCAG              | M13-CACCAGACTAGCTCCTGTGACC   | GTA AACGACGGCCAGT |
| 267 | 79                    | PTPRC-9  | PTPRC | 9    | CCDS1397.1              | NM_002838            | M13-CATGTTAGGAATGAATGAGGGC       | AGAACAAGAGAGGCAGGGAGG        | GTA AACGACGGCCAGT |
| 268 | 79                    | PTPRC-10 | PTPRC | 10   | CCDS1397.1              | NM_002838            | M13-TGGTAATTTCCACAGATGTTTCA      | TGGACTTTCATATACGACACCAAA     | GTA AACGACGGCCAGT |
| 269 | 79                    | PTPRC-11 | PTPRC | 11   | CCDS1397.1              | NM_002838            | M13-ACAGTGCCAACTGGTGTGAC         | AGCTTTGTGACTACTGGCTC         | GTA AACGACGGCCAGT |
| 270 | 79                    | PTPRC-12 | PTPRC | 12   | CCDS1397.1              | NM_002838            | GAGTTCACCTGGAACAATGTGATG         | M13-AAATGTGCCAGGTAATGTGC     | GTA AACGACGGCCAGT |
| 271 | 79                    | PTPRC-13 | PTPRC | 13   | CCDS1397.1              | NM_002838            | M13-AAATGAGTGATTTATTTCTTCAGGGTTT | TGTGAGCAGTGGTCTTAAAGTTATTT   | GTA AACGACGGCCAGT |
| 272 | 79                    | PTPRC-14 | PTPRC | 14   | CCDS1397.1              | NM_002838            | CCTTGAAGTTTAAAGCAAATCAGC         | M13-TCCTCTTATGAATTCACAAACCTT | GTA AACGACGGCCAGT |
| 273 | 79                    | PTPRC-15 | PTPRC | 15   | CCDS1397.1              | NM_002838            | M13-TGGAGGTGATTATCAACCAGTC       | TGAAGTGGGCTGTATGCTGTCT       | GTA AACGACGGCCAGT |
| 274 | 79                    | PTPRC-16 | PTPRC | 16   | CCDS1397.1              | NM_002838            | CTCTGCTCAAGGCTCTTCTCTC           | M13-GAGATTGCACCACCACACTTC    | GTA AACGACGGCCAGT |
| 275 | 79                    | PTPRC-17 | PTPRC | 17   | CCDS1397.1              | NM_002838            | M13-TGTGTACGAGGAGGAAAGAAGC       | AAAGGCAAATGGCAATATAAATACAC   | GTA AACGACGGCCAGT |
| 276 | 79                    | PTPRC-18 | PTPRC | 18   | CCDS1397.1              | NM_002838            | GAGATTTGTCTGAAAGTTGTCAATC        | M13-CCCTGCATCTCCGTTTATCTC    | GTA AACGACGGCCAGT |
| 277 | 79                    | PTPRC-19 | PTPRC | 19   | CCDS1397.1              | NM_002838            | ATAAAGGAAGCTCGAAAGCCC            | M13-CAGTGACATATGGGCTCACTTC   | GTA AACGACGGCCAGT |
| 278 | 79                    | PTPRC-20 | PTPRC | 20   | CCDS1397.1              | NM_002838            | M13-TGCCAGAGAAATTCACAATC         | TCTGTTCCAAATCATCTCTC         | GTA AACGACGGCCAGT |
| 279 | 79                    | PTPRC-21 | PTPRC | 21   | CCDS1397.1              | NM_002838            | M13-ACCCAGGAAATACATTGCTGC        | TCATCAGGCAGATACATGTGG        | GTA AACGACGGCCAGT |
| 280 | 79                    | PTPRC-22 | PTPRC | 22   | CCDS1397.1              | NM_002838            | TTCAGGACACATTAGTGGGAAATAG        | M13-TGTTCTAACCCAGCTTTCATCC   | GTA AACGACGGCCAGT |
| 281 | 79                    | PTPRC-23 | PTPRC | 23   | CCDS1397.1              | NM_002838            | M13-TTTGTACTGGTACTCCCTTCCAC      | TCTCTAACGCCCTAGGCAGG         | GTA AACGACGGCCAGT |
| 282 | 79                    | PTPRC-24 | PTPRC | 24   | CCDS1397.1              | NM_002838            | AGAGACATCTTCCCTTTGGC             | M13-TGTGGTCATCTTCTTCCACAG    | GTA AACGACGGCCAGT |
| 283 | 79                    | PTPRC-25 | PTPRC | 25   | CCDS1397.1              | NM_002838            | M13-TGCCATGAATTGTTCCAATATG       | TCTGGTGAAGACTAAATGCAAGC      | GTA AACGACGGCCAGT |
| 284 | 79                    | PTPRC-26 | PTPRC | 26   | CCDS1397.1              | NM_002838            | TCTTTAGTGCATACTAGCCCTGTC         | M13-TGACTGTGTGCCACATTAAC     | GTA AACGACGGCCAGT |
| 285 | 79                    | PTPRC-27 | PTPRC | 27   | CCDS1397.1              | NM_002838            | TGTTGTTTGACATGGAATTATGTTT        | M13-TCGCTTAATGAATGGCCC       | GTA AACGACGGCCAGT |
| 286 | 79                    | PTPRC-28 | PTPRC | 28   | CCDS1397.1              | NM_002838            | TGTTTCGCAAGATATGTTGAATCTT        | M13-GATGAAGCAAGCAATCCAAGAC   | GTA AACGACGGCCAGT |
| 287 | 79                    | PTPRC-29 | PTPRC | 29   | CCDS1397.1              | NM_002838            | M13-GCACAGACAGAAAGAAAGGG         | TATATGATGGCCTTGCCTGC         | GTA AACGACGGCCAGT |
| 288 | 79                    | PTPRC-30 | PTPRC | 30   | CCDS1397.1              | NM_002838            | M13-AAATTACTCTATGCAGGCAAGGC      | ACCAAGAGAGTGACCGACTCC        | GTA AACGACGGCCAGT |
| 289 | 79                    | PTPRC-31 | PTPRC | 31   | CCDS1397.1              | NM_002838            | TTTGGTCTTGAAGAGGTTGG             | M13-AAGAACAACGAGAGGAAAGGAG   | GTA AACGACGGCCAGT |
| 290 | 79                    | PTPRC-32 | PTPRC | 32   | CCDS1397.1              | NM_002838            | M13-TCATCCAATACTTCCACAATAAATC    | TTCTACAATAATTGGTTCGCTGC      | GTA AACGACGGCCAGT |
| 291 | 79                    | PTPRD-1  | PTPRD | 1    | CCDS43786.1, CCDS6472.1 | NM_002839, NM_130391 | M13-AATTTAGATCGGACGACTCG         | ATCTCTTCAAAGGCTGGCTG         | GTA AACGACGGCCAGT |
| 292 | 79                    | PTPRD-2  | PTPRD | 2    | CCDS43786.1, CCDS6472.1 | NM_002839, NM_130391 | ATGTATGCTTGTATGGCGGTG            | M13-AAGCAAGCAAGTAACGTAGAAACC | GTA AACGACGGCCAGT |



|     | # of Tumors sequenced | Primer    | Gene  | Exon | CCDS accession          | Ref Seq accession    | Forward Primer                  | Reverse Primer                 | Sequencing Primer |
|-----|-----------------------|-----------|-------|------|-------------------------|----------------------|---------------------------------|--------------------------------|-------------------|
| 293 | 79                    | PTPRD-3   | PTPRD | 3    | CCDS43786.1, CCDS6472.1 | NM_002839, NM_130391 | M13-TCCACCACTGTATTGAGAGCTTTAG   | AAGCACCATCACAAATGCTAGTC        | GTA AACGACGGCCAGT |
| 294 | 79                    | PTPRD-4   | PTPRD | 4    | CCDS43786.1, CCDS6472.1 | NM_002839, NM_130391 | M13-TGTTAGGTTCTCAACAAGCACTG     | ACATCACAAACATGGACCACC          | GTA AACGACGGCCAGT |
| 295 | 79                    | PTPRD-5   | PTPRD | 5    | CCDS43786.1, CCDS6472.1 | NM_002839, NM_130391 | GTTGAGTGGACCTTCGCTTTG           | M13-AATATAACAACACGGACCCTGC     | GTA AACGACGGCCAGT |
| 296 | 79                    | PTPRD-6   | PTPRD | 6    | CCDS43786.1, CCDS6472.1 | NM_002839, NM_130391 | TGTACGGTGCATGTCTGTGT            | M13-GGATGGGCTTTCTAGAGGCAT      | GTA AACGACGGCCAGT |
| 297 | 79                    | PTPRD-7a  | PTPRD | 7    | CCDS43786.1, CCDS6472.1 | NM_002839, NM_130391 | M13-AATGCGTGCAGGATCACTTAG       | TTTGTGTAGCACAGGTTTCGC          | GTA AACGACGGCCAGT |
| 298 | 79                    | PTPRD-7b  | PTPRD | 7    | CCDS43786.1, CCDS6472.1 | NM_002839, NM_130391 | CATCACA CTGACGTGGGACTC          | M13-TCCTTCTCACCTCTTTCACC       | GTA AACGACGGCCAGT |
| 299 | 79                    | PTPRD-8   | PTPRD | 8    | CCDS43786.1, CCDS6472.1 | NM_002839, NM_130391 | M13-GCAGGTTACGCTAATGGAAGAAC     | CAAAGCCTCCAATAA CCACTG         | GTA AACGACGGCCAGT |
| 300 | 79                    | PTPRD-9   | PTPRD | 9    | CCDS43786.1, CCDS6472.1 | NM_002839, NM_130391 | M13-CTTCCCTATTCCAGTTACCTTTG     | GCAGGTTTGCTTATTGGTGAAG         | GTA AACGACGGCCAGT |
| 301 | 79                    | PTPRD-10  | PTPRD | 10   | CCDS43786.1, CCDS6472.1 | NM_002839, NM_130391 | TTGTCCTTATTGTCGTTTATTTATTT      | M13-TGAGCCTATTGAAAGACAGCA      | GTA AACGACGGCCAGT |
| 302 | 79                    | PTPRD-11  | PTPRD | 11   | CCDS43786.1, CCDS6472.1 | NM_002839, NM_130391 | M13-TTTGAAAGAGAAACCTAAGTAAAGAAA | AAATAAGAGCAATTT CAGGATATGA     | GTA AACGACGGCCAGT |
| 303 | 79                    | PTPRD-12  | PTPRD | 12   | CCDS43786.1, CCDS6472.1 | NM_002839, NM_130391 | GTGGCAGCAAAATCACACATTC          | M13-TTTGTTAGTTCATGCATCCAAGC    | GTA AACGACGGCCAGT |
| 304 | 79                    | PTPRD-13  | PTPRD | 13   | CCDS43786.1, CCDS6472.1 | NM_002839, NM_130391 | M13-ATTTGCAGAAATGAAGGCAGAC      | TGGACAAATATGCACCTGGAC          | GTA AACGACGGCCAGT |
| 305 | 79                    | PTPRD-14a | PTPRD | 14   | CCDS43786.1, CCDS6472.1 | NM_002839, NM_130391 | M13-GAGTGGAACCTCCCTCATTTGG      | GCTGGAACAATAAGCTGCCTCC         | GTA AACGACGGCCAGT |
| 306 | 79                    | PTPRD-14b | PTPRD | 14   | CCDS43786.1, CCDS6472.1 | NM_002839, NM_130391 | TCTTATTCAGTGGCACCCCTCC          | M13-AAGGCCGTAAGCAGACAAATC      | GTA AACGACGGCCAGT |
| 307 | 79                    | PTPRD-14c | PTPRD | 14   | CCDS43786.1, CCDS6472.1 | NM_002839, NM_130391 | AGAAGGCACCACTTCAACCTC           | M13-AGCCAGACTTGCTTGACATTC      | GTA AACGACGGCCAGT |
| 308 | 79                    | PTPRD-15  | PTPRD | 15   | CCDS43786.1, CCDS6472.1 | NM_002839, NM_130391 | CTATGGTCCATGGTGAAAAGG           | M13-CAAAGCACCAAAGTGTCTCCC      | GTA AACGACGGCCAGT |
| 309 | 79                    | PTPRD-16  | PTPRD | 16   | CCDS43786.1, CCDS6472.1 | NM_002839, NM_130391 | AAAGCTAGTGCACATTTGGTTTAGA       | M13-TCTGAGCAGAAGAATCTTCACTACAT | GTA AACGACGGCCAGT |
| 310 | 79                    | PTPRD-17  | PTPRD | 17   | CCDS43786.1, CCDS6472.1 | NM_002839, NM_130391 | M13-TTCAACCTCATTGGTCTGTGG       | GCTAGGTATGGAGAAGCCAGC          | GTA AACGACGGCCAGT |
| 311 | 79                    | PTPRD-18  | PTPRD | 18   | CCDS43786.1, CCDS6472.1 | NM_002839, NM_130391 | CCAGTATCTTACCTCTACCTTAACAGG     | M13-GATGGATATACCCACAATCCC      | GTA AACGACGGCCAGT |
| 312 | 79                    | PTPRD-19  | PTPRD | 19   | CCDS43786.1, CCDS6472.1 | NM_002839, NM_130391 | TGCATCACACACTTATCATTAAATCC      | M13-TCAACCACCTAAGGACAGCAG      | GTA AACGACGGCCAGT |
| 313 | 79                    | PTPRD-20  | PTPRD | 20   | CCDS43786.1, CCDS6472.1 | NM_002839, NM_130391 | M13-GAGTGCAGGTGCAATTCTCTG       | TTTGCTTGGCAAGTCTCC             | GTA AACGACGGCCAGT |
| 314 | 79                    | PTPRD-21  | PTPRD | 21   | CCDS43786.1, CCDS6472.1 | NM_002839, NM_130391 | M13-TATTTGCTGCTTCTCACCT         | TTACTATATTGCTTGTGCAGACACTTT    | GTA AACGACGGCCAGT |
| 315 | 79                    | PTPRD-22  | PTPRD | 22   | CCDS43786.1, CCDS6472.1 | NM_002839, NM_130391 | M13-CAGCTTACAGTTAGGATCATCTTG    | CCACCATGCACAGCCATC             | GTA AACGACGGCCAGT |
| 316 | 79                    | PTPRD-23  | PTPRD | 23   | CCDS43786.1, CCDS6472.1 | NM_002839, NM_130391 | M13-CCATTAGGTCATGTCCCAGG        | AGAAAGATAAGCCTTAGGGAAGG        | GTA AACGACGGCCAGT |
| 317 | 79                    | PTPRD-24  | PTPRD | 24   | CCDS43786.1, CCDS6472.1 | NM_002839, NM_130391 | M13-CCTTCAACAGCAACTCAAAGC       | TGGAAGATCTATTTCACTTCACTG       | GTA AACGACGGCCAGT |
| 318 | 79                    | PTPRD-25  | PTPRD | 25   | CCDS43786.1, CCDS6472.1 | NM_002839, NM_130391 | CCAAGGCTACAGGGTGGTAG            | M13-TTAGCATAGGCTCATTTGACC      | GTA AACGACGGCCAGT |
| 319 | 79                    | PTPRD-26  | PTPRD | 26   | CCDS43786.1, CCDS6472.1 | NM_002839, NM_130391 | M13-TTTGAGTAGAAGTAATGGATGAAGGTC | GGTTAAAGTAAAGCCAGACTCAA        | GTA AACGACGGCCAGT |
| 320 | 79                    | PTPRD-27  | PTPRD | 27   | CCDS43786.1, CCDS6472.1 | NM_002839, NM_130391 | GGGTACACTGCATTCAAAGTGT          | M13-CAAAGGACTAAATGATGACCT      | GTA AACGACGGCCAGT |

|     | # of Tumors sequenced | Primer   | Gene  | Exon | CCDS accession          | Ref Seq accession    | Forward Primer                | Reverse Primer              | Sequencing Primer |
|-----|-----------------------|----------|-------|------|-------------------------|----------------------|-------------------------------|-----------------------------|-------------------|
| 321 | 79                    | PTPRD-28 | PTPRD | 28   | CCDS43786.1, CCDS6472.1 | NM_002839, NM_130391 | M13-GGTTGATGTTTATGTATCCAGTGTG | GATGGTCCGATTATGTCCAG        | GTA AACGACGGCCAGT |
| 322 | 79                    | PTPRD-29 | PTPRD | 29   | CCDS43786.1, CCDS6472.1 | NM_002839, NM_130391 | M13-ATGAAGGGAGCTCATGGTTTC     | GTCAAGTGCCAAGTCTTCTC        | GTA AACGACGGCCAGT |
| 323 | 79                    | PTPRD-30 | PTPRD | 30   | CCDS43786.1, CCDS6472.1 | NM_002839, NM_130391 | M13-TTCTTGTGGTCCGTATGCTTG     | TGGTAATTTGGTTTGTCTAATAGGAAG | GTA AACGACGGCCAGT |
| 324 | 79                    | PTPRD-31 | PTPRD | 31   | CCDS43786.1, CCDS6472.1 | NM_002839, NM_130391 | M13-GAAGTATGTCCACACCCAAGC     | TGTTGAGAGATATGGAGTCCG       | GTA AACGACGGCCAGT |
| 325 | 79                    | PTPRD-32 | PTPRD | 32   | CCDS43786.1, CCDS6472.1 | NM_002839, NM_130391 | TTGGCAAAGTTAATCAACACCC        | M13-TGCCCTGTATGGCTCAGAAG    | GTA AACGACGGCCAGT |
| 326 | 79                    | PTPRE-1  | PTPRE | 1    | CCDS7657.1              | NM_006504            | TCTCCTCATCACTGCCTG            | M13-TTCAGCCACACCATTCTTCTC   | GTA AACGACGGCCAGT |
| 327 | 79                    | PTPRE-2  | PTPRE | 2    | CCDS7657.1              | NM_006504            | M13-AGGAAGAAGGGCTTATGGAGG     | GGCACAGTGATACCCACCAG        | GTA AACGACGGCCAGT |
| 328 | 79                    | PTPRE-3  | PTPRE | 3    | CCDS7657.1              | NM_006504            | M13-ACCTGGTGGGTATCACTGTGC     | CTCAAACGTCCATGTACACC        | GTA AACGACGGCCAGT |
| 329 | 79                    | PTPRE-4  | PTPRE | 4    | CCDS7657.1              | NM_006504            | M13-TCAGCTTGGTACTCAGTCGC      | GCAAGGGTTCTGAGTCTTTGG       | GTA AACGACGGCCAGT |
| 330 | 79                    | PTPRE-5  | PTPRE | 5    | CCDS7657.1              | NM_006504            | M13-GGACAGCAGGTAGTTTGTCTCC    | GTCCTAGGTGCAATGCTGAG        | GTA AACGACGGCCAGT |
| 331 | 79                    | PTPRE-6  | PTPRE | 6    | CCDS7657.1              | NM_006504            | GCTGAAATCCTACCCTGTGCG         | M13-TGTGACAATTTCACTCCGGG    | GTA AACGACGGCCAGT |
| 332 | 79                    | PTPRE-7  | PTPRE | 7    | CCDS7657.1              | NM_006504            | GTGAGTCTGGGAAAGTTTGG          | M13-TAAGTCTTGGTCTTGTGGC     | GTA AACGACGGCCAGT |
| 333 | 79                    | PTPRE-8  | PTPRE | 8    | CCDS7657.1              | NM_006504            | M13-GCCTGAGAAGGGAGTGAACAG     | TAAGCCACTGCATGTGTTTGG       | GTA AACGACGGCCAGT |
| 334 | 79                    | PTPRE-9  | PTPRE | 9    | CCDS7657.1              | NM_006504            | M13-GAGGCCCTTCTGTAGTTGGGTG    | GTCTGCCTATCACGCCTGG         | GTA AACGACGGCCAGT |
| 335 | 79                    | PTPRE-10 | PTPRE | 10   | CCDS7657.1              | NM_006504            | M13-AGCAGCACATGTTCCAGAGTCG    | CATTGCCATGAGGATGAG          | GTA AACGACGGCCAGT |
| 336 | 79                    | PTPRE-11 | PTPRE | 11   | CCDS7657.1              | NM_006504            | M13-AAAGTTGCATCCAGTGACCTG     | AAAGATGAGGACGAGGGAGTC       | GTA AACGACGGCCAGT |
| 337 | 79                    | PTPRE-12 | PTPRE | 12   | CCDS7657.1              | NM_006504            | CTCTGACTCTTGCCTCACACC         | M13-AATCATGGCTCAGGTATTGCC   | GTA AACGACGGCCAGT |
| 338 | 79                    | PTPRE-13 | PTPRE | 13   | CCDS7657.1              | NM_006504            | M13-GAGTGGTTTCTTTGAGCAGG      | ACAGCACACAGGAGCCCTTAG       | GTA AACGACGGCCAGT |
| 339 | 79                    | PTPRE-14 | PTPRE | 14   | CCDS7657.1              | NM_006504            | M13-TTTGCAAGCTTGTAGCAATGG     | AGGTGTGAGCCATCGTGC          | GTA AACGACGGCCAGT |
| 340 | 79                    | PTPRE-15 | PTPRE | 15   | CCDS7657.1              | NM_006504            | M13-TCATTAGGCCTTAGGCTGTCC     | GGGACATTTGTAATGAACGGG       | GTA AACGACGGCCAGT |
| 341 | 79                    | PTPRE-16 | PTPRE | 16   | CCDS7657.1              | NM_006504            | GGTCAACAAGCATTAAACAGGC        | M13-AGCCAATGGGACTAGGTGAAG   | GTA AACGACGGCCAGT |
| 342 | 79                    | PTPRE-17 | PTPRE | 17   | CCDS7657.1              | NM_006504            | M13-TAGGACAAGCAGGTTTCAGCC     | CACAGCTGCGGGTACTGG          | GTA AACGACGGCCAGT |
| 343 | 79                    | PTPRE-18 | PTPRE | 18   | CCDS7657.1              | NM_006504            | M13-CTTCAGTGCTGATATGCAGGG     | TTTACTGCGAAACATTGCAGC       | GTA AACGACGGCCAGT |
| 344 | 79                    | PTPRE-19 | PTPRE | 19   | CCDS7657.1              | NM_006504            | M13-GGAATCTGCATGTGCCTAAA      | CAACTGTATAGCAGGTGGCCTT      | GTA AACGACGGCCAGT |
| 345 | 79                    | PTPRH-1  | PTPRH | 1    | CCDS7657.1              | NM_006504            | M13-CTGGTTCCACTTCTCCTC        | CTGAAGCCCTTCTTCTCTCC        | GTA AACGACGGCCAGT |
| 346 | 79                    | PTPRH-2  | PTPRH | 2    | CCDS7657.1              | NM_006504            | M13-CTCCTCGACCAGGAAAAGAC      | TCAGTACAATCCCTCCCAACC       | GTA AACGACGGCCAGT |
| 347 | 79                    | PTPRH-3  | PTPRH | 3    | CCDS7657.1              | NM_006504            | M13-TTTATGAGCGCGTGTGTTTC      | TCCAACATAAAGAACCTGTCCG      | GTA AACGACGGCCAGT |
| 348 | 79                    | PTPRH-4  | PTPRH | 4    | CCDS7657.1              | NM_006504            | M13-GGTTAAGGAAGGGCTGAAAAG     | GAAATCCGCTACGTTCTCTG        | GTA AACGACGGCCAGT |
| 349 | 79                    | PTPRH-5  | PTPRH | 5    | CCDS7657.1              | NM_006504            | GCTGTGGTGAGCCGAGAT            | M13-GTCAGCTCCCAACCACCC      | GTA AACGACGGCCAGT |
| 350 | 79                    | PTPRH-6  | PTPRH | 6    | CCDS7657.1              | NM_006504            | M13-CTGCTGGATGCAATGGTTAAG     | CATCTCTGAGCTGAGACTGC        | GTA AACGACGGCCAGT |
| 351 | 79                    | PTPRH-7  | PTPRH | 7    | CCDS7657.1              | NM_006504            | M13-AGCTAAGATGGTTGAGGGCAG     | TACAGAGCCAGAGCCAGAAG        | GTA AACGACGGCCAGT |
| 352 | 79                    | PTPRH-8  | PTPRH | 8    | CCDS7657.1              | NM_006504            | M13-AGGGCGTATCACTGTGTTCTG     | AGCTCCCAAAGTCTTTTCATC       | GTA AACGACGGCCAGT |
| 353 | 79                    | PTPRH-9  | PTPRH | 9    | CCDS7657.1              | NM_006504            | M13-GGATATCTCAGCTTTGCTGTGG    | TCATCTCAGCTCGCAAGG          | GTA AACGACGGCCAGT |
| 354 | 79                    | PTPRH-10 | PTPRH | 10   | CCDS7657.1              | NM_006504            | M13-AGGTAGTTTGATTTGGCGAG      | CCACTGATTTCTCACAATGG        | GTA AACGACGGCCAGT |
| 355 | 79                    | PTPRH-11 | PTPRH | 11   | CCDS7657.1              | NM_006504            | M13-GTCAGCTGCTTTGGACCAGG      | TCCCTGAGTTCTGTTTCTGC        | GTA AACGACGGCCAGT |
| 356 | 79                    | PTPRH-12 | PTPRH | 12   | CCDS7657.1              | NM_006504            | M13-TCCTCCTGTTTCTCATCCTCG     | ATCCACCTCTGACCTAGCTG        | GTA AACGACGGCCAGT |

|     | # of Tumors sequenced | Primer    | Gene  | Exon | CCDS accession | Ref Seq accession | Forward Primer              | Reverse Primer              | Sequencing Primer |
|-----|-----------------------|-----------|-------|------|----------------|-------------------|-----------------------------|-----------------------------|-------------------|
| 357 | 79                    | PTPRH-13  | PTPRH | 13   | CCDS7657.1     | NM_006504         | M13-GGACTACAGGCGTGCAACAC    | TTTGCTTAATCCCGAAAGCC        | GTA AACGACGGCCAGT |
| 358 | 79                    | PTPRH-14  | PTPRH | 14   | CCDS7657.1     | NM_006504         | M13-GGGTGCCATATAATCTCAGGG   | AGGACTTGTTCCTCAAAGCGG       | GTA AACGACGGCCAGT |
| 359 | 79                    | PTPRH-15  | PTPRH | 15   | CCDS7657.1     | NM_006504         | TCCATGGGTCTTGGTCTTGTC       | M13-CAGAGACCTGGTTGAGGAAG    | GTA AACGACGGCCAGT |
| 360 | 79                    | PTPRH-16a | PTPRH | 16   | CCDS7657.1     | NM_006504         | GCACGCTGGAGAGATAAGAG        | M13-TGGAGGAATCCGTAAGGTCTG   | GTA AACGACGGCCAGT |
| 361 | 79                    | PTPRH-16b | PTPRH | 16   | CCDS7657.1     | NM_006504         | M13-GCACGCTGGAGAGATAAGAG    | TGGAGGAATCCGTAAGGTCTG       | GTA AACGACGGCCAGT |
| 362 | 79                    | PTPRH-17  | PTPRH | 17   | CCDS7657.1     | NM_006504         | M13-CATCTGCTGGTTCACATTTGG   | GGAGGACCTGGCTTCTAGCAC       | GTA AACGACGGCCAGT |
| 363 | 79                    | PTPRH-18  | PTPRH | 18   | CCDS7657.1     | NM_006504         | M13-ACCTTCCACCCACTCCTCTG    | CAGGGTCCCGTCTAACACAAC       | GTA AACGACGGCCAGT |
| 364 | 79                    | PTPRH-19  | PTPRH | 19   | CCDS7657.1     | NM_006504         | M13-ACACAGATCCCTCCAATCAGC   | GGAATACGTACTGAGCCTGGG       | GTA AACGACGGCCAGT |
| 365 | 79                    | PTPRH-20  | PTPRH | 20   | CCDS7657.1     | NM_006504         | AGTCCCTCAGCAACACAGGAC       | M13-CAGGAATCTGGGCTCAAGTG    | GTA AACGACGGCCAGT |
| 366 | 79                    | PTPRJ-1   | PTPRJ | 1    | CCDS7945.1     | NM_002843         | AGGAGGAGGCGAAGGAGAC         | M13-GGGCAGGTGCAGTCAATG      | GTA AACGACGGCCAGT |
| 367 | 79                    | PTPRJ-2   | PTPRJ | 2    | CCDS7945.1     | NM_002843         | M13-GCTTAATGTGCTTCTTACCACCC | CTACAGAGCGAGGCTCCAAC        | GTA AACGACGGCCAGT |
| 368 | 79                    | PTPRJ-3   | PTPRJ | 3    | CCDS7945.1     | NM_002843         | M13-CCAAGTGTGCATTTCA        | CAAGTGATCAATGGTTATCTCCAG    | GTA AACGACGGCCAGT |
| 369 | 79                    | PTPRJ-4   | PTPRJ | 4    | CCDS7945.1     | NM_002843         | TGGTGCAGGGAAGTCTAGGAG       | M13-TTCCACAGGCAACTTGAAC     | GTA AACGACGGCCAGT |
| 370 | 79                    | PTPRJ-5   | PTPRJ | 5    | CCDS7945.1     | NM_002843         | GCTCCAGCACTGAACCC           | M13-CTCCATACACATGGAAGCAAT   | GTA AACGACGGCCAGT |
| 371 | 79                    | PTPRJ-6   | PTPRJ | 6    | CCDS7945.1     | NM_002843         | GGGAGCAGATATTGATGGAGC       | M13-TCACTCAGAATCAGAATCACAGG | GTA AACGACGGCCAGT |
| 372 | 79                    | PTPRJ-7   | PTPRJ | 7    | CCDS7945.1     | NM_002843         | M13-AGAGGAGGAAGAACTCC       | ACATCATGCATCCTGTGTCTG       | GTA AACGACGGCCAGT |
| 373 | 79                    | PTPRJ-8   | PTPRJ | 8    | CCDS7945.1     | NM_002843         | M13-GAGAGAGGGATCAGGTGCCT    | ATCTCTGCTTGTGTTTCCA         | GTA AACGACGGCCAGT |
| 374 | 79                    | PTPRJ-9   | PTPRJ | 9    | CCDS7945.1     | NM_002843         | M13-CTCGACAGCACTTGAGAGAG    | CTGGCCATCATTTAACAGTG        | GTA AACGACGGCCAGT |
| 375 | 79                    | PTPRJ-10  | PTPRJ | 10   | CCDS7945.1     | NM_002843         | M13-ctcgaaggtcagcaccact     | tcttgaattcactaatctgtgc      | GTA AACGACGGCCAGT |
| 376 | 79                    | PTPRJ-11  | PTPRJ | 11   | CCDS7945.1     | NM_002843         | M13-CCCAGGATTCTGCTACTCCC    | GTCCACACGTGCAGACCC          | GTA AACGACGGCCAGT |
| 377 | 79                    | PTPRJ-12  | PTPRJ | 12   | CCDS7945.1     | NM_002843         | M13-CTCTGCTCCTCACCAGTTCC    | TTACTCACATGCCTCAGTGGG       | GTA AACGACGGCCAGT |
| 378 | 79                    | PTPRJ-13  | PTPRJ | 13   | CCDS7945.1     | NM_002843         | CCCAACATCACCACCATGTAG       | M13-GTCCCTGAGACGTGTCTGACC   | GTA AACGACGGCCAGT |
| 379 | 79                    | PTPRJ-14  | PTPRJ | 14   | CCDS7945.1     | NM_002843         | TTACAATGGGAAGCTGGAACC       | M13-CACAGCTGGCCTTCTATGGAC   | GTA AACGACGGCCAGT |
| 380 | 79                    | PTPRJ-15  | PTPRJ | 15   | CCDS7945.1     | NM_002843         | TCTCTGGTGTAGGGTCCCAG        | M13-GCCAAATGCAGAACACTATGG   | GTA AACGACGGCCAGT |
| 381 | 79                    | PTPRJ-16  | PTPRJ | 16   | CCDS7945.1     | NM_002843         | M13-AATTAGCATTTGCAGCTTGGG   | AAACTTCCAGATGGTCATGGTC      | GTA AACGACGGCCAGT |
| 382 | 79                    | PTPRJ-17  | PTPRJ | 17   | CCDS7945.1     | NM_002843         | M13-CCCTCTTGCCAAATTATACCC   | CTCTGCGAACCCACAGTTG         | GTA AACGACGGCCAGT |
| 383 | 79                    | PTPRJ-18  | PTPRJ | 18   | CCDS7945.1     | NM_002843         | CCCTCTTGCCAAATTATACCC       | M13-TTCTTTAGCTACCTGCCACC    | GTA AACGACGGCCAGT |
| 384 | 79                    | PTPRJ-19  | PTPRJ | 19   | CCDS7945.1     | NM_002843         | M13-TCTATGGAGCTGTTGGGCTG    | AATGAATGGTTGTGGAAGTGG       | GTA AACGACGGCCAGT |
| 385 | 79                    | PTPRJ-20  | PTPRJ | 20   | CCDS7945.1     | NM_002843         | ATGTGACTTCTCTGTGCCACG       | M13-GGGAAACAGCACATAGTCAACC  | GTA AACGACGGCCAGT |
| 386 | 79                    | PTPRJ-21  | PTPRJ | 21   | CCDS7945.1     | NM_002843         | M13-TTCGATGAAATCTTCAAGTGTGC | CCAGCAGCAACGTAATAAACAG      | GTA AACGACGGCCAGT |
| 387 | 79                    | PTPRJ-22  | PTPRJ | 22   | CCDS7945.1     | NM_002843         | M13-TAGCCAGTCTCCCTGTGAGG    | TCCCAAGAAAGTAAATTTCCAG      | GTA AACGACGGCCAGT |
| 388 | 79                    | PTPRJ-23  | PTPRJ | 23   | CCDS7945.1     | NM_002843         | M13-GCACTTTATCAGCTGTGTGC    | ACATTCCTCTTAGGCTTTGC        | GTA AACGACGGCCAGT |
| 389 | 79                    | PTPRJ-24  | PTPRJ | 24   | CCDS7945.1     | NM_002843         | M13-TGTGACAGTGAAGGAAAGCAAG  | ATTAGCTGGGCATGGTGTG         | GTA AACGACGGCCAGT |
| 390 | 79                    | PTPRJ-25  | PTPRJ | 25   | CCDS7945.1     | NM_002843         | GCTTGAACCGTTTGTGTTG         | M13-ATATGCAGCTTCTATGCCCTC   | GTA AACGACGGCCAGT |
| 391 | 79                    | PTPRN-1   | PTPRN | 1    | CCDS2440.1     | NM_002846         | M13-ACGCAAATTAGCTTACGAGCC   | TCATGACATTTACCCTCAC         | GTA AACGACGGCCAGT |
| 392 | 79                    | PTPRN-2   | PTPRN | 2    | CCDS2440.1     | NM_002846         | M13-CAGGCCTGATTCTACTCTCC    | CCCAGTAGCCCTTCTCTTTC        | GTA AACGACGGCCAGT |
| 393 | 79                    | PTPRN-3   | PTPRN | 3    | CCDS2440.1     | NM_002846         | M13-GAAGAAGGAAGACTTGCTGG    | CAAGATATGGGAAGGTGAGGC       | GTA AACGACGGCCAGT |

|     | # of Tumors sequenced | Primer    | Gene   | Exon | CCDS accession | Ref Seq accession | Forward Primer             | Reverse Primer             | Sequencing Primer |
|-----|-----------------------|-----------|--------|------|----------------|-------------------|----------------------------|----------------------------|-------------------|
| 394 | 79                    | PTPRN-4   | PTPRN  | 4    | CCDS2440.1     | NM_002846         | M13-TCACCCACTGAGTTTGTCCC   | CCATTCTGCACCTCTTTACC       | GTA AACGACGGCCAGT |
| 395 | 79                    | PTPRN-5   | PTPRN  | 5    | CCDS2440.1     | NM_002846         | CCC GAATAGTTCTGCCTTGC      | M13-CTGAGACCCTGGAGCCATC    | GTA AACGACGGCCAGT |
| 396 | 79                    | PTPRN-6   | PTPRN  | 6    | CCDS2440.1     | NM_002846         | M13-CCTGTTCCACCAGGTAAGTCC  | GCATAGATTGCAGGGAAGGG       | GTA AACGACGGCCAGT |
| 397 | 79                    | PTPRN-7   | PTPRN  | 7    | CCDS2440.1     | NM_002846         | M13-TCACTCACTCATCTGCATCCC  | CCTGAAGCCTGACTCTTCTC       | GTA AACGACGGCCAGT |
| 398 | 79                    | PTPRN-8   | PTPRN  | 8    | CCDS2440.1     | NM_002846         | M13-CCAGGCTTAGGATGAGACCAG  | ACCTTAGGCAATAACTTGCGG      | GTA AACGACGGCCAGT |
| 399 | 79                    | PTPRN-9   | PTPRN  | 9    | CCDS2440.1     | NM_002846         | M13-GGTGTCCTCTCTGTACCCAGC  | GGATTCTGCCCCTCTGCTTC       | GTA AACGACGGCCAGT |
| 400 | 79                    | PTPRN-10a | PTPRN  | 10   | CCDS2440.1     | NM_002846         | M13-AGAAGCAGAGGGCAGAAATCC  | TTCAGTACAGCTGGGAGCATC      | GTA AACGACGGCCAGT |
| 401 | 79                    | PTPRN-10b | PTPRN  | 10   | CCDS2440.1     | NM_002846         | M13-GCC CAGCAGCAGAGGAAT    | CAGGCGCTCCTTGTCTTG         | GTA AACGACGGCCAGT |
| 402 | 79                    | PTPRN-11  | PTPRN  | 11   | CCDS2440.1     | NM_002846         | M13-CTTCTTGCCTAAGATGCC     | GGTCTCCATCCTGTCTTGC        | GTA AACGACGGCCAGT |
| 403 | 79                    | PTPRN-12a | PTPRN  | 12   | CCDS2440.1     | NM_002846         | TATCTCTGCACCTCAATCCC       | M13-CCATCTGCTGGTGAGAAAGAG  | GTA AACGACGGCCAGT |
| 404 | 79                    | PTPRN-12b | PTPRN  | 12   | CCDS2440.1     | NM_002846         | M13-CCTGTCTTTGGCTGATGTGA   | AACTGGGAGGACACTGCT         | GTA AACGACGGCCAGT |
| 405 | 79                    | PTPRN-13a | PTPRN  | 13   | CCDS2440.1     | NM_002846         | M13-CTAATCTCCCAGCTTGGCC    | CCATT CAGTCCGACCCTTAG      | GTA AACGACGGCCAGT |
| 406 | 79                    | PTPRN-13b | PTPRN  | 13   | CCDS2440.1     | NM_002846         | M13-CTCAGTGTGCTCACTCTGG    | GATGCCGGTCTTTTTGATG        | GTA AACGACGGCCAGT |
| 407 | 79                    | PTPRN-14  | PTPRN  | 14   | CCDS2440.1     | NM_002846         | M13-AGCCTAGGAGCCAGAGTTG    | GATCCTCCATGTATGCCTGTG      | GTA AACGACGGCCAGT |
| 408 | 79                    | PTPRN-15a | PTPRN  | 15   | CCDS2440.1     | NM_002846         | M13-GTGAAGGAATGGGATGGTGAG  | GATGTAATCGCTCCGAGAAGG      | GTA AACGACGGCCAGT |
| 409 | 79                    | PTPRN-15b | PTPRN  | 15   | CCDS2440.1     | NM_002846         | M13-CAGTGTGCTCCAGTTCA      | CACACTGCTTGACACCATCC       | GTA AACGACGGCCAGT |
| 410 | 79                    | PTPRN-16  | PTPRN  | 16   | CCDS2440.1     | NM_002846         | CTGACTTCTGCCCTGTGAG        | M13-CCTTGCTAGGATATCAGGCC   | GTA AACGACGGCCAGT |
| 411 | 79                    | PTPRN-17a | PTPRN  | 17   | CCDS2440.1     | NM_002846         | M13-CTGACCCACTTGCTCTGACC   | ATACGTGGTAGAGGGAGGCAC      | GTA AACGACGGCCAGT |
| 412 | 79                    | PTPRN-17b | PTPRN  | 16   | CCDS2440.1     | NM_002846         | M13-CCTACCAAGCAGAGCCAAC    | GGTCTGCACGTTCTCAGGT        | GTA AACGACGGCCAGT |
| 413 | 79                    | PTPRN-18  | PTPRN  | 18   | CCDS2440.1     | NM_002846         | M13-CAGGTGGGCTCTTAAAGGGAG  | TGTATGAATCATGAGCAGGGC      | GTA AACGACGGCCAGT |
| 414 | 79                    | PTPRN-19  | PTPRN  | 19   | CCDS2440.1     | NM_002846         | GTGGTTGGAGAGCCGAGAAG       | M13-CCAGAAGTCAGAGGCCGAG    | GTA AACGACGGCCAGT |
| 415 | 79                    | PTPRN-20  | PTPRN  | 20   | CCDS2440.1     | NM_002846         | M13-TCTCCAACCATCTTCCCTCTC  | GTGCTGGATTTGACTATGCC       | GTA AACGACGGCCAGT |
| 416 | 79                    | PTPRN-21  | PTPRN  | 21   | CCDS2440.1     | NM_002846         | ATGAGCTTTCCTTCATCCTCG      | M13-GACAACCTGCTCCTTCTGAGC  | GTA AACGACGGCCAGT |
| 417 | 79                    | PTPRN-22a | PTPRN  | 22   | CCDS2440.1     | NM_002846         | M13-CAAGGCTCTTGCCTCCAG     | GTAGATGGTCATGGAGAGGG       | GTA AACGACGGCCAGT |
| 418 | 79                    | PTPRN-22b | PTPRN  | 22   | CCDS2440.1     | NM_002846         | GAAGGTGAACAAGTGTACCG       | M13-GGCTTCCCTTCTGACTCT     | GTA AACGACGGCCAGT |
| 419 | 79                    | PTPRN-23  | PTPRN  | 23   | CCDS2440.1     | NM_002846         | ACCTTCCCACCTGCTTCTG        | M13-CTTCTGGCTTCCCTTCTG     | GTA AACGACGGCCAGT |
| 420 | 79                    | PTPRN2-2  | PTPRN2 | 2    | CCDS5947.1     | NM_002847         | M13-TCTGGCTTCAAGAATAATCGGC | TTCCATCCGCCTCCTCTC         | GTA AACGACGGCCAGT |
| 421 | 79                    | PTPRN2-3  | PTPRN2 | 3    | CCDS5947.1     | NM_002847         | M13-CATTGCAAGGACGTGTGTGAC  | GACGATCCAGTAGGAAGCAC       | GTA AACGACGGCCAGT |
| 422 | 79                    | PTPRN2-4  | PTPRN2 | 4    | CCDS5947.1     | NM_002847         | M13-TGAGAGGGAGGCTTACTTTGC  | AGAAAGATGGTGGGTGCTTTG      | GTA AACGACGGCCAGT |
| 423 | 79                    | PTPRN2-5  | PTPRN2 | 5    | CCDS5947.1     | NM_002847         | M13-CATGGTCATGGAGCAGCAAG   | GACTAAGGAAACATGCCAGG       | GTA AACGACGGCCAGT |
| 424 | 79                    | PTPRN2-6  | PTPRN2 | 6    | CCDS5947.1     | NM_002847         | CGATGGAAATGTGACTCTTGC      | M13-AAGAGCATGGTGCCTGTGC    | GTA AACGACGGCCAGT |
| 425 | 79                    | PTPRN2-7  | PTPRN2 | 7    | CCDS5947.1     | NM_002847         | ACAGGGTCAGGTGGATTGAG       | M13-CAC TTGGT GAGCCAGCAGTC | GTA AACGACGGCCAGT |
| 426 | 79                    | PTPRN2-8  | PTPRN2 | 8    | CCDS5947.1     | NM_002847         | M13-CCTCACCTTTCGTATGGAGG   | TCTTTGCATTTACCAGACTTTC     | GTA AACGACGGCCAGT |
| 427 | 79                    | PTPRN2-9a | PTPRN2 | 9    | CCDS5947.1     | NM_002847         | M13-ATAGACTGCACACTTCGCC    | CACACAGGAGCTTAGCCAGG       | GTA AACGACGGCCAGT |
| 428 | 79                    | PTPRN2-9b | PTPRN2 | 9    | CCDS5947.1     | NM_002847         | M13-GTCAGTCCATCGTCTGAGTGC  | ATCAGGAGGAGCCACTGTCC       | GTA AACGACGGCCAGT |
| 429 | 79                    | PTPRN2-10 | PTPRN2 | 10   | CCDS5947.1     | NM_002847         | TTGTTGCTGAAACTCAGGTG       | M13-GCTGCTGAAATCACCTTTAC   | GTA AACGACGGCCAGT |
| 430 | 79                    | PTPRN2-11 | PTPRN2 | 11   | CCDS5947.1     | NM_002847         | M13-AATGGAACAAAGGTCATGGTG  | GTGAGTCTCTCTGCCTTGG        | GTA AACGACGGCCAGT |

|     | # of Tumors sequenced | Primer    | Gene   | Exon | CCDS accession | Ref Seq accession | Forward Primer                  | Reverse Primer                  | Sequencing Primer |
|-----|-----------------------|-----------|--------|------|----------------|-------------------|---------------------------------|---------------------------------|-------------------|
| 431 | 79                    | PTPRN2-12 | PTPRN2 | 12   | CCDS5947.1     | NM_002847         | M13-TCCATTAAGGTAGGCGGGTGC       | ACCTTGGCTGAATTAACCTGC           | GTA AACGACGGCCAGT |
| 432 | 79                    | PTPRN2-13 | PTPRN2 | 13   | CCDS5947.1     | NM_002847         | AGTTGCATTGGAGACGTGTG            | M13-GATACAGGAACAACCTGCTGGG      | GTA AACGACGGCCAGT |
| 433 | 79                    | PTPRN2-14 | PTPRN2 | 14   | CCDS5947.1     | NM_002847         | M13-GCCTGAACCTTGGATCTTAGC       | CAGATGCTGGGTGTTGCAG             | GTA AACGACGGCCAGT |
| 434 | 79                    | PTPRN2-15 | PTPRN2 | 15   | CCDS5947.1     | NM_002847         | M13-TTTCACCTAACGGTTGCATGG       | CTGGTACACACAGGTCAGCAC           | GTA AACGACGGCCAGT |
| 435 | 79                    | PTPRN2-16 | PTPRN2 | 16   | CCDS5947.1     | NM_002847         | CATTCAGAAGGGGTGAGCAG            | M13-AGAACCTTCCCACGTGATTTG       | GTA AACGACGGCCAGT |
| 436 | 79                    | PTPRN2-18 | PTPRN2 | 18   | CCDS5947.1     | NM_002847         | M13-GTGCATTAGAGATGCTCAGG        | TAACGAATCCCATTGCGAGG            | GTA AACGACGGCCAGT |
| 437 | 79                    | PTPRN2-19 | PTPRN2 | 19   | CCDS5947.1     | NM_002847         | M13-CTCAGTGCCTGAGGTTGCG         | AAATCGCTCACGATTAACACG           | GTA AACGACGGCCAGT |
| 438 | 79                    | PTPRN2-20 | PTPRN2 | 20   | CCDS5947.1     | NM_002847         | M13-TCAAACACACAGACCTTGCG        | AACGCCCAATTGTATTTACCC           | GTA AACGACGGCCAGT |
| 439 | 79                    | PTPRN2-21 | PTPRN2 | 21   | CCDS5947.1     | NM_002847         | M13-CATCCCACAAGCTACAAGCTG       | CTGCAAACCACCTTCTACG             | GTA AACGACGGCCAGT |
| 440 | 79                    | PTPRN2-22 | PTPRN2 | 22   | CCDS5947.1     | NM_002847         | M13-TGGCTAGCAGGAGATTGACAG       | TAGGACTTGAGATGTGGCTGC           | GTA AACGACGGCCAGT |
| 441 | 79                    | PTPRN2-23 | PTPRN2 | 23   | CCDS5947.1     | NM_002847         | AATTTCTTTCTGCGAAATGGC           | M13-TGACTACGGGAGAGCTAAGGG       | GTA AACGACGGCCAGT |
| 442 | 79                    | PTPRO-1   | PTPRO  | 1    | CCDS8675.1     | NM_030667         | M13-CAGTTCGCCATTGTGAGCC         | CCTCTCAAGACCACCAGGAAC           | GTA AACGACGGCCAGT |
| 443 | 79                    | PTPRO-2   | PTPRO  | 2    | CCDS8675.1     | NM_030667         | M13-TTTAAGAAATAAGGCTTACCATAAACA | GTGGAGTCTGTCAATTCGAGC           | GTA AACGACGGCCAGT |
| 444 | 79                    | PTPRO-3   | PTPRO  | 3    | CCDS8675.1     | NM_030667         | TGAGGAGTTTAGTGCCACAG            | M13-GAACCAGATGTTCTAGGCTTCC      | GTA AACGACGGCCAGT |
| 445 | 79                    | PTPRO-4   | PTPRO  | 4    | CCDS8675.1     | NM_030667         | M13-GCCATAATTGTTCAAACCTTTCCA    | GGGTAAGTCAGTTAATTATAACCTTTGG    | GTA AACGACGGCCAGT |
| 446 | 79                    | PTPRO-5a  | PTPRO  | 5    | CCDS8675.1     | NM_030667         | M13-TTTCGGTTCGTATCGTAAACTTG     | TCTGCTCTCAGTCTGCATTGG           | GTA AACGACGGCCAGT |
| 447 | 79                    | PTPRO-5b  | PTPRO  | 5    | CCDS8675.1     | NM_030667         | TTTCGGTTCGTATCGTAAACTTG         | M13-TCTGCTCTCAGTCTGCATTGG       | GTA AACGACGGCCAGT |
| 448 | 79                    | PTPRO-5c  | PTPRO  | 5    | CCDS8675.1     | NM_030667         | tgctgtgtacctgactcattaag         | M13-AAAGCAGTGGGTGGTTTGG         | GTA AACGACGGCCAGT |
| 449 | 79                    | PTPRO-6   | PTPRO  | 6    | CCDS8675.1     | NM_030667         | TTCATTAATCGACTTGTCTATACCCAG     | M13-TCTGAGCATCATTATCCCACC       | GTA AACGACGGCCAGT |
| 450 | 79                    | PTPRO-7   | PTPRO  | 7    | CCDS8675.1     | NM_030667         | GACCTGAAGAGTTGCCAGTCC           | M13-CTGGCTTCTACAATTGCCTC        | GTA AACGACGGCCAGT |
| 451 | 79                    | PTPRO-8   | PTPRO  | 8    | CCDS8675.1     | NM_030667         | M13-TTCTAGGTTCCCTTCAATGTTTCC    | TGATAATGATTTGAGCTCGCAC          | GTA AACGACGGCCAGT |
| 452 | 79                    | PTPRO-9   | PTPRO  | 9    | CCDS8675.1     | NM_030667         | M13-GAAGTTTGAGGCCATTGCTAA       | TGTA AATTGCTCAGTCTTGGCT         | GTA AACGACGGCCAGT |
| 453 | 79                    | PTPRO-10  | PTPRO  | 10   | CCDS8675.1     | NM_030667         | M13-AATAAGGACTGTTTCGATGTGT      | GGGTGAATGACTGGCATTTC            | GTA AACGACGGCCAGT |
| 454 | 79                    | PTPRO-11  | PTPRO  | 11   | CCDS8675.1     | NM_030667         | M13-GTTACCGGGACTATCGTGTGC       | TGACGTGCAATAAATGATTGCTTAG       | GTA AACGACGGCCAGT |
| 455 | 79                    | PTPRO-12  | PTPRO  | 12   | CCDS8675.1     | NM_030667         | M13-AACAGAGAGGGAATGTGTCTGC      | TGAATTGAGGAGCTCTTGTCTG          | GTA AACGACGGCCAGT |
| 456 | 79                    | PTPRO-13  | PTPRO  | 13   | CCDS8675.1     | NM_030667         | GCTCTTACCTACCTATATTTGAATTGG     | M13-TGCTGTTAATTTCTATCAGTGAAACAC | GTA AACGACGGCCAGT |
| 457 | 79                    | PTPRO-14  | PTPRO  | 14   | CCDS8675.1     | NM_030667         | M13-AAGGGAATTGGTCAGATGGG        | GAAGCTGGGATTTCTTGGTG            | GTA AACGACGGCCAGT |
| 458 | 79                    | PTPRO-15  | PTPRO  | 15   | CCDS8675.1     | NM_030667         | M13-ATCATCGTAAGCTCACTGCC        | TTTGTGTAACAAGCAATCCTTTG         | GTA AACGACGGCCAGT |
| 459 | 79                    | PTPRO-16a | PTPRO  | 16   | CCDS8675.1     | NM_030667         | M13-TTTAATGCTGTGATGATAAGCTGG    | CACCACTGTTTCAGTCCCTTG           | GTA AACGACGGCCAGT |
| 460 | 79                    | PTPRO-16b | PTPRO  | 16   | CCDS8675.1     | NM_030667         | TCTGCAGATGGCTAGGGAGT            | M13-CTGCAGCAAAGTGTGGGATA        | GTA AACGACGGCCAGT |
| 461 | 79                    | PTPRO-16c | PTPRO  | 16   | CCDS8675.1     | NM_030667         | M13-ggtctgtttggtccctgt          | cgctatacaacttaggtgtgcaa         | GTA AACGACGGCCAGT |
| 462 | 79                    | PTPRO-17  | PTPRO  | 17   | CCDS8675.1     | NM_030667         | GCAATGGGAAGTATAAAGTGACAG        | M13-GACAAGCAATCTTTAATTGGAACG    | GTA AACGACGGCCAGT |
| 463 | 79                    | PTPRO-18  | PTPRO  | 18   | CCDS8675.1     | NM_030667         | GAGATTTCTCCTATCAAGGAAGCTG       | M13-ACATGACCGCAACACAAACC        | GTA AACGACGGCCAGT |
| 464 | 79                    | PTPRO-19  | PTPRO  | 19   | CCDS8675.1     | NM_030667         | M13-GCAATGTCATATAGCAAAGGGC      | AATCTCAGACGTGGCCTTGAG           | GTA AACGACGGCCAGT |
| 465 | 79                    | PTPRO-20a | PTPRO  | 20   | CCDS8675.1     | NM_030667         | TTTCAAAGCAGGAGAGCTGG            | M13-TGTTTGACACATCCATATAGCCC     | GTA AACGACGGCCAGT |
| 466 | 79                    | PTPRO-20b | PTPRO  | 20   | CCDS8675.1     | NM_030667         | M13-CCGGTTCAACTGGATGACTT        | TGGTCACATTTACCCCTCCT            | GTA AACGACGGCCAGT |
| 467 | 79                    | PTPRO-21  | PTPRO  | 21   | CCDS8675.1     | NM_030667         | CATAGGTGTGTGATCCTTTGCC          | M13-ACAGCAAGCATTTCATCAACG       | GTA AACGACGGCCAGT |

|     | # of Tumors sequenced | Primer    | Gene  | Exon | CCDS accession | Ref Seq accession | Forward Primer             | Reverse Primer                | Sequencing Primer |
|-----|-----------------------|-----------|-------|------|----------------|-------------------|----------------------------|-------------------------------|-------------------|
| 468 | 79                    | PTPRO-22  | PTPRO | 22   | CCDS8675.1     | NM_030667         | M13-TGTTTCATCTTCACCACGGTC  | CGCTGGGTAGGGTCTCC             | GTA AACGACGGCCAGT |
| 469 | 79                    | PTPRO-23  | PTPRO | 23   | CCDS8675.1     | NM_030667         | TAGCAGAGTCTGGGTATCC        | M13-AAGGCTTATGGAATGGTGAG      | GTA AACGACGGCCAGT |
| 470 | 79                    | PTPRO-24  | PTPRO | 24   | CCDS8675.1     | NM_030667         | ACTTGAAGCCGAGAGGCAG        | M13-TTTGAAGCATATCATTTAATAATGG | GTA AACGACGGCCAGT |
| 471 | 79                    | PTPRO-25  | PTPRO | 25   | CCDS8675.1     | NM_030667         | AAGCCATGATGTTCTAAGCTCTG    | M13-TTTGTCCCATCCATCACATC      | GTA AACGACGGCCAGT |
| 472 | 79                    | PTPRS-1a  | PTPRS | 1    | CCDS12140.1    | NM_002850         | CTCCTCCATGAAGTCTCCTG       | M13-CACACACACAGCCATAAATGC     | GTA AACGACGGCCAGT |
| 473 | 79                    | PTPRS-1b  | PTPRS | 1    | CCDS12140.1    | NM_002850         | catcctggaatcggacagtg       | M13-caggagtcacagcacagcac      | GTA AACGACGGCCAGT |
| 474 | 79                    | PTPRS-2   | PTPRS | 2    | CCDS12140.1    | NM_002850         | ATCCTTGCTTTCTCCTCCTC       | M13-AACGTGTCCACGAAGTCCAC      | GTA AACGACGGCCAGT |
| 475 | 79                    | PTPRS-3a  | PTPRS | 3    | CCDS12140.1    | NM_002850         | TAGCCCAGCCTAGACAGGAAC      | M13-AACACAAAGCAGGAGGGTTTG     | GTA AACGACGGCCAGT |
| 476 | 79                    | PTPRS-3b  | PTPRS | 3    | CCDS12140.1    | NM_002850         | TCACAAACTGCAGCCTGAG        | M13-CACCGTGATTTGACGATGG       | GTA AACGACGGCCAGT |
| 477 | 79                    | PTPRS-4a  | PTPRS | 4    | CCDS12140.1    | NM_002850         | ACTGGCTGTAAGGATGGCAC       | M13-CTGTCTGTCTCCAGTAGTCCC     | GTA AACGACGGCCAGT |
| 478 | 79                    | PTPRS-4b  | PTPRS | 4    | CCDS12140.1    | NM_002850         | ACGTATGTGTTCCGGCTTG        | M13-AGGTGCGTGATGAGCTTCTT      | GTA AACGACGGCCAGT |
| 479 | 79                    | PTPRS-5   | PTPRS | 5    | CCDS12140.1    | NM_002850         | GCCAAGTAGGGCTTCCAG         | M13-AACTAAGGCCAGAGAGGGGAC     | GTA AACGACGGCCAGT |
| 480 | 79                    | PTPRS-6a  | PTPRS | 6    | CCDS12140.1    | NM_002850         | M13-TCTCCTCCGCATCTGTGTC    | CCCACCTGTGCCTGAAGTC           | GTA AACGACGGCCAGT |
| 481 | 79                    | PTPRS-6b  | PTPRS | 6    | CCDS12140.1    | NM_002850         | M13-GCCCAAGAACTCAAGGTGA    | GATCCATGCCTCTGGGCTA           | GTA AACGACGGCCAGT |
| 482 | 79                    | PTPRS-7a  | PTPRS | 7    | CCDS12140.1    | NM_002850         | CTGGGCCATAGTTTGTACCC       | M13-TCCGGTTCATGGTGTAGTAG      | GTA AACGACGGCCAGT |
| 483 | 79                    | PTPRS-7b  | PTPRS | 7    | CCDS12140.1    | NM_002850         | M13-TAAATCCAAGAGCCAAGACGG  | TAAAGCACCGTGCATAACCC          | GTA AACGACGGCCAGT |
| 484 | 79                    | PTPRS-8   | PTPRS | 8    | CCDS12140.1    | NM_002850         | M13-AGGTGGACAGGTGACAATGG   | GCAGCACACATAGGGACAAAG         | GTA AACGACGGCCAGT |
| 485 | 79                    | PTPRS-9   | PTPRS | 9    | CCDS12140.1    | NM_002850         | CCTCATCCCTCTCTGTCCC        | M13-GAACAAAGCGGAGACAGGC       | GTA AACGACGGCCAGT |
| 486 | 79                    | PTPRS-10  | PTPRS | 10   | CCDS12140.1    | NM_002850         | AGGGACTTGGGACAGGACAG       | M13-AAACTGAGCCTTAAGCCCTGC     | GTA AACGACGGCCAGT |
| 487 | 79                    | PTPRS-11  | PTPRS | 11   | CCDS12140.1    | NM_002850         | M13-GACTCATCTGGAGCTGGG     | GCATTGAATCTTGGATGACCC         | GTA AACGACGGCCAGT |
| 488 | 79                    | PTPRS-12  | PTPRS | 12   | CCDS12140.1    | NM_002850         | M13-GAGGCTGAGTCAGCAACTG    | GCCTCTGTAGCCGTGAGATG          | GTA AACGACGGCCAGT |
| 489 | 79                    | PTPRS-13  | PTPRS | 13   | CCDS12140.1    | NM_002850         | M13-GATCTGGAAGAGGTGAGGGC   | AGCTGCCTGTGACTGACCAC          | GTA AACGACGGCCAGT |
| 490 | 79                    | PTPRS-14  | PTPRS | 14   | CCDS12140.1    | NM_002850         | CACCAGGGTCAAGGTCTAGG       | M13-TCTCTGAGACAACCTCCTCCCTC   | GTA AACGACGGCCAGT |
| 491 | 79                    | PTPRS-15  | PTPRS | 15   | CCDS12140.1    | NM_002850         | TTCCAGAGGAGACCAAAGCTC      | M13-CCATGGACCCGTATGACTAGG     | GTA AACGACGGCCAGT |
| 492 | 79                    | PTPRS-16  | PTPRS | 16   | CCDS12140.1    | NM_002850         | M13-GAAACCCTAGTCATACGGGTCC | TGGAGGTATTTGGGAATCCAG         | GTA AACGACGGCCAGT |
| 493 | 79                    | PTPRS-17  | PTPRS | 17   | CCDS12140.1    | NM_002850         | CCTTCTAACACAGCTCACCC       | M13-GCTTGTCACTTCCAGGTTGG      | GTA AACGACGGCCAGT |
| 494 | 79                    | PTPRS-18a | PTPRS | 18   | CCDS12140.1    | NM_002850         | M13-TCTCCAGGAGTATGAGGTGAG  | TATCTAAAGATGCCAGTGCC          | GTA AACGACGGCCAGT |
| 495 | 79                    | PTPRS-18b | PTPRS | 18   | CCDS12140.1    | NM_002850         | M13-CCAAATGCCTCTGAACAAT    | ACACCATAGCCAGAAGTCC           | GTA AACGACGGCCAGT |
| 496 | 79                    | PTPRS-19  | PTPRS | 19   | CCDS12140.1    | NM_002850         | TGAAGTACACGTCCCATGGTC      | M13-GGCAAGAGAACAGGTGTCAGC     | GTA AACGACGGCCAGT |
| 497 | 79                    | PTPRS-20  | PTPRS | 20   | CCDS12140.1    | NM_002850         | M13-ACTTCTGGCGTATGGTGTGG   | TAGTCAGCCTGGGTAGACACG         | GTA AACGACGGCCAGT |
| 498 | 79                    | PTPRS-21  | PTPRS | 21   | CCDS12140.1    | NM_002850         | M13-GGCCACTTGGGCATCTTC     | ATGACGATAAAGCAGCCTGTG         | GTA AACGACGGCCAGT |
| 499 | 79                    | PTPRS-22  | PTPRS | 22   | CCDS12140.1    | NM_002850         | ACTGCAGGTACGTCCACCC        | M13-CTGCCACCCTTCTAGTCC        | GTA AACGACGGCCAGT |
| 500 | 79                    | PTPRS-23  | PTPRS | 23   | CCDS12140.1    | NM_002850         | M13-ACTAGAAGGTGGTGGCAGGG   | CAGCTCTGTCTCCACAAGAC          | GTA AACGACGGCCAGT |
| 501 | 79                    | PTPRS-24  | PTPRS | 24   | CCDS12140.1    | NM_002850         | M13-GTGTAGCTGTCACTGGCTTGG  | AAGTACTGGTAGCGGGCAGAG         | GTA AACGACGGCCAGT |
| 502 | 79                    | PTPRS-25  | PTPRS | 25   | CCDS12140.1    | NM_002850         | M13-CATGCTGTGGGAGAACAATTC  | TTGTATCCATCACCAACCAGG         | GTA AACGACGGCCAGT |
| 503 | 79                    | PTPRS-26  | PTPRS | 26   | CCDS12140.1    | NM_002850         | GGGTGAAGATAGGGAGGATGG      | M13-CTGATCTGACCACCCGATTC      | GTA AACGACGGCCAGT |
| 504 | 79                    | PTPRS-27  | PTPRS | 27   | CCDS12140.1    | NM_002850         | M13-CCCATCTGGGCTGTAGAGTC   | AGGTGGCTGTACCCATCTCAC         | GTA AACGACGGCCAGT |

|     | # of Tumors sequenced | Primer   | Gene  | Exon | CCDS accession | Ref Seq accession | Forward Primer             | Reverse Primer              | Sequencing Primer  |
|-----|-----------------------|----------|-------|------|----------------|-------------------|----------------------------|-----------------------------|--------------------|
| 505 | 79                    | PTPRS-28 | PTPRS | 28   | CCDS12140.1    | NM_002850         | M13-GCCAAAGAGACCTTCTGCAAG  | CTCGGAAATGGTGCAGAAAC        | GTA AACGACG GCCAGT |
| 506 | 79                    | PTPRT-1a | PTPRT | 1    | CCDS42874.1    | NM_007050         | M13-AGCCTCCC GCCTCAGTTC    | GAGCCACACA AACTTTCTCCTC     | GTA AACGACG GCCAGT |
| 507 | 79                    | PTPRT-1b | PTPRT | 1    | CCDS42874.1    | NM_007050         | M13-gttagactcggggagac      | gccacacaacttctcctc          | GTA AACGACG GCCAGT |
| 508 | 79                    | PTPRT-2  | PTPRT | 2    | CCDS42874.1    | NM_007050         | M13-AGCCGACGAGACAGAGGTAAC  | ATTCAGCCTTG GTTTGACCAC      | GTA AACGACG GCCAGT |
| 509 | 79                    | PTPRT-3  | PTPRT | 3    | CCDS42874.1    | NM_007050         | M13-CTTGATCTCTGGCCACTCCTC  | GACCTAGCACCTGTAGGAGAG       | GTA AACGACG GCCAGT |
| 510 | 79                    | PTPRT-4  | PTPRT | 4    | CCDS42874.1    | NM_007050         | CAGGGTAGCGTGCTGTCTTAAC     | M13-GAAGGGATTGCAGGCTCTATG   | GTA AACGACG GCCAGT |
| 511 | 79                    | PTPRT-5  | PTPRT | 5    | CCDS42874.1    | NM_007050         | TCTTAAGTGCCAGTTCACCC       | M13-CTTGTTGCCATAGAGCTGC     | GTA AACGACG GCCAGT |
| 512 | 79                    | PTPRT-6  | PTPRT | 6    | CCDS42874.1    | NM_007050         | M13-ATATCCGTGTGGGAGTCACC   | ACCATAGTTTCTCCGTTTGG        | GTA AACGACG GCCAGT |
| 513 | 79                    | PTPRT-7  | PTPRT | 7    | CCDS42874.1    | NM_007050         | M13-CCTTGTCGTCATGTGCTTGAG  | AGGCAAGAGGAAAGCCAGTC        | GTA AACGACG GCCAGT |
| 514 | 79                    | PTPRT-8  | PTPRT | 8    | CCDS42874.1    | NM_007050         | M13-TGTGTTCCCTGTTGTAGCAGAA | AAGCCTCATAACTGACTGCCAT      | GTA AACGACG GCCAGT |
| 515 | 79                    | PTPRT-9  | PTPRT | 9    | CCDS42874.1    | NM_007050         | GAGAACGTACAGCCCATCAGAC     | M13-TGGGTATTCACCAATGTCAGG   | GTA AACGACG GCCAGT |
| 516 | 79                    | PTPRT-10 | PTPRT | 10   | CCDS42874.1    | NM_007050         | M13-CAGAATCTGCTGGCCAAGTTC  | CTGGATCGTCCTAATTCACC        | GTA AACGACG GCCAGT |
| 517 | 79                    | PTPRT-11 | PTPRT | 11   | CCDS42874.1    | NM_007050         | AGGCCTGGAAGGCTTCTTATC      | M13-TCACATGATTCAACTGGAGGC   | GTA AACGACG GCCAGT |
| 518 | 79                    | PTPRT-12 | PTPRT | 12   | CCDS42874.1    | NM_007050         | M13-AGGAGAAGTTGGGTTGACACC  | GCCCTGCTGACTTATCATTG        | GTA AACGACG GCCAGT |
| 519 | 79                    | PTPRT-13 | PTPRT | 13   | CCDS42874.1    | NM_007050         | GGGAATGAGGTTTATGAGATGG     | M13-TGTTGCCTAATCTTCTCTGTGTG | GTA AACGACG GCCAGT |
| 520 | 79                    | PTPRT-14 | PTPRT | 14   | CCDS42874.1    | NM_007050         | AAGTACCTGGCATGCTGTTGG      | M13-GGTGGAAAGACTGCTGATTCC   | GTA AACGACG GCCAGT |
| 521 | 79                    | PTPRT-15 | PTPRT | 15   | CCDS42874.1    | NM_007050         | M13-CCTCACAAGGAATTGGTCCTC  | GAAGATCCCTGCTGGACAATG       | GTA AACGACG GCCAGT |
| 522 | 79                    | PTPRT-16 | PTPRT | 16   | CCDS42874.1    | NM_007050         | AACAGCCAACATGAAACATGG      | M13-ACAGACACTTGGTTGGTGCAG   | GTA AACGACG GCCAGT |
| 523 | 79                    | PTPRT-17 | PTPRT | 17   | CCDS42874.1    | NM_007050         | M13-TAGAACATGCATTGTCGGG    | GCAAGCATCCATACCCTATGC       | GTA AACGACG GCCAGT |
| 524 | 79                    | PTPRT-18 | PTPRT | 18   | CCDS42874.1    | NM_007050         | M13-GTTGAGTCCCAAGTTGGTTCC  | TGTAGCAAGGCTTTAGTGCCC       | GTA AACGACG GCCAGT |
| 525 | 79                    | PTPRT-19 | PTPRT | 19   | CCDS42874.1    | NM_007050         | M13-GGGTCTTACTTTGCCCTGTTG  | CTAGGGATGGCAGTAAGGCTG       | GTA AACGACG GCCAGT |
| 526 | 79                    | PTPRT-20 | PTPRT | 20   | CCDS42874.1    | NM_007050         | AATGGGAGCAGTAACTGAGGG      | M13-ATCAAGGAGGATCCAGACTGC   | GTA AACGACG GCCAGT |
| 527 | 79                    | PTPRT-21 | PTPRT | 21   | CCDS42874.1    | NM_007050         | M13-TTGCCACTTCTCTGGGAATAAC | GCTGGTGGAAACTCATTCTC        | GTA AACGACG GCCAGT |
| 528 | 79                    | PTPRT-22 | PTPRT | 22   | CCDS42874.1    | NM_007050         | CACCAGTGTGGAGACTTGACC      | M13-GAAGGGAAAGGACATTGCTTG   | GTA AACGACG GCCAGT |
| 529 | 79                    | PTPRT-23 | PTPRT | 23   | CCDS42874.1    | NM_007050         | TTGGGTTTATTTGGATGGGAC      | M13-CTGGACGTAGAGCAGACCCTC   | GTA AACGACG GCCAGT |
| 530 | 79                    | PTPRT-24 | PTPRT | 24   | CCDS42874.1    | NM_007050         | M13-GCAGCAGCTATGGCTCCAC    | GATGTATGCCACCATGACCAG       | GTA AACGACG GCCAGT |
| 531 | 79                    | PTPRT-25 | PTPRT | 25   | CCDS42874.1    | NM_007050         | GGGATAGGGCTGAATGCTAGG      | M13-CTCTCACACCCAGTCTTTTC    | GTA AACGACG GCCAGT |
| 532 | 79                    | PTPRT-26 | PTPRT | 26   | CCDS42874.1    | NM_007050         | AAATTTGGCCCTTTGGGTTAC      | M13-TTACTGGAAGCTTGATGCTGG   | GTA AACGACG GCCAGT |
| 533 | 79                    | PTPRT-27 | PTPRT | 27   | CCDS42874.1    | NM_007050         | M13-TAGGCAGTTAGGCTGAGTTG   | AGAGCCCACCTTGTGCTAGG        | GTA AACGACG GCCAGT |
| 534 | 79                    | PTPRT-28 | PTPRT | 28   | CCDS42874.1    | NM_007050         | M13-CTCAGTCCAGGCCTCATCATC  | AATGGCTTGTCTGATGCTCG        | GTA AACGACG GCCAGT |
| 535 | 79                    | PTPRT-29 | PTPRT | 29   | CCDS42874.1    | NM_007050         | GTGCCAATGCACTCCAGG         | M13-AGCACAACACAGACTCTTGCC   | GTA AACGACG GCCAGT |
| 536 | 79                    | PTPRT-30 | PTPRT | 30   | CCDS42874.1    | NM_007050         | CACCATGATGCTGCAGTCC        | M13-TTGAGGGATGTTGAGTTGTTGG  | GTA AACGACG GCCAGT |
| 537 | 79                    | PTPRT-31 | PTPRT | 31   | CCDS42874.1    | NM_007050         | AGGCTAAAGCCTCACCATTG       | M13-TTAGCAGCCAGGTGTTGAGTG   | GTA AACGACG GCCAGT |
| 538 | 79                    | PTPRT-32 | PTPRT | 32   | CCDS42874.1    | NM_007050         | GTAGAAGCAGGCATCAAGCAG      | M13-CCCAGTTACTGCCATTACAC    | GTA AACGACG GCCAGT |
| 539 | 79                    | TNS1-1   | TNS1  | 1    | CCDS2407.1     | NM_022648         | GTCACACAGGGTGTGTATGGG      | M13-TTGAAGACTCAGGCACGAGAG   | GTA AACGACG GCCAGT |
| 540 | 79                    | TNS1-2a  | TNS1  | 2    | CCDS2407.1     | NM_022648         | CCATGTTCTCTCTCTCCTCG       | M13-GACCTGGGTGAAAGTCACTG    | GTA AACGACG GCCAGT |
| 541 | 79                    | TNS1-2b  | TNS1  | 2    | CCDS2407.1     | NM_022648         | M13-CCATGTTCTCTCTCTCCTCG   | GACCTGGGTGAAAGTCACTG        | GTA AACGACG GCCAGT |

|     | # of Tumors sequenced | Primer   | Gene | Exon | CCDS accession | Ref Seq accession | Forward Primer            | Reverse Primer             | Sequencing Primer  |
|-----|-----------------------|----------|------|------|----------------|-------------------|---------------------------|----------------------------|--------------------|
| 542 | 79                    | TNS1-3   | TNS1 | 3    | CCDS2407.1     | NM_022648         | M13-ACAGTGAGTCAGTGCCAGGG  | TCATCCAAGGACACATTCAGG      | GTA AACGACG GCCAGT |
| 543 | 79                    | TNS1-4   | TNS1 | 4    | CCDS2407.1     | NM_022648         | M13-TTCTCCCTTAAATCCACACCC | GTCCTCATCGCTTCTCATTCC      | GTA AACGACG GCCAGT |
| 544 | 79                    | TNS1-5   | TNS1 | 5    | CCDS2407.1     | NM_022648         | M13-TGCTTCCCTCCAGGACAAAG  | CTAGGCACAGCTATCCCATCC      | GTA AACGACG GCCAGT |
| 545 | 79                    | TNS1-6   | TNS1 | 6    | CCDS2407.1     | NM_022648         | GGTCTAGGGCAATGTCTTGG      | M13-TCGGGCTGTCTGTTACTACCC  | GTA AACGACG GCCAGT |
| 546 | 79                    | TNS1-7   | TNS1 | 7    | CCDS2407.1     | NM_022648         | M13-TCCTTCACTGTCTCCTCTGC  | CTAGTCTGGCTGTCTCCTGGG      | GTA AACGACG GCCAGT |
| 547 | 79                    | TNS1-8   | TNS1 | 8    | CCDS2407.1     | NM_022648         | GGGCTGAAAGGACAGAGTCAG     | M13-AGCCCAGGAGGAGTACCTGTC  | GTA AACGACG GCCAGT |
| 548 | 79                    | TNS1-9   | TNS1 | 9    | CCDS2407.1     | NM_022648         | M13-GGTGTTGATGAGCTCTCCCTC | CCCACCATATCGTCTCAAATG      | GTA AACGACG GCCAGT |
| 549 | 79                    | TNS1-10  | TNS1 | 10   | CCDS2407.1     | NM_022648         | ACCTCAGGCAAGTAGGACAGG     | M13-TGATCACTGTGGAACAGACCAG | GTA AACGACG GCCAGT |
| 550 | 79                    | TNS1-11  | TNS1 | 11   | CCDS2407.1     | NM_022648         | GTCCAGCTTAAGCCACTGGTC     | M13-AGGCCAAGAGAAGCAAGGTC   | GTA AACGACG GCCAGT |
| 551 | 79                    | TNS1-12a | TNS1 | 12   | CCDS2407.1     | NM_022648         | M13-CTGGCAGAGTGGATGATACCC | TCATCGTCCAGGATGTCTGTC      | GTA AACGACG GCCAGT |
| 552 | 79                    | TNS1-12b | TNS1 | 12   | CCDS2407.1     | NM_022648         | M13-GGAACACACGCTTCTGTGAG  | CTCTGGTAGCCAGCTAAACCC      | GTA AACGACG GCCAGT |
| 553 | 79                    | TNS1-12c | TNS1 | 12   | CCDS2407.1     | NM_022648         | ACACTCTTCTCTGGACGGG       | M13-ACTGTTCAATCTCCTGTGGG   | GTA AACGACG GCCAGT |
| 554 | 79                    | TNS1-12d | TNS1 | 12   | CCDS2407.1     | NM_022648         | AGTGACCACCTCCACTATGC      | M13-GGAGGGACAGACTCCAGAGAG  | GTA AACGACG GCCAGT |
| 555 | 79                    | TNS1-12e | TNS1 | 12   | CCDS2407.1     | NM_022648         | ACACAAGTCCAGAGTGTC        | M13-ACCAGTGAAGCAACATCTGC   | GTA AACGACG GCCAGT |
| 556 | 79                    | TNS1-12f | TNS1 | 12   | CCDS2407.1     | NM_022648         | CTACCAGAGGCCCTGTCC        | M13-GGGAAGTCCAGGAGACTGG    | GTA AACGACG GCCAGT |
| 557 | 79                    | TNS1-12g | TNS1 | 12   | CCDS2407.1     | NM_022648         | M13-CCAGTTTCAATGTCAATGGTG | GCCTGTGGCTACAAGACTC        | GTA AACGACG GCCAGT |
| 558 | 79                    | TNS1-13  | TNS1 | 13   | CCDS2407.1     | NM_022648         | M13-CCTCTGAGCTAGGAGGCACTG | TTGACCATCAGGTTTCTGGAG      | GTA AACGACG GCCAGT |
| 559 | 79                    | TNS1-14  | TNS1 | 14   | CCDS2407.1     | NM_022648         | GGGCTGGTTAACTCACTGTCC     | M13-ACAAGCAATGGAAGAGAAGGG  | GTA AACGACG GCCAGT |
| 560 | 79                    | TNS1-15  | TNS1 | 15   | CCDS2407.1     | NM_022648         | M13-CTACTAAGCGTGCCTCAC    | AAGGCTGCAAGGAAATCTGTC      | GTA AACGACG GCCAGT |
| 561 | 79                    | TNS1-16  | TNS1 | 16   | CCDS2407.1     | NM_022648         | TGAAGTCCAGAAAGTCTCC       | M13-GCTCCGAGGCATAGTTGAGTC  | GTA AACGACG GCCAGT |
| 562 | 79                    | TNS1-17  | TNS1 | 17   | CCDS2407.1     | NM_022648         | TCTGTGGACAGCGCAAATC       | M13-CCTGAGTCCCAGTGAGGAAAG  | GTA AACGACG GCCAGT |
| 563 | 79                    | TNS1-18  | TNS1 | 18   | CCDS2407.1     | NM_022648         | GGAGTCCAGGAAGCTGTGTTCC    | M13-ATAGGCAACAGATCCAGGAGG  | GTA AACGACG GCCAGT |
| 564 | 79                    | TNS1-19  | TNS1 | 19   | CCDS2407.1     | NM_022648         | GCCTACTGCTTAACTCCCTG      | M13-TCATCTGGTGATGGCTCAAAC  | GTA AACGACG GCCAGT |
| 565 | 79                    | TNS1-19a | TNS1 | 19   | CCDS2407.1     | NM_022648         | M13-CGTCTGCCAGAGAACTACC   | GAACCACAGATCCAGACCCTC      | GTA AACGACG GCCAGT |
| 566 | 79                    | TNS1-19b | TNS1 | 19   | CCDS2407.1     | NM_022648         | M13-GTCTACCAGGTTTCTGGCCTC | AGAGTGTGGGAGAAGGAGACG      | GTA AACGACG GCCAGT |
| 567 | 79                    | TNS1-19c | TNS1 | 19   | CCDS2407.1     | NM_022648         | CCTACTACCTGGCCTGAGC       | M13-CCAGAAGTCAGTGATTACCC   | GTA AACGACG GCCAGT |
| 568 | 79                    | TNS1-20  | TNS1 | 20   | CCDS2407.1     | NM_022648         | M13-GGGCCAGGACTTTGATGATG  | CCTACTGTCCAGCTTCAACCC      | GTA AACGACG GCCAGT |
| 569 | 79                    | TNS1-21  | TNS1 | 21   | CCDS2407.1     | NM_022648         | AAAGAACGAAGGTGGTAGGC      | M13-TGATGGGAGTTAAGTCTGTC   | GTA AACGACG GCCAGT |
| 570 | 79                    | TNS1-22  | TNS1 | 22   | CCDS2407.1     | NM_022648         | GTCAGAGATTGGGAAAGCAGG     | M13-GCTGTCCAGAAAGAACTGGG   | GTA AACGACG GCCAGT |
| 571 | 79                    | TNS1-23  | TNS1 | 23   | CCDS2407.1     | NM_022648         | M13-AGGGTAGAGGTGGAGGTTTCC | TCCTGAACAATCTGGCAAGTC      | GTA AACGACG GCCAGT |
| 572 | 79                    | TNS1-24  | TNS1 | 24   | CCDS2407.1     | NM_022648         | M13-GTTGCAGAGCTCACCTTCAGC | CCAGATCCATTCTCAGGGAG       | GTA AACGACG GCCAGT |
| 573 | 79                    | TNS1-25  | TNS1 | 25   | CCDS2407.1     | NM_022648         | M13-CTCCCTGAAGAATGGATCTGG | AAATGTGTGGGTACACGGATG      | GTA AACGACG GCCAGT |
| 574 | 79                    | TNS1-26  | TNS1 | 26   | CCDS2407.1     | NM_022648         | M13-AGTTGTGTGGACCTGCGATAG | TTACTCACACATGGGCAGACC      | GTA AACGACG GCCAGT |
| 575 | 79                    | TNS1-27  | TNS1 | 27   | CCDS2407.1     | NM_022648         | GAATGCATCTGTGTGATCTTGG    | M13-AGCCCTGGTTTCTAAATGTGC  | GTA AACGACG GCCAGT |
| 576 | 79                    | TNS1-28  | TNS1 | 28   | CCDS2407.1     | NM_022648         | ACCTCTCTGAGTCCCTGATGC     | M13-AGAGTGGTCAGGATTCATGGG  | GTA AACGACG GCCAGT |
| 577 | 79                    | TNS4-1a  | TNS4 | 1    | CCDS11368.1    | NM_032865         | M13-GGAGCTCCTGGTTAGCAAGTG | a                          | GTA AACGACG GCCAGT |
| 578 | 79                    | TNS4-1b  | TNS4 | 1    | CCDS11368.1    | NM_032865         | M13-TAAAGTCAGAGGTCACCACC  | TTGGTTAGGTTTGACAGCAC       | GTA AACGACG GCCAGT |



|     | # of Tumors sequenced | Primer  | Gene | Exon | CCDS accession | Ref Seq accession | Forward Primer            | Reverse Primer             | Sequencing Primer |
|-----|-----------------------|---------|------|------|----------------|-------------------|---------------------------|----------------------------|-------------------|
| 579 | 79                    | TNS4-2a | TNS4 | 2    | CCDS11368.1    | NM_032865         | GATCTGAAGCCTGGGTCTGTC     | M13-CTCCAGTCTTGGAGAAGCCAC  | GTAAAACGACGGCCAGT |
| 580 | 79                    | TNS4-2b | TNS4 | 2    | CCDS11368.1    | NM_032865         | GAGACACGAAGCAGCAGTGAG     | M13-AAATGCTTGAGGACAGCTTGAG | GTAAAACGACGGCCAGT |
| 581 | 79                    | TNS4-3  | TNS4 | 3    | CCDS11368.1    | NM_032865         | GTTGCCCTAACACCCTGTCTG     | M13-AATGTGTTGACTGGCTGTTGC  | GTAAAACGACGGCCAGT |
| 582 | 79                    | TNS4-4  | TNS4 | 4    | CCDS11368.1    | NM_032865         | M13-TGGTGGTTGAATGAAACCTTG | CTTCCAGGACCCACTATTTG       | GTAAAACGACGGCCAGT |
| 583 | 79                    | TNS4-5  | TNS4 | 5    | CCDS11368.1    | NM_032865         | M13-CCGAGGAAGTAGGAACCACAG | GTCACCCTGAAAGCTAGTGCC      | GTAAAACGACGGCCAGT |
| 584 | 79                    | TNS4-6  | TNS4 | 6    | CCDS11368.1    | NM_032865         | ACTACAGGCATGTGAACCACG     | M13-CCCTGCATGAGTAGAGCTTCC  | GTAAAACGACGGCCAGT |
| 585 | 79                    | TNS4-7  | TNS4 | 7    | CCDS11368.1    | NM_032865         | M13-AAGTCTCCGTTGTGAGCTGAG | CACAGCTAGGAGGTGGAGATG      | GTAAAACGACGGCCAGT |
| 586 | 79                    | TNS4-8  | TNS4 | 8    | CCDS11368.1    | NM_032865         | M13-GAGGTGGGAGATCTTCAAAGG | AAAGCTGAGATGGGAAACACG      | GTAAAACGACGGCCAGT |
| 587 | 79                    | TNS4-9  | TNS4 | 9    | CCDS11368.1    | NM_032865         | M13-CCACACACCCACTTTCTGTTG | CTGCAGCTGTCTCAGCTATCC      | GTAAAACGACGGCCAGT |
| 588 | 79                    | TNS4-10 | TNS4 | 10   | CCDS11368.1    | NM_032865         | GAGACTTCTTGGAGGACAGGG     | M13-CCTACCCTCATTCTGTCACCC  | GTAAAACGACGGCCAGT |
| 589 | 79                    | TNS4-11 | TNS4 | 11   | CCDS11368.1    | NM_032865         | M13-CGGAAGTAAGTTCAAGGCTGG | GTCAGAATGGTGCCTCTTTCC      | GTAAAACGACGGCCAGT |
| 590 | 79                    | TNS4-12 | TNS4 | 12   | CCDS11368.1    | NM_032865         | M13-GAATGAGATGCAGGCTGAGG  | TCTGTCAATATGGCCACAAGC      | GTAAAACGACGGCCAGT |

**Supp. Table S4. Summary of number of base pairs sequenced**

| Gene Name          | # of Primers Used | # of Exons of the Gene | # of Covered Exons | Uncovered            | % of Coverage | # of NS mutations found | # of S mutations found | # of bps sequenced | # of bps sequenced in exon + splice sites | # of NS mutations per bp | # of S mutations per bp |
|--------------------|-------------------|------------------------|--------------------|----------------------|---------------|-------------------------|------------------------|--------------------|-------------------------------------------|--------------------------|-------------------------|
|                    |                   |                        |                    | # of Uncovered Exons |               |                         |                        |                    |                                           |                          |                         |
| <i>PTPRT</i>       | 33                | 33                     | 33                 | 0                    | 100.0         | 27                      | 6                      | 346,020            | 347,600                                   | 7.77E-05                 | 1.73E-05                |
| <i>PTPRN2</i>      | 22                | 25                     | 23                 | 2                    | 92.0          | 11                      | 0                      | 240,555            | 242,135                                   | 4.54E-05                 | 0.00E+00                |
| <i>TNS4</i>        | 14                | 13                     | 12                 | 1                    | 92.3          | 8                       | 2                      | 169,455            | 171,035                                   | 4.68E-05                 | 1.17E-05                |
| <i>PTPRO</i>       | 30                | 26                     | 26                 | 0                    | 100.0         | 11                      | 1                      | 288,192            | 289,772                                   | 3.80E-05                 | 3.45E-06                |
| <i>PTPRD</i>       | 35                | 43                     | 43                 | 0                    | 100.0         | 18                      | 5                      | 453,144            | 454,724                                   | 3.96E-05                 | 1.10E-05                |
| <i>PTPRN</i>       | 29                | 23                     | 20                 | 3                    | 87.0          | 8                       | 2                      | 232,023            | 233,603                                   | 3.42E-05                 | 8.56E-06                |
| <i>PTPRB</i>       | 38                | 36                     | 35                 | 1                    | 97.2          | 19                      | 3                      | 524,955            | 526,535                                   | 3.61E-05                 | 5.70E-06                |
| <i>PTPN5</i>       | 14                | 15                     | 15                 | 0                    | 100.0         | 3                       | 3                      | 133,905            | 135,485                                   | 2.21E-05                 | 2.21E-05                |
| <i>PTPRH</i>       | 21                | 20                     | 20                 | 0                    | 100.0         | 7                       | 0                      | 264,255            | 265,835                                   | 2.63E-05                 | 0.00E+00                |
| <i>PTPRE</i>       | 19                | 20                     | 20                 | 0                    | 100.0         | 4                       | 5                      | 165,900            | 167,480                                   | 2.39E-05                 | 2.99E-05                |
| <i>PTP4A1</i>      | 5                 | 5                      | 5                  | 0                    | 100.0         | 1                       | 0                      | 41,001             | 42,581                                    | 2.35E-05                 | 0.00E+00                |
| <i>PTPRC</i>       | 32                | 34                     | 33                 | 1                    | 97.1          | 7                       | 0                      | 309,048            | 310,628                                   | 2.25E-05                 | 0.00E+00                |
| <i>PTPRS</i>       | 34                | 40                     | 37                 | 3                    | 92.5          | 9                       | 2                      | 461,676            | 463,256                                   | 1.94E-05                 | 4.32E-06                |
| <i>MTMR3</i>       | 23                | 18                     | 17                 | 1                    | 94.4          | 5                       | 1                      | 283,926            | 285,506                                   | 1.75E-05                 | 3.50E-06                |
| <i>MTMR12</i>      | 17                | 16                     | 16                 | 0                    | 100.0         | 3                       | 0                      | 177,039            | 178,619                                   | 1.68E-05                 | 0.00E+00                |
| <i>PTPN12</i>      | 20                | 18                     | 18                 | 0                    | 100.0         | 3                       | 0                      | 184,860            | 186,440                                   | 1.61E-05                 | 0.00E+00                |
| <i>TNS1</i>        | 38                | 33                     | 33                 | 0                    | 100.0         | 6                       | 5                      | 411,195            | 412,775                                   | 1.45E-05                 | 1.21E-05                |
| <i>PTPN13</i>      | 53                | 47                     | 47                 | 0                    | 100.0         | 8                       | 0                      | 590,130            | 591,710                                   | 1.35E-05                 | 0.00E+00                |
| <i>MTMR6</i>       | 14                | 14                     | 14                 | 0                    | 100.0         | 2                       | 1                      | 147,177            | 148,757                                   | 1.34E-05                 | 6.72E-06                |
| <i>PTPRJ</i>       | 25                | 26                     | 25                 | 1                    | 96.2          | 5                       | 0                      | 316,869            | 318,449                                   | 1.57E-05                 | 0.00E+00                |
| <i>MTMR8</i>       | 17                | 14                     | 14                 | 0                    | 100.0         | 2                       | 1                      | 166,848            | 168,428                                   | 1.19E-05                 | 5.94E-06                |
| <i>PTPN21</i>      | 23                | 18                     | 18                 | 0                    | 100.0         | 3                       | 0                      | 278,238            | 279,818                                   | 1.07E-05                 | 0.00E+00                |
| <i>PTPN23</i>      | 34                | 25                     | 23                 | 2                    | 92.0          | 2                       | 1                      | 387,732            | 389,312                                   | 5.14E-06                 | 2.57E-06                |
| <b>Grand Total</b> | <b>206</b>        | <b>562</b>             | <b>547</b>         | <b>0</b>             | <b>97.3</b>   | <b>120</b>              | <b>45</b>              | <b>6,574,143</b>   | <b>6,610,483</b>                          |                          |                         |

**Supp. Table S5. Characteristics of melanoma patients with PTP mutations**

| Sample | Patient Age (years) | Patient Gender | Tumor Source                      | Matched normal source |
|--------|---------------------|----------------|-----------------------------------|-----------------------|
| 1T     | 29                  | F              | Lung                              | Blood                 |
| 2T     | 30                  | M              | Pectoral muscle                   | Blood                 |
| 4T     | 34                  | F              | Lung                              | Blood                 |
| 5T     | 47                  | M              | External iliac soft tissue        | Blood                 |
| 6T     | 42                  | M              | Neck, soft tissue                 | Blood                 |
| 7T     | 53                  | M              | Stomach                           | Blood                 |
| 8T     | 61                  | M              | Inguinal soft tissue              | Blood                 |
| 9T     | 62                  | M              | Back, subcutaneous                | Blood                 |
| 10T    | 55                  | M              | Axillary soft tissue              | Blood                 |
| 12T    | 53                  | M              | Upper arm, subcutaneous           | Blood                 |
| 13T    | 49                  | M              | Chest wall, subcutaneous          | Blood                 |
| 16T    | 62                  | M              | Lung                              | Blood                 |
| 17T    | 33                  | M              | Shoulder, subcutaneous            | Blood                 |
| 18T    | 55                  | M              | Clavicle, soft tissue             | Blood                 |
| 20T    | 58                  | F              | Axillary soft tissue              | Blood                 |
| 21T    | 59                  | M              | Omentum                           | Blood                 |
| 23T    | 44                  | M              | Lung                              | Blood                 |
| 24T    | 49                  | M              | Axillary soft tissue              | Blood                 |
| 29T    | 51                  | M              | Inguinal soft tissue              | Blood                 |
| 30T    | 53                  | F              | Lung                              | Blood                 |
| 31T    | 49                  | F              | Thigh, subcutaneous               | Blood                 |
| 32T    | 58                  | M              | Omentum                           | Blood                 |
| 33T    | 33                  | M              | Chest wall subcutaneous, & pleura | Blood                 |
| 34T    | 31                  | M              | Shoulder, subcutaneous            | Blood                 |
| 35T    | 23                  | F              | Thigh, subcutaneous               | Blood                 |
| 36T    | 25                  | M              | Thigh, subcutaneous               | Blood                 |
| 37T    | 38                  | F              | Omentum                           | Blood                 |
| 39T    | 56                  | M              | Mesentery                         | Blood                 |
| 41T    | 45                  | M              | Neck, soft tissue                 | Blood                 |
| 44T    | 56                  | M              | Lung                              | Blood                 |
| 45T    | 48                  | M              | Mediastinum                       | Blood                 |
| 48T    | 28                  | M              | Back, soft tissue                 | Blood                 |
| 49T    | 43                  | M              | Thigh, subcutaneous               | Blood                 |
| 50T    | 49                  | F              | Inguinal soft tissue              | Blood                 |

| <b>Sample</b> | <b>Patient Age (years)</b> | <b>Patient Gender</b> | <b>Tumor Source</b>           | <b>Matched normal source</b> |
|---------------|----------------------------|-----------------------|-------------------------------|------------------------------|
| 51T           | 50                         | F                     | Adnexa                        | Blood                        |
| 52T           | 39                         | F                     | Lung                          | Blood                        |
| 55T           | 60                         | M                     | Lung                          | Blood                        |
| 58T           | 46                         | F                     | Hip, subcutaneous             | Blood                        |
| 59T           | 64                         | F                     | Abdomen, subcutaneous         | Blood                        |
| 60T           | 46                         | M                     | Flank, subcutaneous           | Blood                        |
| 63T           | 30                         | M                     | Jejunum                       | Blood                        |
| 64T           | 32                         | F                     | Ovary                         | Blood                        |
| 68T           | 49                         | M                     | Lung                          | Blood                        |
| 69T           | 36                         | M                     | Axillary soft tissue          | Blood                        |
| 71T           | 67                         | M                     | Lung                          | Blood                        |
| 72T           | 53                         | M                     | Liver                         | Blood                        |
| 73T           | 45                         | F                     | Breast                        | Blood                        |
| 74T           | 40                         | F                     | Lower extremity, subcutaneous | Blood                        |
| 80T           | 36                         | F                     | Popliteal soft tissue         | Blood                        |
| 81T           | 60                         | F                     | Upper arm, subcutaneous       | Blood                        |
| 83T           | 33                         | F                     | Back, subcutaneous            | Blood                        |
| 85T           | 44                         | M                     | Chest wall, subcutaneous      | Blood                        |
| 86T           | 42                         | F                     | Liver                         | Blood                        |
| 88T           | 37                         | F                     | Chest wall, subcutaneous      | Blood                        |
| 90T           | 19                         | M                     | Neck, soft tissue             | Blood                        |
| 91T           | 55                         | F                     | Subcostal soft tissue         | Blood                        |
| 95T           | 58                         | F                     | Inguinal soft tissue          | Blood                        |
| 96T           | 49                         | M                     | Inguinal soft tissue          | Blood                        |
| 103T          | 35                         | F                     | Axillary soft tissue          | Blood                        |
| 104T          | 56                         | M                     | Thigh, subcutaneous           | Blood                        |
| 106T          | 41                         | F                     | Lung                          | Blood                        |

**Supp. Table S6. Mass spectrometry data showing PTPRD interactome from icPTPRD-WT and icPTPRD-D1521A expressing Sk-Mel-28 cells induced by doxycycline for 24h**

| Protein peptides                                                                          | Accession No. | icPTPRD-D1521A | icPTPRD-WT | Control |
|-------------------------------------------------------------------------------------------|---------------|----------------|------------|---------|
| Receptor-type tyrosine-protein phosphatase delta OS=Homo sapiens GN=PTPRD PE=1 SV=2       | P23468        | 307            | 202        |         |
| Protein arginine N-methyltransferase 5 OS=Homo sapiens GN=PRMT5 PE=1 SV=4                 | O14744        | 137            | 104        | 89      |
| Probable ATP-dependent RNA helicase DDX20 OS=Homo sapiens GN=DDX20 PE=1 SV=2              | Q9UHI6        | 49             | 42         | 22      |
| Component of gems 4 OS=Homo sapiens GN=GEMIN4 PE=1 SV=1                                   | P57678        | 44             | 34         | 20      |
| Gem-associated protein 5 OS=Homo sapiens GN=GEMIN5 PE=1 SV=3                              | Q8TEQ6        | 39             | 30         | 15      |
| RNA-binding protein 10 OS=Homo sapiens GN=RBM10 PE=1 SV=3                                 | P98175        | 36             | 28         | 3       |
| Influenza virus NS1A-binding protein OS=Homo sapiens GN=IVNS1ABP PE=1 SV=3                | Q9Y6Y0        | 34             | 28         | 85      |
| Tubulin alpha-1A chain OS=Homo sapiens GN=TUBA1A PE=1 SV=1                                | Q71U36        | 32             | 34         | 31      |
| Filamin-A OS=Homo sapiens GN=FLNA PE=1 SV=4                                               | P21333        | 31             | 23         | 39      |
| Spectrin alpha chain, brain OS=Homo sapiens GN=SPTAN1 PE=1 SV=3                           | Q13813        | 31             | 14         | 127     |
| Methylosome protein 50 OS=Homo sapiens GN=WDR77 PE=1 SV=1                                 | Q9BQA1        | 28             | 29         | 17      |
| Tubulin beta-2A chain OS=Homo sapiens GN=TUBB2A PE=1 SV=1                                 | Q13885        | 28             | 17         | 22      |
| Eukaryotic translation initiation factor 4B OS=Homo sapiens GN=EIF4B PE=1 SV=2            | P23588        | 28             | 13         | 10      |
| Spectrin beta chain, brain 1 OS=Homo sapiens GN=SPTBN1 PE=1 SV=2                          | Q01082        | 27             | 14         | 98      |
| Methylosome subunit pICln OS=Homo sapiens GN=CLNS1A PE=1 SV=1                             | P54105        | 25             | 16         | 10      |
| U5 small nuclear ribonucleoprotein 200 kDa helicase OS=Homo sapiens GN=SNRNP200 PE=1 SV=2 | O75643        | 20             | 13         |         |
| Heat shock cognate 71 kDa protein OS=Homo sapiens GN=HSPA8 PE=1 SV=1                      | P11142        | 17             | 9          | 22      |

| Protein peptides                                                                                           | Accession No. | icPTPRD-D1521A | icPTPRD-WT | Control |
|------------------------------------------------------------------------------------------------------------|---------------|----------------|------------|---------|
| Uncharacterized protein C9orf174 OS=Homo sapiens GN=C9orf174 PE=1 SV=2                                     | Q9P1Z9        | 17             | 14         | 17      |
| Splicing factor 3B subunit 1 OS=Homo sapiens GN=SF3B1 PE=1 SV=3                                            | O75533        | 16             | 9          |         |
| Ribose-phosphate pyrophosphokinase 1 OS=Homo sapiens GN=PRPS1 PE=1 SV=2                                    | P60891        | 16             | 9          | 25      |
| Splicing factor 3B subunit 3 OS=Homo sapiens GN=SF3B3 PE=1 SV=4                                            | Q15393        | 16             | 17         |         |
| OTU domain-containing protein 4 OS=Homo sapiens GN=OTUD4 PE=1 SV=3                                         | Q01804        | 16             | 10         | 4       |
| Kinesin-like protein KIF11 OS=Homo sapiens GN=KIF11 PE=1 SV=2                                              | P52732        | 15             | 16         |         |
| Phosphoribosyl pyrophosphate synthase-associated protein 2 OS=Homo sapiens GN=PRPSAP2 PE=1 SV=1            | O60256        | 14             | 10         | 25      |
| Arf-GAP with coiled-coil, ANK repeat and PH domain-containing protein 2 OS=Homo sapiens GN=ACAP2 PE=1 SV=3 | Q15057        | 13             | 13         | 36      |
| Tubulin beta-1 chain OS=Homo sapiens GN=TUBB1 PE=1 SV=1                                                    | Q9H4B7        | 12             | 6          | 8       |
| Vimentin OS=Homo sapiens GN=VIM PE=1 SV=4                                                                  | P08670        | 12             | 7          | 17      |
| RING finger protein 219 OS=Homo sapiens GN=RNF219 PE=1 SV=1                                                | Q5W0B1        | 12             | 7          |         |
| Serine/threonine-protein kinase 38 OS=Homo sapiens GN=STK38 PE=1 SV=1                                      | Q15208        | 11             | 10         | 12      |
| Survival of motor neuron protein-interacting protein 1 OS=Homo sapiens GN=SIP1 PE=1 SV=1                   | O14893        | 11             | 2          | 2       |
| Serine/threonine-protein kinase RIO1 OS=Homo sapiens GN=RIOK1 PE=1 SV=2                                    | Q9BRS2        | 11             | 7          |         |
| Nucleolin OS=Homo sapiens GN=NCL PE=1 SV=3                                                                 | P19338        | 11             | 11         | 4       |
| Terminal uridylyltransferase 4 OS=Homo sapiens GN=ZCCHC11 PE=1 SV=3                                        | Q5TAX3        | 11             | 4          | 10      |
| Small nuclear ribonucleoprotein Sm D1 OS=Homo sapiens GN=SNRPD1 PE=1 SV=1                                  | P62314        | 10             | 3          | 2       |
| Heterogeneous nuclear ribonucleoprotein H OS=Homo sapiens GN=HNRNPH1 PE=1 SV=4                             | P31943        | 10             | 8          | 3       |
| Desmoplakin OS=Homo sapiens GN=DSP PE=1 SV=3                                                               | P15924        | 10             | 1          | 1       |

| Protein peptides                                                                                      | Accession No. | icPTPRD-D1521A | icPTPRD-WT | Control |
|-------------------------------------------------------------------------------------------------------|---------------|----------------|------------|---------|
| Serine-threonine kinase receptor-associated protein OS=Homo sapiens GN=STRAP PE=1 SV=1                | Q9Y3F4        | 10             | 16         | 11      |
| Phosphoribosyl pyrophosphate synthase-associated protein 1 OS=Homo sapiens GN=PRPSAP1 PE=1 SV=2       | Q14558        | 10             | 10         | 24      |
| Mitogen-activated protein kinase kinase kinase 7 OS=Homo sapiens GN=MAP3K7 PE=1 SV=1                  | O43318        | 9              | 3          | 3       |
| Spindlin-1 OS=Homo sapiens GN=SPIN1 PE=1 SV=3                                                         | Q9Y657        | 9              | 2          |         |
| Small nuclear ribonucleoprotein Sm D2 OS=Homo sapiens GN=SNRPD2 PE=1 SV=1                             | P62316        | 9              | 5          | 3       |
| IQ motif and SEC7 domain-containing protein 1 OS=Homo sapiens GN=IQSEC1 PE=1 SV=1                     | Q6DN90        | 9              | 9          | 2       |
| Teneurin-3 OS=Homo sapiens GN=ODZ3 PE=2 SV=3                                                          | Q9P273        | 8              | 14         | 10      |
| Heat shock 70 kDa protein 1A/1B OS=Homo sapiens GN=HSPA1A PE=1 SV=5                                   | P08107        | 8              | 5          | 3       |
| Pre-mRNA-processing-splicing factor 8 OS=Homo sapiens GN=PRPF8 PE=1 SV=2                              | Q6P2Q9        | 8              | 4          |         |
| Clathrin heavy chain 1 OS=Homo sapiens GN=CLTC PE=1 SV=5                                              | Q00610        | 8              | 8          | 13      |
| Tubulin beta chain OS=Homo sapiens GN=TUBB PE=1 SV=2                                                  | P07437        | 8              | 15         | 12      |
| Histone H4 OS=Homo sapiens GN=HIST1H4A PE=1 SV=2                                                      | P62805        | 8              |            |         |
| U4/U6 small nuclear ribonucleoprotein Prp31 OS=Homo sapiens GN=PRPF31 PE=1 SV=2                       | Q8WWY3        | 7              | 7          | 2       |
| Small nuclear ribonucleoprotein Sm D3 OS=Homo sapiens GN=SNRPD3 PE=1 SV=1                             | P62318        | 7              | 1          | 1       |
| Small nuclear ribonucleoprotein-associated proteins B and B' OS=Homo sapiens GN=SNRPB PE=1 SV=2       | P14678        | 7              | 2          | 4       |
| CAD protein OS=Homo sapiens GN=CAD PE=1 SV=3                                                          | P27708        | 7              | 4          | 1       |
| 40S ribosomal protein S3 OS=Homo sapiens GN=RPS3 PE=1 SV=2                                            | P23396        | 7              | 7          | 3       |
| ATP-dependent RNA helicase A OS=Homo sapiens GN=DHX9 PE=1 SV=4                                        | Q08211        | 7              | 5          | 1       |
| Putative pre-mRNA-splicing factor ATP-dependent RNA helicase DHX15 OS=Homo sapiens GN=DHX15 PE=1 SV=2 | O43143        | 7              | 10         |         |

| Protein peptides                                                                                           | Accession No. | icPTPRD-D1521A | icPTPRD-WT | Control |
|------------------------------------------------------------------------------------------------------------|---------------|----------------|------------|---------|
| Glycogen debranching enzyme OS=Homo sapiens GN=AGL PE=1 SV=3                                               | P35573        | 7              | 3          | 4       |
| Hypoxia-inducible gene 2 protein OS=Homo sapiens GN=HIG2 PE=1 SV=1                                         | Q9Y5L2        | 7              | 5          | 6       |
| Uncharacterized protein OS=Homo sapiens GN=LGR6                                                            | D6R9F0        | 7              | 4          | 10      |
| 116 kDa U5 small nuclear ribonucleoprotein component OS=Homo sapiens GN=EFTUD2 PE=1 SV=1                   | Q15029        | 6              | 4          |         |
| Uncharacterized protein C11orf84 OS=Homo sapiens GN=C11orf84 PE=1 SV=3                                     | Q9BUA3        | 6              | 4          |         |
| High mobility group protein B1 OS=Homo sapiens GN=HMGB1 PE=1 SV=3                                          | P09429        | 6              | 8          | 9       |
| Calmodulin-regulated spectrin-associated protein 3 OS=Homo sapiens GN=KIAA1543 PE=1 SV=2                   | Q9P1Y5        | 6              | 4          |         |
| Nucleophosmin OS=Homo sapiens GN=NPM1 PE=1 SV=2                                                            | P06748        | 6              | 2          | 1       |
| E3 ubiquitin-protein ligase TRIM21 OS=Homo sapiens GN=TRIM21 PE=1 SV=1                                     | P19474        | 6              | 1          | 22      |
| U4/U6.U5 tri-snRNP-associated protein 1 OS=Homo sapiens GN=SART1 PE=1 SV=1                                 | O43290        | 6              | 1          |         |
| Transcription factor E2F7 OS=Homo sapiens GN=E2F7 PE=1 SV=3                                                | Q96AV8        | 6              | 5          |         |
| Heat shock 70 kDa protein 1-like OS=Homo sapiens GN=HSPA1L PE=1 SV=2                                       | P34931        | 6              | 5          | 5       |
| C-Myc-binding protein OS=Homo sapiens GN=MYCBP PE=1 SV=3                                                   | Q99417        | 6              | 3          | 4       |
| Heat shock protein HSP 90-alpha OS=Homo sapiens GN=HSP90AA1 PE=1 SV=5                                      | P07900        | 6              | 5          | 5       |
| 40S ribosomal protein S18 OS=Homo sapiens GN=RPS18 PE=1 SV=3                                               | P62269        | 5              |            |         |
| 40S ribosomal protein S14 OS=Homo sapiens GN=RPS14 PE=1 SV=3                                               | P62263        | 5              |            | 1       |
| Trypsin-3 OS=Homo sapiens GN=PRSS3 PE=1 SV=2                                                               | P35030        | 5              | 6          | 7       |
| Succinate dehydrogenase [ubiquinone] flavoprotein subunit, mitochondrial OS=Homo sapiens GN=SDHA PE=1 SV=2 | P31040        | 5              | 4          | 5       |
| Survival motor neuron protein OS=Homo sapiens GN=SMN1 PE=1 SV=1                                            | Q16637        | 5              | 4          | 5       |



| Protein peptides                                                                      | Accession No. | icPTPRD-D1521A | icPTPRD-WT | Control |
|---------------------------------------------------------------------------------------|---------------|----------------|------------|---------|
| CCR4-NOT transcription complex subunit 1 OS=Homo sapiens GN=CNOT1 PE=1 SV=2           | A5YKK6        | 5              | 3          |         |
| Junction plakoglobin OS=Homo sapiens GN=JUP PE=1 SV=3                                 | P14923        | 5              | 1          |         |
| Glycosyltransferase 25 family member 3 OS=Homo sapiens GN=CERCAM PE=2 SV=1            | Q5T4B2        | 5              | 11         | 5       |
| Heat shock-related 70 kDa protein 2 OS=Homo sapiens GN=HSPA2 PE=1 SV=1                | P54652        | 5              | 3          | 7       |
| Probable methylcytosine dioxygenase TET2 OS=Homo sapiens GN=TET2 PE=1 SV=3            | Q6N021        | 5              | 1          | 1       |
| Ribose-phosphate pyrophosphokinase 2 OS=Homo sapiens GN=PRPS2 PE=1 SV=2               | P11908        | 5              | 4          | 24      |
| 60S acidic ribosomal protein P2 OS=Homo sapiens GN=RPLP2 PE=1 SV=1                    | P05387        | 5              | 1          | 2       |
| SCY1-like protein 2 OS=Homo sapiens GN=SCYL2 PE=1 SV=1                                | Q6P3W7        | 5              | 2          | 3       |
| Dermcidin OS=Homo sapiens GN=DCD PE=1 SV=2                                            | P81605        | 5              |            | 2       |
| Thyroid hormone receptor-associated protein 3 OS=Homo sapiens GN=THRAP3 PE=1 SV=2     | Q9Y2W1        | 5              |            |         |
| Retinal dehydrogenase 2 OS=Homo sapiens GN=ALDH1A2 PE=1 SV=3                          | O94788        | 4              | 4          | 2       |
| Nuclear pore complex protein Nup93 OS=Homo sapiens GN=NUP93 PE=1 SV=2                 | Q8N1F7        | 4              | 4          | 5       |
| Tubulin alpha-1B chain OS=Homo sapiens GN=TUBA1B PE=1 SV=1                            | P68363        | 4              | 3          | 4       |
| Putative heat shock protein HSP 90-beta-3 OS=Homo sapiens GN=HSP90AB3P PE=5 SV=1      | Q58FF7        | 4              | 3          | 5       |
| Bifunctional aminoacyl-tRNA synthetase OS=Homo sapiens GN=EPRS PE=1 SV=5              | P07814        | 4              | 1          | 2       |
| Autophagy-related protein 2 homolog B OS=Homo sapiens GN=ATG2B PE=1 SV=5              | Q96BY7        | 4              | 5          |         |
| Heterogeneous nuclear ribonucleoprotein U OS=Homo sapiens GN=HNRNPU PE=1 SV=6         | Q00839        | 4              | 4          |         |
| Heterogeneous nuclear ribonucleoproteins A2/B1 OS=Homo sapiens GN=HNRNPA2B1 PE=1 SV=2 | P22626        | 4              |            |         |
| Tubulin beta-2C chain OS=Homo sapiens GN=TUBB2C PE=1 SV=1                             | P68371        | 4              | 9          | 7       |

| Protein peptides                                                                                                  | Accession No. | icPTPRD-D1521A | icPTPRD-WT | Control |
|-------------------------------------------------------------------------------------------------------------------|---------------|----------------|------------|---------|
| Filaggrin-2 OS=Homo sapiens GN=FLG2 PE=1 SV=1                                                                     | Q5D862        | 4              |            | 1       |
| Splicing factor 3B subunit 2 OS=Homo sapiens GN=SF3B2 PE=1 SV=2                                                   | Q13435        | 4              | 6          |         |
| Eukaryotic translation initiation factor 3 subunit B OS=Homo sapiens GN=EIF3B PE=1 SV=3                           | P55884        | 4              |            | 1       |
| Bullous pemphigoid antigen 1 OS=Homo sapiens GN=DST PE=1 SV=4                                                     | Q03001        | 4              | 3          | 4       |
| UDP-N-acetylglucosamine--peptide N-acetylglucosaminyltransferase 110 kDa subunit OS=Homo sapiens GN=OGT PE=1 SV=3 | O15294        | 4              | 2          |         |
| FAM30A protein OS=Homo sapiens GN=FAM30A                                                                          | Q05DB7        | 4              | 2          | 3       |
| Hornerin OS=Homo sapiens GN=HRNR PE=1 SV=2                                                                        | Q86YZ3        | 4              |            |         |
| Ig kappa chain V-II region Cum OS=Homo sapiens PE=1 SV=1                                                          | P01614        | 4              | 2          | 2       |
| 40S ribosomal protein S15a OS=Homo sapiens GN=RPS15A PE=1 SV=2                                                    | P62244        | 4              | 1          | 1       |
| Plakophilin-1 OS=Homo sapiens GN=PKP1 PE=1 SV=2                                                                   | Q13835        | 4              | 1          |         |
| TGF-beta-activated kinase 1 and MAP3K7-binding protein 1 OS=Homo sapiens GN=TAB1 PE=1 SV=1                        | Q15750        | 4              | 4          | 5       |
| E3 ubiquitin-protein ligase RAD18 OS=Homo sapiens GN=RAD18 PE=1 SV=2                                              | Q9NS91        | 4              | 3          | 3       |
| X-ray repair cross-complementing protein 5 OS=Homo sapiens GN=XRCC5 PE=1 SV=3                                     | P13010        | 4              | 1          |         |
| Transcription elongation factor B polypeptide 1 OS=Homo sapiens GN=TCEB1 PE=1 SV=1                                | Q15369        | 4              | 4          | 2       |
| EF-hand calcium-binding domain-containing protein 6 OS=Homo sapiens GN=EFCAB6 PE=1 SV=1                           | Q5THR3        | 4              | 1          | 3       |
| Uncharacterized protein OS=Homo sapiens GN=DSTYK                                                                  | C9J9G6        | 4              | 4          | 2       |
| 60S ribosomal protein L22 OS=Homo sapiens GN=RPL22 PE=1 SV=2                                                      | P35268        | 4              |            | 2       |
| Elongation factor 1-alpha 1 OS=Homo sapiens GN=EEF1A1 PE=1 SV=1                                                   | P68104        | 4              | 1          | 2       |
| E3 SUMO-protein ligase RanBP2 OS=Homo sapiens GN=RANBP2 PE=1 SV=2                                                 | P49792        | 4              |            | 7       |

| Protein peptides                                                                        | Accession No. | icPTPRD-D1521A | icPTPRD-WT | Control |
|-----------------------------------------------------------------------------------------|---------------|----------------|------------|---------|
| Ras-related protein Rab-19 OS=Homo sapiens GN=RAB19 PE=2 SV=2                           | A4D1S5        | 4              | 5          | 2       |
| Caspase 3, apoptosis-related cysteine peptidase, isoform CRA_b OS=Homo sapiens GN=CASP3 | A8MVM1        | 4              | 8          | 5       |
| Gem-associated protein 6 OS=Homo sapiens GN=GEMIN6 PE=1 SV=1                            | Q8WXD5        | 4              |            | 1       |
| Trypsin-1 OS=Homo sapiens GN=PRSS1 PE=1 SV=1                                            | P07477        | 4              | 3          | 1       |
| Actin, cytoplasmic 1 OS=Homo sapiens GN=ACTB PE=1 SV=1                                  | P60709        | 4              | 3          | 4       |
| Receptor-type tyrosine-protein phosphatase F OS=Homo sapiens GN=PTPRF PE=1 SV=2         | P10586        | 4              | 2          |         |
| Rho-associated protein kinase 1 OS=Homo sapiens GN=ROCK1 PE=1 SV=1                      | Q13464        | 4              |            |         |
| Putative tyrosine-protein phosphatase TPTE OS=Homo sapiens GN=TPTE PE=2 SV=3            | P56180        | 4              | 5          | 2       |
| T-complex protein 1 subunit beta OS=Homo sapiens GN=CCT2 PE=1 SV=4                      | P78371        | 4              | 2          | 6       |
| T-complex protein 1 subunit theta OS=Homo sapiens GN=CCT8 PE=1 SV=4                     | P50990        | 4              | 1          | 4       |
| Lamin-B1 OS=Homo sapiens GN=LMNB1 PE=1 SV=2                                             | P20700        | 3              | 2          |         |
| Tryptophanyl-tRNA synthetase, cytoplasmic OS=Homo sapiens GN=WARS PE=1 SV=2             | P23381        | 3              |            |         |
| Leucine-rich repeat-containing protein 42 OS=Homo sapiens GN=LRRC42 PE=1 SV=1           | Q9Y546        | 3              |            |         |
| Thioredoxin OS=Homo sapiens GN=TXN PE=1 SV=3                                            | P10599        | 3              | 2          | 2       |
| E3 ubiquitin-protein ligase RNF180 OS=Homo sapiens GN=RNF180 PE=2 SV=2                  | Q86T96        | 3              | 7          |         |
| NACHT, LRR and PYD domains-containing protein 1 OS=Homo sapiens GN=NLRP1 PE=1 SV=1      | Q9C000        | 3              | 3          | 1       |
| T-complex protein 1 subunit epsilon OS=Homo sapiens GN=CCT5 PE=1 SV=1                   | P48643        | 3              | 1          | 4       |
| Desmoglein-1 OS=Homo sapiens GN=DSG1 PE=1 SV=2                                          | Q02413        | 3              |            |         |
| Protein phosphatase 1B OS=Homo sapiens GN=PPM1B PE=1 SV=1                               | O75688        | 3              | 2          | 4       |

| Protein peptides                                                                                                                    | Accession No. | icPTPRD-D1521A | icPTPRD-WT | Control |
|-------------------------------------------------------------------------------------------------------------------------------------|---------------|----------------|------------|---------|
| Putative small nuclear ribonucleoprotein polypeptide E-like protein 1 OS=Homo sapiens GN=SNRPEL1 PE=5 SV=1                          | Q5VYJ4        | 3              | 1          |         |
| Eukaryotic translation initiation factor 3 subunit G OS=Homo sapiens GN=EIF3G PE=1 SV=2                                             | O75821        | 3              |            | 1       |
| T-complex protein 1 subunit eta OS=Homo sapiens GN=CCT7 PE=1 SV=2                                                                   | Q99832        | 3              | 2          | 4       |
| Transcription intermediary factor 1-beta OS=Homo sapiens GN=TRIM28 PE=1 SV=5                                                        | Q13263        | 3              | 1          | 1       |
| Eukaryotic translation initiation factor 3 subunit F OS=Homo sapiens GN=EIF3F PE=1 SV=1                                             | O00303        | 3              |            | 1       |
| T-complex protein 1 subunit alpha OS=Homo sapiens GN=TCP1 PE=1 SV=1                                                                 | P17987        | 3              | 4          | 4       |
| cDNA FLJ43335 fis, clone NT2RI3006673, highly similar to Receptor-type tyrosine-protein phosphatase F (EC 3.1.3.48) OS=Homo sapiens | B3KWM1        | 3              | 1          |         |
| COL12A1 protein OS=Homo sapiens                                                                                                     | Q86TG9        | 3              | 1          | 3       |
| Cytospin-B OS=Homo sapiens GN=CYTSB PE=1 SV=1                                                                                       | Q5M775        | 3              | 6          | 3       |
| 40S ribosomal protein S20 OS=Homo sapiens GN=RPS20 PE=1 SV=1                                                                        | P60866        | 3              |            |         |
| Zinc finger protein 40 OS=Homo sapiens GN=HIVEP1 PE=1 SV=3                                                                          | P15822        | 3              |            |         |
| Fibromodulin OS=Homo sapiens GN=FMOD PE=1 SV=2                                                                                      | Q06828        | 3              | 3          | 2       |
| 60S ribosomal protein L27 OS=Homo sapiens GN=RPL27 PE=1 SV=2                                                                        | P61353        | 3              |            | 1       |
| 60S ribosomal protein L3 OS=Homo sapiens GN=RPL3 PE=1 SV=2                                                                          | P39023        | 3              |            |         |
| DNA endonuclease RBBP8 OS=Homo sapiens GN=RBBP8 PE=1 SV=2                                                                           | Q99708        | 3              | 3          | 5       |
| Probable ubiquitin carboxyl-terminal hydrolase FAF-X OS=Homo sapiens GN=USP9X PE=1 SV=2                                             | Q93008        | 3              |            |         |
| 40S ribosomal protein S24 OS=Homo sapiens GN=RPS24 PE=1 SV=1                                                                        | P62847        | 3              | 2          |         |
| Probable histone-lysine N-methyltransferase ASH1L OS=Homo sapiens GN=ASH1L PE=1 SV=2                                                | Q9NR48        | 3              | 1          | 3       |
| Non-POU domain-containing octamer-binding protein OS=Homo sapiens GN=NONO PE=1 SV=4                                                 | Q15233        | 3              | 2          |         |

| Protein peptides                                                                   | Accession No. | icPTPRD-D1521A | icPTPRD-WT | Control |
|------------------------------------------------------------------------------------|---------------|----------------|------------|---------|
| 78 kDa glucose-regulated protein OS=Homo sapiens GN=HSPA5 PE=1 SV=2                | P11021        | 3              | 3          | 3       |
| 60S ribosomal protein L12 OS=Homo sapiens GN=RPL12 PE=1 SV=1                       | P30050        | 3              |            | 1       |
| 40S ribosomal protein S19 OS=Homo sapiens GN=RPS19 PE=1 SV=2                       | P39019        | 3              | 1          | 1       |
| 40S ribosomal protein S12 OS=Homo sapiens GN=RPS12 PE=1 SV=3                       | P25398        | 3              |            |         |
| DNA repair protein REV1 OS=Homo sapiens GN=REV1 PE=1 SV=1                          | Q9UBZ9        | 3              |            | 1       |
| Zinc finger protein 202 OS=Homo sapiens GN=ZNF202 PE=1 SV=4                        | O95125        | 3              |            |         |
| 40S ribosomal protein S13 OS=Homo sapiens GN=RPS13 PE=1 SV=2                       | P62277        | 3              | 1          |         |
| Zinc finger protein 510 OS=Homo sapiens GN=ZNF510 PE=2 SV=1                        | Q9Y2H8        | 3              | 6          | 3       |
| 60S ribosomal protein L11 OS=Homo sapiens GN=RPL11 PE=1 SV=2                       | P62913        | 3              | 2          | 1       |
| Pre-mRNA-processing factor 19 OS=Homo sapiens GN=PRPF19 PE=1 SV=1                  | Q9UMS4        | 3              | 3          |         |
| Phosphatidylinositol 4-kinase alpha OS=Homo sapiens GN=PI4KA PE=1 SV=3             | P42356        | 3              | 1          | 1       |
| 60S ribosomal protein L17 OS=Homo sapiens GN=RPL17 PE=1 SV=3                       | P18621        | 3              |            |         |
| Protein arginine N-methyltransferase 1 OS=Homo sapiens GN=PRMT1 PE=1 SV=2          | Q99873        | 3              |            | 2       |
| 26S protease regulatory subunit 7 OS=Homo sapiens GN=PSMC2 PE=1 SV=3               | P35998        | 3              |            | 1       |
| PiggyBac transposable element-derived protein 2 OS=Homo sapiens GN=PGBD2 PE=2 SV=1 | Q6P3X8        | 3              | 2          | 5       |
| Putative uncharacterized protein DKFZp686G04235 OS=Homo sapiens GN=DKFZp686G04235  | Q63HL4        | 3              |            |         |
| 40S ribosomal protein S8 OS=Homo sapiens GN=RPS8 PE=1 SV=2                         | P62241        | 2              | 1          |         |
| Pulmonary surfactant-associated protein D OS=Homo sapiens GN=SFTPD PE=1 SV=2       | P35247        | 2              |            |         |
| 60S acidic ribosomal protein P0 OS=Homo sapiens GN=RPLP0 PE=1 SV=1                 | P05388        | 2              | 1          | 1       |

| Protein peptides                                                                           | Accession No. | icPTPRD-D1521A | icPTPRD-WT | Control |
|--------------------------------------------------------------------------------------------|---------------|----------------|------------|---------|
| Heat shock protein HSP 90-beta OS=Homo sapiens GN=HSP90AB1 PE=1 SV=4                       | P08238        | 2              | 2          | 2       |
| POTE ankyrin domain family member B OS=Homo sapiens GN=POTEB PE=2 SV=1                     | Q6S5H4        | 2              |            |         |
| Solute carrier family 22 member 11 OS=Homo sapiens GN=SLC22A11 PE=1 SV=1                   | Q9NSA0        | 2              | 1          | 1       |
| Cell division protein kinase 18 OS=Homo sapiens GN=CDK18 PE=1 SV=3                         | Q07002        | 2              |            |         |
| Sp110 nuclear body protein OS=Homo sapiens GN=SP110 PE=1 SV=5                              | Q9HB58        | 2              | 3          | 3       |
| TGF-beta-activated kinase 1 and MAP3K7-binding protein 3 OS=Homo sapiens GN=TAB3 PE=1 SV=2 | Q8N5C8        | 2              | 3          | 2       |
| 40S ribosomal protein S25 OS=Homo sapiens GN=RPS25 PE=1 SV=1                               | P62851        | 2              |            |         |
| 40S ribosomal protein S23 OS=Homo sapiens GN=RPS23 PE=1 SV=3                               | P62266        | 2              | 1          |         |
| 40S ribosomal protein S7 OS=Homo sapiens GN=RPS7 PE=1 SV=1                                 | P62081        | 2              | 2          |         |
| 40S ribosomal protein S3a OS=Homo sapiens GN=RPS3A PE=1 SV=2                               | P61247        | 2              | 1          |         |
| Putative uncharacterized protein OS=Homo sapiens                                           | Q2NKY6        | 2              | 1          | 1       |
| X-ray repair cross-complementing protein 6 OS=Homo sapiens GN=XRCC6 PE=1 SV=2              | P12956        | 2              | 1          | 1       |
| 40S ribosomal protein S28 OS=Homo sapiens GN=RPS28 PE=1 SV=1                               | P62857        | 2              |            | 1       |
| TGF-beta-activated kinase 1 and MAP3K7-binding protein 2 OS=Homo sapiens GN=TAB2 PE=1 SV=1 | Q9NYJ8        | 2              | 3          |         |
| 26S proteasome non-ATPase regulatory subunit 14 OS=Homo sapiens GN=PSMD14 PE=1 SV=1        | O00487        | 2              |            |         |
| Cytoplasmic dynein 1 heavy chain 1 OS=Homo sapiens GN=DYNC1H1 PE=1 SV=5                    | Q14204        | 2              | 3          | 16      |
| Interleukin enhancer-binding factor 2 OS=Homo sapiens GN=ILF2 PE=1 SV=2                    | Q12905        | 2              | 3          |         |
| Importin-8 OS=Homo sapiens GN=IPO8 PE=1 SV=2                                               | O15397        | 2              | 4          |         |
| Importin-5 OS=Homo sapiens GN=IPO5 PE=1 SV=4                                               | O00410        | 2              |            |         |

| Protein peptides                                                                                              | Accession No. | icPTPRD-D1521A | icPTPRD-WT | Control |
|---------------------------------------------------------------------------------------------------------------|---------------|----------------|------------|---------|
| Syntaxin-binding protein 3 OS=Homo sapiens GN=STXBP3 PE=1 SV=2                                                | O00186        | 2              | 2          |         |
| Isoleucyl-tRNA synthetase, cytoplasmic OS=Homo sapiens GN=IARS PE=1 SV=2                                      | P41252        | 2              | 3          | 1       |
| Taste receptor type 2 member 42 OS=Homo sapiens GN=TAS2R42 PE=2 SV=1                                          | Q7RTR8        | 2              |            | 1       |
| Contactin-1 OS=Homo sapiens GN=CNTN1 PE=1 SV=1                                                                | Q12860        | 2              |            |         |
| Putative HIN1-like protein OS=Homo sapiens GN=HIN1L PE=5 SV=1                                                 | Q7RTX8        | 2              | 3          | 1       |
| Putative heat shock protein HSP 90-beta 2 OS=Homo sapiens GN=HSP90AB2P PE=1 SV=2                              | Q58FF8        | 2              | 2          | 4       |
| 26S proteasome non-ATPase regulatory subunit 1 OS=Homo sapiens GN=PSMD1 PE=1 SV=2                             | Q99460        | 2              |            | 3       |
| PHD and RING finger domain-containing protein 1 OS=Homo sapiens GN=PHRF1 PE=1 SV=3                            | Q9P1Y6        | 2              |            |         |
| Phosphatidylinositol 3,4,5-trisphosphate-dependent Rac exchanger 2 protein OS=Homo sapiens GN=PREX2 PE=2 SV=1 | Q70Z35        | 2              |            |         |
| Chromosome-associated kinesin KIF4A OS=Homo sapiens GN=KIF4A PE=1 SV=3                                        | O95239        | 2              |            |         |
| T-complex protein 1 subunit delta OS=Homo sapiens GN=CCT4 PE=1 SV=4                                           | P50991        | 2              | 3          | 4       |
| 26S proteasome non-ATPase regulatory subunit 2 OS=Homo sapiens GN=PSMD2 PE=1 SV=3                             | Q13200        | 2              |            |         |
| 26S proteasome non-ATPase regulatory subunit 3 OS=Homo sapiens GN=PSMD3 PE=1 SV=2                             | O43242        | 2              |            | 2       |
| Phosphatidylethanolamine-binding protein 1 OS=Homo sapiens GN=PEBP1 PE=1 SV=3                                 | P30086        | 2              | 2          | 2       |
| Cytoplasmic dynein 2 heavy chain 1 OS=Homo sapiens GN=DYNC2H1 PE=1 SV=4                                       | Q8NCM8        | 2              |            |         |
| Rotatin OS=Homo sapiens GN=RTTN PE=1 SV=3                                                                     | Q86VV8        | 2              | 1          |         |
| Coiled-coil domain-containing protein 58 OS=Homo sapiens GN=CCDC58 PE=1 SV=1                                  | Q4VC31        | 2              | 1          | 1       |
| PHD finger protein 20 OS=Homo sapiens GN=PHF20 PE=1 SV=2                                                      | Q9BVI0        | 2              |            | 1       |
| Protein tyrosine phosphatase, receptor type, F isoform 2 variant (Fragment) OS=Homo sapiens                   | Q59FI2        | 2              |            |         |

| Protein peptides                                                                                        | Accession No. | icPTPRD-D1521A | icPTPRD-WT | Control |
|---------------------------------------------------------------------------------------------------------|---------------|----------------|------------|---------|
| Cleavage stimulation factor subunit 3 OS=Homo sapiens GN=CSTF3 PE=1 SV=1                                | Q12996        | 2              |            |         |
| 40S ribosomal protein S16 OS=Homo sapiens GN=RPS16 PE=1 SV=2                                            | P62249        | 2              |            | 2       |
| Putative heat shock protein HSP 90-alpha A5 OS=Homo sapiens GN=HSP90AA5P PE=1 SV=1                      | Q58FG0        | 2              | 1          | 1       |
| Eukaryotic translation initiation factor 3 subunit E OS=Homo sapiens GN=EIF3E PE=1 SV=1                 | P60228        | 2              | 2          |         |
| Vacuolar protein sorting-associated protein 8 homolog OS=Homo sapiens GN=VPS8 PE=1 SV=3                 | Q8N3P4        | 2              |            |         |
| Homeobox protein Hox-A5 OS=Homo sapiens GN=HOXA5 PE=1 SV=2                                              | P20719        | 2              | 4          | 1       |
| Eukaryotic initiation factor 4A-I OS=Homo sapiens GN=EIF4A1 PE=1 SV=1                                   | P60842        | 2              |            | 6       |
| A disintegrin and metalloproteinase with thrombospondin motifs 15 OS=Homo sapiens GN=ADAMTS15 PE=2 SV=1 | Q8TE58        | 2              |            |         |
| Actin, aortic smooth muscle OS=Homo sapiens GN=ACTA2 PE=1 SV=1                                          | P62736        | 2              | 5          | 5       |
| Uncharacterized protein C19orf68 OS=Homo sapiens GN=C19orf68 PE=1 SV=2                                  | Q86X18        | 2              | 2          | 3       |
| Histone-lysine N-methyltransferase SETD2 OS=Homo sapiens GN=SETD2 PE=1 SV=3                             | Q9BYW2        | 2              |            |         |
| Amiloride-sensitive cation channel 2, neuronal OS=Homo sapiens GN=ACCN2 PE=1 SV=3                       | P78348        | 2              | 1          |         |
| Neuropilin-1 OS=Homo sapiens GN=NRP1 PE=1 SV=3                                                          | O14786        | 2              |            |         |
| Ankyrin repeat and FYVE domain-containing protein 1 OS=Homo sapiens GN=ANKFY1 PE=1 SV=2                 | Q9P2R3        | 2              | 1          |         |
| Uncharacterized protein C10orf82 OS=Homo sapiens GN=C10orf82 PE=2 SV=2                                  | Q8WW14        | 2              | 2          |         |
| Multifunctional protein ADE2 OS=Homo sapiens GN=PAICS PE=1 SV=3                                         | P22234        | 2              | 1          | 1       |
| UDP-N-acetylhexosamine pyrophosphorylase-like protein 1 OS=Homo sapiens GN=UAP1L1 PE=2 SV=2             | Q3KQV9        | 2              |            |         |
| Enhancer of rudimentary homolog OS=Homo sapiens GN=ERH PE=1 SV=1                                        | P84090        | 2              | 1          |         |
| Aspartyl-tRNA synthetase, cytoplasmic OS=Homo sapiens GN=DARS PE=1 SV=2                                 | P14868        | 2              |            | 1       |



| Protein peptides                                                                         | Accession No. | icPTPRD-D1521A | icPTPRD-WT | Control |
|------------------------------------------------------------------------------------------|---------------|----------------|------------|---------|
| Serine/threonine-protein kinase 38-like OS=Homo sapiens GN=STK38L PE=1 SV=3              | Q9Y2H1        | 2              | 3          | 4       |
| DNA damage-binding protein 1 OS=Homo sapiens GN=DDB1 PE=1 SV=1                           | Q16531        | 2              | 1          |         |
| Insulin-like growth factor 2 mRNA-binding protein 1 OS=Homo sapiens GN=IGF2BP1 PE=1 SV=2 | Q9NZI8        | 2              | 2          | 1       |
| Histone H2B type 1-B OS=Homo sapiens GN=HIST1H2BB PE=1 SV=2                              | P33778        | 2              | 1          |         |
| Ubiquitin-60S ribosomal protein L40 OS=Homo sapiens GN=UBA52 PE=1 SV=2                   | P62987        | 2              | 2          | 1       |
| Eukaryotic translation initiation factor 3 subunit L OS=Homo sapiens GN=EIF3L PE=1 SV=1  | Q9Y262        | 2              | 2          | 1       |
| ATP-dependent RNA helicase DQX1 OS=Homo sapiens GN=DQX1 PE=2 SV=2                        | Q8TE96        | 2              |            |         |
| Eukaryotic translation initiation factor 3 subunit I OS=Homo sapiens GN=EIF3I PE=1 SV=1  | Q13347        | 2              |            |         |
| U1 small nuclear ribonucleoprotein A OS=Homo sapiens GN=SNRPA PE=1 SV=3                  | P09012        | 2              |            |         |
| Bcl-2-associated transcription factor 1 OS=Homo sapiens GN=BCLAF1 PE=1 SV=2              | Q9NYF8        | 2              |            |         |
| Splicing factor 45 OS=Homo sapiens GN=RBM17 PE=1 SV=1                                    | Q96I25        | 2              |            |         |
| Myosin light chain kinase, smooth muscle OS=Homo sapiens GN=MYLK PE=1 SV=4               | Q15746        | 2              | 1          | 4       |
| Gem-associated protein 7 OS=Homo sapiens GN=GEMIN7 PE=1 SV=1                             | Q9H840        | 2              | 1          | 1       |
| Small nuclear ribonucleoprotein G-like protein OS=Homo sapiens PE=3 SV=2                 | A8MWD9        | 2              | 2          | 2       |
| Small nuclear ribonucleoprotein F OS=Homo sapiens GN=SNRPF PE=1 SV=1                     | P62306        | 2              |            | 1       |
| B-cell lymphoma/leukemia 11B OS=Homo sapiens GN=BCL11B PE=1 SV=1                         | Q9C0K0        | 2              | 1          | 1       |
| Prelamin-A/C OS=Homo sapiens GN=LMNA PE=1 SV=1                                           | P02545        | 2              |            |         |
| U2-associated protein SR140 OS=Homo sapiens GN=SR140 PE=1 SV=2                           | O15042        | 2              | 2          |         |
| Echinoderm microtubule-associated protein-like 6 OS=Homo sapiens GN=EML6 PE=2 SV=2       | Q6ZMW3        | 2              |            |         |

| Protein peptides                                                                     | Accession No. | icPTPRD-D1521A | icPTPRD-WT | Control |
|--------------------------------------------------------------------------------------|---------------|----------------|------------|---------|
| Pre-mRNA branch site protein p14 OS=Homo sapiens GN=SF3B14 PE=1 SV=1                 | Q9Y3B4        | 2              | 3          |         |
| MAP kinase-activated protein kinase 5 OS=Homo sapiens GN=MAPKAPK5 PE=1 SV=2          | Q8IW41        | 2              |            |         |
| 60S ribosomal protein L23 OS=Homo sapiens GN=RPL23 PE=1 SV=1                         | P62829        | 2              | 1          |         |
| 60S ribosomal protein L23a OS=Homo sapiens GN=RPL23A PE=1 SV=1                       | P62750        | 2              | 1          | 1       |
| Pre-mRNA-processing factor 6 OS=Homo sapiens GN=PRPF6 PE=1 SV=1                      | O94906        | 2              | 2          |         |
| 60S ribosomal protein L26-like 1 OS=Homo sapiens GN=RPL26L1 PE=1 SV=1                | Q9UNX3        | 2              |            |         |
| Transitional endoplasmic reticulum ATPase OS=Homo sapiens GN=VCP PE=1 SV=4           | P55072        | 2              | 1          |         |
| CD2 antigen cytoplasmic tail-binding protein 2 OS=Homo sapiens GN=CD2BP2 PE=1 SV=1   | O95400        | 2              |            |         |
| Protein KIAA1967 OS=Homo sapiens GN=KIAA1967 PE=1 SV=2                               | Q8N163        | 2              |            |         |
| 6-pyruvoyl tetrahydrobiopterin synthase OS=Homo sapiens GN=PTS PE=1 SV=1             | Q03393        | 2              |            |         |
| MORC family CW-type zinc finger protein 2 OS=Homo sapiens GN=MORC2 PE=1 SV=2         | Q9Y6X9        | 2              | 6          |         |
| Carboxymethylenebutenolidase homolog OS=Homo sapiens GN=CMBL PE=1 SV=1               | Q96DG6        | 2              |            | 3       |
| Desmin OS=Homo sapiens GN=DES PE=1 SV=3                                              | P17661        | 2              |            | 2       |
| Spindlin-2A OS=Homo sapiens GN=SPIN2A PE=1 SV=3                                      | Q99865        | 2              |            |         |
| 60S ribosomal protein L9 OS=Homo sapiens GN=RPL9 PE=1 SV=1                           | P32969        | 2              |            |         |
| 60S acidic ribosomal protein P0-like OS=Homo sapiens GN=RPLP0P6 PE=5 SV=1            | Q8NHW5        | 2              | 1          | 1       |
| Mitogen-activated protein kinase kinase kinase 4 OS=Homo sapiens GN=MAP4K4 PE=1 SV=2 | O95819        | 2              |            |         |
| Uncharacterized protein OS=Homo sapiens GN=ASB18                                     | C9JFL4        | 2              |            |         |
| Gem (Nuclear organelle) associated protein 4 OS=Homo sapiens GN=GEMIN4               | Q8WUM5        | 2              | 4          | 3       |

| Protein peptides                                                                                                      | Accession No. | icPTPRD-D1521A | icPTPRD-WT | Control |
|-----------------------------------------------------------------------------------------------------------------------|---------------|----------------|------------|---------|
| D-3-phosphoglycerate dehydrogenase OS=Homo sapiens GN=PHGDH PE=1 SV=4                                                 | O43175        | 2              |            | 5       |
| 60S ribosomal protein L7 OS=Homo sapiens GN=RPL7 PE=1 SV=1                                                            | P18124        | 2              | 2          | 2       |
| Inactive phospholipase C-like protein 2 OS=Homo sapiens GN=PLCL2 PE=1 SV=2                                            | Q9UPR0        | 1              |            |         |
| Inactive Ufm1-specific protease 1 OS=Homo sapiens GN=UFSP1 PE=2 SV=2                                                  | Q6NVU6        | 1              |            |         |
| Inactive ubiquitin carboxyl-terminal hydrolase 50 OS=Homo sapiens GN=USP50 PE=2 SV=1                                  | Q70EL3        | 1              |            | 1       |
| Maltase-glucoamylase (Fragment) OS=Homo sapiens GN=MGAM                                                               | Q8TE24        | 1              | 1          |         |
| Heat shock 70 kDa protein 4 OS=Homo sapiens GN=HSPA4 PE=1 SV=4                                                        | P34932        | 1              |            | 1       |
| Heat shock protein 105 kDa OS=Homo sapiens GN=HSPH1 PE=1 SV=1                                                         | Q92598        | 1              |            |         |
| Heat shock protein beta-1 OS=Homo sapiens GN=HSPB1 PE=1 SV=2                                                          | P04792        | 1              |            |         |
| Heat-stable enterotoxin receptor OS=Homo sapiens GN=GUCY2C PE=1 SV=2                                                  | P25092        | 1              |            |         |
| Hepatocyte growth factor receptor OS=Homo sapiens GN=MET PE=1 SV=4                                                    | P08581        | 1              |            |         |
| Hermansky-Pudlak syndrome 5 protein OS=Homo sapiens GN=HPS5 PE=1 SV=2                                                 | Q9UPZ3        | 1              |            |         |
| Heterogeneous nuclear ribonucleoprotein D0 OS=Homo sapiens GN=HNRNPD PE=1 SV=1                                        | Q14103        | 1              | 1          |         |
| Heterogeneous nuclear ribonucleoprotein K OS=Homo sapiens GN=HNRNPK PE=1 SV=1                                         | P61978        | 1              | 2          | 1       |
| Heterogeneous nuclear ribonucleoprotein L OS=Homo sapiens GN=HNRNPL PE=1 SV=2                                         | P14866        | 1              |            | 1       |
| High affinity cAMP-specific and IBMX-insensitive 3',5'-cyclic phosphodiesterase 8B OS=Homo sapiens GN=PDE8B PE=1 SV=2 | O95263        | 1              |            |         |
| Histone deacetylase 1 OS=Homo sapiens GN=HDAC1 PE=1 SV=1                                                              | Q13547        | 1              |            |         |
| Histone H2A type 1-B/E OS=Homo sapiens GN=HIST1H2AB PE=1 SV=2                                                         | P04908        | 1              | 3          |         |
| Histone-lysine N-methyltransferase MLL4 OS=Homo sapiens GN=WBP7 PE=1 SV=1                                             | Q9UMN6        | 1              |            |         |

| Protein peptides                                                            | Accession No. | icPTPRD-D1521A | icPTPRD-WT | Control |
|-----------------------------------------------------------------------------|---------------|----------------|------------|---------|
| Histone H3.1t OS=Homo sapiens GN=HIST3H3 PE=1 SV=3                          | Q16695        | 1              |            |         |
| Importin subunit beta-1 OS=Homo sapiens GN=KPNB1 PE=1 SV=2                  | Q14974        | 1              |            | 2       |
| Histone-lysine N-methyltransferase MLL3 OS=Homo sapiens GN=MLL3 PE=1 SV=3   | Q8NEZ4        | 1              |            |         |
| HIV Tat-specific factor 1 OS=Homo sapiens GN=HTATSF1 PE=1 SV=1              | O43719        | 1              |            |         |
| Homeobox protein cut-like 1 OS=Homo sapiens GN=CUX1 PE=1 SV=3               | P39880        | 1              |            |         |
| Homeobox protein Meis1 OS=Homo sapiens GN=MEIS1 PE=1 SV=1                   | O00470        | 1              |            |         |
| Homeodomain-interacting protein kinase 4 OS=Homo sapiens GN=HIPK4 PE=2 SV=1 | Q8NE63        | 1              |            |         |
| Homer protein homolog 1 OS=Homo sapiens GN=HOMER1 PE=1 SV=2                 | Q86YM7        | 1              |            |         |
| Homer protein homolog 2 OS=Homo sapiens GN=HOMER2 PE=1 SV=1                 | Q9NSB8        | 1              |            |         |
| Hsp90 co-chaperone Cdc37 OS=Homo sapiens GN=CDC37 PE=1 SV=1                 | Q16543        | 1              | 1          | 1       |
| Huntingtin OS=Homo sapiens GN=HTT PE=1 SV=2                                 | P42858        | 1              |            |         |
| Huntingtin-associated protein 1 OS=Homo sapiens GN=HAP1 PE=1 SV=3           | P54257        | 1              |            |         |
| Hypermethylated in cancer 1 protein OS=Homo sapiens GN=HIC1 PE=1 SV=5       | Q14526        | 1              | 1          |         |
| IL-18 receptor beta splice variant OS=Homo sapiens                          | Q2QDE5        | 1              |            | 3       |
| Immunoglobulin superfamily member 2 OS=Homo sapiens GN=CD101 PE=1 SV=2      | Q93033        | 1              |            |         |
| Histone H2A.V OS=Homo sapiens GN=H2AFV PE=1 SV=3                            | Q71UI9        | 1              |            |         |
| Nesprin-2 OS=Homo sapiens GN=SYNE2 PE=1 SV=3                                | Q8WXH0        | 1              | 1          |         |
| Nuclear receptor co-repressor OS=Homo sapiens                               | Q7Z516        | 1              | 1          |         |
| Nuclear receptor coactivator 5 OS=Homo sapiens GN=NCOA5 PE=1 SV=2           | Q9HCD5        | 1              |            |         |

| Protein peptides                                                                                                  | Accession No. | icPTPRD-D1521A | icPTPRD-WT | Control |
|-------------------------------------------------------------------------------------------------------------------|---------------|----------------|------------|---------|
| Nuclear pore complex protein Nup160 OS=Homo sapiens GN=NUP160 PE=1 SV=3                                           | Q12769        | 1              |            |         |
| NTPase KAP family P-loop domain-containing protein 1 OS=Homo sapiens GN=NKPD1 PE=2 SV=1                           | Q17RQ9        | 1              |            |         |
| Non-histone chromosomal protein HMG-14 OS=Homo sapiens GN=HMGN1 PE=1 SV=3                                         | P05114        | 1              |            |         |
| Nipped-B-like protein OS=Homo sapiens GN=NIPBL PE=1 SV=2                                                          | Q6KC79        | 1              |            |         |
| NF-kappa-B inhibitor-like protein 1 OS=Homo sapiens GN=NFKBIL1 PE=1 SV=1                                          | Q9UBC1        | 1              |            |         |
| Neuronal protein NP25 OS=Homo sapiens                                                                             | Q7Z517        | 1              |            |         |
| Neurolysin, mitochondrial OS=Homo sapiens GN=NLN PE=1 SV=1                                                        | Q9BYT8        | 1              |            |         |
| Neuroblast differentiation-associated protein AHNAK OS=Homo sapiens GN=AHNAK PE=1 SV=2                            | Q09666        | 1              |            | 1       |
| Myosin-VIIb OS=Homo sapiens GN=MYO7B PE=2 SV=2                                                                    | Q6PIF6        | 1              |            |         |
| Netrin receptor UNC5A OS=Homo sapiens GN=UNC5A PE=2 SV=3                                                          | Q6ZN44        | 1              |            |         |
| Nucleolar protein 3 (Apoptosis repressor with CARD domain), isoform CRA_a OS=Homo sapiens GN=NOL3                 | B4DFL0        | 1              | 1          |         |
| NEDD8-activating enzyme E1 catalytic subunit OS=Homo sapiens GN=UBA3 PE=1 SV=2                                    | Q8TBC4        | 1              |            |         |
| Necdin OS=Homo sapiens GN=NDN PE=1 SV=1                                                                           | Q99608        | 1              |            |         |
| Nebulin OS=Homo sapiens GN=NEB PE=1 SV=4                                                                          | P20929        | 1              | 1          | 1       |
| Nck-associated protein 5 OS=Homo sapiens GN=NCKAP5 PE=1 SV=2                                                      | O14513        | 1              |            |         |
| NADH dehydrogenase [ubiquinone] 1 alpha subcomplex subunit 10, mitochondrial OS=Homo sapiens GN=NDUFA10 PE=1 SV=1 | O95299        | 1              |            |         |
| NACHT, LRR and PYD domains-containing protein 11 OS=Homo sapiens GN=NLRP11 PE=2 SV=2                              | P59045        | 1              |            |         |
| NACHT, LRR and PYD domains-containing protein 10 OS=Homo sapiens GN=NLRP10 PE=1 SV=1                              | Q86W26        | 1              |            |         |
| N-acetylglucosamine kinase OS=Homo sapiens GN=NAGK                                                                | B4DLZ5        | 1              |            |         |

| Protein peptides                                                                                         | Accession No. | icPTPRD-D1521A | icPTPRD-WT | Control |
|----------------------------------------------------------------------------------------------------------|---------------|----------------|------------|---------|
| 0                                                                                                        | Q76KP1        | 1              |            |         |
| Myotubularin-related protein 4 OS=Homo sapiens GN=MTMR4 PE=2 SV=2                                        | Q9NYA4        | 1              | 1          |         |
| Lysosomal acid phosphatase OS=Homo sapiens GN=ACP2 PE=1 SV=3                                             | P11117        | 1              |            |         |
| Netrin receptor UNC5C OS=Homo sapiens GN=UNC5C PE=1 SV=2                                                 | O95185        | 1              | 1          | 5       |
| Peptide chain release factor 1, mitochondrial OS=Homo sapiens GN=MTRF1 PE=1 SV=2                         | O75570        | 1              |            |         |
| Piwi-like protein 2 OS=Homo sapiens GN=PIWIL2 PE=2 SV=1                                                  | Q8TC59        | 1              |            |         |
| Phosphorylase b kinase gamma catalytic chain, skeletal muscle isoform OS=Homo sapiens GN=PHKG1 PE=2 SV=3 | Q16816        | 1              |            |         |
| Phosphoinositol 3-phosphate-binding protein 3 (Fragment) OS=Homo sapiens GN=PLEKHA6                      | A5XEJ4        | 1              |            |         |
| Phosphatidylinositol transfer protein, beta (Fragment) OS=Homo sapiens GN=PITPNB                         | B3KYB7        | 1              |            |         |
| Phosphate-regulating neutral endopeptidase OS=Homo sapiens GN=PHEX PE=1 SV=1                             | P78562        | 1              |            |         |
| PHD finger protein 3 OS=Homo sapiens GN=PHF3 PE=1 SV=3                                                   | Q92576        | 1              |            |         |
| PHD finger protein 11 OS=Homo sapiens GN=PHF11 PE=1 SV=3                                                 | Q9UIL8        | 1              |            |         |
| Peripherin OS=Homo sapiens GN=PRPH PE=1 SV=2                                                             | P41219        | 1              | 1          | 4       |
| Peripheral-type benzodiazepine receptor-associated protein 1 OS=Homo sapiens GN=BZRAP1 PE=1 SV=2         | O95153        | 1              | 2          | 4       |
| Pericentriolar material 1 protein OS=Homo sapiens GN=PCM1 PE=1 SV=4                                      | Q15154        | 1              |            |         |
| Peregrin OS=Homo sapiens GN=BRPF1 PE=1 SV=2                                                              | P55201        | 1              |            |         |
| Nuclease-sensitive element-binding protein 1 OS=Homo sapiens GN=YBX1 PE=1 SV=3                           | P67809        | 1              |            | 1       |
| Peptidyl-prolyl cis-trans isomerase E OS=Homo sapiens GN=PPIE PE=1 SV=1                                  | Q9UNP9        | 1              |            |         |
| Nucleolar GTP-binding protein 1 OS=Homo sapiens GN=GTPBP4 PE=1 SV=3                                      | Q9BZE4        | 1              |            |         |

| Protein peptides                                                                              | Accession No. | icPTPRD-D1521A | icPTPRD-WT | Control |
|-----------------------------------------------------------------------------------------------|---------------|----------------|------------|---------|
| PAX-9 protein (Fragment) OS=Homo sapiens GN=PAX-9                                             | O95616        | 1              | 2          |         |
| Partner of Y14 and mago OS=Homo sapiens GN=WIBG PE=1 SV=1                                     | Q9BRP8        | 1              |            |         |
| Paladin OS=Homo sapiens GN=PALD PE=1 SV=3                                                     | Q9ULE6        | 1              |            |         |
| Otolin-1 OS=Homo sapiens GN=OTOL1 PE=3 SV=1                                                   | A6NHN0        | 1              |            |         |
| Otoferlin OS=Homo sapiens GN=OTOF PE=1 SV=3                                                   | Q9HC10        | 1              | 3          |         |
| Orexin receptor type 1 OS=Homo sapiens GN=HCRTR1 PE=1 SV=2                                    | O43613        | 1              |            |         |
| Olfactory receptor 8A1 OS=Homo sapiens GN=OR8A1 PE=2 SV=2                                     | Q8NGG7        | 1              |            |         |
| Olfactory receptor 13C5 OS=Homo sapiens GN=OR13C5 PE=2 SV=1                                   | Q8NGS8        | 1              |            |         |
| Numb-like protein OS=Homo sapiens GN=NUMBL PE=1 SV=1                                          | Q9Y6R0        | 1              |            |         |
| Nucleosome-remodeling factor subunit BPTF OS=Homo sapiens GN=BPTF PE=1 SV=3                   | Q12830        | 1              |            |         |
| Myosin-1b OS=Homo sapiens GN=MYO1B PE=1 SV=3                                                  | O43795        | 1              |            | 1       |
| Peptidyl-prolyl cis-trans isomerase FKBP4 OS=Homo sapiens GN=FKBP4 PE=1 SV=3                  | Q02790        | 1              |            |         |
| Keratin-81-like protein OS=Homo sapiens PE=2 SV=3                                             | A6NCN2        | 1              |            |         |
| Liprin-alpha-1 OS=Homo sapiens GN=PPFIA1 PE=1 SV=1                                            | Q13136        | 1              |            |         |
| Lipopolysaccharide-responsive and beige-like anchor protein OS=Homo sapiens GN=LRBA PE=1 SV=4 | P50851        | 1              |            |         |
| Leucine-rich repeat-containing protein LOC400891 OS=Homo sapiens PE=2 SV=2                    | Q6ZQY2        | 1              |            |         |
| Leucine-rich repeat-containing protein 15 OS=Homo sapiens GN=LRRC15 PE=1 SV=1                 | Q8TF66        | 1              |            |         |
| Leucine-rich repeat LGI family member 2 OS=Homo sapiens GN=LGI2 PE=1 SV=1                     | Q8N0V4        | 1              |            |         |
| Leucine-rich repeat and death domain-containing protein OS=Homo sapiens GN=LRDD PE=1 SV=2     | Q9HB75        | 1              |            |         |

| Protein peptides                                                                               | Accession No. | icPTPRD-D1521A | icPTPRD-WT | Control |
|------------------------------------------------------------------------------------------------|---------------|----------------|------------|---------|
| Leptin receptor OS=Homo sapiens GN=LEPR PE=1 SV=2                                              | P48357        | 1              |            |         |
| Left-right determination factor 1 OS=Homo sapiens GN=LEFTY1 PE=2 SV=1                          | O75610        | 1              |            |         |
| Laminin subunit gamma-2 OS=Homo sapiens GN=LAMC2 PE=1 SV=2                                     | Q13753        | 1              |            |         |
| Kinesin-like protein KIFC2 OS=Homo sapiens GN=KIFC2 PE=1 SV=1                                  | Q96AC6        | 1              |            |         |
| Myotilin OS=Homo sapiens GN=MYOT PE=1 SV=2                                                     | Q9UBF9        | 1              |            |         |
| Kinesin-like protein KIF15 OS=Homo sapiens GN=KIF15 PE=1 SV=1                                  | Q9NS87        | 1              |            | 1       |
| Low-density lipoprotein receptor-related protein 10 OS=Homo sapiens GN=LRP10 PE=1 SV=2         | Q7Z4F1        | 1              |            | 1       |
| Kelch-like protein 20 OS=Homo sapiens GN=KLHL20 PE=1 SV=4                                      | Q9Y2M5        | 1              |            |         |
| Joubertin OS=Homo sapiens GN=AH11 PE=1 SV=1                                                    | Q8N157        | 1              |            |         |
| Iporin OS=Homo sapiens GN=RUSC2 PE=1 SV=2                                                      | Q8N2Y8        | 1              |            |         |
| Interleukin-27 subunit alpha OS=Homo sapiens GN=IL27 PE=1 SV=2                                 | Q8NEV9        | 1              |            |         |
| Interferon-induced protein with tetratricopeptide repeats 2 OS=Homo sapiens GN=IFIT2 PE=1 SV=1 | P09913        | 1              |            |         |
| Interferon kappa OS=Homo sapiens GN=IFNK PE=1 SV=1                                             | Q9P0W0        | 1              |            |         |
| Inter-alpha-trypsin inhibitor heavy chain H5 OS=Homo sapiens GN=ITIH5 PE=2 SV=2                | Q86UX2        | 1              |            |         |
| Integrin alpha-2 OS=Homo sapiens GN=ITGA2 PE=1 SV=1                                            | P17301        | 1              | 1          | 1       |
| Insulin receptor substrate 4 OS=Homo sapiens GN=IRS4 PE=1 SV=1                                 | O14654        | 1              |            |         |
| Inositol polyphosphate 1-phosphatase OS=Homo sapiens GN=INPP1 PE=1 SV=1                        | P49441        | 1              | 1          |         |
| Inositol 1,4,5-trisphosphate receptor type 2 OS=Homo sapiens GN=ITPR2 PE=1 SV=2                | Q14571        | 1              |            |         |
| Kinesin-like protein KIF3C OS=Homo sapiens GN=KIF3C PE=1 SV=3                                  | O14782        | 1              |            | 1       |



| Protein peptides                                                                              | Accession No. | icPTPRD-D1521A | icPTPRD-WT | Control |
|-----------------------------------------------------------------------------------------------|---------------|----------------|------------|---------|
| Zymogen granule membrane protein 16 OS=Homo sapiens GN=ZG16 PE=1 SV=1                         | O60844        | 1              |            |         |
| Myosin-9 OS=Homo sapiens GN=MYH9 PE=1 SV=4                                                    | P35579        | 1              | 1          | 2       |
| Myosin regulatory light chain 12A OS=Homo sapiens GN=MYL12A PE=1 SV=2                         | P19105        | 1              |            |         |
| Myoneurin OS=Homo sapiens GN=MYNN PE=1 SV=1                                                   | Q9NPC7        | 1              |            |         |
| Myomegalin OS=Homo sapiens GN=PDE4DIP PE=1 SV=1                                               | Q5VU43        | 1              | 1          |         |
| Myelin transcription factor 1-like protein OS=Homo sapiens GN=MYT1L PE=2 SV=2                 | Q9UL68        | 1              |            |         |
| Myelin gene regulatory factor OS=Homo sapiens GN=MRF PE=1 SV=3                                | Q9Y2G1        | 1              |            |         |
| Myelin expression factor 2 OS=Homo sapiens GN=MYEF2 PE=1 SV=3                                 | Q9P2K5        | 1              | 1          |         |
| Multiple epidermal growth factor-like domains protein 8 OS=Homo sapiens GN=MEGF8 PE=1 SV=2    | Q7Z7M0        | 1              |            | 1       |
| Mucin-16 OS=Homo sapiens GN=MUC16 PE=1 SV=2                                                   | Q8WXI7        | 1              | 1          | 1       |
| Mothers against decapentaplegic homolog 2 OS=Homo sapiens GN=SMAD2 PE=1 SV=1                  | Q15796        | 1              |            |         |
| Monocarboxylate transporter 8 OS=Homo sapiens GN=SLC16A2 PE=1 SV=2                            | P36021        | 1              |            |         |
| LON peptidase N-terminal domain and RING finger protein 3 OS=Homo sapiens GN=LONRF3 PE=1 SV=1 | Q496Y0        | 1              |            | 3       |
| Mitogen-activated protein kinase kinase kinase kinase 4 isoform OS=Homo sapiens GN=MAP4K4     | Q5MD60        | 1              |            |         |
| Long-chain fatty acid transport protein 4 OS=Homo sapiens GN=SLC27A4 PE=1 SV=1                | Q6P1M0        | 1              |            |         |
| Mitogen-activated protein kinase 6 OS=Homo sapiens GN=MAPK6 PE=1 SV=1                         | Q16659        | 1              | 1          |         |
| Microtubule-associated serine/threonine-protein kinase 2 OS=Homo sapiens GN=MAST2 PE=1 SV=2   | Q6P0Q8        | 1              |            |         |
| Menin OS=Homo sapiens GN=MEN1 PE=1 SV=3                                                       | O00255        | 1              |            |         |
| MAP kinase-interacting serine/threonine-protein kinase 1 OS=Homo sapiens GN=MKNK1 PE=1 SV=1   | Q9BUB5        | 1              |            |         |

| Protein peptides                                                                                   | Accession No. | icPTPRD-D1521A | icPTPRD-WT | Control |
|----------------------------------------------------------------------------------------------------|---------------|----------------|------------|---------|
| Mannose-P-dolichol utilization defect 1 protein OS=Homo sapiens GN=MPDU1 PE=1 SV=2                 | O75352        | 1              |            |         |
| E3 ubiquitin-protein ligase CHFR OS=Homo sapiens GN=CHFR PE=1 SV=2                                 | Q96EP1        | 1              |            |         |
| Lysyl-tRNA synthetase OS=Homo sapiens GN=KARS PE=1 SV=3                                            | Q15046        | 1              |            | 1       |
| Lysophospholipid acyltransferase 7 OS=Homo sapiens GN=MBOAT7 PE=1 SV=2                             | Q96N66        | 1              |            |         |
| Lysine-specific demethylase 6B OS=Homo sapiens GN=KDM6B PE=1 SV=4                                  | O15054        | 1              | 1          |         |
| Low-density lipoprotein receptor-related protein 2 OS=Homo sapiens GN=LRP2 PE=1 SV=3               | P98164        | 1              |            |         |
| Inosine-5'-monophosphate dehydrogenase 1 OS=Homo sapiens GN=IMPDH1 PE=1 SV=2                       | P20839        | 1              |            |         |
| Mitogen-activated protein kinase-binding protein 1 OS=Homo sapiens GN=MAPKBP1 PE=2 SV=4            | O60336        | 1              | 3          | 1       |
| ATR-interacting protein OS=Homo sapiens GN=ATRIP PE=1 SV=1                                         | Q8WXE1        | 1              |            |         |
| Bromodomain containing protein 1 variant (Fragment) OS=Homo sapiens                                | Q59G93        | 1              |            |         |
| Bromodomain and WD repeat-containing protein 3 OS=Homo sapiens GN=BRWD3 PE=1 SV=2                  | Q6RI45        | 1              |            |         |
| Bridging integrator 3 OS=Homo sapiens GN=BIN3 PE=1 SV=1                                            | Q9NQY0        | 1              |            |         |
| Brefeldin A-inhibited guanine nucleotide-exchange protein 2 OS=Homo sapiens GN=ARFGEF2 PE=1 SV=3   | Q9Y6D5        | 1              |            | 1       |
| Bone morphogenetic protein 1 OS=Homo sapiens GN=BMP1 PE=1 SV=2                                     | P13497        | 1              |            |         |
| Bola-like protein 2 OS=Homo sapiens GN=BOLA2 PE=1 SV=1                                             | Q9H3K6        | 1              |            |         |
| Bleomycin hydrolase OS=Homo sapiens GN=BLMH PE=1 SV=1                                              | Q13867        | 1              |            |         |
| Biogenesis of lysosome-related organelles complex 1 subunit 2 OS=Homo sapiens GN=BLOC1S2 PE=1 SV=1 | Q6QNY1        | 1              | 2          | 1       |
| Bifunctional coenzyme A synthase OS=Homo sapiens GN=COASY PE=1 SV=4                                | Q13057        | 1              |            |         |
| Beclin 1-associated autophagy-related key regulator OS=Homo sapiens GN=ATG14 PE=1 SV=1             | Q6ZNE5        | 1              |            |         |

| Protein peptides                                                                                        | Accession No. | icPTPRD-D1521A | icPTPRD-WT | Control |
|---------------------------------------------------------------------------------------------------------|---------------|----------------|------------|---------|
| BCL-6 corepressor OS=Homo sapiens GN=BCOR PE=1 SV=1                                                     | Q6W2J9        | 1              |            |         |
| E3 ubiquitin-protein ligase HERC2 OS=Homo sapiens GN=HERC2 PE=1 SV=2                                    | O95714        | 1              |            |         |
| BAI1-associated protein 3 OS=Homo sapiens GN=BAIAP3 PE=1 SV=2                                           | O94812        | 1              |            |         |
| C21orf2 protein OS=Homo sapiens GN=C21orf2                                                              | Q8N5X6        | 1              |            |         |
| ATP-dependent DNA helicase Q4 OS=Homo sapiens GN=RECQL4 PE=1 SV=1                                       | O94761        | 1              |            |         |
| ATP-binding cassette sub-family F member 2 OS=Homo sapiens GN=ABCF2 PE=1 SV=2                           | Q9UG63        | 1              |            |         |
| ATP-binding cassette sub-family C member 9 OS=Homo sapiens GN=ABCC9 PE=1 SV=2                           | O60706        | 1              |            |         |
| ATP-binding cassette sub-family A member 13 OS=Homo sapiens GN=ABCA13 PE=2 SV=2                         | Q86UQ4        | 1              | 4          | 3       |
| ATP-binding cassette sub-family A member 12 OS=Homo sapiens GN=ABCA12 PE=1 SV=3                         | Q86UK0        | 1              |            |         |
| Ataxin-10 OS=Homo sapiens GN=ATXN10 PE=1 SV=1                                                           | Q9UBB4        | 1              | 1          | 5       |
| Armadillo repeat-containing protein 2 OS=Homo sapiens GN=ARMC2 PE=1 SV=4                                | Q8NEN0        | 1              |            |         |
| Annexin A5 OS=Homo sapiens GN=ANXA5 PE=1 SV=2                                                           | P08758        | 1              | 1          |         |
| Ankyrin-3 OS=Homo sapiens GN=ANK3 PE=1 SV=3                                                             | Q12955        | 1              | 1          | 2       |
| Angiopoietin-1 receptor OS=Homo sapiens GN=TEK PE=1 SV=2                                                | Q02763        | 1              |            |         |
| Amyloid beta A4 precursor protein-binding family B member 3 OS=Homo sapiens GN=APBB3 PE=1 SV=2          | O95704        | 1              |            |         |
| B-cell scaffold protein with ankyrin repeats OS=Homo sapiens GN=BANK1 PE=1 SV=3                         | Q8NDB2        | 1              |            | 1       |
| Caspase recruitment domain-containing protein 14 OS=Homo sapiens GN=CARD14 PE=1 SV=2                    | Q9BXL6        | 1              |            |         |
| cDNA FLJ56880 OS=Homo sapiens                                                                           | B7Z6C1        | 1              |            |         |
| cDNA FLJ56443, highly similar to Putative ATP-dependent RNA helicase DHX33 (EC 3.6.1.-) OS=Homo sapiens | B4DIS6        | 1              |            |         |

| Protein peptides                                                                                              | Accession No. | icPTPRD-D1521A | icPTPRD-WT | Control |
|---------------------------------------------------------------------------------------------------------------|---------------|----------------|------------|---------|
| cDNA FLJ54153, weakly similar to Homo sapiens Mof4 family associated protein 1 (MRFAP1), mRNA OS=Homo sapiens | B4DTJ7        | 1              |            | 2       |
| cDNA FLJ53883, highly similar to C-jun-amino-terminal kinase-interacting protein 1 OS=Homo sapiens            | B7Z1L7        | 1              |            |         |
| cDNA FLJ53559 OS=Homo sapiens                                                                                 | B4DKG6        | 1              |            |         |
| cDNA FLJ53535 OS=Homo sapiens                                                                                 | B4DK98        | 1              |            |         |
| cDNA FLJ40285 fis, clone TESTI2027820 OS=Homo sapiens                                                         | Q8N7W1        | 1              |            |         |
| CDKN2A-interacting protein OS=Homo sapiens GN=CDKN2AIP PE=1 SV=2                                              | Q9NXV6        | 1              |            |         |
| CD109 antigen OS=Homo sapiens GN=CD109 PE=1 SV=2                                                              | Q6YHK3        | 1              |            |         |
| C-C chemokine receptor type 5 OS=Homo sapiens GN=CCR5 PE=1 SV=1                                               | P51681        | 1              |            |         |
| Caspase-14 OS=Homo sapiens GN=CASP14 PE=1 SV=2                                                                | P31944        | 1              |            |         |
| Bromodomain testis-specific protein OS=Homo sapiens GN=BRDT PE=1 SV=4                                         | Q58F21        | 1              |            |         |
| Caspase recruitment domain-containing protein 6 OS=Homo sapiens GN=CARD6 PE=1 SV=2                            | Q9BX69        | 1              |            |         |
| C2 calcium-dependent domain-containing protein 4B OS=Homo sapiens GN=C2CD4B PE=2 SV=1                         | A6NLJ0        | 1              |            |         |
| Carnosine synthase 1 OS=Homo sapiens GN=CARNS1 PE=1 SV=3                                                      | A5YM72        | 1              |            |         |
| cAMP-specific 3',5'-cyclic phosphodiesterase 4D OS=Homo sapiens GN=PDE4D PE=1 SV=2                            | Q08499        | 1              |            |         |
| cAMP-specific 3',5'-cyclic phosphodiesterase 4A OS=Homo sapiens GN=PDE4A PE=1 SV=3                            | P27815        | 1              | 1          | 1       |
| cAMP-dependent protein kinase type I-alpha regulatory subunit OS=Homo sapiens GN=PRKAR1A PE=1 SV=1            | P10644        | 1              | 1          | 3       |
| cAMP-dependent protein kinase catalytic subunit beta OS=Homo sapiens GN=PRKACB PE=1 SV=2                      | P22694        | 1              |            |         |
| cAMP-dependent protein kinase catalytic subunit alpha OS=Homo sapiens GN=PRKACA PE=1 SV=2                     | P17612        | 1              | 1          | 1       |
| Calmodulin-like protein 5 OS=Homo sapiens GN=CALML5 PE=1 SV=2                                                 | Q9NZT1        | 1              |            |         |

| Protein peptides                                                                     | Accession No. | icPTPRD-D1521A | icPTPRD-WT | Control |
|--------------------------------------------------------------------------------------|---------------|----------------|------------|---------|
| Calcium homeostasis endoplasmic reticulum protein OS=Homo sapiens GN=CHERP PE=1 SV=3 | Q8IWX8        | 1              | 1          |         |
| Cadherin-like protein 26 OS=Homo sapiens GN=CDH26 PE=2 SV=3                          | Q8IXH8        | 1              |            |         |
| Cadherin-24 OS=Homo sapiens GN=CDH24 PE=1 SV=1                                       | Q86UP0        | 1              | 1          |         |
| Cadherin-11 OS=Homo sapiens GN=CDH11 PE=1 SV=2                                       | P55287        | 1              |            |         |
| Alstrom syndrome protein 1 OS=Homo sapiens GN=ALMS1 PE=1 SV=3                        | Q8TCU4        | 1              |            | 3       |
| Caspase-1 OS=Homo sapiens GN=CASP1 PE=1 SV=1                                         | P29466        | 1              | 1          |         |
| 28S ribosomal protein S33, mitochondrial OS=Homo sapiens GN=MRPS33 PE=1 SV=1         | Q9Y291        | 1              |            |         |
| Amphoterin-induced protein 1 OS=Homo sapiens GN=AMIGO1 PE=1 SV=1                     | Q86WK6        | 1              | 1          |         |
| 60S ribosomal protein L10-like OS=Homo sapiens GN=RPL10L PE=1 SV=3                   | Q96L21        | 1              |            |         |
| 60S ribosomal protein L10 OS=Homo sapiens GN=RPL10 PE=1 SV=4                         | P27635        | 1              |            | 1       |
| 60S acidic ribosomal protein P1 OS=Homo sapiens GN=RPLP1 PE=1 SV=1                   | P05386        | 1              | 1          |         |
| 5-hydroxytryptamine receptor 3A OS=Homo sapiens GN=HTR3A PE=1 SV=1                   | P46098        | 1              |            | 1       |
| 40S ribosomal protein SA OS=Homo sapiens GN=RPSA PE=1 SV=4                           | P08865        | 1              |            |         |
| 40S ribosomal protein S9 OS=Homo sapiens GN=RPS9 PE=1 SV=3                           | P46781        | 1              |            |         |
| 40S ribosomal protein S4, X isoform OS=Homo sapiens GN=RPS4X PE=1 SV=2               | P62701        | 1              | 2          |         |
| 40S ribosomal protein S27-like OS=Homo sapiens GN=RPS27L PE=1 SV=3                   | Q71UM5        | 1              | 1          |         |
| 40S ribosomal protein S2 OS=Homo sapiens GN=RPS2 PE=1 SV=2                           | P15880        | 1              | 1          |         |
| 40S ribosomal protein S17 OS=Homo sapiens GN=RPS17 PE=1 SV=2                         | P08708        | 1              | 2          |         |
| 60S ribosomal protein L14 OS=Homo sapiens GN=RPL14 PE=1 SV=4                         | P50914        | 1              |            |         |

| Protein peptides                                                                                                     | Accession No. | icPTPRD-D1521A | icPTPRD-WT | Control |
|----------------------------------------------------------------------------------------------------------------------|---------------|----------------|------------|---------|
| 40S ribosomal protein S10 OS=Homo sapiens GN=RPS10 PE=1 SV=1                                                         | P46783        | 1              | 1          |         |
| 60S ribosomal protein L18 OS=Homo sapiens GN=RPL18 PE=1 SV=2                                                         | Q07020        | 1              | 1          | 1       |
| 26S proteasome non-ATPase regulatory subunit 8 OS=Homo sapiens GN=PSMD8 PE=1 SV=2                                    | P48556        | 1              |            |         |
| 26S proteasome non-ATPase regulatory subunit 7 OS=Homo sapiens GN=PSMD7 PE=1 SV=2                                    | P51665        | 1              |            | 1       |
| 26S proteasome non-ATPase regulatory subunit 6 OS=Homo sapiens GN=PSMD6 PE=1 SV=1                                    | Q15008        | 1              | 1          |         |
| 26S proteasome non-ATPase regulatory subunit 10 OS=Homo sapiens GN=PSMD10 PE=1 SV=1                                  | O75832        | 1              |            |         |
| 26S protease regulatory subunit 8 OS=Homo sapiens GN=PSMC5 PE=1 SV=1                                                 | P62195        | 1              |            |         |
| 26S protease regulatory subunit 6B OS=Homo sapiens GN=PSMC4 PE=1 SV=2                                                | P43686        | 1              |            | 1       |
| 26S protease regulatory subunit 6A OS=Homo sapiens GN=PSMC3 PE=1 SV=3                                                | P17980        | 1              |            |         |
| 26S protease regulatory subunit 4 OS=Homo sapiens GN=PSMC1 PE=1 SV=1                                                 | P62191        | 1              |            | 1       |
| 14-3-3 protein theta OS=Homo sapiens GN=YWHAQ PE=1 SV=1                                                              | P27348        | 1              |            | 1       |
| 14-3-3 protein gamma OS=Homo sapiens GN=YWHAG PE=1 SV=2                                                              | P61981        | 1              |            | 3       |
| 14-3-3 protein eta OS=Homo sapiens GN=YWHAH PE=1 SV=4                                                                | Q04917        | 1              |            | 1       |
| 14-3-3 protein beta/alpha OS=Homo sapiens GN=YWHAB PE=1 SV=3                                                         | P31946        | 1              |            | 3       |
| 40S ribosomal protein S11 OS=Homo sapiens GN=RPS11 PE=1 SV=3                                                         | P62280        | 1              |            |         |
| 7SK snRNA methylphosphate capping enzyme OS=Homo sapiens GN=MEPCE PE=1 SV=1                                          | Q7L2J0        | 1              |            |         |
| cDNA FLJ58538, highly similar to Homo sapiens leucine zipper transcription regulator 2 (LZTR2), mRNA OS=Homo sapiens | B4DK76        | 1              |            |         |
| Alpha-centractin OS=Homo sapiens GN=ACTR1A PE=1 SV=1                                                                 | P61163        | 1              | 2          |         |
| Alkyldihydroxyacetonephosphate synthase, peroxisomal OS=Homo sapiens GN=AGPS PE=1 SV=1                               | O00116        | 1              |            |         |

| Protein peptides                                                                          | Accession No. | icPTPRD-D1521A | icPTPRD-WT | Control |
|-------------------------------------------------------------------------------------------|---------------|----------------|------------|---------|
| A-kinase anchor protein 9 OS=Homo sapiens GN=AKAP9 PE=1 SV=3                              | Q99996        | 1              |            |         |
| A-kinase anchor protein 4 OS=Homo sapiens GN=AKAP4 PE=1 SV=1                              | Q5JQC9        | 1              |            |         |
| ADP-ribosylation factor GTPase-activating protein 3 OS=Homo sapiens GN=ARFGAP3 PE=1 SV=1  | Q9NP61        | 1              |            | 2       |
| Adenylyl cyclase-associated protein OS=Homo sapiens                                       | B4DNA3        | 1              |            |         |
| Adenylyl cyclase-associated protein 1 OS=Homo sapiens GN=CAP1 PE=1 SV=5                   | Q01518        | 1              | 1          | 3       |
| Adenylate cyclase type 4 OS=Homo sapiens GN=ADCY4 PE=1 SV=1                               | Q8NFM4        | 1              | 1          |         |
| ADAMTS-like protein 3 OS=Homo sapiens GN=ADAMTSL3 PE=2 SV=4                               | P82987        | 1              |            |         |
| Activating signal cointegrator 1 complex subunit 2 OS=Homo sapiens GN=ASCC2 PE=1 SV=3     | Q9H118        | 1              |            | 4       |
| 60S ribosomal protein L13 OS=Homo sapiens GN=RPL13 PE=1 SV=4                              | P26373        | 1              |            | 1       |
| Abhydrolase domain-containing protein FAM108B1 OS=Homo sapiens GN=FAM108B1 PE=2 SV=1      | Q5VST6        | 1              | 1          | 1       |
| Amiloride-sensitive sodium channel subunit delta OS=Homo sapiens GN=SCNN1D PE=1 SV=2      | P51172        | 1              |            |         |
| 6-phosphofructo-2-kinase/fructose-2,6-biphosphatase 3 OS=Homo sapiens GN=PFKFB3 PE=1 SV=1 | Q16875        | 1              |            |         |
| 60S ribosomal protein L8 OS=Homo sapiens GN=RPL8 PE=1 SV=2                                | P62917        | 1              |            |         |
| 60S ribosomal protein L7a OS=Homo sapiens GN=RPL7A PE=1 SV=2                              | P62424        | 1              |            |         |
| 60S ribosomal protein L6 OS=Homo sapiens GN=RPL6 PE=1 SV=3                                | Q02878        | 1              |            |         |
| 60S ribosomal protein L37a OS=Homo sapiens GN=RPL37A PE=1 SV=2                            | P61513        | 1              | 1          |         |
| 60S ribosomal protein L35a OS=Homo sapiens GN=RPL35A PE=1 SV=2                            | P18077        | 1              |            |         |
| 60S ribosomal protein L35 OS=Homo sapiens GN=RPL35 PE=1 SV=2                              | P42766        | 1              |            |         |
| 60S ribosomal protein L34 OS=Homo sapiens GN=RPL34 PE=1 SV=3                              | P49207        | 1              |            |         |

| Protein peptides                                                                                       | Accession No. | icPTPRD-D1521A | icPTPRD-WT | Control |
|--------------------------------------------------------------------------------------------------------|---------------|----------------|------------|---------|
| 60S ribosomal protein L28 OS=Homo sapiens GN=RPL28 PE=1 SV=3                                           | P46779        | 1              |            |         |
| 60S ribosomal protein L26 OS=Homo sapiens GN=RPL26 PE=1 SV=1                                           | P61254        | 1              |            |         |
| 60S ribosomal protein L24 OS=Homo sapiens GN=RPL24 PE=1 SV=1                                           | P83731        | 1              |            |         |
| 60S ribosomal protein L18a OS=Homo sapiens GN=RPL18A PE=1 SV=2                                         | Q02543        | 1              |            |         |
| Actin-like protein 8 OS=Homo sapiens GN=ACTL8 PE=2 SV=1                                                | Q9H568        | 1              | 1          |         |
| Elongation factor 2 OS=Homo sapiens GN=EEF2 PE=1 SV=4                                                  | P13639        | 1              |            |         |
| DUX4 OS=Homo sapiens GN=DUX4                                                                           | C3U395        | 1              |            |         |
| Eukaryotic translation initiation factor 3 subunit M OS=Homo sapiens GN=EIF3M PE=1 SV=1                | Q7L2H7        | 1              | 2          | 1       |
| Eukaryotic translation initiation factor 3 subunit K OS=Homo sapiens GN=EIF3K PE=1 SV=1                | Q9UBQ5        | 1              |            | 1       |
| Eukaryotic translation initiation factor 3 subunit H OS=Homo sapiens GN=EIF3H PE=1 SV=1                | O15372        | 1              |            |         |
| Eukaryotic translation initiation factor 3 subunit A OS=Homo sapiens GN=EIF3A PE=1 SV=1                | Q14152        | 1              |            |         |
| Eukaryotic translation initiation factor 2-alpha kinase 4 OS=Homo sapiens GN=EIF2AK4 PE=1 SV=3         | Q9P2K8        | 1              |            |         |
| Eukaryotic translation initiation factor 2 subunit 3-like protein OS=Homo sapiens GN=EIF2S3L PE=1 SV=2 | Q2VIR3        | 1              | 1          |         |
| Estrogen-related receptor gamma OS=Homo sapiens GN=ESRRG PE=1 SV=1                                     | P62508        | 1              |            |         |
| Enhancer of filamentation 1 OS=Homo sapiens GN=NEDD9 PE=1 SV=1                                         | Q14511        | 1              |            |         |
| Endoplasmic reticulum aminopeptidase 2 OS=Homo sapiens GN=ERAP2 PE=1 SV=2                              | Q6P179        | 1              |            |         |
| Embryonic polyadenylate-binding protein 2 OS=Homo sapiens GN=PABPN1L PE=2 SV=1                         | A6NDY0        | 1              |            |         |
| Eukaryotic translation initiation factor 4E transporter OS=Homo sapiens GN=EIF4ENIF1 PE=1 SV=2         | Q9NRA8        | 1              |            | 2       |
| Elongator complex protein 2 OS=Homo sapiens GN=ELP2 PE=1 SV=2                                          | Q6IA86        | 1              |            |         |



| Protein peptides                                                                                                             | Accession No. | icPTPRD-D1521A | icPTPRD-WT | Control |
|------------------------------------------------------------------------------------------------------------------------------|---------------|----------------|------------|---------|
| Eukaryotic translation initiation factor 6 OS=Homo sapiens GN=EIF6 PE=1 SV=1                                                 | P56537        | 1              |            |         |
| Elongation factor 1-beta OS=Homo sapiens GN=EEF1B2 PE=1 SV=3                                                                 | P24534        | 1              | 1          | 1       |
| ELL-associated factor 2 OS=Homo sapiens GN=EAF2 PE=1 SV=1                                                                    | Q96CJ1        | 1              |            |         |
| Ectonucleotide pyrophosphatase/phosphodiesterase family member 1 OS=Homo sapiens GN=ENPP1 PE=1 SV=2                          | P22413        | 1              |            |         |
| E3 UFM1-protein ligase 1 OS=Homo sapiens GN=KIAA0776 PE=1 SV=2                                                               | O94874        | 1              |            |         |
| E3 ubiquitin-protein ligase SMURF2 OS=Homo sapiens GN=SMURF2 PE=1 SV=1                                                       | Q9HAU4        | 1              |            |         |
| E3 ubiquitin-protein ligase PDZRN3 OS=Homo sapiens GN=PDZRN3 PE=1 SV=2                                                       | Q9UPQ7        | 1              |            | 1       |
| E3 ubiquitin-protein ligase HUWE1 OS=Homo sapiens GN=HUWE1 PE=1 SV=3                                                         | Q7Z6Z7        | 1              |            |         |
| E3 ubiquitin-protein ligase DZIP3 OS=Homo sapiens GN=DZIP3 PE=1 SV=2                                                         | Q86Y13        | 1              |            |         |
| E1A-binding protein p400 OS=Homo sapiens GN=EP400 PE=1 SV=3                                                                  | Q96L91        | 1              |            | 1       |
| Dynein heavy chain 7, axonemal OS=Homo sapiens GN=DNAH7 PE=1 SV=2                                                            | Q8WXX0        | 1              | 3          | 3       |
| Dynein heavy chain 1, axonemal OS=Homo sapiens GN=DNAH1 PE=1 SV=3                                                            | Q9P2D7        | 1              |            |         |
| cDNA FLJ57338, moderately similar to Mus musculus UDP glucuronosyltransferase 2 family, polypeptide A2, mRNA OS=Homo sapiens | B4E2F4        | 1              |            |         |
| Elongator complex protein 3 OS=Homo sapiens GN=ELP3 PE=1 SV=2                                                                | Q9H9T3        | 1              |            | 1       |
| Gamma-2-syntrophin OS=Homo sapiens GN=SNTG2 PE=1 SV=2                                                                        | Q9NY99        | 1              |            |         |
| GUCA1B protein (Fragment) OS=Homo sapiens GN=GUCA1B                                                                          | A4FUA1        | 1              |            |         |
| Guanine nucleotide-binding protein G(olf) subunit alpha OS=Homo sapiens GN=GNAL PE=1 SV=1                                    | P38405        | 1              |            |         |
| Growth hormone-inducible transmembrane protein OS=Homo sapiens GN=GHITM PE=1 SV=2                                            | Q9H3K2        | 1              | 1          |         |
| Golgin subfamily A member 3 OS=Homo sapiens GN=GOLGA3 PE=1 SV=2                                                              | Q08378        | 1              |            |         |

| Protein peptides                                                                       | Accession No. | icPTPRD-D1521A | icPTPRD-WT | Control |
|----------------------------------------------------------------------------------------|---------------|----------------|------------|---------|
| GMP synthase [glutamine-hydrolyzing] OS=Homo sapiens GN=GMPS PE=1 SV=1                 | P49915        | 1              |            |         |
| Glycosyltransferase 54 domain-containing protein OS=Homo sapiens PE=2 SV=3             | A6NG13        | 1              | 1          |         |
| Glycine N-acyltransferase OS=Homo sapiens GN=GLYAT PE=1 SV=3                           | Q6IB77        | 1              | 1          | 2       |
| Glyceraldehyde-3-phosphate dehydrogenase OS=Homo sapiens GN=GAPDH PE=1 SV=3            | P04406        | 1              |            |         |
| Glutamyl aminopeptidase OS=Homo sapiens GN=ENPEP PE=1 SV=3                             | Q07075        | 1              |            | 1       |
| Glutamyl-tRNA synthetase OS=Homo sapiens GN=QARS PE=1 SV=1                             | P47897        | 1              | 1          |         |
| Glutamate dehydrogenase 2, mitochondrial OS=Homo sapiens GN=GLUD2 PE=1 SV=2            | P49448        | 1              |            |         |
| Eukaryotic translation initiation factor 4 gamma 1 OS=Homo sapiens GN=EIF4G1 PE=1 SV=4 | Q04637        | 1              |            |         |
| Gem-associated protein 8 OS=Homo sapiens GN=GEMIN8 PE=1 SV=1                           | Q9NWZ8        | 1              | 2          |         |
| Dual specificity protein phosphatase 7 OS=Homo sapiens GN=DUSP7 PE=1 SV=3              | Q16829        | 1              |            |         |
| FYVE, RhoGEF and PH domain-containing protein 4 OS=Homo sapiens GN=FGD4 PE=1 SV=2      | Q96M96        | 1              |            |         |
| Frizzled-1 OS=Homo sapiens GN=FZD1 PE=1 SV=2                                           | Q9UP38        | 1              |            |         |
| Filamin-B OS=Homo sapiens GN=FLNB PE=1 SV=2                                            | O75369        | 1              |            |         |
| Ficolin-2 OS=Homo sapiens GN=FCN2 PE=1 SV=2                                            | Q15485        | 1              |            |         |
| Fibrous sheath-interacting protein 2 OS=Homo sapiens GN=FSIP2 PE=1 SV=4                | Q5CZC0        | 1              |            |         |
| F-box/WD repeat-containing protein 9 OS=Homo sapiens GN=FBXW9 PE=1 SV=2                | Q5XUX1        | 1              |            |         |
| Fatty acid synthase OS=Homo sapiens GN=FASN PE=1 SV=3                                  | P49327        | 1              | 2          | 4       |
| F-actin-capping protein subunit beta OS=Homo sapiens GN=CAPZB PE=1 SV=4                | P47756        | 1              |            | 1       |
| Exportin-T OS=Homo sapiens GN=XPOT PE=1 SV=2                                           | O43592        | 1              |            |         |

| Protein peptides                                                               | Accession No. | icPTPRD-D1521A | icPTPRD-WT | Control |
|--------------------------------------------------------------------------------|---------------|----------------|------------|---------|
| Exportin-1 OS=Homo sapiens GN=XPO1 PE=1 SV=1                                   | O14980        | 1              | 2          | 2       |
| Exosome complex exonuclease RRP45 OS=Homo sapiens GN=EXOSC9 PE=1 SV=3          | Q06265        | 1              |            |         |
| Exosome complex exonuclease RRP4 OS=Homo sapiens GN=EXOSC2 PE=1 SV=2           | Q13868        | 1              |            |         |
| Girdin OS=Homo sapiens GN=CCDC88A PE=1 SV=2                                    | Q3V6T2        | 1              |            | 7       |
| Centrosomal protein of 152 kDa OS=Homo sapiens GN=CEP152 PE=1 SV=3             | O94986        | 1              |            |         |
| Dynactin subunit 2 OS=Homo sapiens GN=DCTN2 PE=1 SV=4                          | Q13561        | 1              |            | 2       |
| Coiled-coil domain-containing protein 18 OS=Homo sapiens GN=CCDC18 PE=1 SV=1   | Q5T9S5        | 1              |            |         |
| Coiled-coil domain-containing protein 150 OS=Homo sapiens GN=CCDC150 PE=2 SV=2 | Q8NCX0        | 1              |            |         |
| Codanin-1 OS=Homo sapiens GN=CDAN1 PE=1 SV=4                                   | Q8IWY9        | 1              | 2          |         |
| Coatomer subunit beta' OS=Homo sapiens GN=COPB2 PE=1 SV=2                      | P35606        | 1              |            | 3       |
| Coagulation factor VIII OS=Homo sapiens GN=F8 PE=1 SV=1                        | P00451        | 1              | 1          | 1       |
| Chromodomain-helicase-DNA-binding protein 8 OS=Homo sapiens GN=CHD8 PE=1 SV=4  | Q9HCK8        | 1              |            |         |
| Chromodomain-helicase-DNA-binding protein 6 OS=Homo sapiens GN=CHD6 PE=1 SV=4  | Q8TD26        | 1              |            |         |
| Chromodomain-helicase-DNA-binding protein 2 OS=Homo sapiens GN=CHD2 PE=1 SV=2  | O14647        | 1              |            |         |
| Chromobox protein homolog 6 OS=Homo sapiens GN=CBX6 PE=1 SV=1                  | O95503        | 1              |            |         |
| Charged multivesicular body protein 2b OS=Homo sapiens GN=CHMP2B PE=1 SV=1     | Q9UQN3        | 1              | 1          |         |
| Collagen alpha-3(IV) chain OS=Homo sapiens GN=COL4A3 PE=1 SV=3                 | Q01955        | 1              |            |         |
| Centrosomal protein of 70 kDa OS=Homo sapiens GN=CEP70 PE=1 SV=2               | Q8NHQ1        | 1              |            | 7       |
| Complement component C9 OS=Homo sapiens GN=C9 PE=1 SV=2                        | P02748        | 1              |            |         |

| Protein peptides                                                                                                   | Accession No. | icPTPRD-D1521A | icPTPRD-WT | Control |
|--------------------------------------------------------------------------------------------------------------------|---------------|----------------|------------|---------|
| Centromere-associated protein E OS=Homo sapiens GN=CENPE PE=1 SV=2                                                 | Q02224        | 1              |            | 1       |
| Centlein OS=Homo sapiens GN=CNTRLN PE=2 SV=4                                                                       | Q9NXG0        | 1              |            | 1       |
| Cell division protein kinase 9 OS=Homo sapiens GN=CDK9 PE=1 SV=3                                                   | P50750        | 1              |            |         |
| Cell division cycle 5-like protein OS=Homo sapiens GN=CDC5L PE=1 SV=2                                              | Q99459        | 1              | 1          |         |
| Cell differentiation protein RCD1 homolog OS=Homo sapiens GN=RQCD1 PE=1 SV=1                                       | Q92600        | 1              |            |         |
| Cell adhesion molecule-related/down-regulated by oncogenes OS=Homo sapiens GN=CDON PE=1 SV=2                       | Q4KMG0        | 1              |            |         |
| CEBPD protein OS=Homo sapiens GN=CEBPD                                                                             | Q504X4        | 1              |            |         |
| cDNA FLJ77204 OS=Homo sapiens                                                                                      | A8K9T0        | 1              |            |         |
| cDNA FLJ60502, highly similar to homeodomain transcription factor 1 OS=Homo sapiens                                | B4DGS8        | 1              |            |         |
| cDNA FLJ60374 OS=Homo sapiens                                                                                      | B4DYY8        | 1              | 1          |         |
| cDNA FLJ58690, highly similar to Solute carrier family 2, facilitated glucosetransporter member 11 OS=Homo sapiens | B7Z6F0        | 1              |            |         |
| HAUS augmin-like complex subunit 7 OS=Homo sapiens GN=HAUS7 PE=1 SV=3                                              | Q99871        | 1              |            |         |
| Centrosomal protein of 78 kDa OS=Homo sapiens GN=CEP78 PE=1 SV=1                                                   | Q5JTW2        | 1              |            |         |
| Cytotoxic and regulatory T-cell molecule OS=Homo sapiens GN=CRTAM PE=1 SV=2                                        | O95727        | 1              |            |         |
| Drebrin-like protein OS=Homo sapiens GN=DBNL PE=1 SV=1                                                             | Q9UJU6        | 1              |            |         |
| DnaJ homolog subfamily C member 25 OS=Homo sapiens GN=DNAJC25 PE=2 SV=1                                            | Q9H1X3        | 1              |            |         |
| DnaJ homolog subfamily A member 1 OS=Homo sapiens GN=DNAJA1 PE=1 SV=2                                              | P31689        | 1              |            |         |
| DNA-directed RNA polymerases I and III subunit RPAC1 OS=Homo sapiens GN=POLR1C PE=1 SV=1                           | O15160        | 1              |            |         |
| DNA-directed RNA polymerase II subunit RPB7 OS=Homo sapiens GN=POLR2G PE=1 SV=1                                    | P62487        | 1              |            |         |

| Protein peptides                                                                     | Accession No. | icPTPRD-D1521A | icPTPRD-WT | Control |
|--------------------------------------------------------------------------------------|---------------|----------------|------------|---------|
| DNA-binding protein SATB2 OS=Homo sapiens GN=SATB2 PE=1 SV=2                         | Q9UPW6        | 1              |            |         |
| DNA-binding protein A OS=Homo sapiens GN=CSDA PE=1 SV=4                              | P16989        | 1              | 1          | 1       |
| DNA replication licensing factor MCM4 OS=Homo sapiens GN=MCM4 PE=1 SV=5              | P33991        | 1              |            |         |
| DNA polymerase epsilon catalytic subunit A OS=Homo sapiens GN=POLE PE=1 SV=5         | Q07864        | 1              |            |         |
| Developmentally-regulated GTP-binding protein 1 OS=Homo sapiens GN=DRG1 PE=1 SV=1    | Q9Y295        | 1              |            | 1       |
| Desmoglein-4 OS=Homo sapiens GN=DSG4 PE=1 SV=1                                       | Q86SJ6        | 1              |            |         |
| Collagen alpha-2(IV) chain OS=Homo sapiens GN=COL4A2 PE=1 SV=4                       | P08572        | 1              |            |         |
| Deoxyhypusine synthase OS=Homo sapiens GN=DHPS PE=1 SV=1                             | P49366        | 1              |            |         |
| cDNA FLJ58051, highly similar to Tetraspanin-7 OS=Homo sapiens                       | B4DDG0        | 1              | 1          |         |
| Cytosolic 5'-nucleotidase 3 OS=Homo sapiens GN=NT5C3 PE=1 SV=3                       | Q9H0P0        | 1              | 1          |         |
| Cytoplasmic FMR1-interacting protein 1 OS=Homo sapiens GN=CYFIP1 PE=1 SV=1           | Q7L576        | 1              |            |         |
| Cytochrome b-c1 complex subunit 2, mitochondrial OS=Homo sapiens GN=UQCRC2 PE=1 SV=3 | P22695        | 1              | 1          |         |
| Cyclin-dependent kinase 5 activator 1 OS=Homo sapiens GN=CDK5R1 PE=1 SV=1            | Q15078        | 1              |            |         |
| CUGBP Elav-like family member 3 OS=Homo sapiens GN=CELF3 PE=1 SV=1                   | Q5SZQ8        | 1              |            |         |
| CST complex subunit STN1 OS=Homo sapiens GN=OBFC1 PE=1 SV=2                          | Q9H668        | 1              |            |         |
| Copper homeostasis protein cutC homolog OS=Homo sapiens GN=CUTC PE=1 SV=1            | Q9NTM9        | 1              |            |         |
| Cooperator of PRMT5 OS=Homo sapiens GN=COPR5 PE=1 SV=3                               | Q9NQ92        | 1              |            |         |
| Contactin-6 OS=Homo sapiens GN=CNTN6 PE=1 SV=1                                       | Q9UQ52        | 1              |            |         |
| Conserved oligomeric Golgi complex subunit 3 OS=Homo sapiens GN=COG3 PE=1 SV=3       | Q96JB2        | 1              |            |         |

| Protein peptides                                                                                                       | Accession No. | icPTPRD-D1521A | icPTPRD-WT | Control |
|------------------------------------------------------------------------------------------------------------------------|---------------|----------------|------------|---------|
| Conserved oligomeric Golgi complex subunit 1 OS=Homo sapiens GN=COG1 PE=1 SV=1                                         | Q8WTW3        | 1              |            |         |
| Condensin complex subunit 3 OS=Homo sapiens GN=NCAPG PE=1 SV=1                                                         | Q9BPX3        | 1              |            |         |
| Desmoglein-2 OS=Homo sapiens GN=DSG2 PE=1 SV=2                                                                         | Q14126        | 1              |            | 1       |
| Serine/threonine-protein phosphatase 6 regulatory subunit 1 OS=Homo sapiens GN=PPP6R1 PE=1 SV=5                        | Q9UPN7        | 1              |            |         |
| Protocadherin gamma-A10 OS=Homo sapiens GN=PCDHGA10 PE=2 SV=1                                                          | Q9Y5H3        | 1              |            |         |
| Putative ATP-dependent RNA helicase DDX11-like protein 8 OS=Homo sapiens GN=DDX11L8 PE=1 SV=1                          | A8MPP1        | 1              | 2          | 1       |
| Serine/threonine-protein kinase PDIK1L OS=Homo sapiens GN=PDIK1L PE=2 SV=1                                             | Q8N165        | 1              |            |         |
| Serine/threonine-protein phosphatase 2A 65 kDa regulatory subunit A alpha isoform OS=Homo sapiens GN=PPP2R1A PE=1 SV=4 | P30153        | 1              |            | 1       |
| THAP domain-containing protein 9 OS=Homo sapiens GN=THAP9 PE=2 SV=2                                                    | Q9H5L6        | 1              | 4          | 2       |
| Putative 60S ribosomal protein L13a-like MGC87657 OS=Homo sapiens PE=5 SV=1                                            | Q6NVV1        | 1              |            | 1       |
| Serine/threonine-protein kinase Nek3 OS=Homo sapiens GN=NEK3 PE=1 SV=2                                                 | P51956        | 1              |            |         |
| Pumilio domain-containing protein C14orf21 OS=Homo sapiens GN=C14orf21 PE=1 SV=1                                       | Q86U38        | 1              | 6          | 2       |
| Serine/threonine-protein kinase Nek11 OS=Homo sapiens GN=NEK11 PE=1 SV=2                                               | Q8NG66        | 1              |            |         |
| Serpin B10 OS=Homo sapiens GN=SERPINB10 PE=1 SV=1                                                                      | P48595        | 1              |            |         |
| Uncharacterized protein C10orf68 OS=Homo sapiens GN=C10orf68 PE=2 SV=1                                                 | Q9H943        | 1              |            |         |
| Proto-oncogene vav OS=Homo sapiens GN=VAV1 PE=1 SV=4                                                                   | P15498        | 1              |            |         |
| Proto-oncogene serine/threonine-protein kinase mos OS=Homo sapiens GN=MOS PE=1 SV=1                                    | P00540        | 1              |            |         |
| Protocadherin-17 OS=Homo sapiens GN=PCDH17 PE=2 SV=2                                                                   | O14917        | 1              | 3          | 1       |
| Putative uncharacterized protein (Fragment) OS=Homo sapiens                                                            | O95420        | 1              |            |         |

| Protein peptides                                                                             | Accession No. | icPTPRD-D1521A | icPTPRD-WT | Control |
|----------------------------------------------------------------------------------------------|---------------|----------------|------------|---------|
| Putative 40S ribosomal protein S10-like OS=Homo sapiens GN=RPS10P5 PE=5 SV=1                 | Q9NQ39        | 1              | 1          |         |
| Serine/threonine-protein kinase 16 OS=Homo sapiens GN=STK16 PE=1 SV=4                        | O75716        | 1              |            |         |
| Protein ITFG3 OS=Homo sapiens GN=ITFG3 PE=1 SV=1                                             | Q9H0X4        | 1              |            | 2       |
| U7 snRNA-associated Sm-like protein LSm11 OS=Homo sapiens GN=LSM11 PE=1 SV=2                 | P83369        | 1              |            |         |
| Titin OS=Homo sapiens GN=TTN PE=1 SV=2                                                       | Q8WZ42        | 1              | 1          | 2       |
| Putative rhophilin-2-like protein OS=Homo sapiens PE=5 SV=2                                  | A8MT19        | 1              |            |         |
| Ubiquitin carboxyl-terminal hydrolase 11 OS=Homo sapiens GN=USP11 PE=1 SV=3                  | P51784        | 1              |            |         |
| Serine/arginine-rich splicing factor 7 OS=Homo sapiens GN=SRSF7 PE=1 SV=1                    | Q16629        | 1              |            |         |
| Serine/threonine-protein kinase Nek4 OS=Homo sapiens GN=NEK4 PE=1 SV=2                       | P51957        | 1              |            |         |
| Thyroid receptor-interacting protein 11 OS=Homo sapiens GN=TRIP11 PE=1 SV=3                  | Q15643        | 1              |            |         |
| Tetratricopeptide repeat protein 34 OS=Homo sapiens GN=TTC34 PE=2 SV=2                       | A8MYJ7        | 1              |            | 2       |
| Ubiquitin carboxyl-terminal hydrolase OS=Homo sapiens                                        | B4DGT3        | 1              |            |         |
| Putative male-specific lethal-3 protein-like 2 OS=Homo sapiens GN=MSL3L2 PE=5 SV=1           | P0C860        | 1              |            |         |
| Threonyl-tRNA synthetase, cytoplasmic OS=Homo sapiens GN=TARS PE=1 SV=3                      | P26639        | 1              |            |         |
| Putative gonadotropin-releasing hormone II receptor OS=Homo sapiens GN=GNRHR2 PE=5 SV=3      | Q96P88        | 1              |            | 1       |
| UDP-N-acetylglucosamine transferase subunit ALG13 homolog OS=Homo sapiens GN=ALG13 PE=1 SV=2 | Q9NP73        | 1              | 4          | 1       |
| THO complex subunit 4 OS=Homo sapiens GN=THOC4 PE=1 SV=3                                     | Q86V81        | 1              |            |         |
| Serine/threonine-protein kinase 10 OS=Homo sapiens GN=STK10 PE=1 SV=1                        | O94804        | 1              |            |         |
| Protein naked cuticle homolog 2 OS=Homo sapiens GN=NKD2 PE=1 SV=1                            | Q969F2        | 1              |            |         |

| Protein peptides                                                                                 | Accession No. | icPTPRD-D1521A | icPTPRD-WT | Control |
|--------------------------------------------------------------------------------------------------|---------------|----------------|------------|---------|
| TFIIH basal transcription factor complex helicase XPD subunit OS=Homo sapiens GN=ERCC2 PE=1 SV=1 | P18074        | 1              |            |         |
| TEL2-interacting protein 1 homolog OS=Homo sapiens GN=TTI1 PE=1 SV=3                             | O43156        | 1              | 2          | 1       |
| Protein phosphatase 1A OS=Homo sapiens GN=PPM1A PE=1 SV=1                                        | P35813        | 1              |            | 2       |
| Plakophilin-2 OS=Homo sapiens GN=PKP2 PE=1 SV=2                                                  | Q99959        | 1              |            |         |
| Uncharacterized protein C20orf117 OS=Homo sapiens GN=C20orf117 PE=1 SV=2                         | O94964        | 1              |            |         |
| Mitogen-activated protein kinase 12 OS=Homo sapiens GN=MAPK12 PE=1 SV=3                          | P53778        | 1              |            |         |
| Single-chain Fv (Fragment) OS=Homo sapiens GN=scFv                                               | Q65ZC8        | 1              |            |         |
| Uncharacterized protein C20orf152 OS=Homo sapiens GN=C20orf152 PE=2 SV=2                         | Q96M20        | 1              |            |         |
| Protein RMD5 homolog A OS=Homo sapiens GN=RMND5A PE=1 SV=1                                       | Q9H871        | 1              |            |         |
| Uncharacterized protein C3orf20 OS=Homo sapiens GN=C3orf20 PE=1 SV=2                             | Q8ND61        | 1              |            |         |
| Protein LAS1 homolog OS=Homo sapiens GN=LAS1L PE=1 SV=2                                          | Q9Y4W2        | 1              |            |         |
| Uncharacterized protein C3orf26 OS=Homo sapiens GN=C3orf26 PE=1 SV=2                             | Q9BQ75        | 1              |            |         |
| Uncharacterized protein C6orf150 OS=Homo sapiens GN=C6orf150 PE=1 SV=2                           | Q8N884        | 1              |            |         |
| Sodium channel protein type 10 subunit alpha OS=Homo sapiens GN=SCN10A PE=1 SV=2                 | Q9Y5Y9        | 1              |            |         |
| Tektin-4 OS=Homo sapiens GN=TEKT4 PE=2 SV=1                                                      | Q8WW24        | 1              | 1          |         |
| SLIT-ROBO Rho GTPase-activating protein 1 OS=Homo sapiens GN=SRGAP1 PE=1 SV=1                    | Q7Z6B7        | 1              |            |         |
| Translationally-controlled tumor protein OS=Homo sapiens GN=TPT1 PE=1 SV=1                       | P13693        | 1              |            |         |
| Tetratricopeptide repeat protein 28 OS=Homo sapiens GN=TTC28 PE=1 SV=4                           | Q96AY4        | 1              |            | 2       |
| Tetratricopeptide repeat protein 17 OS=Homo sapiens GN=TTC17 PE=1 SV=1                           | Q96AE7        | 1              |            |         |



| Protein peptides                                                                                      | Accession No. | icPTPRD-D1521A | icPTPRD-WT | Control |
|-------------------------------------------------------------------------------------------------------|---------------|----------------|------------|---------|
| SH3 domain-containing kinase-binding protein 1 OS=Homo sapiens GN=SH3KBP1 PE=1 SV=2                   | Q96B97        | 1              |            |         |
| Protein unc-79 homolog OS=Homo sapiens GN=KIAA1409 PE=2 SV=3                                          | Q9P2D8        | 1              |            |         |
| Short stature homeobox protein 2 OS=Homo sapiens GN=SHOX2 PE=2 SV=4                                   | O60902        | 1              | 1          |         |
| Uncharacterized protein C16orf73 OS=Homo sapiens GN=C16orf73 PE=2 SV=3                                | Q8N635        | 1              | 1          |         |
| Protein phosphatase 1D OS=Homo sapiens GN=PPM1D PE=1 SV=1                                             | O15297        | 1              |            |         |
| Uncharacterized protein C17orf66 OS=Homo sapiens GN=C17orf66 PE=2 SV=2                                | A2RTY3        | 1              |            |         |
| U6 snRNA-associated Sm-like protein LSm4 OS=Homo sapiens GN=LSM4 PE=1 SV=1                            | Q9Y4Z0        | 1              | 1          |         |
| Signal recognition particle 14 kDa protein OS=Homo sapiens GN=SRP14 PE=1 SV=2                         | P37108        | 1              |            | 1       |
| Ras and Rab interactor 3 OS=Homo sapiens GN=RIN3 PE=1 SV=4                                            | Q8TB24        | 1              |            |         |
| Protein spire homolog 2 OS=Homo sapiens GN=SPIRE2 PE=1 SV=3                                           | Q8WWL2        | 1              |            |         |
| Protein Shroom3 OS=Homo sapiens GN=SHROOM3 PE=1 SV=2                                                  | Q8TF72        | 1              | 4          |         |
| Protein S100-A9 OS=Homo sapiens GN=S100A9 PE=1 SV=1                                                   | P06702        | 1              |            | 1       |
| Protein rogdi homolog OS=Homo sapiens GN=ROGDI PE=2 SV=1                                              | Q9GZN7        | 1              |            |         |
| Protein THEMIS OS=Homo sapiens GN=THEMIS PE=1 SV=3                                                    | Q8N1K5        | 1              |            | 1       |
| Rho guanine nucleotide exchange factor 15 OS=Homo sapiens GN=ARHGEF15 PE=1 SV=4                       | O94989        | 1              |            |         |
| Rheumatoid factor RF-IP16 (Fragment) OS=Homo sapiens                                                  | A2J1P0        | 1              |            |         |
| Transforming acidic coiled-coil-containing protein 2 OS=Homo sapiens GN=TACC2 PE=1 SV=3               | O95359        | 1              |            |         |
| Ribosomal protein S6 kinase delta-1 OS=Homo sapiens GN=RPS6KC1 PE=1 SV=2                              | Q96S38        | 1              |            |         |
| tRNA (adenine-N(1)-)-methyltransferase catalytic subunit TRMT61A OS=Homo sapiens GN=TRMT61A PE=1 SV=1 | Q96FX7        | 1              | 1          |         |

| Protein peptides                                                                             | Accession No. | icPTPRD-D1521A | icPTPRD-WT | Control |
|----------------------------------------------------------------------------------------------|---------------|----------------|------------|---------|
| tRNA pseudouridine synthase A, mitochondrial OS=Homo sapiens GN=PUS1 PE=1 SV=3               | Q9Y606        | 1              |            |         |
| Transcriptional adapter 2-beta OS=Homo sapiens GN=TADA2B PE=1 SV=2                           | Q86TJ2        | 1              |            |         |
| Ribosomal RNA-processing protein 7 homolog A OS=Homo sapiens GN=RRP7A PE=1 SV=2              | Q9Y3A4        | 1              |            | 1       |
| Tubulin alpha chain-like 3 OS=Homo sapiens GN=TUBAL3 PE=1 SV=2                               | A6NHL2        | 1              | 1          | 1       |
| Ribosome biogenesis protein BMS1 homolog OS=Homo sapiens GN=BMS1 PE=1 SV=1                   | Q14692        | 1              |            |         |
| Transcription termination factor, mitochondrial OS=Homo sapiens GN=MTERF PE=1 SV=1           | Q99551        | 1              | 1          | 2       |
| Rho GTPase-activating protein SYDE2 OS=Homo sapiens GN=SYDE2 PE=1 SV=1                       | Q5VT97        | 1              |            |         |
| Rho GTPase-activating protein 26 OS=Homo sapiens GN=ARHGAP26 PE=1 SV=1                       | Q9UNA1        | 1              | 1          |         |
| Rho GTPase-activating protein 19 OS=Homo sapiens GN=ARHGAP19 PE=1 SV=1                       | Q14CB8        | 1              |            |         |
| Transcription initiation factor IIE subunit beta OS=Homo sapiens GN=GTF2E2 PE=1 SV=1         | P29084        | 1              |            |         |
| U7 snRNA-associated Sm-like protein LSM10 OS=Homo sapiens GN=LSM10 PE=1 SV=1                 | Q969L4        | 1              |            |         |
| Transcriptional activator protein Pur-alpha OS=Homo sapiens GN=PURA PE=1 SV=2                | Q00577        | 1              |            |         |
| S-adenosylmethionine synthase isoform type-1 OS=Homo sapiens GN=MAT1A PE=1 SV=2              | Q00266        | 1              |            |         |
| RRP15-like protein OS=Homo sapiens GN=RRP15 PE=1 SV=2                                        | Q9Y3B9        | 1              |            |         |
| rRNA 2'-O-methyltransferase fibrillar OS=Homo sapiens GN=FBL PE=1 SV=2                       | P22087        | 1              |            |         |
| RUN domain-containing protein 3B OS=Homo sapiens GN=RUNDC3B PE=1 SV=1                        | Q96NL0        | 1              |            |         |
| RuvB-like 1 OS=Homo sapiens GN=RUVBL1 PE=1 SV=1                                              | Q9Y265        | 1              | 1          | 1       |
| Transmembrane and coiled-coil domain-containing protein 2 OS=Homo sapiens GN=TMCO2 PE=2 SV=1 | Q7Z6W1        | 1              |            |         |
| RuvB-like 2 OS=Homo sapiens GN=RUVBL2 PE=1 SV=3                                              | Q9Y230        | 1              | 1          | 4       |

| Protein peptides                                                                        | Accession No. | icPTPRD-D1521A | icPTPRD-WT | Control |
|-----------------------------------------------------------------------------------------|---------------|----------------|------------|---------|
| Tripartite motif-containing protein 49-like protein MGC161748 OS=Homo sapiens PE=2 SV=1 | P0CI26        | 1              |            |         |
| Transmembrane protease serine 7 OS=Homo sapiens GN=TMPRSS7 PE=2 SV=2                    | Q7RTY8        | 1              |            |         |
| Retroviral-like aspartic protease 1 OS=Homo sapiens GN=ASPRV1 PE=1 SV=1                 | Q53RT3        | 1              |            |         |
| Transmembrane protein 14B OS=Homo sapiens GN=TMEM14B PE=2 SV=1                          | Q9NUH8        | 1              |            |         |
| Sal-like protein 3 OS=Homo sapiens GN=SALL3 PE=2 SV=2                                   | Q9BXA9        | 1              | 1          |         |
| SCAN domain-containing protein 3 OS=Homo sapiens GN=SCAND3 PE=2 SV=1                    | Q6R2W3        | 1              |            |         |
| RING finger and SPRY domain-containing protein 1 OS=Homo sapiens GN=RSPRY1 PE=2 SV=1    | Q96DX4        | 1              |            |         |
| RIMS-binding protein 3A OS=Homo sapiens GN=RIMBP3 PE=1 SV=3                             | Q9UFD9        | 1              |            |         |
| Trinucleotide repeat-containing gene 6A protein OS=Homo sapiens GN=TNRC6A PE=1 SV=2     | Q8NDV7        | 1              | 1          |         |
| RNA binding motif protein, X-linked-like 1 (Fragment) OS=Homo sapiens GN=RBMXL1         | Q5T9T9        | 1              |            |         |
| Putative uncharacterized protein ENSP00000383309 OS=Homo sapiens PE=5 SV=3              | A8MUU9        | 1              |            | 1       |
| Rho GDP-dissociation inhibitor 1 OS=Homo sapiens GN=ARHGDI1 PE=1 SV=3                   | P52565        | 1              |            |         |
| RalBP1-associated Eps domain-containing protein 1 OS=Homo sapiens GN=REPS1 PE=1 SV=3    | Q96D71        | 1              |            |         |
| Rab9 effector protein with kelch motifs OS=Homo sapiens GN=RABEPK PE=1 SV=1             | Q7Z6M1        | 1              | 2          |         |
| Rab GDP dissociation inhibitor beta OS=Homo sapiens GN=GDI2 PE=1 SV=2                   | P50395        | 1              |            |         |
| Pyroline-5-carboxylate reductase 3 OS=Homo sapiens GN=PYCRL PE=1 SV=2                   | Q53H96        | 1              |            |         |
| Tyrosine-protein phosphatase non-receptor type 21 OS=Homo sapiens GN=PTPN21 PE=1 SV=2   | Q16825        | 1              |            |         |
| Serine hydroxymethyltransferase OS=Homo sapiens                                         | B4DWA7        | 1              |            |         |
| TPR repeat-containing protein C10orf93 OS=Homo sapiens GN=C10orf93 PE=2 SV=2            | Q5SR76        | 1              |            |         |

| Protein peptides                                                                      | Accession No. | icPTPRD-D1521A | icPTPRD-WT | Control |
|---------------------------------------------------------------------------------------|---------------|----------------|------------|---------|
| Transcription factor BTF3 OS=Homo sapiens GN=BTF3 PE=1 SV=1                           | P20290        | 1              |            |         |
| U1 small nuclear ribonucleoprotein 70 kDa OS=Homo sapiens GN=SNRNP70 PE=1 SV=2        | P08621        | 1              |            |         |
| Putative uncharacterized protein DKFZp781D2453 OS=Homo sapiens GN=DKFZp781D2453       | Q68DE7        | 1              |            |         |
| U2 small nuclear ribonucleoprotein A' OS=Homo sapiens GN=SNRPA1 PE=1 SV=2             | P09661        | 1              | 1          |         |
| Putative uncharacterized protein C13orf35 OS=Homo sapiens GN=C13orf35 PE=2 SV=1       | Q6ZP68        | 1              |            |         |
| U2 small nuclear ribonucleoprotein B'' OS=Homo sapiens GN=SNRPB2 PE=1 SV=1            | P08579        | 1              |            |         |
| Putative uncharacterized protein C12orf63 OS=Homo sapiens GN=C12orf63 PE=2 SV=2       | Q6ZTY8        | 1              |            |         |
| Tyrosine-protein phosphatase non-receptor type 23 OS=Homo sapiens GN=PTPN23 PE=1 SV=1 | Q9H3S7        | 1              |            |         |
| Ras-responsive element-binding protein 1 OS=Homo sapiens GN=RREB1 PE=1 SV=3           | Q92766        | 1              |            |         |
| Retinol dehydrogenase 10 OS=Homo sapiens GN=RDH10 PE=1 SV=1                           | Q8IZV5        | 1              |            |         |
| Retinoid-inducible serine carboxypeptidase OS=Homo sapiens GN=SCPEP1 PE=1 SV=1        | Q9HB40        | 1              |            |         |
| Sentrin-specific protease 7 OS=Homo sapiens GN=SEN7 PE=1 SV=4                         | Q9BQF6        | 1              |            |         |
| Reticulocalbin-2 OS=Homo sapiens GN=RCN2 PE=1 SV=1                                    | Q14257        | 1              | 1          |         |
| RelA-associated inhibitor OS=Homo sapiens GN=PPP1R13L PE=1 SV=4                       | Q8WUF5        | 1              |            |         |
| Tubulin polyglutamylase TTL6 OS=Homo sapiens GN=TLL6 PE=2 SV=2                        | Q8N841        | 1              |            |         |
| Serine protease 55 OS=Homo sapiens GN=PRSS55 PE=2 SV=2                                | Q6UWB4        | 1              |            |         |
| RB1-inducible coiled-coil protein 1 OS=Homo sapiens GN=RB1CC1 PE=1 SV=3               | Q8TDY2        | 1              |            |         |
| Signal recognition particle 68 kDa protein OS=Homo sapiens GN=SRP68 PE=1 SV=2         | Q9UHB9        | 1              |            |         |
| Ras-related protein Rab-37 OS=Homo sapiens GN=RAB37 PE=1 SV=3                         | Q96AX2        | 1              |            |         |

| Protein peptides                                                                     | Accession No. | icPTPRD-D1521A | icPTPRD-WT | Control |
|--------------------------------------------------------------------------------------|---------------|----------------|------------|---------|
| Ras GTPase-activating-like protein IQGAP1 OS=Homo sapiens GN=IQGAP1 PE=1 SV=1        | P46940        | 1              |            | 6       |
| Septin-12 OS=Homo sapiens GN=SEPT12 PE=1 SV=1                                        | Q8IYM1        | 1              |            |         |
| Tumor protein 63 OS=Homo sapiens GN=TP63 PE=1 SV=1                                   | Q9H3D4        | 1              |            |         |
| Transcription factor E2F1 OS=Homo sapiens GN=E2F1 PE=1 SV=1                          | Q01094        | 1              | 2          | 2       |
| Type I inositol-3,4-bisphosphate 4-phosphatase OS=Homo sapiens GN=INPP4A PE=1 SV=1   | Q96PE3        | 1              |            |         |
| Receptor-type tyrosine-protein phosphatase T OS=Homo sapiens GN=PTPRT PE=1 SV=5      | O14522        | 1              | 1          |         |
| Zinc finger CCCH domain-containing protein 7B OS=Homo sapiens GN=ZC3H7B PE=1 SV=1    | Q9UGR2        | 1              |            |         |
| Shugoshin-like 2 OS=Homo sapiens GN=SGOL2 PE=1 SV=2                                  | Q562F6        | 1              |            |         |
| WD repeat-containing protein 87 OS=Homo sapiens GN=WDR87 PE=2 SV=3                   | Q6ZQQ6        | 1              |            |         |
| Xanthine dehydrogenase/oxidase OS=Homo sapiens GN=XDH PE=1 SV=4                      | P47989        | 1              |            |         |
| Spindlin-3 OS=Homo sapiens GN=SPIN3 PE=2 SV=1                                        | Q5JUX0        | 1              |            |         |
| X-linked retinitis pigmentosa GTPase regulator OS=Homo sapiens GN=RPGR PE=1 SV=2     | Q92834        | 1              |            |         |
| Zinc finger and BTB domain-containing protein 34 OS=Homo sapiens GN=ZBTB34 PE=2 SV=4 | Q8NCN2        | 1              |            |         |
| Zinc finger protein 161 homolog OS=Homo sapiens GN=ZFP161 PE=2 SV=2                  | O43829        | 1              |            |         |
| Probable phospholipid-transporting ATPase IK OS=Homo sapiens GN=ATP8B3 PE=2 SV=4     | O60423        | 1              | 1          | 1       |
| Sperm-associated antigen 8 OS=Homo sapiens GN=SPAG8 PE=1 SV=2                        | Q99932        | 1              |            |         |
| Probable histone-lysine N-methyltransferase NSD2 OS=Homo sapiens GN=WHSC1 PE=1 SV=1  | O96028        | 1              |            |         |
| Probable helicase with zinc finger domain OS=Homo sapiens GN=HELZ PE=1 SV=2          | P42694        | 1              |            |         |
| Zinc finger FYVE domain-containing protein 1 OS=Homo sapiens GN=ZFYVE1 PE=1 SV=1     | Q9HBF4        | 1              |            |         |

| Protein peptides                                                                                   | Accession No. | icPTPRD-D1521A | icPTPRD-WT | Control |
|----------------------------------------------------------------------------------------------------|---------------|----------------|------------|---------|
| Zinc finger FYVE domain-containing protein 9 OS=Homo sapiens GN=ZFYVE9 PE=1 SV=2                   | O95405        | 1              |            |         |
| Zinc finger matrin-type protein 2 OS=Homo sapiens GN=ZMAT2 PE=1 SV=1                               | Q96NC0        | 1              |            |         |
| UPF0568 protein C14orf166 OS=Homo sapiens GN=C14orf166 PE=1 SV=1                                   | Q9Y224        | 1              |            |         |
| Profilin-2 OS=Homo sapiens GN=PFN2 PE=1 SV=3                                                       | P35080        | 1              |            |         |
| Very long-chain specific acyl-CoA dehydrogenase, mitochondrial OS=Homo sapiens GN=ACADVL PE=1 SV=1 | P49748        | 1              |            |         |
| Protein AHNAK2 OS=Homo sapiens GN=AHNAK2 PE=1 SV=2                                                 | Q8IVF2        | 1              |            | 1       |
| Protein AF1q OS=Homo sapiens GN=MLLT11 PE=2 SV=1                                                   | Q13015        | 1              |            |         |
| Uronyl 2-sulfotransferase OS=Homo sapiens GN=UST PE=2 SV=1                                         | Q9Y2C2        | 1              |            |         |
| Proteasome-associated protein ECM29 homolog OS=Homo sapiens GN=ECM29 PE=1 SV=2                     | Q5VYK3        | 1              |            |         |
| Sorting nexin-20 OS=Homo sapiens GN=SNX20 PE=1 SV=1                                                | Q7Z614        | 1              |            | 1       |
| T-box transcription factor TBX5 OS=Homo sapiens GN=TBX5 PE=1 SV=2                                  | Q99593        | 1              |            |         |
| TATA-binding protein-associated factor 172 OS=Homo sapiens GN=BTAF1 PE=1 SV=2                      | O14981        | 1              |            | 1       |
| Spectrin beta chain, brain 3 OS=Homo sapiens GN=SPTBN4 PE=1 SV=2                                   | Q9H254        | 1              |            | 1       |
| Protein furry homolog-like OS=Homo sapiens GN=FRYL PE=1 SV=2                                       | O94915        | 1              |            |         |
| Vesicular glutamate transporter 1 OS=Homo sapiens GN=SLC17A7 PE=2 SV=1                             | Q9P2U7        | 1              |            |         |
| Voltage-dependent L-type calcium channel subunit alpha-1C OS=Homo sapiens GN=CACNA1C PE=1 SV=4     | Q13936        | 1              |            |         |
| TBC1 domain family member 8B OS=Homo sapiens GN=TBC1D8B PE=2 SV=2                                  | Q0IIM8        | 1              |            |         |
| Spectrin beta chain, brain 4 OS=Homo sapiens GN=SPTBN5 PE=1 SV=1                                   | Q9NRC6        | 1              |            |         |
| TBC1 domain family member 10B OS=Homo sapiens GN=TBC1D10B PE=1 SV=3                                | Q4KMP7        | 1              |            |         |

| Protein peptides                                                                                            | Accession No. | icPTPRD-D1521A | icPTPRD-WT | Control |
|-------------------------------------------------------------------------------------------------------------|---------------|----------------|------------|---------|
| WAP, kazal, immunoglobulin, kunitz and NTR domain-containing protein 1 OS=Homo sapiens GN=WFIKKN1 PE=1 SV=1 | Q96NZ8        | 1              |            |         |
| Splicing factor 3A subunit 2 OS=Homo sapiens GN=SF3A2 PE=1 SV=2                                             | Q15428        | 1              |            |         |
| V_segment translation product (Fragment) OS=Homo sapiens GN=TCRBV18S1                                       | A0A5B2        | 1              |            |         |
| Src substrate cortactin OS=Homo sapiens GN=CTTN PE=1 SV=2                                                   | Q14247        | 1              |            |         |
| Zinc finger protein 536 OS=Homo sapiens GN=ZNF536 PE=1 SV=3                                                 | O15090        | 1              |            | 1       |
| Splicing factor 3B subunit 5 OS=Homo sapiens GN=SF3B5 PE=1 SV=1                                             | Q9BWJ5        | 1              |            |         |
| Polyadenylate-binding protein 1 OS=Homo sapiens GN=PABPC1 PE=1 SV=2                                         | P11940        | 1              | 3          | 1       |
| Poly(rC)-binding protein 2 OS=Homo sapiens GN=PCBP2 PE=1 SV=1                                               | Q15366        | 1              |            | 2       |
| Poly(rC)-binding protein 1 OS=Homo sapiens GN=PCBP1 PE=1 SV=2                                               | Q15365        | 1              | 1          | 4       |
| Sushi domain-containing protein 2 OS=Homo sapiens GN=SUSD2 PE=1 SV=1                                        | Q9UGT4        | 1              |            |         |
| Zinc finger protein 134 OS=Homo sapiens GN=ZNF134 PE=2 SV=2                                                 | P52741        | 1              |            |         |
| Splicing factor, proline- and glutamine-rich OS=Homo sapiens GN=SFPQ PE=1 SV=2                              | P23246        | 1              |            |         |
| Zinc finger protein 526 OS=Homo sapiens GN=ZNF526 PE=2 SV=2                                                 | Q8TF50        | 1              |            |         |
| Zinc finger protein 99 OS=Homo sapiens GN=ZNF99 PE=2 SV=2                                                   | A8MX4         | 1              |            |         |
| StAR-related lipid transfer protein 9 OS=Homo sapiens GN=STARD9 PE=2 SV=2                                   | Q9P2P6        | 1              |            |         |
| Structural maintenance of chromosomes protein 2 OS=Homo sapiens GN=SMC2 PE=1 SV=2                           | O95347        | 1              |            |         |
| Zinc finger ZZ-type and EF-hand domain-containing protein 1 OS=Homo sapiens GN=ZZEF1 PE=1 SV=6              | O43149        | 1              |            |         |
| Suppressor of cytokine signaling 7 OS=Homo sapiens GN=SOCS7 PE=1 SV=2                                       | O14512        | 1              |            |         |
| SUN domain-containing protein 2 OS=Homo sapiens GN=SUN2 PE=1 SV=3                                           | Q9UH99        | 1              |            |         |

| Protein peptides                                                                                             | Accession No. | icPTPRD-D1521A | icPTPRD-WT | Control |
|--------------------------------------------------------------------------------------------------------------|---------------|----------------|------------|---------|
| Zinc finger protein 648 OS=Homo sapiens GN=ZNF648 PE=1 SV=1                                                  | Q5T619        | 1              |            |         |
| Prefoldin subunit 2 OS=Homo sapiens GN=PFDN2 PE=1 SV=1                                                       | Q9UHV9        | 1              | 1          |         |
| Splicing factor 3B subunit 4 OS=Homo sapiens GN=SF3B4 PE=1 SV=1                                              | Q15427        | 1              | 1          |         |
| Probable 2-oxoglutarate dehydrogenase E1 component DHKTD1, mitochondrial OS=Homo sapiens GN=DHTKD1 PE=2 SV=2 | Q96HY7        | 1              |            | 1       |
| PRO0195 OS=Homo sapiens                                                                                      | Q9UI79        | 1              |            |         |
| Pre-mRNA-splicing factor SPF27 OS=Homo sapiens GN=BCAS2 PE=1 SV=1                                            | O75934        | 1              |            |         |
| Zinc finger protein 318 OS=Homo sapiens GN=ZNF318 PE=1 SV=2                                                  | Q5VUA4        | 1              |            |         |
| Zinc finger protein 35 OS=Homo sapiens GN=ZNF35 PE=2 SV=4                                                    | P13682        | 1              |            |         |
| Polyhomeotic-like protein 2 OS=Homo sapiens GN=PHC2 PE=1 SV=1                                                | Q8IXK0        | 1              |            |         |
| Prefoldin subunit 4 OS=Homo sapiens GN=PFDN4 PE=1 SV=1                                                       | Q9NQP4        | 1              |            |         |
| Zinc finger protein 528 OS=Homo sapiens GN=ZNF528 PE=2 SV=1                                                  | Q3MIS6        | 1              |            |         |
| Prefoldin subunit 1 OS=Homo sapiens GN=PFDN1 PE=1 SV=2                                                       | O60925        | 1              |            |         |
| PRAME family member 20/21 OS=Homo sapiens GN=PRAMEF20 PE=2 SV=1                                              | Q5VT98        | 1              |            |         |
| Potassium voltage-gated channel subfamily A member 2 OS=Homo sapiens GN=KCNA2 PE=1 SV=2                      | P16389        | 1              |            |         |
| Potassium channel subfamily K member 5 OS=Homo sapiens GN=KCNK5 PE=1 SV=1                                    | O95279        | 1              |            |         |
| Synaptonemal complex protein 2-like OS=Homo sapiens GN=SYCP2L PE=1 SV=2                                      | Q5T4T6        | 1              |            |         |
| Zinc finger protein 469 OS=Homo sapiens GN=ZNF469 PE=1 SV=3                                                  | Q96JG9        | 1              |            | 1       |
| Proteasomal ubiquitin receptor ADRM1 OS=Homo sapiens GN=ADRM1 PE=1 SV=2                                      | Q16186        | 1              |            | 1       |
| Prefoldin subunit 5 OS=Homo sapiens GN=PFDN5 PE=1 SV=2                                                       | Q99471        | 1              | 1          |         |



| Protein peptides                                                         | Accession No. | icPTPRD-D1521A | icPTPRD-WT | Control |
|--------------------------------------------------------------------------|---------------|----------------|------------|---------|
| Uncharacterized protein KIAA1109 OS=Homo sapiens GN=KIAA1109 PE=1 SV=1   | Q2LD37        | 1              | 1          |         |
| Uncharacterized protein OS=Homo sapiens GN=RECQL4                        | C9JFV7        | 1              |            | 1       |
| T-complex protein 10A homolog 2 OS=Homo sapiens GN=TCP10L PE=2 SV=1      | Q8TDR4        | 1              |            |         |
| Protein CIP2A OS=Homo sapiens GN=KIAA1524 PE=1 SV=2                      | Q8TCG1        | 1              |            |         |
| T-complex protein 1 subunit zeta-2 OS=Homo sapiens GN=CCT6B PE=1 SV=4    | Q92526        | 1              |            |         |
| Uncharacterized protein OS=Homo sapiens GN=PUM1                          | A6NDW8        | 1              |            |         |
| Protein FAM65B OS=Homo sapiens GN=FAM65B PE=1 SV=4                       | Q9Y4F9        | 1              |            |         |
| Protein FAM59A OS=Homo sapiens GN=FAM59A PE=1 SV=2                       | Q9H706        | 1              |            |         |
| Solute carrier family 22 member 13 OS=Homo sapiens GN=SLC22A13 PE=2 SV=2 | Q9Y226        | 1              |            |         |
| Sortilin OS=Homo sapiens GN=SORT1 PE=1 SV=3                              | Q99523        | 1              |            |         |
| Protein FAM73B OS=Homo sapiens GN=FAM73B PE=1 SV=1                       | Q7L4E1        | 1              |            |         |
| Uncharacterized protein OS=Homo sapiens GN=FBLN7                         | B8ZC1         | 1              |            |         |
| Protein FAM5B OS=Homo sapiens GN=FAM5B PE=2 SV=2                         | Q9C0B6        | 1              |            |         |
| Protein Daple OS=Homo sapiens GN=CCDC88C PE=1 SV=3                       | Q9P219        | 1              |            |         |
| Uncharacterized protein OS=Homo sapiens GN=ARMC9                         | C9J535        | 1              |            |         |
| Protein FAM195B OS=Homo sapiens GN=FAM195B PE=1 SV=1                     | C9JLW8        | 1              |            |         |
| Protein DJ-1 OS=Homo sapiens GN=PARK7 PE=1 SV=2                          | Q99497        | 1              |            |         |
| Son of sevenless homolog 1 OS=Homo sapiens GN=SOS1 PE=1 SV=1             | Q07889        | 1              |            |         |
| Protein FAM102A OS=Homo sapiens GN=FAM102A PE=2 SV=2                     | Q5T9C2        | 1              | 2          |         |

| Protein peptides                                                                                                         | Accession No. | icPTPRD-D1521A | icPTPRD-WT | Control |
|--------------------------------------------------------------------------------------------------------------------------|---------------|----------------|------------|---------|
| Protein AKNAD1 OS=Homo sapiens GN=AKNAD1 PE=2 SV=2                                                                       | Q5T1N1        | 1              |            |         |
| TAT protein OS=Homo sapiens                                                                                              | Q8WW92        | 1              |            |         |
| Uncharacterized protein OS=Homo sapiens                                                                                  | A8MY96        | 1              |            |         |
| Protein FAM172A OS=Homo sapiens GN=FAM172A PE=2 SV=1                                                                     | Q8WUF8        | 1              |            |         |
| Solute carrier family 22 member 15 OS=Homo sapiens GN=SLC22A15 PE=2 SV=1                                                 | Q8IZD6        | 1              | 1          |         |
| Uncharacterized protein OS=Homo sapiens GN=SNTN                                                                          | C9JRU3        | 1              |            | 1       |
| Protein BAT2-like 2 OS=Homo sapiens GN=BAT2L2 PE=1 SV=2                                                                  | Q9Y520        | 1              |            | 1       |
| Uncharacterized protein OS=Homo sapiens GN=SUMO3                                                                         | A8MU27        | 1              |            |         |
| Sodium/iodide cotransporter OS=Homo sapiens GN=SLC5A5 PE=1 SV=1                                                          | Q92911        | 1              |            |         |
| Uncharacterized protein C9orf84 OS=Homo sapiens GN=C9orf84 PE=2 SV=1                                                     | Q5VXU9        | 1              |            |         |
| Uncharacterized protein KIAA0141, mitochondrial OS=Homo sapiens GN=KIAA0141 PE=2 SV=3                                    | Q14154        | 1              |            |         |
| Protein BAT2-like 1 OS=Homo sapiens GN=BAT2L1 PE=1 SV=2                                                                  | Q5JSZ5        | 1              |            |         |
| T-complex protein 1 subunit gamma OS=Homo sapiens GN=CCT3 PE=1 SV=4                                                      | P49368        | 1              | 1          | 5       |
| T-complex protein 11-like protein 1 OS=Homo sapiens GN=TCP11L1 PE=1 SV=1                                                 | Q9NUJ3        | 1              |            |         |
| Sodium/hydrogen exchanger OS=Homo sapiens                                                                                | B4DX51        | 1              |            |         |
| Cytoplasmic dynein 1 light intermediate chain 2 OS=Homo sapiens GN=DYNC1LI2 PE=1 SV=1                                    | O43237        |                |            | 1       |
| cDNA FLJ55789, highly similar to Rattus norvegicus basic leucine zipper and W2 domains 1 (Bzw1), mRNA OS=Homo sapiens    | B4DLZ8        |                |            | 1       |
| cDNA FLJ54712, highly similar to Tight junction protein ZO-2 OS=Homo sapiens                                             | B7Z7T6        |                |            | 1       |
| cDNA FLJ54162, moderately similar to CDP-diacylglycerol--inositol3-phosphatidyltransferase (EC 2.7.8.11) OS=Homo sapiens | B4DUV0        |                | 1          |         |

| Protein peptides                                                                                                                | Accession No. | icPTPRD-D1521A | icPTPRD-WT | Control |
|---------------------------------------------------------------------------------------------------------------------------------|---------------|----------------|------------|---------|
| Collagen alpha-1(I) chain OS=Homo sapiens GN=COL1A1 PE=1 SV=5                                                                   | P02452        |                | 1          |         |
| Coatomer subunit zeta-1 OS=Homo sapiens GN=COPZ1 PE=1 SV=1                                                                      | P61923        |                |            | 2       |
| Coiled-coil domain-containing protein 33 OS=Homo sapiens GN=CCDC33 PE=1 SV=3                                                    | Q8N5R6        |                | 3          | 1       |
| Tenascin-X OS=Homo sapiens GN=TNXB PE=1 SV=3                                                                                    | P22105        |                | 1          |         |
| Cytochrome b5 reductase 4 OS=Homo sapiens GN=CYB5R4 PE=1 SV=1                                                                   | Q7L1T6        |                |            | 1       |
| Translation initiation factor eIF-2B subunit epsilon OS=Homo sapiens GN=EIF2B5 PE=1 SV=3                                        | Q13144        |                |            | 1       |
| cDNA FLJ57032, moderately similar to Tubulin-specific chaperone E OS=Homo sapiens                                               | B7Z4X8        |                | 1          |         |
| Suppression of tumorigenicity 18 protein OS=Homo sapiens GN=ST18 PE=1 SV=1                                                      | O60284        |                | 1          |         |
| Coatomer subunit beta OS=Homo sapiens GN=COPB1 PE=1 SV=3                                                                        | P53618        |                | 1          | 2       |
| Cylicin-1 OS=Homo sapiens GN=CYLC1 PE=1 SV=2                                                                                    | P35663        |                | 1          |         |
| Synaptonemal complex protein 3 OS=Homo sapiens GN=SYCP3 PE=2 SV=1                                                               | Q8IZU3        |                | 1          |         |
| Coatomer subunit alpha OS=Homo sapiens GN=COPA PE=1 SV=2                                                                        | P53621        |                |            | 1       |
| CCR4-NOT transcription complex subunit 10 OS=Homo sapiens GN=CNOT10 PE=1 SV=1                                                   | Q9H9A5        |                | 1          |         |
| Translational activator GCN1 OS=Homo sapiens GN=GCN1L1 PE=1 SV=6                                                                | Q92616        |                |            | 1       |
| cDNA FLJ46097 fis, clone TESTI2021112 OS=Homo sapiens                                                                           | Q6ZRU3        |                | 1          |         |
| cDNA FLJ37345 fis, clone BRAMY2021142, highly similar to Homo sapiens transmembrane channel-like 7 (TMC7), mRNA OS=Homo sapiens | B3KSZ3        |                |            | 1       |
| cDNA FLJ40178 fis, clone TESTI2017932 OS=Homo sapiens                                                                           | Q8N7Z9        |                |            | 1       |
| Transient receptor potential cation channel subfamily M member 8 OS=Homo sapiens GN=TRPM8 PE=2 SV=2                             | Q7Z2W7        |                | 1          |         |
| Coiled-coil domain-containing protein 147 OS=Homo sapiens GN=CCDC147 PE=2 SV=1                                                  | Q5T655        |                | 1          |         |

| Protein peptides                                                                                                                      | Accession No. | icPTPRD-D1521A | icPTPRD-WT | Control |
|---------------------------------------------------------------------------------------------------------------------------------------|---------------|----------------|------------|---------|
| cDNA FLJ43252 fis, clone HEART2006909 OS=Homo sapiens                                                                                 | Q6ZUX1        |                | 1          |         |
| Coiled-coil domain-containing protein 36 OS=Homo sapiens GN=CCDC36 PE=1 SV=2                                                          | Q8IYA8        |                |            | 1       |
| CDNA FLJ26488 fis, clone KDN05770, highly similar to Bumetanide-sensitive sodium-(potassium)-chloride cotransporter 2 OS=Homo sapiens | Q6ZP54        |                | 2          | 2       |
| cDNA FLJ16186 fis, clone BRTHA2007060, moderately similar to EUKARYOTIC TRANSLATION INITIATION FACTOR 3 SUBUNIT 10 OS=Homo sapiens    | Q6ZNE1        |                |            | 1       |
| Coiled-coil domain-containing protein 144A OS=Homo sapiens GN=CCDC144A PE=1 SV=1                                                      | A2RUR9        |                |            | 1       |
| Transcription factor E2F2 OS=Homo sapiens GN=E2F2 PE=1 SV=1                                                                           | Q14209        |                | 1          |         |
| Cytoplasmic dynein 1 light intermediate chain 1 OS=Homo sapiens GN=DYNC1LI1 PE=1 SV=3                                                 | Q9Y6G9        |                |            | 1       |
| Collagen alpha-1(IV) chain OS=Homo sapiens GN=COL4A1 PE=1 SV=3                                                                        | P02462        |                |            | 1       |
| Coiled-coil domain-containing protein 14 OS=Homo sapiens GN=CCDC14 PE=2 SV=3                                                          | Q49A88        |                |            | 1       |
| cDNA FLJ52272, highly similar to Rhabdoid tumor deletion region protein 1 OS=Homo sapiens                                             | B7Z5X4        |                |            | 1       |
| cDNA FLJ52882, highly similar to Pyruvate dehydrogenase (lipoamide) kinase isozyme 2 (EC 2.7.11.2) OS=Homo sapiens                    | B4DEF3        |                | 1          |         |
| Cytoplasmic dynein 1 intermediate chain 2 OS=Homo sapiens GN=DYNC1I2 PE=1 SV=3                                                        | Q13409        |                |            | 1       |
| Transducin beta-like protein 3 OS=Homo sapiens GN=TBL3 PE=1 SV=2                                                                      | Q12788        |                |            | 1       |
| Transcriptional regulator ATRX OS=Homo sapiens GN=ATRX PE=1 SV=5                                                                      | P46100        |                |            | 1       |
| Coiled-coil domain-containing protein 125 OS=Homo sapiens GN=CCDC125 PE=2 SV=2                                                        | Q86Z20        |                |            | 1       |
| cDNA FLJ53577, highly similar to pre-mRNA-splicing factor ATP-dependentRNA helicase DHX16 (EC 3.6.1.-) OS=Homo sapiens                | B4DZ28        |                | 1          | 1       |
| Cytochrome c oxidase subunit 6A1, mitochondrial OS=Homo sapiens GN=COX6A1 PE=1 SV=4                                                   | P12074        |                | 1          |         |
| cDNA FLJ32537 fis, clone SMINT2000400, highly similar to Homo sapiens FRG1 mRNA OS=Homo sapiens                                       | Q96MD3        |                |            | 1       |
| Coiled-coil domain-containing protein 110 OS=Homo sapiens GN=CCDC110 PE=2 SV=1                                                        | Q8TBZ0        |                |            | 1       |

| Protein peptides                                                                         | Accession No. | icPTPRD-D1521A | icPTPRD-WT | Control |
|------------------------------------------------------------------------------------------|---------------|----------------|------------|---------|
| Translation initiation factor eIF-2B subunit beta OS=Homo sapiens GN=EIF2B2 PE=1 SV=3    | P49770        |                |            | 1       |
| Chloride channel protein CIC-Ka OS=Homo sapiens GN=CLCNKA PE=1 SV=1                      | P51800        |                |            | 1       |
| Transcription factor EB OS=Homo sapiens GN=TFEB                                          | B0QYS6        |                | 1          |         |
| TPH2 protein OS=Homo sapiens GN=TPH2                                                     | Q14CC5        |                | 1          |         |
| Chromosome 20 open reading frame 4 OS=Homo sapiens GN=C20orf4                            | A2A2Q9        |                |            | 1       |
| Toll-like receptor 8 OS=Homo sapiens GN=TLR8 PE=1 SV=1                                   | Q9NR97        |                | 1          |         |
| Conserved oligomeric Golgi complex subunit 2 OS=Homo sapiens GN=COG2 PE=1 SV=1           | Q14746        |                |            | 1       |
| Tetratricopeptide repeat protein 5 OS=Homo sapiens GN=TTC5 PE=1 SV=2                     | Q8N0Z6        |                | 1          | 1       |
| Tissue factor pathway inhibitor 2 OS=Homo sapiens GN=TFPI2 PE=1 SV=1                     | P48307        |                | 1          |         |
| Tetratricopeptide repeat protein 7A OS=Homo sapiens GN=TTC7A PE=1 SV=3                   | Q9ULT0        |                |            | 1       |
| Chromobox protein homolog 8 OS=Homo sapiens GN=CBX8 PE=1 SV=3                            | Q9HC52        |                |            | 1       |
| Cell division cycle and apoptosis regulator protein 1 OS=Homo sapiens GN=CCAR1 PE=1 SV=2 | Q8IX12        |                | 1          |         |
| Condensin-2 complex subunit H2 OS=Homo sapiens GN=NCAPH2 PE=1 SV=1                       | Q6IBW4        |                | 1          |         |
| Collagen alpha-2(VI) chain OS=Homo sapiens GN=COL6A2 PE=1 SV=4                           | P12110        |                |            | 1       |
| Taste receptor type 2 member 19 OS=Homo sapiens GN=TAS2R19 PE=1 SV=1                     | P59542        |                | 1          |         |
| Thrombospondin type-1 domain-containing protein 1 OS=Homo sapiens GN=THSD1 PE=1 SV=1     | Q9NS62        |                | 1          | 1       |
| Talin-1 OS=Homo sapiens GN=TLN1 PE=1 SV=3                                                | Q9Y490        |                |            | 6       |
| Cell growth-inhibiting protein 48c OS=Homo sapiens                                       | B1H0U4        |                |            | 1       |
| Threonyl-tRNA synthetase, mitochondrial OS=Homo sapiens GN=TARS2 PE=1 SV=1               | Q9BW92        |                | 1          |         |

| Protein peptides                                                                               | Accession No. | icPTPRD-D1521A | icPTPRD-WT | Control |
|------------------------------------------------------------------------------------------------|---------------|----------------|------------|---------|
| Centriolin OS=Homo sapiens GN=CEP110 PE=1 SV=2                                                 | Q7Z7A1        |                |            | 1       |
| Centromere protein C 1 OS=Homo sapiens GN=CENPC1 PE=1 SV=2                                     | Q03188        |                |            | 1       |
| T-box transcription factor TBX19 OS=Homo sapiens GN=TBX19 PE=1 SV=3                            | O60806        |                |            | 1       |
| Complexin-2 OS=Homo sapiens GN=CPLX2 PE=1 SV=2                                                 | Q6PUV4        |                |            | 1       |
| THAP domain-containing protein 5 OS=Homo sapiens GN=THAP5 PE=1 SV=2                            | Q7Z6K1        |                | 1          |         |
| Chaperone activity of bc1 complex-like, mitochondrial OS=Homo sapiens GN=CABC1 PE=1 SV=1       | Q8NI60        |                |            | 1       |
| Complement component C8 beta chain OS=Homo sapiens GN=C8B PE=1 SV=3                            | P07358        |                |            | 1       |
| Thioredoxin-like protein 1 OS=Homo sapiens GN=TXNL1 PE=1 SV=3                                  | O43396        |                |            | 1       |
| Complement C1q tumor necrosis factor-related protein 5 OS=Homo sapiens GN=C1QTNF5 PE=1 SV=1    | Q9BXJ0        |                | 1          | 1       |
| Centrosome and spindle pole-associated protein 1 OS=Homo sapiens GN=CSPP1 PE=1 SV=4            | Q1MSJ5        |                | 1          |         |
| Complement component C7 OS=Homo sapiens GN=C7 PE=1 SV=2                                        | P10643        |                |            | 1       |
| Cholecystokinin B receptor splice variant long isoform (Fragment) OS=Homo sapiens GN=CCKBR     | A0SEH4        |                |            | 1       |
| cDNA FLJ61364, highly similar to Gamma-glutamyltransferase 4 (EC 2.3.2.2) OS=Homo sapiens      | B4DRZ0        |                |            | 1       |
| Transcription factor SOX-12 OS=Homo sapiens GN=SOX12 PE=2 SV=2                                 | O15370        |                |            | 2       |
| Transcription factor jun-B OS=Homo sapiens GN=JUNB PE=1 SV=1                                   | P17275        |                | 4          | 1       |
| CWF19-like protein 2 OS=Homo sapiens GN=CWF19L2 PE=1 SV=4                                      | Q2TBE0        |                |            | 1       |
| cDNA FLJ58291, moderately similar to Neutral alpha-glucosidase C (EC 3.2.1.20) OS=Homo sapiens | B4DWC5        |                |            | 1       |
| Testin OS=Homo sapiens GN=TES PE=1 SV=1                                                        | Q9UGI8        |                | 1          |         |
| CVWG5837 OS=Homo sapiens GN=UNQ5837                                                            | Q6UXY5        |                |            | 1       |

| Protein peptides                                                                                                           | Accession No. | icPTPRD-D1521A | icPTPRD-WT | Control |
|----------------------------------------------------------------------------------------------------------------------------|---------------|----------------|------------|---------|
| cDNA FLJ59202, moderately similar to Homo sapiens CGI-121 protein (CGI-121), mRNA OS=Homo sapiens                          | B4DHS0        |                |            | 1       |
| cDNA FLJ59586, highly similar to Diacylglycerol kinase zeta (EC 2.7.1.107) OS=Homo sapiens                                 | B7Z1L2        |                |            | 1       |
| Collagen alpha-1(V) chain OS=Homo sapiens GN=COL5A1 PE=1 SV=3                                                              | P20908        |                | 1          |         |
| Synaptophysin OS=Homo sapiens GN=SYP PE=1 SV=3                                                                             | P08247        |                | 1          |         |
| Coagulation factor V OS=Homo sapiens GN=F5 PE=1 SV=4                                                                       | P12259        |                | 1          |         |
| cDNA FLJ60845, highly similar to Telomere-associated protein RIF1 OS=Homo sapiens                                          | B4DS49        |                | 1          |         |
| CLASP2 protein OS=Homo sapiens GN=CLASP2                                                                                   | B2RTR1        |                | 1          |         |
| cDNA FLJ61332, highly similar to Rho-GTPase-activating protein 25 OS=Homo sapiens                                          | B7Z5A5        |                |            | 1       |
| Coagulation factor XIII A chain OS=Homo sapiens GN=F13A1 PE=1 SV=4                                                         | P00488        |                |            | 1       |
| cDNA FLJ61688 OS=Homo sapiens                                                                                              | B4DK58        |                |            | 1       |
| Collagen alpha-1(VII) chain OS=Homo sapiens GN=COL7A1 PE=1 SV=2                                                            | Q02388        |                | 1          | 1       |
| Crumbs homolog 1 OS=Homo sapiens GN=CRB1 PE=1 SV=2                                                                         | P82279        |                |            | 1       |
| cDNA FLJ76742, highly similar to Homo sapiens deleted in liver cancer 1 (DLC1), transcript variant 2, mRNA OS=Homo sapiens | A8K119        |                |            | 1       |
| Testis-expressed sequence 15 protein OS=Homo sapiens GN=TEX15 PE=1 SV=2                                                    | Q9BXT5        |                | 1          |         |
| Collagen alpha-1(XVII) chain OS=Homo sapiens GN=COL17A1 PE=1 SV=3                                                          | Q9UMD9        |                |            | 1       |
| Syntenin-1 OS=Homo sapiens GN=SDCBP PE=1 SV=1                                                                              | O00560        |                |            | 2       |
| Clusterin OS=Homo sapiens GN=CLU PE=1 SV=1                                                                                 | P10909        |                | 1          |         |
| CLIP-associating protein 1 OS=Homo sapiens GN=CLASP1 PE=1 SV=1                                                             | Q7Z460        |                |            | 1       |
| T-complex protein 1 subunit zeta OS=Homo sapiens GN=CCT6A PE=1 SV=3                                                        | P40227        |                | 2          | 5       |

| Protein peptides                                                                                      | Accession No. | icPTPRD-D1521A | icPTPRD-WT | Control |
|-------------------------------------------------------------------------------------------------------|---------------|----------------|------------|---------|
| Tetratricopeptide repeat protein 25 OS=Homo sapiens GN=TTC25 PE=1 SV=2                                | Q96NG3        |                |            | 1       |
| cDNA: FLJ22753 fis, clone KAIA0597 OS=Homo sapiens                                                    | Q9H5Z5        |                | 1          |         |
| Copine-5 OS=Homo sapiens GN=CPNE5 PE=1 SV=2                                                           | Q9HCH3        |                |            | 1       |
| Synaptosomal-associated protein 29 OS=Homo sapiens GN=SNAP29 PE=1 SV=1                                | O95721        |                |            | 1       |
| Uncharacterized protein KIAA0748 OS=Homo sapiens GN=KIAA0748 PE=1 SV=2                                | A2RU30        |                | 1          |         |
| Uncharacterized protein OS=Homo sapiens GN=SPIN2A                                                     | A6NMQ5        |                | 1          |         |
| Uncharacterized protein C9orf170 OS=Homo sapiens GN=C9orf170 PE=2 SV=1                                | A2RU37        |                |            | 1       |
| Acyl-CoA dehydrogenase family member 11 OS=Homo sapiens GN=ACAD11 PE=1 SV=2                           | Q709F0        |                |            | 1       |
| Activating signal cointegrator 1 complex subunit 3 OS=Homo sapiens GN=ASCC3 PE=1 SV=3                 | Q8N3C0        |                |            | 1       |
| Uncharacterized protein C9orf172 OS=Homo sapiens GN=C9orf172 PE=3 SV=1                                | C9J069        |                |            | 1       |
| Uncharacterized protein C9orf50 OS=Homo sapiens GN=C9orf50 PE=2 SV=1                                  | Q5SZB4        |                |            | 1       |
| Actin-binding protein IPP OS=Homo sapiens GN=IPP PE=2 SV=1                                            | Q9Y573        |                | 2          |         |
| Actin, alpha skeletal muscle OS=Homo sapiens GN=ACTA1 PE=1 SV=1                                       | P68133        |                |            | 1       |
| Acetylcholine receptor subunit beta OS=Homo sapiens GN=CHRNA1 PE=1 SV=3                               | P11230        |                |            | 1       |
| ADP-ribosylation factor-like protein 3 OS=Homo sapiens GN=ARL3 PE=1 SV=2                              | P36405        |                | 1          |         |
| A disintegrin and metalloproteinase with thrombospondin motifs 2 OS=Homo sapiens GN=ADAMTS2 PE=2 SV=2 | O95450        |                | 1          | 1       |
| Adseverin OS=Homo sapiens GN=SCIN PE=1 SV=4                                                           | Q9Y6U3        |                |            | 1       |
| Uncharacterized protein KIAA1210 OS=Homo sapiens GN=KIAA1210 PE=2 SV=3                                | Q9ULL0        |                |            | 1       |
| Uncharacterized protein KIAA1211 OS=Homo sapiens GN=KIAA1211 PE=1 SV=3                                | Q6ZU35        |                | 1          |         |



| Protein peptides                                                                                         | Accession No. | icPTPRD-D1521A | icPTPRD-WT | Control |
|----------------------------------------------------------------------------------------------------------|---------------|----------------|------------|---------|
| 6-phosphofructokinase, liver type OS=Homo sapiens GN=PFKL PE=1 SV=6                                      | P17858        |                | 2          |         |
| Uncharacterized protein OS=Homo sapiens                                                                  | C9JH24        |                |            | 1       |
| Uncharacterized protein OS=Homo sapiens GN=INS                                                           | C9JNR5        |                | 1          |         |
| Uncharacterized protein OS=Homo sapiens GN=LIMS3                                                         | A6NEJ8        |                |            | 1       |
| Uncharacterized protein OS=Homo sapiens GN=OR10J3                                                        | B5MD10        |                |            | 1       |
| Uncharacterized protein OS=Homo sapiens GN=PLA2G4E                                                       | B7WPN2        |                |            | 1       |
| Uncharacterized protein C13orf40 OS=Homo sapiens GN=C13orf40 PE=2 SV=2                                   | Q8NDH2        |                | 1          |         |
| Uncharacterized protein KIAA0195 OS=Homo sapiens GN=KIAA0195 PE=1 SV=1                                   | Q12767        |                | 1          |         |
| Alpha-actinin-1 OS=Homo sapiens GN=ACTN1 PE=1 SV=2                                                       | P12814        |                |            | 1       |
| Brefeldin A-inhibited guanine nucleotide-exchange protein 3 OS=Homo sapiens GN=ARFGEF3 PE=1 SV=3         | Q5TH69        |                |            | 1       |
| Aminoglycoside phosphotransferase domain-containing protein 1 OS=Homo sapiens GN=AGPHD1 PE=2 SV=2        | A2RU49        |                | 1          |         |
| Aminoacyl tRNA synthase complex-interacting multifunctional protein 1 OS=Homo sapiens GN=AIMP1 PE=1 SV=2 | Q12904        |                |            | 1       |
| Uncharacterized protein C14orf79 OS=Homo sapiens GN=C14orf79 PE=2 SV=2                                   | Q96F83        |                | 1          |         |
| Alsin OS=Homo sapiens GN=ALS2 PE=1 SV=2                                                                  | Q96Q42        |                |            | 1       |
| Alpha-soluble NSF attachment protein OS=Homo sapiens GN=NAPA PE=1 SV=3                                   | P54920        |                |            | 1       |
| Alpha-protein kinase 3 OS=Homo sapiens GN=ALPK3 PE=2 SV=2                                                | Q96L96        |                |            | 1       |
| Alpha-parvin OS=Homo sapiens GN=PARVA PE=1 SV=1                                                          | Q9NVD7        |                |            | 1       |
| Alpha-methyl-acyl-CoA racemase OS=Homo sapiens                                                           | Q3KT79        |                | 1          |         |
| Adenylyl cyclase-associated protein 2 OS=Homo sapiens GN=CAP2 PE=1 SV=1                                  | P40123        |                |            | 1       |

| Protein peptides                                                                                          | Accession No. | icPTPRD-D1521A | icPTPRD-WT | Control |
|-----------------------------------------------------------------------------------------------------------|---------------|----------------|------------|---------|
| Alpha-adducin OS=Homo sapiens GN=ADD1 PE=1 SV=2                                                           | P35611        |                |            | 1       |
| Uncharacterized protein OS=Homo sapiens GN=UBE2D3                                                         | D6RGD0        |                |            | 1       |
| Alpha-1,3-mannosyl-glycoprotein 2-beta-N-acetylglucosaminyltransferase OS=Homo sapiens GN=MGAT1 PE=2 SV=2 | P26572        |                |            | 1       |
| Alpha-(1,3)-fucosyltransferase OS=Homo sapiens GN=FUT4 PE=1 SV=3                                          | P22083        |                | 1          |         |
| All-trans-retinol 13,14-reductase OS=Homo sapiens GN=RETSAT PE=2 SV=2                                     | Q6NUM9        |                |            | 1       |
| Uncharacterized protein C1orf103 OS=Homo sapiens GN=C1orf103 PE=1 SV=1                                    | Q5T3J3        |                |            | 1       |
| Alcohol dehydrogenase class 4 mu/sigma chain OS=Homo sapiens GN=ADH7 PE=1 SV=2                            | P40394        |                | 1          |         |
| Uncharacterized protein C1orf141 OS=Homo sapiens GN=C1orf141 PE=2 SV=1                                    | Q5JVX7        |                |            | 1       |
| A-kinase anchor protein 7 isoform gamma OS=Homo sapiens GN=AKAP7 PE=2 SV=1                                | Q9P0M2        |                |            | 1       |
| A-kinase anchor protein 6 OS=Homo sapiens GN=AKAP6 PE=1 SV=3                                              | Q13023        |                |            | 1       |
| A-kinase anchor protein 11 OS=Homo sapiens GN=AKAP11 PE=1 SV=1                                            | Q9UKA4        |                |            | 1       |
| Uncharacterized protein C18orf25 OS=Homo sapiens GN=C18orf25 PE=1 SV=2                                    | Q96B23        |                | 1          |         |
| Zinc finger protein 780B OS=Homo sapiens GN=ZNF780B PE=2 SV=1                                             | Q9Y6R6        |                | 1          |         |
| 60S ribosomal protein L30 OS=Homo sapiens GN=RPL30 PE=1 SV=2                                              | P62888        |                | 1          | 1       |
| Zinc finger protein 185 OS=Homo sapiens GN=ZNF185 PE=1 SV=3                                               | O15231        |                | 1          |         |
| Zinc finger protein 2 OS=Homo sapiens GN=ZNF2 PE=2 SV=3                                                   | Q9BSG1        |                |            | 1       |
| Zinc finger protein 311 OS=Homo sapiens GN=ZNF311 PE=1 SV=2                                               | Q5JNZ3        |                |            | 1       |
| 2-oxoisovalerate dehydrogenase subunit alpha, mitochondrial OS=Homo sapiens GN=BCKDHA PE=1 SV=2           | P12694        |                | 1          |         |
| Zinc finger protein 404 OS=Homo sapiens GN=ZNF404 PE=2 SV=1                                               | Q494X3        |                | 1          |         |

| Protein peptides                                                                                                                        | Accession No. | icPTPRD-D1521A | icPTPRD-WT | Control |
|-----------------------------------------------------------------------------------------------------------------------------------------|---------------|----------------|------------|---------|
| 28S ribosomal protein S27, mitochondrial OS=Homo sapiens GN=MRPS27 PE=1 SV=3                                                            | Q92552        |                | 1          |         |
| Zinc finger protein 451 OS=Homo sapiens GN=ZNF451 PE=2 SV=2                                                                             | Q9Y4E5        |                |            | 1       |
| Zinc finger protein 521 (Early hematopoietic zinc finger protein) (LYST-interacting protein LIP3). (Fragment) OS=Homo sapiens GN=ZNF521 | Q8IYZ2        |                |            | 1       |
| Zinc finger matrin-type protein 4 OS=Homo sapiens GN=ZMAT4 PE=2 SV=1                                                                    | Q9H898        |                | 1          |         |
| Zinc finger protein 556 OS=Homo sapiens GN=ZNF556 PE=2 SV=1                                                                             | Q9HAH1        |                |            | 1       |
| Zinc finger CCHC-type and RNA-binding motif-containing protein 1 OS=Homo sapiens GN=ZCRB1 PE=1 SV=2                                     | Q8TBF4        |                |            | 1       |
| Zinc finger protein 92 homolog OS=Homo sapiens GN=ZFP92 PE=2 SV=3                                                                       | A6NM28        |                | 1          |         |
| Zinc finger protein Rlf OS=Homo sapiens GN=RLF PE=1 SV=2                                                                                | Q13129        |                | 1          |         |
| Zinc finger protein with KRAB and SCAN domains 5 OS=Homo sapiens GN=ZKSCAN5 PE=1 SV=1                                                   | Q9Y2L8        |                | 1          |         |
| 26S protease regulatory subunit 10B OS=Homo sapiens GN=PSMC6 PE=1 SV=1                                                                  | P62333        |                |            | 1       |
| 14-3-3 protein zeta/delta OS=Homo sapiens GN=YWHAZ PE=1 SV=1                                                                            | P63104        |                |            | 4       |
| Zinc finger protein ZFPM2 OS=Homo sapiens GN=ZFPM2 PE=1 SV=3                                                                            | Q8WW38        |                | 1          |         |
| Zinc-binding alcohol dehydrogenase domain-containing protein 2 OS=Homo sapiens GN=ZADH2 PE=1 SV=1                                       | Q8N4Q0        |                |            | 1       |
| 14-3-3 protein epsilon OS=Homo sapiens GN=YWHAE PE=1 SV=1                                                                               | P62258        |                | 1          | 4       |
| Zona pellucida-binding protein 1 OS=Homo sapiens GN=ZBPB PE=2 SV=1                                                                      | Q9BS86        |                | 1          |         |
| 26S proteasome non-ATPase regulatory subunit 12 OS=Homo sapiens GN=PSMD12 PE=1 SV=3                                                     | O00232        |                |            | 2       |
| WD repeat and FYVE domain-containing protein 3 OS=Homo sapiens GN=WDFY3 PE=1 SV=2                                                       | Q8IZQ1        |                | 1          | 1       |
| UPF0027 protein C22orf28 OS=Homo sapiens GN=C22orf28 PE=1 SV=1                                                                          | Q9Y3I0        |                |            | 1       |
| UPF0585 protein C16orf13 OS=Homo sapiens GN=C16orf13 PE=1 SV=2                                                                          | Q96S19        |                |            | 2       |

| Protein peptides                                                                               | Accession No. | icPTPRD-D1521A | icPTPRD-WT | Control |
|------------------------------------------------------------------------------------------------|---------------|----------------|------------|---------|
| V(D)J recombination-activating protein 1 OS=Homo sapiens GN=RAG1 PE=1 SV=2                     | P15918        |                |            | 1       |
| 60S ribosomal protein L19 OS=Homo sapiens GN=RPL19 PE=1 SV=1                                   | P84098        |                | 1          |         |
| V4-6 protein (Fragment) OS=Homo sapiens GN=IGLV11-55                                           | Q5NV87        |                | 1          |         |
| Vacuolar protein sorting-associated protein 11 homolog OS=Homo sapiens GN=VPS11 PE=1 SV=1      | Q9H270        |                |            | 1       |
| Vacuolar protein sorting-associated protein 53 homolog OS=Homo sapiens GN=VPS53 PE=1 SV=1      | Q5VIR6        |                | 1          |         |
| Voltage-gated potassium channel subunit beta-1 OS=Homo sapiens GN=KCNAB1 PE=2 SV=1             | Q14722        |                | 1          |         |
| von Willebrand factor A domain-containing protein 1 OS=Homo sapiens GN=VWA1 PE=2 SV=1          | Q6PCB0        |                |            | 1       |
| Zinc finger protein 167 OS=Homo sapiens GN=ZNF167 PE=2 SV=2                                    | Q9P0L1        |                |            | 1       |
| V-type proton ATPase subunit G 1 OS=Homo sapiens GN=ATP6V1G1 PE=1 SV=3                         | O75348        |                |            | 1       |
| Amyloid beta A4 precursor protein-binding family A member 2 OS=Homo sapiens GN=APBA2 PE=1 SV=3 | Q99767        |                |            | 1       |
| WD repeat-containing protein 16 OS=Homo sapiens GN=WDR16 PE=1 SV=3                             | Q8N1V2        |                | 1          |         |
| 5'-AMP-activated protein kinase subunit gamma-3 OS=Homo sapiens GN=PRKAG3 PE=2 SV=3            | Q9UGI9        |                |            | 2       |
| WD repeat-containing protein 70 OS=Homo sapiens GN=WDR70 PE=1 SV=1                             | Q9NW82        |                | 1          |         |
| WD repeat-containing protein C10orf79 OS=Homo sapiens GN=C10orf79 PE=2 SV=3                    | Q8NDM7        |                |            | 1       |
| WD repeat-containing protein C2orf86 OS=Homo sapiens GN=C2orf86 PE=1 SV=2                      | O95876        |                |            | 1       |
| 40S ribosomal protein S6 OS=Homo sapiens GN=RPS6 PE=1 SV=1                                     | P62753        |                |            | 1       |
| Xin actin-binding repeat-containing protein 1 OS=Homo sapiens GN=XIRP1 PE=1 SV=1               | Q702N8        |                |            | 1       |
| Zinc finger CCCH domain-containing protein 11A OS=Homo sapiens GN=ZC3H11A PE=1 SV=3            | O75152        |                | 1          |         |
| Zinc finger CCCH-type antiviral protein 1 OS=Homo sapiens GN=ZC3HAV1 PE=1 SV=3                 | Q7Z2W4        |                | 1          |         |

| Protein peptides                                                                                      | Accession No. | icPTPRD-D1521A | icPTPRD-WT | Control |
|-------------------------------------------------------------------------------------------------------|---------------|----------------|------------|---------|
| von Willebrand factor C and EGF domain-containing protein OS=Homo sapiens GN=VWCE PE=2 SV=2           | Q96DN2        |                |            | 1       |
| BTB/POZ domain-containing protein KCTD3 OS=Homo sapiens GN=KCTD3 PE=1 SV=2                            | Q9Y597        |                | 1          |         |
| Breakpoint cluster region protein OS=Homo sapiens GN=BCR PE=1 SV=2                                    | P11274        |                | 1          | 1       |
| Cadherin-4 OS=Homo sapiens GN=CDH4 PE=2 SV=2                                                          | P55283        |                | 1          |         |
| Cadherin-17 OS=Homo sapiens GN=CDH17 PE=1 SV=3                                                        | Q12864        |                | 1          |         |
| Tubulin alpha-1C chain OS=Homo sapiens GN=TUBA1C PE=1 SV=1                                            | Q9BQE3        |                |            | 2       |
| Tubulin beta-3 chain OS=Homo sapiens GN=TUBB3 PE=1 SV=2                                               | Q13509        |                | 3          | 3       |
| C5a anaphylatoxin chemotactic receptor OS=Homo sapiens GN=C5AR1 PE=1 SV=2                             | P21730        |                |            | 1       |
| C3 and PZP-like alpha-2-macroglobulin domain-containing protein 8 OS=Homo sapiens GN=CPAMD8 PE=1 SV=2 | Q8IZJ3        |                |            | 1       |
| Tubulin beta-4 chain OS=Homo sapiens GN=TUBB4 PE=1 SV=2                                               | P04350        |                |            | 2       |
| C2 domain-containing protein 3 OS=Homo sapiens GN=C2CD3 PE=1 SV=4                                     | Q4AC94        |                | 1          |         |
| Calbindin OS=Homo sapiens GN=CALB1 PE=1 SV=2                                                          | P05937        |                | 1          | 1       |
| Tubulin beta-8 chain OS=Homo sapiens GN=TUBB8 PE=1 SV=2                                               | Q3ZCM7        |                |            | 1       |
| Calcium-activated potassium channel subunit alpha-1 OS=Homo sapiens GN=KCNMA1 PE=1 SV=2               | Q12791        |                |            | 1       |
| BTB/POZ domain-containing protein KCTD18 OS=Homo sapiens GN=KCTD18 PE=2 SV=2                          | Q6PI47        |                | 1          |         |
| BTB/POZ domain-containing protein KCTD11 OS=Homo sapiens GN=KCTD11 PE=1 SV=1                          | Q693B1        |                | 1          |         |
| Tubulin polyglutamylase TTLL7 OS=Homo sapiens GN=TTLL7 PE=2 SV=2                                      | Q6ZT98        |                |            | 1       |
| Tubulin tyrosine ligase-like family, member 11 OS=Homo sapiens GN=TTLL11                              | B1AP70        |                |            | 1       |
| Bromodomain containing 2 (Fragment) OS=Homo sapiens GN=BRD2                                           | B0V072        |                |            | 2       |

| Protein peptides                                                                     | Accession No. | icPTPRD-D1521A | icPTPRD-WT | Control |
|--------------------------------------------------------------------------------------|---------------|----------------|------------|---------|
| Bromodomain and WD repeat-containing protein 1 OS=Homo sapiens GN=BRWD1 PE=1 SV=4    | Q9NSI6        |                |            | 1       |
| Cytoplasmic tRNA 2-thiolation protein 1 OS=Homo sapiens GN=CTU1 PE=1 SV=1            | Q7Z7A3        |                |            | 1       |
| Tyrosine-protein kinase BAZ1B OS=Homo sapiens GN=BAZ1B PE=1 SV=2                     | Q9UIG0        |                |            | 1       |
| Ammonium transporter Rh type B OS=Homo sapiens GN=RHBG PE=1 SV=2                     | Q9H310        |                |            | 1       |
| C2 domain-containing protein 2-like OS=Homo sapiens GN=C2CD2L PE=1 SV=3              | O14523        |                |            | 1       |
| CAP-Gly domain-containing linker protein 2 OS=Homo sapiens GN=CLIP2 PE=1 SV=1        | Q9UDT6        |                | 1          |         |
| CB1 cannabinoid receptor-interacting protein 1 OS=Homo sapiens GN=CNRIP1 PE=1 SV=1   | Q96F85        |                |            | 1       |
| Cathepsin D OS=Homo sapiens GN=CTSD PE=1 SV=1                                        | P07339        |                |            | 2       |
| Catechol O-methyltransferase OS=Homo sapiens GN=COMT PE=1 SV=2                       | P21964        |                |            | 1       |
| Transmembrane and TPR repeat-containing protein 3 OS=Homo sapiens GN=TMTC3 PE=1 SV=2 | Q6ZXV5        |                |            | 1       |
| Transmembrane channel-like 3 OS=Homo sapiens GN=TMC3                                 | A2RTY2        |                |            | 1       |
| Transmembrane protein 126A OS=Homo sapiens GN=TMEM126A PE=1 SV=1                     | Q9H061        |                |            | 1       |
| Caskin-1 OS=Homo sapiens GN=CASKIN1 PE=1 SV=1                                        | Q8WXD9        |                |            | 1       |
| Carboxypeptidase D OS=Homo sapiens GN=CPD PE=1 SV=2                                  | O75976        |                | 1          |         |
| Transmembrane protein 200A OS=Homo sapiens GN=TMEM200A PE=2 SV=1                     | Q86VY9        |                | 1          |         |
| Tropomyosin alpha-1 chain OS=Homo sapiens GN=TPM1 PE=1 SV=2                          | P09493        |                |            | 1       |
| CAP-Gly domain-containing linker protein 4 OS=Homo sapiens GN=CLIP4 PE=1 SV=1        | Q8N3C7        |                |            | 1       |
| BRCA1-A complex subunit MERIT40 OS=Homo sapiens GN=MERIT40 PE=1 SV=1                 | Q9NWW8        |                | 1          |         |
| Transmembrane protein C2orf18 OS=Homo sapiens GN=C2orf18 PE=1 SV=1                   | Q8N357        |                |            | 2       |

| Protein peptides                                                                                              | Accession No. | icPTPRD-D1521A | icPTPRD-WT | Control |
|---------------------------------------------------------------------------------------------------------------|---------------|----------------|------------|---------|
| cAMP-specific 3',5'-cyclic phosphodiesterase 4B OS=Homo sapiens GN=PDE4B PE=1 SV=1                            | Q07343        |                |            | 2       |
| Transmembrane protein ENSP00000382582 OS=Homo sapiens PE=4 SV=2                                               | A8MUB7        |                |            | 1       |
| Transportin-1 OS=Homo sapiens GN=TNPO1 PE=1 SV=2                                                              | Q92973        |                |            | 1       |
| Calponin-2 OS=Homo sapiens GN=CNN2 PE=1 SV=4                                                                  | Q99439        |                |            | 1       |
| Calpain-7 OS=Homo sapiens GN=CAPN7 PE=1 SV=1                                                                  | Q9Y6W3        |                |            | 1       |
| Tripeptidyl-peptidase 2 OS=Homo sapiens GN=TPP2 PE=1 SV=4                                                     | P29144        |                | 1          |         |
| Calmodulin-regulated spectrin-associated protein 1 OS=Homo sapiens GN=CAMSAP1 PE=1 SV=2                       | Q5T5Y3        |                |            | 2       |
| Calcium-transporting ATPase type 2C member 2 OS=Homo sapiens GN=ATP2C2 PE=1 SV=2                              | O75185        |                | 1          |         |
| Caprin-2 OS=Homo sapiens GN=CAPRIN2 PE=1 SV=1                                                                 | Q6IMN6        |                |            | 1       |
| Ankyrin repeat domain-containing protein 62 OS=Homo sapiens GN=ANKRD62 PE=2 SV=4                              | A6NC57        |                | 1          | 1       |
| EF-hand calcium-binding domain-containing protein 1 OS=Homo sapiens GN=EFCAB1 PE=2 SV=1                       | Q9HAE3        |                |            | 1       |
| Arginyl-tRNA synthetase, cytoplasmic OS=Homo sapiens GN=RARS PE=1 SV=2                                        | P54136        |                | 2          | 2       |
| Arf-GAP with Rho-GAP domain, ANK repeat and PH domain-containing protein 2 OS=Homo sapiens GN=ARAP2 PE=1 SV=3 | Q8WZ64        |                |            | 1       |
| Uncharacterized protein C10orf46 OS=Homo sapiens GN=C10orf46 PE=2 SV=1                                        | Q86Y37        |                |            | 1       |
| Apoptosis regulator BAX OS=Homo sapiens GN=BAX PE=1 SV=1                                                      | Q07812        |                |            | 3       |
| Apolipoprotein C-IV OS=Homo sapiens GN=APOC4 PE=1 SV=1                                                        | P55056        |                |            | 1       |
| Apolipoprotein B-100 OS=Homo sapiens GN=APOB PE=1 SV=2                                                        | P04114        |                |            | 1       |
| AP-4 complex subunit epsilon-1 OS=Homo sapiens GN=AP4E1 PE=1 SV=2                                             | Q9UPM8        |                |            | 1       |
| Anti-folate binding protein (Fragment) OS=Homo sapiens GN=HuVH8B VH                                           | A2NYQ9        |                | 1          |         |

| Protein peptides                                                                                        | Accession No. | icPTPRD-D1521A | icPTPRD-WT | Control |
|---------------------------------------------------------------------------------------------------------|---------------|----------------|------------|---------|
| Unc-84 homolog B (C. elegans) OS=Homo sapiens GN=UNC84B                                                 | B0QY62        |                |            | 1       |
| Uncharacterized protein C11orf47 OS=Homo sapiens GN=C11orf47 PE=2 SV=1                                  | Q2NKK8        |                |            | 1       |
| Armadillo repeat-containing protein 8 OS=Homo sapiens GN=ARMC8 PE=1 SV=2                                | Q8IUR7        |                |            | 1       |
| Ankyrin repeat domain-containing protein 45 OS=Homo sapiens GN=ANKRD45 PE=2 SV=1                        | Q5TZF3        |                | 1          |         |
| Ankyrin repeat domain-containing protein 11 OS=Homo sapiens GN=ANKRD11 PE=1 SV=3                        | Q6UB99        |                | 1          |         |
| Ankyrin repeat and SAM domain-containing protein 1A OS=Homo sapiens GN=ANKS1A PE=1 SV=4                 | Q92625        |                |            | 1       |
| Uncharacterized protein C11orf65 OS=Homo sapiens GN=C11orf65 PE=2 SV=1                                  | Q8NCR3        |                |            | 1       |
| Ankyrin repeat and fibronectin type-III domain-containing protein 1 OS=Homo sapiens GN=ANKFN1 PE=2 SV=2 | Q8N957        |                | 1          |         |
| Angiotensin-converting enzyme 2 OS=Homo sapiens GN=ACE2 PE=1 SV=2                                       | Q9BYF1        |                | 1          |         |
| Uncharacterized protein C12orf34 OS=Homo sapiens GN=C12orf34 PE=2 SV=1                                  | Q5U5X8        |                |            | 1       |
| AN1-type zinc finger and ubiquitin domain-containing protein 1 OS=Homo sapiens GN=ANUBL1 PE=2 SV=2      | Q86XD8        |                |            | 1       |
| Uncharacterized protein C12orf76 OS=Homo sapiens GN=C12orf76 PE=2 SV=1                                  | Q8N812        |                | 1          |         |
| Annexin A2 OS=Homo sapiens GN=ANXA2 PE=1 SV=2                                                           | P07355        |                |            | 1       |
| ATP-dependent RNA helicase DHX8 OS=Homo sapiens GN=DHX8 PE=1 SV=1                                       | Q14562        |                | 1          |         |
| Brain protein 16-like OS=Homo sapiens GN=BRP16L PE=3 SV=1                                               | P0CB43        |                | 1          |         |
| Tyrosine-protein kinase HCK OS=Homo sapiens GN=HCK PE=1 SV=5                                            | P08631        |                |            | 1       |
| Tyrosine-protein kinase JAK3 OS=Homo sapiens GN=JAK3 PE=1 SV=2                                          | P52333        |                |            | 1       |
| Tyrosine-protein phosphatase non-receptor type 9 OS=Homo sapiens GN=PTPN9 PE=1 SV=1                     | P43378        |                |            | 1       |
| Bestrophin variant (Fragment) OS=Homo sapiens                                                           | Q59FK9        |                | 1          |         |



| Protein peptides                                                                                   | Accession No. | icPTPRD-D1521A | icPTPRD-WT | Control |
|----------------------------------------------------------------------------------------------------|---------------|----------------|------------|---------|
| U5 small nuclear ribonucleoprotein 40 kDa protein OS=Homo sapiens GN=SNRNP40 PE=1 SV=1             | Q96DI7        |                | 1          |         |
| Basic helix-loop-helix domain-containing protein KIAA2018 OS=Homo sapiens GN=KIAA2018 PE=1 SV=3    | Q68DE3        |                | 1          |         |
| BAH and coiled-coil domain-containing protein 1 OS=Homo sapiens GN=BAHCC1 PE=1 SV=3                | Q9P281        |                | 1          |         |
| Baculoviral IAP repeat-containing protein 6 OS=Homo sapiens GN=BIRC6 PE=1 SV=2                     | Q9NR09        |                | 2          | 1       |
| Armadillo repeat protein deleted in velo-cardio-facial syndrome OS=Homo sapiens GN=ARVCF PE=1 SV=1 | O00192        |                |            | 1       |
| Ubiquitin carboxyl-terminal hydrolase 4 OS=Homo sapiens GN=USP4 PE=1 SV=3                          | Q13107        |                | 1          |         |
| Translin OS=Homo sapiens GN=TSN PE=1 SV=1                                                          | Q15631        |                |            | 1       |
| ATP-dependent RNA helicase DDX39 OS=Homo sapiens GN=DDX39 PE=1 SV=2                                | O00148        |                |            | 1       |
| Ubiquitin carboxyl-terminal hydrolase 8 OS=Homo sapiens GN=USP8 PE=1 SV=1                          | P40818        |                |            | 2       |
| Ubiquitin-conjugating enzyme E2 K OS=Homo sapiens GN=UBE2K PE=1 SV=3                               | P61086        |                |            | 1       |
| Ubiquitin-like-conjugating enzyme ATG3 OS=Homo sapiens GN=ATG3 PE=1 SV=1                           | Q9NT62        |                |            | 1       |
| Ubiquitin-protein ligase E3A OS=Homo sapiens GN=UBE3A PE=1 SV=4                                    | Q05086        |                |            | 1       |
| UDP-glucose:glycoprotein glucosyltransferase 1 OS=Homo sapiens GN=UGGT1 PE=1 SV=3                  | Q9NYU2        |                |            | 1       |
| ATP synthase subunit alpha, mitochondrial OS=Homo sapiens GN=ATP5A1 PE=1 SV=1                      | P25705        |                |            | 1       |
| UDP-glucuronosyltransferase 1A3 (Fragment) OS=Homo sapiens GN=UGT1A3                               | A9UKD1        |                |            | 1       |
| Arylsulfatase G OS=Homo sapiens GN=ARSG PE=1 SV=1                                                  | Q96EG1        |                |            | 1       |
| Ubiquitin carboxyl-terminal hydrolase 15 OS=Homo sapiens GN=USP15 PE=1 SV=3                        | Q9Y4E8        |                | 2          | 1       |
| LOC441239 protein OS=Homo sapiens GN=LOC441239                                                     | Q6P462        |                |            | 1       |
| Leucine-rich repeat-containing protein 16A OS=Homo sapiens GN=LRR16A PE=1 SV=1                     | Q5VZK9        |                | 1          |         |

| Protein peptides                                                                                                                            | Accession No. | icPTPRD-D1521A | icPTPRD-WT | Control |
|---------------------------------------------------------------------------------------------------------------------------------------------|---------------|----------------|------------|---------|
| Lysine-specific histone demethylase 1A OS=Homo sapiens GN=KDM1A PE=1 SV=2                                                                   | O60341        |                | 1          |         |
| Protein TANC2 OS=Homo sapiens GN=TANC2 PE=1 SV=3                                                                                            | Q9HCD6        |                |            | 1       |
| Lysine-specific demethylase 3B OS=Homo sapiens GN=KDM3B PE=1 SV=2                                                                           | Q7LBC6        |                |            | 1       |
| Lymphotoxin-alpha OS=Homo sapiens GN=LTA PE=1 SV=2                                                                                          | P01374        |                |            | 1       |
| Lymphocyte antigen 75 OS=Homo sapiens GN=LY75 PE=1 SV=2                                                                                     | O60449        |                |            | 1       |
| Lupus La protein OS=Homo sapiens GN=SSB PE=1 SV=2                                                                                           | P05455        |                | 1          |         |
| Protein tyrosine phosphatase type IVA 2 OS=Homo sapiens GN=PTP4A2 PE=1 SV=1                                                                 | Q12974        |                | 1          |         |
| Low affinity immunoglobulin epsilon Fc receptor OS=Homo sapiens GN=FCER2 PE=1 SV=1                                                          | P06734        |                |            | 1       |
| Macrophage-capping protein OS=Homo sapiens GN=CAPG PE=1 SV=2                                                                                | P40121        |                |            | 13      |
| Protein Wnt-3a OS=Homo sapiens GN=WNT3A PE=1 SV=2                                                                                           | P56704        |                |            | 1       |
| Major vault protein OS=Homo sapiens GN=MVP PE=1 SV=4                                                                                        | Q14764        |                |            | 1       |
| L-lactate dehydrogenase A chain OS=Homo sapiens GN=LDHA PE=1 SV=2                                                                           | P00338        |                | 1          | 1       |
| Protein Wnt-4 OS=Homo sapiens GN=WNT4 PE=1 SV=4                                                                                             | P56705        |                |            | 1       |
| Protein-glutamine gamma-glutamyltransferase 4 OS=Homo sapiens GN=TGM4 PE=1 SV=2                                                             | P49221        |                |            | 1       |
| Lipoamide acyltransferase component of branched-chain alpha-keto acid dehydrogenase complex, mitochondrial OS=Homo sapiens GN=DBT PE=1 SV=3 | P11182        |                |            | 1       |
| Leukocyte immunoglobulin-like receptor subfamily B member 4 OS=Homo sapiens GN=LILRB4 PE=1 SV=2                                             | Q8NHJ6        |                | 1          |         |
| Leucyl-tRNA synthetase, cytoplasmic OS=Homo sapiens GN=LARS PE=1 SV=2                                                                       | Q9P2J5        |                | 1          | 1       |
| Protocadherin Fat 1 OS=Homo sapiens GN=FAT1 PE=1 SV=1                                                                                       | Q14517        |                |            | 1       |
| Leucine-rich repeat-containing protein 7 OS=Homo sapiens GN=LRR7 PE=1 SV=1                                                                  | Q96NW7        |                | 1          |         |

| Protein peptides                                                              | Accession No. | icPTPRD-D1521A | icPTPRD-WT | Control |
|-------------------------------------------------------------------------------|---------------|----------------|------------|---------|
| Leucine-rich repeat-containing protein 41 OS=Homo sapiens GN=LRRC41 PE=1 SV=3 | Q15345        |                | 1          |         |
| Ran-binding protein 10 OS=Homo sapiens GN=RANBP10 PE=1 SV=1                   | Q6VN20        |                |            | 2       |
| Lon protease homolog, mitochondrial OS=Homo sapiens GN=LONP1 PE=1 SV=2        | P36776        |                |            | 1       |
| Protein pellino homolog 2 OS=Homo sapiens GN=PELI2 PE=1 SV=1                  | Q9HAT8        |                |            | 1       |
| Protein fat-free homolog OS=Homo sapiens GN=FFR PE=1 SV=2                     | Q9UID3        |                |            | 1       |
| MORN repeat-containing protein 4 OS=Homo sapiens GN=MORN4 PE=2 SV=1           | Q8NDC4        |                |            | 1       |
| MORC family CW-type zinc finger protein 4 OS=Homo sapiens GN=MORC4 PE=1 SV=2  | Q8TE76        |                | 1          |         |
| Protein IWS1 homolog OS=Homo sapiens GN=IWS1 PE=1 SV=2                        | Q96ST2        |                | 1          |         |
| Protein kinase C eta type OS=Homo sapiens GN=PRKCH PE=1 SV=4                  | P24723        |                | 1          |         |
| Protein kinase C gamma type OS=Homo sapiens GN=PRKCG PE=1 SV=3                | P05129        |                | 4          | 2       |
| Protein kinase C-binding protein NELL2 OS=Homo sapiens GN=NELL2 PE=1 SV=1     | Q99435        |                | 1          |         |
| Protein lunapark OS=Homo sapiens GN=LNP PE=1 SV=2                             | Q9C0E8        |                | 1          |         |
| Midline-1 OS=Homo sapiens GN=MID1 PE=1 SV=1                                   | O15344        |                | 2          |         |
| Lysosomal-trafficking regulator OS=Homo sapiens GN=LYST PE=1 SV=3             | Q99698        |                | 1          |         |
| Protein NOXP20 OS=Homo sapiens GN=FAM114A1 PE=1 SV=2                          | Q8IWE2        |                |            | 2       |
| Protocadherin-23 OS=Homo sapiens GN=DCHS2 PE=2 SV=1                           | Q6V1P9        |                |            | 1       |
| Methylcytosine dioxygenase TET1 OS=Homo sapiens GN=TET1 PE=1 SV=2             | Q8NFU7        |                |            | 1       |
| Methionyl-tRNA synthetase, cytoplasmic OS=Homo sapiens GN=MARS PE=1 SV=2      | P56192        |                | 2          |         |
| Metalloproteinase 12-like protein OS=Homo sapiens                             | Q2VYF6        |                |            | 1       |

| Protein peptides                                                                                      | Accession No. | icPTPRD-D1521A | icPTPRD-WT | Control |
|-------------------------------------------------------------------------------------------------------|---------------|----------------|------------|---------|
| Metal transporter CNNM4 OS=Homo sapiens GN=CNNM4 PE=1 SV=3                                            | Q6P4Q7        |                |            | 1       |
| Membrane-associated phosphatidylinositol transfer protein 3 OS=Homo sapiens GN=PITPNM3 PE=1 SV=2      | Q9BZ71        |                | 1          |         |
| Melanoma-associated antigen D2 OS=Homo sapiens GN=MAGED2 PE=1 SV=2                                    | Q9UNF1        |                |            | 1       |
| Melanoma ubiquitous mutated protein (Fragment) OS=Homo sapiens GN=MUM-1                               | Q13110        |                | 1          |         |
| Mastermind-like protein 2 OS=Homo sapiens GN=MAML2 PE=1 SV=2                                          | Q8IZL2        |                |            | 2       |
| Protein PROCA1 OS=Homo sapiens GN=PROCA1 PE=2 SV=2                                                    | Q8NCQ7        |                | 1          |         |
| Mannose 6-phosphate/insulin-like growth factor-II receptor (Fragment) OS=Homo sapiens                 | Q13661        |                |            | 1       |
| Microsomal glutathione S-transferase 1 OS=Homo sapiens GN=MGST1 PE=1 SV=1                             | P10620        |                |            | 1       |
| Integral membrane protein 2A OS=Homo sapiens GN=ITM2A PE=1 SV=2                                       | O43736        |                | 1          |         |
| Leucine-rich repeat-containing protein 39 OS=Homo sapiens GN=LRRC39 PE=2 SV=1                         | Q96DD0        |                | 1          |         |
| Intraflagellar transport protein 80 homolog OS=Homo sapiens GN=IFT80 PE=1 SV=3                        | Q9P2H3        |                |            | 1       |
| Putative protein FAM90A2 OS=Homo sapiens GN=FAM90A2P PE=5 SV=2                                        | Q658T7        |                | 1          | 1       |
| Interleukin-22 receptor subunit alpha-1 OS=Homo sapiens GN=IL22RA1 PE=1 SV=1                          | Q8N6P7        |                |            | 1       |
| Interleukin-1 receptor-associated kinase 4 OS=Homo sapiens GN=IRAK4 PE=1 SV=1                         | Q9NWZ3        |                |            | 1       |
| Interleukin enhancer-binding factor 3 OS=Homo sapiens GN=ILF3 PE=1 SV=3                               | Q12906        |                | 2          |         |
| Interleukin 1 receptor accessory protein variant AcPb OS=Homo sapiens GN=IL1RAP                       | B1NLD0        |                | 1          |         |
| Interferon-induced, double-stranded RNA-activated protein kinase OS=Homo sapiens GN=EIF2AK2 PE=1 SV=2 | P19525        |                |            | 1       |
| Putative RNA exonuclease NEF-sp OS=Homo sapiens GN=44M2.3 PE=2 SV=1                                   | Q96IC2        |                | 1          |         |
| IQ and AAA domain-containing protein 1 OS=Homo sapiens GN=IQCA1 PE=2 SV=1                             | Q86XH1        |                |            | 1       |

| Protein peptides                                                                                         | Accession No. | icPTPRD-D1521A | icPTPRD-WT | Control |
|----------------------------------------------------------------------------------------------------------|---------------|----------------|------------|---------|
| Putative uncharacterized protein BCR (Fragment) OS=Homo sapiens GN=BCR                                   | Q12845        |                |            | 1       |
| Putative myosin light chain kinase 3 OS=Homo sapiens GN=MYLK3 PE=2 SV=3                                  | Q32MK0        |                | 1          |         |
| Putative uncharacterized protein C12orf77 OS=Homo sapiens GN=C12orf77 PE=2 SV=1                          | C9JDV5        |                |            | 1       |
| Putative uncharacterized protein DKFZp686E2459 OS=Homo sapiens GN=DKFZp686E2459                          | Q7Z3D7        |                | 1          |         |
| Inosine-5'-monophosphate dehydrogenase 2 OS=Homo sapiens GN=IMPDH2 PE=1 SV=2                             | P12268        |                |            | 1       |
| Inner centromere protein OS=Homo sapiens GN=INCENP PE=1 SV=3                                             | Q9NQS7        |                |            | 1       |
| Putative uncharacterized protein FLJ36116 OS=Homo sapiens PE=2 SV=1                                      | Q8N9X3        |                |            | 1       |
| Putative zinc finger and BTB domain-containing protein 12-like protein OS=Homo sapiens PE=5 SV=4         | A6NH08        |                |            | 1       |
| Pyridoxal phosphate phosphatase PHOSPHO2 OS=Homo sapiens GN=PHOSPHO2 PE=1 SV=1                           | Q8TCD6        |                |            | 1       |
| Importin-7 OS=Homo sapiens GN=IPO7 PE=1 SV=1                                                             | O95373        |                |            | 3       |
| Immunity-related GTPase family Q protein OS=Homo sapiens GN=IRGQ PE=1 SV=1                               | Q8WZA9        |                |            | 1       |
| Slit homolog 3 protein OS=Homo sapiens GN=SLIT3 PE=2 SV=3                                                | O75094        |                | 1          |         |
| Putative serpin A13 OS=Homo sapiens GN=SERPINA13 PE=5 SV=1                                               | Q6UXR4        |                |            | 1       |
| Keratin-associated protein 11-1 OS=Homo sapiens GN=KRTAP11-1 PE=1 SV=1                                   | Q8IUC1        |                |            | 1       |
| Leucine-rich repeat flightless-interacting protein 1 OS=Homo sapiens GN=LRRFIP1 PE=1 SV=2                | Q32MZ4        |                |            | 2       |
| Leucine-rich repeat and calponin homology domain-containing protein 2 OS=Homo sapiens GN=LRCH2 PE=2 SV=2 | Q5VUJ6        |                | 1          | 1       |
| P-selectin OS=Homo sapiens GN=SELP PE=1 SV=3                                                             | P16109        |                |            | 1       |
| Large proline-rich protein BAT2 OS=Homo sapiens GN=BAT2 PE=1 SV=3                                        | P48634        |                | 1          |         |
| La-related protein 1B OS=Homo sapiens GN=LARP1B PE=1 SV=2                                                | Q659C4        |                | 1          |         |

| Protein peptides                                                                                  | Accession No. | icPTPRD-D1521A | icPTPRD-WT | Control |
|---------------------------------------------------------------------------------------------------|---------------|----------------|------------|---------|
| La-related protein 1 OS=Homo sapiens GN=LARP1 PE=1 SV=2                                           | Q6PKG0        |                | 1          |         |
| PTB-containing, cubilin and LRP1-interacting protein OS=Homo sapiens GN=PID1 PE=1 SV=1            | Q7Z2X4        |                |            | 1       |
| Kinesin-like protein KIF23 OS=Homo sapiens GN=KIF23 PE=1 SV=3                                     | Q02241        |                |            | 3       |
| Kinesin-like protein KIF21B OS=Homo sapiens GN=KIF21B PE=1 SV=2                                   | Q75037        |                |            | 1       |
| Putative protein FAM90A12 OS=Homo sapiens GN=FAM90A12 PE=3 SV=1                                   | A8MX19        |                |            | 1       |
| Putative ankyrin repeat domain-containing protein 30B-like OS=Homo sapiens GN=ANKRD30BL PE=2 SV=3 | A7E2S9        |                | 1          |         |
| Multidrug resistance protein 1 OS=Homo sapiens                                                    | B5AK60        |                |            | 1       |
| Putative ATP-dependent RNA helicase DHX57 OS=Homo sapiens GN=DHX57 PE=1 SV=2                      | Q6P158        |                | 1          |         |
| Kelch-like protein 8 OS=Homo sapiens GN=KLHL8 PE=2 SV=4                                           | Q9P2G9        |                |            | 1       |
| Kelch-like protein 31 OS=Homo sapiens GN=KLHL31 PE=2 SV=1                                         | Q9H511        |                | 1          |         |
| Kelch-like protein 29 OS=Homo sapiens GN=KLHL29 PE=2 SV=2                                         | Q96CT2        |                | 1          |         |
| Katanin p60 ATPase-containing subunit A-like 2 OS=Homo sapiens GN=KATNAL2 PE=2 SV=3               | Q8IYT4        |                |            | 1       |
| Putative heat shock protein HSP 90-alpha A2 OS=Homo sapiens GN=HSP90AA2 PE=1 SV=2                 | Q14568        |                | 1          | 1       |
| Putative L-aspartate dehydrogenase OS=Homo sapiens GN=ASPDH PE=2 SV=2                             | A6ND91        |                |            | 1       |
| IST1 homolog OS=Homo sapiens GN=KIAA0174 PE=1 SV=1                                                | P53990        |                |            | 1       |
| Isoleucyl-tRNA synthetase, mitochondrial OS=Homo sapiens GN=IARS2 PE=1 SV=2                       | Q9NSE4        |                |            | 1       |
| Iroquois-class homeodomain protein IRX-6 OS=Homo sapiens GN=IRX6 PE=2 SV=3                        | P78412        |                |            | 1       |
| Kinesin-like protein KIF16B OS=Homo sapiens GN=KIF16B PE=1 SV=2                                   | Q96L93        |                | 1          |         |
| Nucleosome assembly protein 1-like 4 OS=Homo sapiens GN=NAP1L4 PE=1 SV=1                          | Q99733        |                |            | 5       |

| Protein peptides                                                                        | Accession No. | icPTPRD-D1521A | icPTPRD-WT | Control |
|-----------------------------------------------------------------------------------------|---------------|----------------|------------|---------|
| MST148 protein OS=Homo sapiens GN=MST148                                                | Q7Z2R3        |                |            | 1       |
| Oxygen-regulated protein 1 OS=Homo sapiens GN=RP1 PE=1 SV=1                             | P56715        |                |            | 1       |
| PRO0899 OS=Homo sapiens                                                                 | Q9P1L9        |                |            | 1       |
| Probable ATP-dependent RNA helicase DDX28 OS=Homo sapiens GN=DDX28 PE=2 SV=2            | Q9NUL7        |                |            | 1       |
| Olfactory receptor 4N2 OS=Homo sapiens GN=OR4N2 PE=2 SV=1                               | Q8NGD1        |                |            | 1       |
| Olfactory receptor 4C6 OS=Homo sapiens GN=OR4C6 PE=2 SV=1                               | Q8NH72        |                |            | 1       |
| Olfactory receptor 1E1 OS=Homo sapiens GN=OR1E1 PE=2 SV=1                               | P30953        |                |            | 1       |
| Probable ATP-dependent RNA helicase DDX4 OS=Homo sapiens GN=DDX4 PE=2 SV=2              | Q9NQI0        |                |            | 1       |
| Probable ATP-dependent RNA helicase DDX6 OS=Homo sapiens GN=DDX6 PE=1 SV=2              | P26196        |                |            | 1       |
| PAB-dependent poly(A)-specific ribonuclease subunit 2 OS=Homo sapiens GN=PAN2 PE=1 SV=3 | Q504Q3        |                |            | 1       |
| Probable G-protein coupled receptor 156 OS=Homo sapiens GN=GPR156 PE=2 SV=2             | Q8NFN8        |                |            | 1       |
| Pregnancy-specific beta-1-glycoprotein 5 OS=Homo sapiens GN=PSG5 PE=2 SV=3              | Q15238        |                |            | 1       |
| Nucleosome assembly protein 1-like 1 OS=Homo sapiens GN=NAP1L1 PE=1 SV=1                | P55209        |                | 1          | 2       |
| Probable N-acetyltransferase 8B OS=Homo sapiens GN=NAT8B PE=2 SV=1                      | Q9UHF3        |                | 1          |         |
| Nucleolar pre-ribosomal-associated protein 1 OS=Homo sapiens GN=URB1 PE=1 SV=4          | O60287        |                |            | 1       |
| Nuclear RNA export factor 2 OS=Homo sapiens GN=NXF2 PE=1 SV=1                           | Q9GZY0        |                | 2          |         |
| Nuclear receptor subfamily 1 group I member 2 OS=Homo sapiens GN=NR1I2 PE=1 SV=1        | O75469        |                | 1          |         |
| Progesterone receptor OS=Homo sapiens GN=PGR PE=1 SV=4                                  | P06401        |                |            | 1       |
| Prohibitin OS=Homo sapiens GN=PHB PE=1 SV=1                                             | P35232        |                | 1          |         |

| Protein peptides                                                                             | Accession No. | icPTPRD-D1521A | icPTPRD-WT | Control |
|----------------------------------------------------------------------------------------------|---------------|----------------|------------|---------|
| Prolactin-inducible protein OS=Homo sapiens GN=PIP PE=1 SV=1                                 | P12273        |                | 1          |         |
| Proline-rich protein 16 OS=Homo sapiens GN=PRR16 PE=2 SV=1                                   | Q569H4        |                |            | 1       |
| Nuclear pore complex protein Nup153 OS=Homo sapiens GN=NUP153 PE=1 SV=2                      | P49790        |                | 1          |         |
| Nucleotide exchange factor SIL1 OS=Homo sapiens GN=SIL1 PE=1 SV=1                            | Q9H173        |                | 1          |         |
| Poly [ADP-ribose] polymerase 14 OS=Homo sapiens GN=PARP14 PE=1 SV=2                          | Q460N5        |                | 1          |         |
| Plasma protease C1 inhibitor OS=Homo sapiens GN=SERPING1 PE=1 SV=2                           | P05155        |                |            | 1       |
| Plasminogen activator inhibitor 1 RNA-binding protein OS=Homo sapiens GN=SERBP1 PE=1 SV=2    | Q8NC51        |                | 1          |         |
| PI-PLC X domain-containing protein 1 OS=Homo sapiens GN=PLCXD1 PE=2 SV=1                     | Q9NUJ7        |                |            | 1       |
| Platelet-derived growth factor subunit B OS=Homo sapiens GN=PDGFB PE=1 SV=1                  | P01127        |                |            | 1       |
| Pleckstrin homology domain-containing family A member 7 OS=Homo sapiens GN=PLEKHA7 PE=1 SV=2 | Q6IQ23        |                |            | 1       |
| Pleckstrin homology domain-containing family G member 5 OS=Homo sapiens GN=PLEKHG5 PE=2 SV=3 | O94827        |                |            | 1       |
| Plectin OS=Homo sapiens GN=PLEC PE=1 SV=3                                                    | Q15149        |                |            | 3       |
| Phosphomannomutase 2 OS=Homo sapiens GN=PMM2 PE=1 SV=1                                       | O15305        |                |            | 1       |
| Poliovirus receptor-related protein 3 OS=Homo sapiens GN=PVRL3 PE=1 SV=1                     | Q9NQS3        |                |            | 1       |
| P58 killer cell inhibitory receptor KIR-K7c (Fragment) OS=Homo sapiens                       | Q9UNB4        |                | 1          |         |
| Phosphatidylinositol-3,4,5-trisphosphate 5-phosphatase 1 OS=Homo sapiens GN=INPP5D PE=1 SV=2 | Q92835        |                | 1          |         |
| N-terminal kinase-like protein OS=Homo sapiens GN=SCYL1 PE=1 SV=1                            | Q96KG9        |                | 1          |         |
| Poly(A) polymerase gamma OS=Homo sapiens GN=PAPOLG PE=1 SV=2                                 | Q9BWT3        |                |            | 1       |
| Phosphatidylinositol 3-kinase regulatory subunit alpha OS=Homo sapiens GN=PIK3R1 PE=1 SV=2   | P27986        |                |            | 1       |



| Protein peptides                                                                            | Accession No. | icPTPRD-D1521A | icPTPRD-WT | Control |
|---------------------------------------------------------------------------------------------|---------------|----------------|------------|---------|
| Polyadenylate-binding protein 4 OS=Homo sapiens GN=PABPC4 PE=1 SV=1                         | Q13310        |                | 1          |         |
| Polycystin-1 OS=Homo sapiens GN=PKD1 PE=1 SV=3                                              | P98161        |                | 2          | 4       |
| Polypeptide N-acetylgalactosaminyltransferase 3 OS=Homo sapiens GN=GALNT3 PE=2 SV=2         | Q14435        |                |            | 1       |
| Peroxisome assembly protein 12 OS=Homo sapiens GN=PEX12 PE=1 SV=1                           | O00623        |                | 1          |         |
| Polypyrimidine tract-binding protein 1 OS=Homo sapiens GN=PTBP1 PE=1 SV=1                   | P26599        |                |            | 1       |
| Potassium channel subfamily K member 2 OS=Homo sapiens GN=KCNK2 PE=2 SV=2                   | O95069        |                | 1          |         |
| Perilipin-3 OS=Homo sapiens GN=PLIN3 PE=1 SV=2                                              | O60664        |                |            | 4       |
| Paternally-expressed gene 3 protein OS=Homo sapiens GN=PEG3 PE=2 SV=1                       | Q9GZU2        |                |            | 1       |
| Phosphatidylinositol-4-phosphate 5-kinase type-1 alpha OS=Homo sapiens GN=PIP5K1A PE=1 SV=1 | Q99755        |                |            | 1       |
| Myosin-4 OS=Homo sapiens GN=MYH4 PE=1 SV=2                                                  | Q9Y623        |                | 1          |         |
| Protein BAT5 OS=Homo sapiens GN=BAT5 PE=1 SV=3                                              | O95870        |                | 1          |         |
| Protein C20orf11 OS=Homo sapiens GN=C20orf11 PE=1 SV=1                                      | Q9NWU2        |                | 1          |         |
| Protein CBFA2T3 OS=Homo sapiens GN=CBFA2T3 PE=1 SV=2                                        | O75081        |                |            | 1       |
| Myotubularin-related protein 7 OS=Homo sapiens GN=MTMR7 PE=1 SV=3                           | Q9Y216        |                |            | 2       |
| Myotubularin-related protein 6 OS=Homo sapiens GN=MTMR6 PE=1 SV=2                           | Q9Y217        |                |            | 1       |
| Protein cramped-like OS=Homo sapiens GN=CRAMP1L PE=1 SV=3                                   | Q96RY5        |                |            | 1       |
| Myotubularin-related protein 10 OS=Homo sapiens GN=MTMR10 PE=1 SV=3                         | Q9NXD2        |                | 1          |         |
| Protein CXorf40A OS=Homo sapiens GN=CXorf40A PE=1 SV=1                                      | Q8TE69        |                | 1          |         |
| Myosin-XVI OS=Homo sapiens GN=MYO16 PE=1 SV=3                                               | Q9Y6X6        |                |            | 1       |

| Protein peptides                                                                  | Accession No. | icPTPRD-D1521A | icPTPRD-WT | Control |
|-----------------------------------------------------------------------------------|---------------|----------------|------------|---------|
| Nuclear cap-binding protein subunit 1 OS=Homo sapiens GN=NCBP1 PE=1 SV=1          | Q09161        |                | 1          |         |
| Myosin-IId OS=Homo sapiens GN=MYO1D PE=1 SV=2                                     | O94832        |                | 1          | 1       |
| NADPH oxidase 4 OS=Homo sapiens GN=NOX4 PE=1 SV=2                                 | Q9NPH5        |                | 1          |         |
| Myosin light polypeptide 6 OS=Homo sapiens GN=MYL6 PE=1 SV=2                      | P60660        |                |            | 1       |
| Protein FAM179A OS=Homo sapiens GN=FAM179A PE=2 SV=2                              | Q6ZUX3        |                | 1          |         |
| Myosin light chain 6B OS=Homo sapiens GN=MYL6B PE=1 SV=1                          | P14649        |                |            | 1       |
| Myomesin-2 OS=Homo sapiens GN=MYOM2 PE=2 SV=2                                     | P54296        |                | 1          |         |
| Protein FAM55C OS=Homo sapiens GN=FAM55C PE=2 SV=1                                | Q969Y0        |                |            | 1       |
| Myoferlin OS=Homo sapiens GN=MYOF PE=1 SV=1                                       | Q9NZM1        |                |            | 1       |
| Multiple PDZ domain protein OS=Homo sapiens GN=MPDZ PE=1 SV=1                     | O75970        |                | 1          |         |
| Multiple inositol polyphosphate phosphatase 1 OS=Homo sapiens GN=MINPP1 PE=1 SV=1 | Q9UNW1        |                |            | 1       |
| Protein FAM69C OS=Homo sapiens GN=FAM69C PE=2 SV=3                                | Q0P6D2        |                | 1          |         |
| Ig heavy chain V-II region WAH OS=Homo sapiens PE=1 SV=1                          | P01824        |                | 1          |         |
| Myosin-VIIa OS=Homo sapiens GN=MYO7A PE=1 SV=1                                    | Q13402        |                | 1          |         |
| Proteasome subunit alpha type-6 OS=Homo sapiens GN=PSMA6 PE=1 SV=1                | P60900        |                |            | 1       |
| Protein FAM89A OS=Homo sapiens GN=FAM89A PE=2 SV=1                                | Q96G17        |                |            | 1       |
| Novel protein (KIAA0894) OS=Homo sapiens GN=RP11-476E15.3                         | Q5T925        |                |            | 1       |
| Proteasome activator complex subunit 1 OS=Homo sapiens GN=PSME1 PE=1 SV=1         | Q06323        |                |            | 1       |
| Proteasome activator complex subunit 2 OS=Homo sapiens GN=PSME2 PE=1 SV=4         | Q9UL46        |                |            | 1       |

| Protein peptides                                                                             | Accession No. | icPTPRD-D1521A | icPTPRD-WT | Control |
|----------------------------------------------------------------------------------------------|---------------|----------------|------------|---------|
| Nibrin OS=Homo sapiens GN=NBN PE=1 SV=1                                                      | O60934        |                | 1          |         |
| Niban-like protein 1 OS=Homo sapiens GN=FAM129B PE=1 SV=2                                    | Q96TA1        |                |            | 1       |
| NHP2-like protein 1 OS=Homo sapiens GN=NHP2L1 PE=1 SV=3                                      | P55769        |                |            | 1       |
| Proteasome activator complex subunit 3 OS=Homo sapiens GN=PSME3 PE=1 SV=1                    | P61289        |                |            | 1       |
| NFAT5 protein OS=Homo sapiens GN=NFAT5                                                       | A2RRB4        |                |            | 1       |
| Proteasome inhibitor PI31 subunit OS=Homo sapiens GN=PSMF1 PE=1 SV=2                         | Q92530        |                |            | 1       |
| NACHT, LRR and PYD domains-containing protein 7 OS=Homo sapiens GN=NLRP7 PE=1 SV=1           | Q8WX94        |                |            | 2       |
| Neuron navigator 3 OS=Homo sapiens GN=NAV3 PE=1 SV=3                                         | Q8IVL0        |                | 3          |         |
| N-acylsphingosine amidohydrolase (Acid ceramidase) 1, isoform CRA_c OS=Homo sapiens GN=ASAH1 | D3DSQ1        |                |            | 1       |
| Proteasome subunit alpha type-7-like OS=Homo sapiens GN=PSMA8 PE=1 SV=3                      | Q8TAA3        |                |            | 1       |
| Neurobeachin-like protein 1 OS=Homo sapiens GN=NBEAL1 PE=2 SV=3                              | Q6ZS30        |                | 1          |         |
| Neurabin-2 OS=Homo sapiens GN=PPP1R9B PE=1 SV=2                                              | Q96SB3        |                | 1          |         |
| Proteasome subunit beta type-3 OS=Homo sapiens GN=PSMB3 PE=1 SV=2                            | P49720        |                |            | 1       |
| Proteasome subunit beta type-4 OS=Homo sapiens GN=PSMB4 PE=1 SV=4                            | P28070        |                |            | 1       |
| Nesprin-1 OS=Homo sapiens GN=SYNE1 PE=1 SV=3                                                 | Q8NF91        |                |            | 1       |
| Negative elongation factor A OS=Homo sapiens GN=WHSC2 PE=1 SV=3                              | Q9H3P2        |                |            | 1       |
| Nebulin-related-anchoring protein OS=Homo sapiens GN=NRAP PE=2 SV=2                          | Q86VF7        |                | 1          |         |
| Protein ALO17 OS=Homo sapiens GN=KIAA1618 PE=1 SV=2                                          | Q9HCF4        |                | 2          |         |
| ProSAP-interacting protein 1 OS=Homo sapiens GN=PROSAPIP1 PE=2 SV=1                          | O60299        |                | 1          |         |

| Protein peptides                                                                                 | Accession No. | icPTPRD-D1521A | icPTPRD-WT | Control |
|--------------------------------------------------------------------------------------------------|---------------|----------------|------------|---------|
| Proteasome subunit alpha type-5 OS=Homo sapiens GN=PSMA5 PE=1 SV=3                               | P28066        |                |            | 1       |
| Signal transducer and activator of transcription 1-alpha/beta OS=Homo sapiens GN=STAT1 PE=1 SV=2 | P42224        |                |            | 4       |
| E3 ubiquitin-protein ligase ZNRF2 OS=Homo sapiens GN=ZNRF2 PE=1 SV=1                             | Q8NHG8        |                | 1          |         |
| Seven transmembrane helix receptor OS=Homo sapiens                                               | Q8NHC2        |                |            | 1       |
| SH3 and multiple ankyrin repeat domains protein 1 OS=Homo sapiens GN=SHANK1 PE=1 SV=2            | Q9Y566        |                | 1          |         |
| ESF1 homolog OS=Homo sapiens GN=ESF1 PE=1 SV=1                                                   | Q9H501        |                |            | 1       |
| E-selectin OS=Homo sapiens GN=SELE PE=1 SV=1                                                     | P16581        |                | 1          |         |
| Epiplakin OS=Homo sapiens GN=EPPK1 PE=1 SV=2                                                     | P58107        |                | 1          |         |
| Ephexin-1 OS=Homo sapiens GN=NGEF PE=2 SV=2                                                      | Q8N5V2        |                | 1          | 3       |
| Eosinophil lysophospholipase OS=Homo sapiens GN=CLC PE=1 SV=2                                    | Q05315        |                | 1          |         |
| SH3 domain-binding protein 1 OS=Homo sapiens GN=SH3BP1 PE=1 SV=3                                 | Q9Y3L3        |                | 1          |         |
| Seven transmembrane helix receptor OS=Homo sapiens                                               | Q8NHB3        |                | 1          |         |
| EMILIN-2 OS=Homo sapiens GN=EMILIN2 PE=1 SV=3                                                    | Q9BXX0        |                | 1          |         |
| SETMAR protein (Fragment) OS=Homo sapiens GN=SETMAR                                              | Q96H41        |                |            | 1       |
| Elongation factor 1-gamma OS=Homo sapiens GN=EEF1G PE=1 SV=3                                     | P26641        |                |            | 1       |
| Elongation factor 1-delta OS=Homo sapiens GN=EEF1D PE=1 SV=5                                     | P29692        |                |            | 2       |
| Signal transducer and activator of transcription 3 OS=Homo sapiens GN=STAT3 PE=1 SV=2            | P40763        |                | 1          |         |
| Similar to dual specificity phosphatase 9 (Fragment) OS=Homo sapiens                             | Q8N4A4        |                | 1          |         |
| EH domain-binding protein 1-like protein 1 OS=Homo sapiens GN=EHBP1L1 PE=1 SV=2                  | Q8N3D4        |                | 1          |         |

| Protein peptides                                                                         | Accession No. | icPTPRD-D1521A | icPTPRD-WT | Control |
|------------------------------------------------------------------------------------------|---------------|----------------|------------|---------|
| Egl nine homolog 1 OS=Homo sapiens GN=EGLN1 PE=1 SV=1                                    | Q9GZT9        |                |            | 1       |
| EGF-like domain-containing protein C3orf50 OS=Homo sapiens GN=C3orf50 PE=2 SV=1          | Q0D2K5        |                |            | 1       |
| Single-stranded DNA-binding protein 3 OS=Homo sapiens GN=SSBP3 PE=1 SV=1                 | Q9BWW4        |                |            | 1       |
| EF-hand calcium-binding domain-containing protein 5 OS=Homo sapiens GN=EFCAB5 PE=1 SV=2  | A4FU69        |                |            | 1       |
| Ran GTPase-activating protein 1 OS=Homo sapiens GN=RANGAP1 PE=1 SV=1                     | P46060        |                |            | 1       |
| Endoplasmic reticulum chaperone protein OS=Homo sapiens GN=HSP90B1 PE=1 SV=1             | P14625        |                | 3          | 1       |
| Exocyst complex component 5 OS=Homo sapiens GN=EXOC5 PE=1 SV=1                           | O00471        |                | 1          |         |
| Serine protease HTRA2, mitochondrial OS=Homo sapiens GN=HTRA2 PE=1 SV=2                  | O43464        |                |            | 1       |
| Far upstream element-binding protein 1 OS=Homo sapiens GN=FUBP1 PE=1 SV=3                | Q96AE4        |                | 1          | 1       |
| Fanconi-associated nuclease 1 OS=Homo sapiens GN=FAN1 PE=1 SV=4                          | Q9Y2M0        |                |            | 1       |
| Fanconi anemia group A protein OS=Homo sapiens GN=FANCA PE=1 SV=2                        | O15360        |                | 1          |         |
| Serine/arginine repetitive matrix protein 5 OS=Homo sapiens GN=SRRM5 PE=2 SV=3           | B3KS81        |                | 1          |         |
| F-actin-capping protein subunit alpha-1 OS=Homo sapiens GN=CAPZA1 PE=1 SV=3              | P52907        |                |            | 1       |
| Exportin-2 OS=Homo sapiens GN=CSE1L PE=1 SV=3                                            | P55060        |                |            | 6       |
| Exostosin-like 1 OS=Homo sapiens GN=EXTL1 PE=1 SV=2                                      | Q92935        |                | 1          | 1       |
| Serine/threonine-protein kinase MRCK beta OS=Homo sapiens GN=CDC42BPB PE=1 SV=2          | Q9Y5S2        |                |            | 1       |
| Eukaryotic translation initiation factor 2 subunit 1 OS=Homo sapiens GN=EIF2S1 PE=1 SV=3 | P05198        |                | 1          | 1       |
| Exonuclease 3'-5' domain-containing protein 2 OS=Homo sapiens GN=EXD2 PE=1 SV=1          | Q9NVH0        |                | 2          | 1       |
| E3 ubiquitin-protein ligase synoviolin OS=Homo sapiens GN=SYVN1 PE=1 SV=2                | Q86TM6        |                |            | 1       |

| Protein peptides                                                                                                     | Accession No. | icPTPRD-D1521A | icPTPRD-WT | Control |
|----------------------------------------------------------------------------------------------------------------------|---------------|----------------|------------|---------|
| Exocyst complex component 3 OS=Homo sapiens GN=EXOC3 PE=1 SV=2                                                       | O60645        |                | 1          |         |
| Excitatory amino acid transporter 1 OS=Homo sapiens GN=SLC1A3 PE=1 SV=1                                              | P43003        |                | 1          |         |
| Serine/threonine-protein phosphatase 2A 56 kDa regulatory subunit delta isoform OS=Homo sapiens GN=PPP2R5D PE=1 SV=1 | Q14738        |                |            | 1       |
| Serine/threonine-protein phosphatase 2A catalytic subunit alpha isoform OS=Homo sapiens GN=PPP2CA PE=1 SV=1          | P67775        |                |            | 1       |
| Serine/threonine-protein phosphatase 2A regulatory subunit B' subunit beta OS=Homo sapiens GN=PPP2R3B PE=1 SV=2      | Q9Y5P8        |                |            | 1       |
| Serine/threonine-protein phosphatase PP1-alpha catalytic subunit OS=Homo sapiens GN=PPP1CA PE=1 SV=1                 | P62136        |                |            | 1       |
| Serpin B3 OS=Homo sapiens GN=SERPINB3 PE=1 SV=2                                                                      | P29508        |                | 4          |         |
| Eukaryotic translation initiation factor 3 subunit C OS=Homo sapiens GN=EIF3C PE=1 SV=1                              | Q99613        |                | 2          |         |
| Serpin B4 OS=Homo sapiens GN=SERPINB4 PE=1 SV=2                                                                      | P48594        |                | 1          |         |
| SET domain-containing protein 5 OS=Homo sapiens GN=SETD5 PE=1 SV=2                                                   | Q9C0A6        |                | 1          |         |
| Serine/threonine-protein kinase Nek1 OS=Homo sapiens GN=NEK1 PE=1 SV=2                                               | Q96PY6        |                | 1          |         |
| Disintegrin and metalloproteinase domain-containing protein 2 OS=Homo sapiens GN=ADAM2 PE=1 SV=2                     | Q99965        |                | 1          |         |
| SLAIN motif-containing protein 2 OS=Homo sapiens GN=SLAIN2 PE=1 SV=2                                                 | Q9P270        |                | 1          |         |
| DNA2-like helicase OS=Homo sapiens GN=DNA2 PE=1 SV=3                                                                 | P51530        |                | 1          |         |
| DNA topoisomerase 2-alpha OS=Homo sapiens GN=TOP2A PE=1 SV=3                                                         | P11388        |                |            | 1       |
| Spermine oxidase OS=Homo sapiens GN=SMOX PE=1 SV=1                                                                   | Q9NWM0        |                | 1          |         |
| DNA repair protein complementing XP-C cells OS=Homo sapiens GN=XPC PE=1 SV=4                                         | Q01831        |                |            | 1       |
| DNA polymerase theta OS=Homo sapiens GN=POLQ PE=1 SV=1                                                               | O75417        |                | 1          |         |
| Splicing factor 3A subunit 1 OS=Homo sapiens GN=SF3A1 PE=1 SV=1                                                      | Q15459        |                | 1          |         |

| Protein peptides                                                                      | Accession No. | icPTPRD-D1521A | icPTPRD-WT | Control |
|---------------------------------------------------------------------------------------|---------------|----------------|------------|---------|
| DNA ligase 1 OS=Homo sapiens GN=LIG1 PE=1 SV=1                                        | P18858        |                | 1          |         |
| DNA dC->dU-editing enzyme APOBEC-3F OS=Homo sapiens GN=APOBEC3F PE=1 SV=3             | Q8IUX4        |                | 1          |         |
| Spermatogenesis-associated protein 5 OS=Homo sapiens GN=SPATA5 PE=1 SV=3              | Q8NB90        |                | 1          |         |
| Disks large-associated protein 1 OS=Homo sapiens GN=DLGAP1 PE=1 SV=1                  | O14490        |                |            | 1       |
| Spermatid perinuclear RNA-binding protein OS=Homo sapiens GN=STRBP PE=1 SV=1          | Q96S19        |                |            | 2       |
| Disheveled-associated activator of morphogenesis 2 OS=Homo sapiens GN=DAAM2 PE=2 SV=3 | Q86T65        |                |            | 2       |
| Dipeptidyl peptidase 4 OS=Homo sapiens GN=DPP4 PE=1 SV=2                              | P27487        |                |            | 1       |
| Dipeptidyl aminopeptidase-like protein 6 OS=Homo sapiens GN=DPP6 PE=1 SV=2            | P42658        |                |            | 1       |
| DET1 homolog OS=Homo sapiens GN=DET1 PE=1 SV=2                                        | Q7L5Y6        |                |            | 1       |
| Stathmin OS=Homo sapiens GN=STMN1 PE=1 SV=3                                           | P16949        |                | 1          |         |
| Sterol regulatory element-binding protein 2 OS=Homo sapiens GN=SREBF2 PE=1 SV=2       | Q12772        |                |            | 1       |
| Structural maintenance of chromosomes protein 1B OS=Homo sapiens GN=SMC1B PE=1 SV=2   | Q8NDV3        |                | 1          |         |
| Structure-specific endonuclease subunit SLX4 OS=Homo sapiens GN=SLX4 PE=1 SV=3        | Q8IY92        |                |            | 1       |
| Sulfide:quinone oxidoreductase, mitochondrial OS=Homo sapiens GN=SQRDL PE=1 SV=1      | Q9Y6N5        |                |            | 1       |
| Cytosolic purine 5'-nucleotidase OS=Homo sapiens GN=NT5C2 PE=1 SV=1                   | P49902        |                |            | 1       |
| DNA (cytosine-5)-methyltransferase 1 OS=Homo sapiens GN=DNMT1 PE=1 SV=2               | P26358        |                | 1          |         |
| Dynein heavy chain 17, axonemal OS=Homo sapiens GN=DNAH17 PE=2 SV=2                   | Q9UFH2        |                | 1          |         |
| E3 ubiquitin-protein ligase RNF149 OS=Homo sapiens GN=RNF149 PE=2 SV=2                | Q8NC42        |                |            | 1       |
| Sodium/potassium/calcium exchanger 2 OS=Homo sapiens GN=SLC24A2 PE=2 SV=1             | Q9UI40        |                | 1          |         |

| Protein peptides                                                                                               | Accession No. | icPTPRD-D1521A | icPTPRD-WT | Control |
|----------------------------------------------------------------------------------------------------------------|---------------|----------------|------------|---------|
| Solute carrier family 12 (Potassium/chloride transporters), member 4, isoform CRA_e OS=Homo sapiens GN=SLC12A4 | B3KUS0        |                |            | 1       |
| E3 ubiquitin-protein ligase MARCH11 OS=Homo sapiens GN=MARCH11 PE=2 SV=3                                       | A6NNE9        |                |            | 1       |
| Solute carrier family 2, facilitated glucose transporter member 9 OS=Homo sapiens GN=SLC2A9 PE=1 SV=2          | Q9NRM0        |                | 1          |         |
| Solute carrier family 22 member 3 OS=Homo sapiens GN=SLC22A3 PE=1 SV=1                                         | O75751        |                |            | 1       |
| E2F3 protein OS=Homo sapiens GN=E2F3                                                                           | Q499G5        |                |            | 1       |
| Sorbin and SH3 domain-containing protein 1 OS=Homo sapiens GN=SORBS1 PE=1 SV=2                                 | Q9BX66        |                | 1          |         |
| Dynein light chain 1, cytoplasmic OS=Homo sapiens GN=DYNLL1 PE=1 SV=1                                          | P63167        |                |            | 1       |
| Spermatogenesis-associated protein 5-like protein 1 OS=Homo sapiens GN=SPATA5L1 PE=1 SV=2                      | Q9BVQ7        |                |            | 1       |
| Dynein heavy chain 2, axonemal OS=Homo sapiens GN=DNAH2 PE=1 SV=3                                              | Q9P225        |                |            | 2       |
| FERM domain-containing protein 4A OS=Homo sapiens GN=FRMD4A PE=1 SV=3                                          | Q9P2Q2        |                |            | 1       |
| Sorting nexin-1 OS=Homo sapiens GN=SNX1 PE=1 SV=3                                                              | Q13596        |                |            | 1       |
| Dynamin-1 OS=Homo sapiens GN=DNM1 PE=1 SV=2                                                                    | Q05193        |                | 1          |         |
| Sorting nexin-16 OS=Homo sapiens GN=SNX16 PE=1 SV=2                                                            | P57768        |                |            | 1       |
| Dynactin subunit 1 OS=Homo sapiens GN=DCTN1 PE=1 SV=3                                                          | Q14203        |                | 1          | 1       |
| Sorting nexin-29 OS=Homo sapiens GN=SNX29 PE=1 SV=2                                                            | Q8TEQ0        |                |            | 1       |
| Dual oxidase 1 OS=Homo sapiens GN=DUOX1 PE=1 SV=1                                                              | Q9NRD9        |                |            | 1       |
| DPY30 domain-containing protein 1 OS=Homo sapiens GN=DYDC1 PE=1 SV=1                                           | Q8WWB3        |                | 1          |         |
| Double-stranded RNA-specific editase 1 OS=Homo sapiens GN=ADARB1 PE=1 SV=1                                     | P78563        |                |            | 1       |
| Docking protein 3 OS=Homo sapiens GN=DOK3 PE=1 SV=2                                                            | Q7L591        |                | 1          |         |



| Protein peptides                                                                 | Accession No. | icPTPRD-D1521A | icPTPRD-WT | Control |
|----------------------------------------------------------------------------------|---------------|----------------|------------|---------|
| Sperm acrosome membrane-associated protein 3 OS=Homo sapiens GN=SPACA3 PE=1 SV=1 | Q8IXA5        |                | 1          |         |
| Dynein heavy chain 5, axonemal OS=Homo sapiens GN=DNAH5 PE=1 SV=3                | Q8TE73        |                | 1          | 3       |
| HEAT repeat-containing protein 5A OS=Homo sapiens GN=HEATR5A PE=1 SV=2           | Q86XA9        |                |            | 1       |
| F-box only protein 10 OS=Homo sapiens GN=FBXO10 PE=2 SV=3                        | Q9UK96        |                | 1          |         |
| Hephaestin-like protein 1 OS=Homo sapiens GN=HEPHL1 PE=2 SV=2                    | Q6MZM0        |                |            | 1       |
| Ribonucleases P/MRP protein subunit POP1 OS=Homo sapiens GN=POP1 PE=1 SV=2       | Q99575        |                | 1          |         |
| Hemoglobin subunit gamma-1 OS=Homo sapiens GN=HBG1 PE=1 SV=2                     | P69891        |                | 1          |         |
| Helicase-like transcription factor OS=Homo sapiens GN=HLTF PE=1 SV=2             | Q14527        |                | 1          |         |
| Ribonucleoprotein PTB-binding 1 OS=Homo sapiens GN=RAVER1 PE=1 SV=1              | Q8IY67        |                | 1          |         |
| Ribose-phosphate pyrophosphokinase 3 OS=Homo sapiens GN=PRPS1L1 PE=1 SV=2        | P21108        |                |            | 1       |
| Ribosomal protein S6 kinase alpha-6 OS=Homo sapiens GN=RPS6KA6 PE=1 SV=1         | Q9UK32        |                |            | 1       |
| Heat shock protein beta-2 OS=Homo sapiens GN=HSPB2 PE=1 SV=2                     | Q16082        |                |            | 1       |
| HES5 protein OS=Homo sapiens GN=HES5                                             | Q5M8T3        |                |            | 1       |
| RILP-like protein 1 OS=Homo sapiens GN=RILPL1 PE=1 SV=1                          | Q5EBL4        |                |            | 1       |
| Heterogeneous nuclear ribonucleoprotein A0 OS=Homo sapiens GN=HNRNPA0 PE=1 SV=1  | Q13151        |                | 1          |         |
| HCG2011465 (Fragment) OS=Homo sapiens GN=hCG_2011465                             | Q8WW44        |                |            | 1       |
| HCG1990398 OS=Homo sapiens GN=hCG_1990398                                        | Q9BZU2        |                | 1          |         |
| RING finger protein 146 OS=Homo sapiens GN=RNF146 PE=1 SV=1                      | Q9NTX7        |                | 1          |         |
| Harmonin OS=Homo sapiens GN=USH1C PE=1 SV=3                                      | Q9Y6N9        |                | 1          |         |

| Protein peptides                                                                        | Accession No. | icPTPRD-D1521A | icPTPRD-WT | Control |
|-----------------------------------------------------------------------------------------|---------------|----------------|------------|---------|
| H(+)/Cl(-) exchange transporter 5 OS=Homo sapiens GN=CLCN5 PE=1 SV=1                    | P51795        |                | 1          |         |
| RING finger protein 150 OS=Homo sapiens GN=RNF150 PE=2 SV=2                             | Q9ULK6        |                |            | 1       |
| Guanylate cyclase soluble subunit alpha-3 OS=Homo sapiens GN=GUCY1A3 PE=1 SV=2          | Q02108        |                | 1          |         |
| Guanine nucleotide-binding protein-like 1 OS=Homo sapiens GN=GNL1 PE=1 SV=2             | P36915        |                |            | 1       |
| RNA 3'-terminal phosphate cyclase-like protein OS=Homo sapiens GN=RCL1 PE=1 SV=3        | Q9Y2P8        |                | 1          |         |
| Guanine nucleotide exchange factor DBS OS=Homo sapiens GN=MCF2L PE=1 SV=2               | O15068        |                | 1          |         |
| Ribosomal protein S6 modification-like protein B OS=Homo sapiens GN=RIMKLB PE=2 SV=2    | Q9ULI2        |                | 1          |         |
| Receptor-type tyrosine-protein phosphatase zeta OS=Homo sapiens GN=PTPRZ1 PE=1 SV=4     | P23471        |                | 1          | 1       |
| Ran-binding protein 9 OS=Homo sapiens GN=RANBP9 PE=1 SV=1                               | Q96S59        |                | 1          | 1       |
| Hydroxymethylglutaryl-CoA synthase, mitochondrial OS=Homo sapiens GN=HMGCS2 PE=1 SV=1   | P54868        |                | 1          |         |
| Hydroxyacyl-coenzyme A dehydrogenase, mitochondrial OS=Homo sapiens GN=HADH PE=1 SV=3   | Q16836        |                | 1          |         |
| Hydrocephalus-inducing protein homolog OS=Homo sapiens GN=HYDIN PE=1 SV=2               | Q4G0P3        |                |            | 1       |
| Hyaluronan mediated motility receptor OS=Homo sapiens GN=HMMR PE=1 SV=2                 | O75330        |                |            | 1       |
| Ras GTPase-activating protein-binding protein 1 OS=Homo sapiens GN=G3BP1 PE=1 SV=1      | Q13283        |                |            | 1       |
| Ras-associating and dilute domain-containing protein OS=Homo sapiens GN=RADIL PE=1 SV=4 | Q96JH8        |                |            | 1       |
| Ras-related protein Rab-11A OS=Homo sapiens GN=RAB11A PE=1 SV=3                         | P62491        |                |            | 3       |
| Ras-related protein Rab-7a OS=Homo sapiens GN=RAB7A PE=1 SV=1                           | P51149        |                |            | 1       |
| Rho guanine nucleotide exchange factor 16 OS=Homo sapiens GN=ARHGEF16 PE=1 SV=1         | Q5VV41        |                | 1          |         |
| Receptor-type tyrosine-protein phosphatase S OS=Homo sapiens GN=PTPRS PE=1 SV=2         | Q13332        |                |            | 1       |

| Protein peptides                                                                              | Accession No. | icPTPRD-D1521A | icPTPRD-WT | Control |
|-----------------------------------------------------------------------------------------------|---------------|----------------|------------|---------|
| GTPase IMAP family member 6 OS=Homo sapiens GN=GIMAP6 PE=2 SV=1                               | Q6P9H5        |                |            | 1       |
| Regulator of G-protein signaling 9 OS=Homo sapiens GN=RGS9 PE=1 SV=1                          | O75916        |                |            | 1       |
| REST corepressor 3 OS=Homo sapiens GN=RCOR3 PE=1 SV=2                                         | Q9P2K3        |                |            | 1       |
| Reticulon-4-interacting protein 1, mitochondrial OS=Homo sapiens GN=RTN4IP1 PE=1 SV=2         | Q8WWV3        |                | 1          |         |
| Highly divergent homeobox OS=Homo sapiens GN=HDX PE=1 SV=1                                    | Q7Z353        |                | 1          |         |
| Rho GTPase-activating protein 11B OS=Homo sapiens GN=ARHGAP11B PE=1 SV=1                      | Q3KRB8        |                | 1          |         |
| Rho guanine nucleotide exchange factor 1 OS=Homo sapiens GN=ARHGEF1 PE=1 SV=2                 | Q92888        |                | 1          |         |
| Heterogeneous nuclear ribonucleoprotein H2 OS=Homo sapiens GN=HNRNPH2 PE=1 SV=1               | P55795        |                | 1          |         |
| Rho guanine nucleotide exchange factor 10-like protein OS=Homo sapiens GN=ARHGEF10L PE=1 SV=2 | Q9HCE6        |                |            | 1       |
| Heterogeneous nuclear ribonucleoprotein F OS=Homo sapiens GN=HNRNPF PE=1 SV=3                 | P52597        |                | 1          |         |
| Heterogeneous nuclear ribonucleoprotein A1-like 2 OS=Homo sapiens GN=HNRNPA1L2 PE=2 SV=2      | Q32P51        |                | 1          |         |
| Homeobox protein Nkx-2.3 OS=Homo sapiens GN=NKX2-3 PE=1 SV=2                                  | Q8TAU0        |                |            | 1       |
| Four and a half LIM domains protein 2 OS=Homo sapiens GN=FHL2 PE=1 SV=3                       | Q14192        |                |            | 1       |
| GDP-fucose protein O-fucosyltransferase 2 OS=Homo sapiens GN=POFUT2 PE=2 SV=3                 | Q9Y2G5        |                |            | 1       |
| Gasdermin-B OS=Homo sapiens GN=GSDMB PE=1 SV=2                                                | Q8TAX9        |                |            | 1       |
| GAS2-like protein 3 OS=Homo sapiens GN=GAS2L3 PE=1 SV=1                                       | Q86XJ1        |                | 1          |         |
| Gamma-tubulin complex component 2 OS=Homo sapiens GN=TUBGCP2 PE=1 SV=2                        | Q9BSJ2        |                |            | 1       |
| Gamma-aminobutyric acid receptor subunit epsilon OS=Homo sapiens GN=GABRE PE=2 SV=2           | P78334        |                |            | 2       |
| Semenogelin-2 OS=Homo sapiens GN=SEMG2 PE=1 SV=1                                              | Q02383        |                | 2          |         |

| Protein peptides                                                                                                | Accession No. | icPTPRD-D1521A | icPTPRD-WT | Control |
|-----------------------------------------------------------------------------------------------------------------|---------------|----------------|------------|---------|
| Galectin-7 OS=Homo sapiens GN=LGALS7 PE=1 SV=2                                                                  | P47929        |                | 1          |         |
| Galectin-3 OS=Homo sapiens GN=LGALS3 PE=1 SV=5                                                                  | P17931        |                |            | 3       |
| Galectin-1 OS=Homo sapiens GN=LGALS1 PE=1 SV=2                                                                  | P09382        |                |            | 2       |
| GTP-binding protein Rhes OS=Homo sapiens GN=RASD2 PE=1 SV=1                                                     | Q96D21        |                |            | 1       |
| Four-jointed box protein 1 OS=Homo sapiens GN=FJX1 PE=2 SV=1                                                    | Q86VR8        |                |            | 1       |
| Semaphorin-6D OS=Homo sapiens GN=SEMA6D PE=1 SV=1                                                               | Q8NFY4        |                | 1          |         |
| Forkhead box protein F2 OS=Homo sapiens GN=FOXF2 PE=1 SV=2                                                      | Q12947        |                | 1          |         |
| FKSG42 OS=Homo sapiens GN=FKSG42                                                                                | Q9BZ74        |                | 1          |         |
| Sepiapterin reductase OS=Homo sapiens GN=SPR PE=1 SV=1                                                          | P35270        |                |            | 1       |
| Seprase OS=Homo sapiens GN=FAP PE=1 SV=5                                                                        | Q12884        |                |            | 1       |
| Septin-9 OS=Homo sapiens GN=SEPT9 PE=1 SV=2                                                                     | Q9UHD8        |                |            | 1       |
| Sequestosome-1 OS=Homo sapiens GN=SQSTM1 PE=1 SV=1                                                              | Q13501        |                |            | 2       |
| Fibronectin OS=Homo sapiens GN=FN1 PE=1 SV=4                                                                    | P02751        |                | 4          |         |
| FERM, RhoGEF and pleckstrin domain-containing protein 2 OS=Homo sapiens GN=FARP2 PE=1 SV=3                      | O94887        |                |            | 1       |
| FERM, RhoGEF (ARHGEF) and pleckstrin domain protein 1 (Chondrocyte-derived) (Fragment) OS=Homo sapiens GN=FARP1 | Q5JV91        |                |            | 1       |
| Superkiller viralicidic activity 2-like 2 OS=Homo sapiens GN=SKIV2L2 PE=1 SV=3                                  | P42285        |                | 1          |         |
| Separin OS=Homo sapiens GN=ESPL1 PE=1 SV=3                                                                      | Q14674        |                |            | 2       |
| Glutamine-rich protein 2 OS=Homo sapiens GN=QRICH2 PE=1 SV=1                                                    | Q9H0J4        |                | 1          |         |
| F-box/LRR-repeat protein 18 OS=Homo sapiens GN=FBXL18 PE=2 SV=2                                                 | Q96ME1        |                |            | 1       |

| Protein peptides                                                                                       | Accession No. | icPTPRD-D1521A | icPTPRD-WT | Control |
|--------------------------------------------------------------------------------------------------------|---------------|----------------|------------|---------|
| Graves disease carrier protein OS=Homo sapiens GN=SLC25A16 PE=2 SV=3                                   | P16260        |                |            | 1       |
| GRAM domain-containing protein 1B OS=Homo sapiens GN=GRAMD1B PE=1 SV=1                                 | Q3KR37        |                |            | 1       |
| GPI ethanolamine phosphate transferase 2 OS=Homo sapiens GN=PIGG PE=1 SV=1                             | Q5H8A4        |                |            | 1       |
| GON-4-like protein OS=Homo sapiens GN=GON4L PE=1 SV=1                                                  | Q3T8J9        |                |            | 1       |
| RNA polymerase II transcription factor SIII subunit A3-like-1 OS=Homo sapiens GN=TCEB3CL PE=2 SV=1     | Q3SY89        |                |            | 1       |
| RUN and FYVE domain-containing protein 4 OS=Homo sapiens GN=RUFY4 PE=2 SV=2                            | Q6ZNE9        |                |            | 1       |
| Glycosyltransferase 1 domain-containing protein 1 OS=Homo sapiens GN=GLT1D1 PE=2 SV=2                  | Q96MS3        |                | 1          |         |
| Glycogenin-1 OS=Homo sapiens GN=GYG1 PE=1 SV=4                                                         | P46976        |                | 2          |         |
| Glycerophosphodiester phosphodiesterase domain-containing protein 1 OS=Homo sapiens GN=GDPD1 PE=1 SV=2 | Q8N9F7        |                |            | 1       |
| Gelsolin OS=Homo sapiens GN=GSN PE=1 SV=1                                                              | P06396        |                |            | 1       |
| Ryanodine receptor 2 OS=Homo sapiens GN=RYSR2 PE=1 SV=3                                                | Q92736        |                | 1          |         |
| Semenogelin-1 OS=Homo sapiens GN=SEMG1 PE=1 SV=2                                                       | P04279        |                | 8          |         |
| Glutamate receptor, ionotropic kainate 1 OS=Homo sapiens GN=GRIK1 PE=1 SV=1                            | P39086        |                | 1          | 1       |
| Glial fibrillary acidic protein OS=Homo sapiens GN=GFAP PE=1 SV=1                                      | P14136        |                |            | 1       |
| GH3 domain-containing protein OS=Homo sapiens GN=GHD3 PE=1 SV=2                                        | Q8N2G8        |                | 1          |         |
| General vesicular transport factor p115 OS=Homo sapiens GN=USO1 PE=1 SV=2                              | O60763        |                |            | 2       |
| General transcription factor II-I OS=Homo sapiens GN=GTF2I PE=1 SV=2                                   | P78347        |                |            | 1       |
| General transcription factor 3C polypeptide 2 OS=Homo sapiens GN=GTF3C2 PE=1 SV=2                      | Q8WUA4        |                |            | 1       |
| Secreted frizzled-related protein 1 OS=Homo sapiens GN=SFRP1 PE=1 SV=1                                 | Q8N474        |                | 1          |         |

| Protein peptides                                                                                                                                                                                    | Accession No. | icPTPRD-D1521A | icPTPRD-WT | Control |
|-----------------------------------------------------------------------------------------------------------------------------------------------------------------------------------------------------|---------------|----------------|------------|---------|
| Secretory phospholipase A2 receptor OS=Homo sapiens GN=PLA2R1 PE=1 SV=2                                                                                                                             | Q13018        |                | 1          | 1       |
| Semaphorin-6C OS=Homo sapiens GN=SEMA6C PE=2 SV=4                                                                                                                                                   | Q9H3T2        |                |            | 1       |
| GTP-binding protein 5 OS=Homo sapiens GN=GTPBP5 PE=2 SV=1                                                                                                                                           | Q9H4K7        |                | 1          |         |
| Glutaredoxin-3 OS=Homo sapiens GN=GLRX3 PE=1 SV=2                                                                                                                                                   | O76003        |                |            | 1       |
| <p>icPTPRD-D1521A: intracellular PTPRD having two phosphatase domains and bearing D1521A mutation;</p> <p>icPTPRD-WT: intracellular PTPRD having two phosphatase domains; Control: Vector alone</p> |               |                |            |         |

**Supp. Table S7. Mass spectrometry data showing minimum of two peptides from PTPRD interactome obtained from icPTPRD-WT and icPTPRD-D1521A expressing Sk-Mel-28 cells induced by doxycycline for 24h**

| Protein peptides                                                                                      | Accession No. | icPTPRD-D1521A | icPTPRD-WT |        |
|-------------------------------------------------------------------------------------------------------|---------------|----------------|------------|--------|
| RNA-binding protein 10 OS=Homo sapiens GN=RBM10 PE=1 SV=3                                             | P98175        | 33             | 25         | Common |
| Probable ATP-dependent RNA helicase DDX20 OS=Homo sapiens GN=DDX20 PE=1 SV=2                          | Q9UHI6        | 27             | 20         | Common |
| Splicing factor 3B subunit 3 OS=Homo sapiens GN=SF3B3 PE=1 SV=4                                       | Q15393        | 16             | 17         | Common |
| Kinesin-like protein KIF11 OS=Homo sapiens GN=KIF11 PE=1 SV=2                                         | P52732        | 15             | 16         | Common |
| Protein arginine N-methyltransferase 5 OS=Homo sapiens GN=PRMT5 PE=1 SV=4                             | O14744        | 48             | 15         | Common |
| Gem-associated protein 5 OS=Homo sapiens GN=GEMIN5 PE=1 SV=3                                          | Q8TEQ6        | 24             | 15         | Common |
| Component of gems 4 OS=Homo sapiens GN=GEMIN4 PE=1 SV=1                                               | P57678        | 24             | 14         | Common |
| U5 small nuclear ribonucleoprotein 200 kDa helicase OS=Homo sapiens GN=SNRNP200 PE=1 SV=2             | O75643        | 20             | 13         | Common |
| Methylosome protein 50 OS=Homo sapiens GN=WDR77 PE=1 SV=1                                             | Q9BQA1        | 11             | 12         | Common |
| Putative pre-mRNA-splicing factor ATP-dependent RNA helicase DHX15 OS=Homo sapiens GN=DHX15 PE=1 SV=2 | O43143        | 7              | 10         | Common |
| Splicing factor 3B subunit 1 OS=Homo sapiens GN=SF3B1 PE=1 SV=3                                       | O75533        | 16             | 9          | Common |
| RING finger protein 219 OS=Homo sapiens GN=RNF219 PE=1 SV=1                                           | Q5W0B1        | 12             | 7          | Common |
| Serine/threonine-protein kinase RIO1 OS=Homo sapiens GN=RIOK1 PE=1 SV=2                               | Q9BRS2        | 11             | 7          | Common |
| IQ motif and SEC7 domain-containing protein 1 OS=Homo sapiens GN=IQSEC1 PE=1 SV=1                     | Q6DN90        | 7              | 7          | Common |
| Nucleolin OS=Homo sapiens GN=NCL PE=1 SV=3                                                            | P19338        | 7              | 7          | Common |
| E3 ubiquitin-protein ligase RNF180 OS=Homo sapiens GN=RNF180 PE=2 SV=2                                | Q86T96        | 3              | 7          | Common |
| Methylosome subunit pICln OS=Homo sapiens GN=CLNS1A PE=1 SV=1                                         | P54105        | 15             | 6          | Common |

| <b>Protein peptides</b>                                                                  | <b>Accession No.</b> | <b>icTPRD-D1521A</b> | <b>icTPRD-WT</b> |        |
|------------------------------------------------------------------------------------------|----------------------|----------------------|------------------|--------|
| OTU domain-containing protein 4 OS=Homo sapiens GN=OTUD4 PE=1 SV=3                       | Q01804               | 12                   | 6                | Common |
| Splicing factor 3B subunit 2 OS=Homo sapiens GN=SF3B2 PE=1 SV=2                          | Q13435               | 4                    | 6                | Common |
| MORC family CW-type zinc finger protein 2 OS=Homo sapiens GN=MORC2 PE=1 SV=2             | Q9Y6X9               | 2                    | 6                | Common |
| Heterogeneous nuclear ribonucleoprotein H OS=Homo sapiens GN=HNRNPH1 PE=1 SV=4           | P31943               | 7                    | 5                | Common |
| Transcription factor E2F7 OS=Homo sapiens GN=E2F7 PE=1 SV=3                              | Q96AV8               | 6                    | 5                | Common |
| U4/U6 small nuclear ribonucleoprotein Prp31 OS=Homo sapiens GN=PRPF31 PE=1 SV=2          | Q8WWY3               | 5                    | 5                | Common |
| Autophagy-related protein 2 homolog B OS=Homo sapiens GN=ATG2B PE=1 SV=5                 | Q96BY7               | 4                    | 5                | Common |
| Pre-mRNA-processing-splicing factor 8 OS=Homo sapiens GN=PRPF8 PE=1 SV=2                 | Q6P2Q9               | 8                    | 4                | Common |
| 116 kDa U5 small nuclear ribonucleoprotein component OS=Homo sapiens GN=EFTUD2 PE=1 SV=1 | Q15029               | 6                    | 4                | Common |
| Uncharacterized protein C11orf84 OS=Homo sapiens GN=C11orf84 PE=1 SV=3                   | Q9BUA3               | 6                    | 4                | Common |
| Calmodulin-regulated spectrin-associated protein 3 OS=Homo sapiens GN=KIAA1543 PE=1 SV=2 | Q9P1Y5               | 6                    | 4                | Common |
| ATP-dependent RNA helicase A OS=Homo sapiens GN=DHX9 PE=1 SV=4                           | Q08211               | 6                    | 4                | Common |
| Heterogeneous nuclear ribonucleoprotein U OS=Homo sapiens GN=HNRNPU PE=1 SV=6            | Q00839               | 4                    | 4                | Common |
| 40S ribosomal protein S3 OS=Homo sapiens GN=RPS3 PE=1 SV=2                               | P23396               | 4                    | 4                | Common |
| Importin-8 OS=Homo sapiens GN=IPO8 PE=1 SV=2                                             | O15397               | 2                    | 4                | Common |
| Eukaryotic translation initiation factor 4B OS=Homo sapiens GN=EIF4B PE=1 SV=2           | P23588               | 18                   | 3                | Common |
| CAD protein OS=Homo sapiens GN=CAD PE=1 SV=3                                             | P27708               | 6                    | 3                | Common |
| CCR4-NOT transcription complex subunit 1 OS=Homo sapiens GN=CNOT1 PE=1 SV=2              | A5YKK6               | 5                    | 3                | Common |
| Pre-mRNA-processing factor 19 OS=Homo sapiens GN=PRPF19 PE=1 SV=1                        | Q9UMS4               | 3                    | 3                | Common |



| Protein peptides                                                                                                  | Accession No. | icPTPRD-D1521A | icPTPRD-WT |        |
|-------------------------------------------------------------------------------------------------------------------|---------------|----------------|------------|--------|
| TGF-beta-activated kinase 1 and MAP3K7-binding protein 2 OS=Homo sapiens GN=TAB2 PE=1 SV=1                        | Q9NYJ8        | 2              | 3          | Common |
| Interleukin enhancer-binding factor 2 OS=Homo sapiens GN=ILF2 PE=1 SV=2                                           | Q12905        | 2              | 3          | Common |
| Pre-mRNA branch site protein p14 OS=Homo sapiens GN=SF3B14 PE=1 SV=1                                              | Q9Y3B4        | 2              | 3          | Common |
| Ras-related protein Rab-19 OS=Homo sapiens GN=RAB19 PE=2 SV=2                                                     | A4D1S5        | 2              | 3          | Common |
| Putative tyrosine-protein phosphatase TPTE OS=Homo sapiens GN=TPTE PE=2 SV=3                                      | P56180        | 2              | 3          | Common |
| Small nuclear ribonucleoprotein Sm D2 OS=Homo sapiens GN=SNRPD2 PE=1 SV=1                                         | P62316        | 6              | 2          | Common |
| Heat shock 70 kDa protein 1A/1B OS=Homo sapiens GN=HSPA1A PE=1 SV=5                                               | P08107        | 5              | 2          | Common |
| UDP-N-acetylglucosamine--peptide N-acetylglucosaminyltransferase 110 kDa subunit OS=Homo sapiens GN=OGT PE=1 SV=3 | O15294        | 4              | 2          | Common |
| Receptor-type tyrosine-protein phosphatase F OS=Homo sapiens GN=PTPRF PE=1 SV=2                                   | P10586        | 4              | 2          | Common |
| Lamin-B1 OS=Homo sapiens GN=LMNB1 PE=1 SV=2                                                                       | P20700        | 3              | 2          | Common |
| 40S ribosomal protein S24 OS=Homo sapiens GN=RPS24 PE=1 SV=1                                                      | P62847        | 3              | 2          | Common |
| Non-POU domain-containing octamer-binding protein OS=Homo sapiens GN=NONO PE=1 SV=4                               | Q15233        | 3              | 2          | Common |
| Trypsin-1 OS=Homo sapiens GN=PRSS1 PE=1 SV=1                                                                      | P07477        | 3              | 2          | Common |
| 40S ribosomal protein S7 OS=Homo sapiens GN=RPS7 PE=1 SV=1                                                        | P62081        | 2              | 2          | Common |
| Syntaxin-binding protein 3 OS=Homo sapiens GN=STXBP3 PE=1 SV=2                                                    | O00186        | 2              | 2          | Common |
| Eukaryotic translation initiation factor 3 subunit E OS=Homo sapiens GN=EIF3E PE=1 SV=1                           | P60228        | 2              | 2          | Common |
| Uncharacterized protein C10orf82 OS=Homo sapiens GN=C10orf82 PE=2 SV=2                                            | Q8WW14        | 2              | 2          | Common |
| U2-associated protein SR140 OS=Homo sapiens GN=SR140 PE=1 SV=2                                                    | O15042        | 2              | 2          | Common |
| Pre-mRNA-processing factor 6 OS=Homo sapiens GN=PRPF6 PE=1 SV=1                                                   | O94906        | 2              | 2          | Common |

| Protein peptides                                                                        | Accession No. | icPTPRD-D1521A | icPTPRD-WT |            |
|-----------------------------------------------------------------------------------------|---------------|----------------|------------|------------|
| NACHT, LRR and PYD domains-containing protein 1 OS=Homo sapiens GN=NLRP1 PE=1 SV=1      | Q9C000        | 2              | 2          | Common     |
| Retinal dehydrogenase 2 OS=Homo sapiens GN=ALDH1A2 PE=1 SV=3                            | O94788        | 2              | 2          | Common     |
| Transcription elongation factor B polypeptide 1 OS=Homo sapiens GN=TCEB1 PE=1 SV=1      | Q15369        | 2              | 2          | Common     |
| Uncharacterized protein OS=Homo sapiens GN=DSTYK                                        | C9J9G6        | 2              | 2          | Common     |
| Semenogelin-1 OS=Homo sapiens GN=SEMG1 PE=1 SV=2                                        | P04279        | 0              | 8          | Not Common |
| Glycosyltransferase 25 family member 3 OS=Homo sapiens GN=CERCAM PE=2 SV=1              | Q5T4B2        | 0              | 6          | Not Common |
| Serine-threonine kinase receptor-associated protein OS=Homo sapiens GN=STRAP PE=1 SV=1  | Q9Y3F4        | 0              | 5          | Not Common |
| Protein Shroom3 OS=Homo sapiens GN=SHROOM3 PE=1 SV=2                                    | Q8TF72        | 1              | 4          | Not Common |
| Teneurin-3 OS=Homo sapiens GN=ODZ3 PE=2 SV=3                                            | Q9P273        | 0              | 4          | Not Common |
| Pumilio domain-containing protein C14orf21 OS=Homo sapiens GN=C14orf21 PE=1 SV=1        | Q86U38        | 0              | 4          | Not Common |
| Serpin B3 OS=Homo sapiens GN=SERPINB3 PE=1 SV=2                                         | P29508        | 0              | 4          | Not Common |
| Fibronectin OS=Homo sapiens GN=FN1 PE=1 SV=4                                            | P02751        | 0              | 4          | Not Common |
| Histone H2A type 1-B/E OS=Homo sapiens GN=HIST1H2AB PE=1 SV=2                           | P04908        | 1              | 3          | Not Common |
| Otoferlin OS=Homo sapiens GN=OTOF PE=1 SV=3                                             | Q9HC10        | 1              | 3          | Not Common |
| Homeobox protein Hox-A5 OS=Homo sapiens GN=HOXA5 PE=1 SV=2                              | P20719        | 1              | 3          | Not Common |
| Tubulin alpha-1A chain OS=Homo sapiens GN=TUBA1A PE=1 SV=1                              | Q71U36        | 1              | 3          | Not Common |
| Tubulin beta chain OS=Homo sapiens GN=TUBB PE=1 SV=2                                    | P07437        | 0              | 3          | Not Common |
| Transcription factor jun-B OS=Homo sapiens GN=JUNB PE=1 SV=1                            | P17275        | 0              | 3          | Not Common |
| Caspase 3, apoptosis-related cysteine peptidase, isoform CRA_b OS=Homo sapiens GN=CASP3 | A8MVM1        | 0              | 3          | Not Common |

| Protein peptides                                                                             | Accession No. | icPTPRD-D1521A | icPTPRD-WT |            |
|----------------------------------------------------------------------------------------------|---------------|----------------|------------|------------|
| Neuron navigator 3 OS=Homo sapiens GN=NAV3 PE=1 SV=3                                         | Q8IVL0        | 0              | 3          | Not Common |
| UDP-N-acetylglucosamine transferase subunit ALG13 homolog OS=Homo sapiens GN=ALG13 PE=1 SV=2 | Q9NP73        | 0              | 3          | Not Common |
| Cytospin-B OS=Homo sapiens GN=CYTSB PE=1 SV=1                                                | Q5M775        | 0              | 3          | Not Common |
| Zinc finger protein 510 OS=Homo sapiens GN=ZNF510 PE=2 SV=1                                  | Q9Y2H8        | 0              | 3          | Not Common |
| Spindlin-1 OS=Homo sapiens GN=SPIN1 PE=1 SV=3                                                | Q9Y657        | 9              | 2          | Not Common |
| PAX-9 protein (Fragment) OS=Homo sapiens GN=PAX-9                                            | O95616        | 1              | 2          | Not Common |
| 40S ribosomal protein S4, X isoform OS=Homo sapiens GN=RPS4X PE=1 SV=2                       | P62701        | 1              | 2          | Not Common |
| 40S ribosomal protein S17 OS=Homo sapiens GN=RPS17 PE=1 SV=2                                 | P08708        | 1              | 2          | Not Common |
| Alpha-centractin OS=Homo sapiens GN=ACTR1A PE=1 SV=1                                         | P61163        | 1              | 2          | Not Common |
| Gem-associated protein 8 OS=Homo sapiens GN=GEMIN8 PE=1 SV=1                                 | Q9NWX8        | 1              | 2          | Not Common |
| Codanin-1 OS=Homo sapiens GN=CDAN1 PE=1 SV=4                                                 | Q8IWY9        | 1              | 2          | Not Common |
| Rab9 effector protein with kelch motifs OS=Homo sapiens GN=RABEPK PE=1 SV=1                  | Q7Z6M1        | 1              | 2          | Not Common |
| Protein FAM102A OS=Homo sapiens GN=FAM102A PE=2 SV=2                                         | Q5T9C2        | 1              | 2          | Not Common |
| Isoleucyl-tRNA synthetase, cytoplasmic OS=Homo sapiens GN=IARS PE=1 SV=2                     | P41252        | 1              | 2          | Not Common |
| Putative HIN1-like protein OS=Homo sapiens GN=HIN1L PE=5 SV=1                                | Q7RTX8        | 1              | 2          | Not Common |
| Tubulin beta-2C chain OS=Homo sapiens GN=TUBB2C PE=1 SV=1                                    | P68371        | 0              | 2          | Not Common |
| Protein kinase C gamma type OS=Homo sapiens GN=PRKCG PE=1 SV=3                               | P05129        | 0              | 2          | Not Common |
| Coiled-coil domain-containing protein 33 OS=Homo sapiens GN=CCDC33 PE=1 SV=3                 | Q8N5R6        | 0              | 2          | Not Common |
| Endoplasmin OS=Homo sapiens GN=HSP90B1 PE=1 SV=1                                             | P14625        | 0              | 2          | Not Common |

| Protein peptides                                                                        | Accession No. | icPTPRD-D1521A | icPTPRD-WT |            |
|-----------------------------------------------------------------------------------------|---------------|----------------|------------|------------|
| THAP domain-containing protein 9 OS=Homo sapiens GN=THAP9 PE=2 SV=2                     | Q9H5L6        | 0              | 2          | Not Common |
| Actin-binding protein IPP OS=Homo sapiens GN=IPP PE=2 SV=1                              | Q9Y573        | 0              | 2          | Not Common |
| 6-phosphofructokinase, liver type OS=Homo sapiens GN=PFKL PE=1 SV=6                     | P17858        | 0              | 2          | Not Common |
| Midline-1 OS=Homo sapiens GN=MID1 PE=1 SV=1                                             | O15344        | 0              | 2          | Not Common |
| Methionyl-tRNA synthetase, cytoplasmic OS=Homo sapiens GN=MARS PE=1 SV=2                | P56192        | 0              | 2          | Not Common |
| Interleukin enhancer-binding factor 3 OS=Homo sapiens GN=ILF3 PE=1 SV=3                 | Q12906        | 0              | 2          | Not Common |
| Nuclear RNA export factor 2 OS=Homo sapiens GN=NXF2 PE=1 SV=1                           | Q9GZY0        | 0              | 2          | Not Common |
| Protein ALO17 OS=Homo sapiens GN=KIAA1618 PE=1 SV=2                                     | Q9HCF4        | 0              | 2          | Not Common |
| Eukaryotic translation initiation factor 3 subunit C OS=Homo sapiens GN=EIF3C PE=1 SV=1 | Q99613        | 0              | 2          | Not Common |
| Semenogelin-2 OS=Homo sapiens GN=SEMG2 PE=1 SV=1                                        | Q02383        | 0              | 2          | Not Common |
| Glycogenin-1 OS=Homo sapiens GN=GYG1 PE=1 SV=4                                          | P46976        | 0              | 2          | Not Common |
| Mitogen-activated protein kinase-binding protein 1 OS=Homo sapiens GN=MAPKBP1 PE=2 SV=4 | O60336        | 0              | 2          | Not Common |
| Protocadherin-17 OS=Homo sapiens GN=PCDH17 PE=2 SV=2                                    | O14917        | 0              | 2          | Not Common |
| Polyadenylate-binding protein 1 OS=Homo sapiens GN=PABPC1 PE=1 SV=2                     | P11940        | 0              | 2          | Not Common |
| Small nuclear ribonucleoprotein Sm D1 OS=Homo sapiens GN=SNRPD1 PE=1 SV=1               | P62314        | 8              | 1          | Not Common |
| U4/U6.U5 tri-snRNP-associated protein 1 OS=Homo sapiens GN=SART1 PE=1 SV=1              | O43290        | 6              | 1          | Not Common |
| Junction plakoglobin OS=Homo sapiens GN=JUP PE=1 SV=3                                   | P14923        | 5              | 1          | Not Common |
| Nucleophosmin OS=Homo sapiens GN=NPM1 PE=1 SV=2                                         | P06748        | 5              | 1          | Not Common |
| Plakophilin-1 OS=Homo sapiens GN=PKP1 PE=1 SV=2                                         | Q13835        | 4              | 1          | Not Common |

| Protein peptides                                                                                                                    | Accession No. | icPTPRD-D1521A | icPTPRD-WT |            |
|-------------------------------------------------------------------------------------------------------------------------------------|---------------|----------------|------------|------------|
| X-ray repair cross-complementing protein 5 OS=Homo sapiens GN=XRCC5 PE=1 SV=3                                                       | P13010        | 4              | 1          | Not Common |
| Putative small nuclear ribonucleoprotein polypeptide E-like protein 1 OS=Homo sapiens GN=SNRPEL1 PE=5 SV=1                          | Q5VYJ4        | 3              | 1          | Not Common |
| cDNA FLJ43335 fis, clone NT2RI3006673, highly similar to Receptor-type tyrosine-protein phosphatase F (EC 3.1.3.48) OS=Homo sapiens | B3KWM1        | 3              | 1          | Not Common |
| 40S ribosomal protein S13 OS=Homo sapiens GN=RPS13 PE=1 SV=2                                                                        | P62277        | 3              | 1          | Not Common |
| 40S ribosomal protein S8 OS=Homo sapiens GN=RPS8 PE=1 SV=2                                                                          | P62241        | 2              | 1          | Not Common |
| 40S ribosomal protein S23 OS=Homo sapiens GN=RPS23 PE=1 SV=3                                                                        | P62266        | 2              | 1          | Not Common |
| 40S ribosomal protein S3a OS=Homo sapiens GN=RPS3A PE=1 SV=2                                                                        | P61247        | 2              | 1          | Not Common |
| Rotatin OS=Homo sapiens GN=RTTN PE=1 SV=3                                                                                           | Q86VV8        | 2              | 1          | Not Common |
| Amiloride-sensitive cation channel 2, neuronal OS=Homo sapiens GN=ACCN2 PE=1 SV=3                                                   | P78348        | 2              | 1          | Not Common |
| Ankyrin repeat and FYVE domain-containing protein 1 OS=Homo sapiens GN=ANKFY1 PE=1 SV=2                                             | Q9P2R3        | 2              | 1          | Not Common |
| Enhancer of rudimentary homolog OS=Homo sapiens GN=ERH PE=1 SV=1                                                                    | P84090        | 2              | 1          | Not Common |
| DNA damage-binding protein 1 OS=Homo sapiens GN=DDB1 PE=1 SV=1                                                                      | Q16531        | 2              | 1          | Not Common |
| Histone H2B type 1-B OS=Homo sapiens GN=HIST1H2BB PE=1 SV=2                                                                         | P33778        | 2              | 1          | Not Common |
| 60S ribosomal protein L23 OS=Homo sapiens GN=RPL23 PE=1 SV=1                                                                        | P62829        | 2              | 1          | Not Common |
| Transitional endoplasmic reticulum ATPase OS=Homo sapiens GN=VCP PE=1 SV=4                                                          | P55072        | 2              | 1          | Not Common |
| 60S ribosomal protein L11 OS=Homo sapiens GN=RPL11 PE=1 SV=2                                                                        | P62913        | 2              | 1          | Not Common |
| Desmoplakin OS=Homo sapiens GN=DSP PE=1 SV=3                                                                                        | P15924        | 9              | 0          | Not Common |
| Survival of motor neuron protein-interacting protein 1 OS=Homo sapiens GN=SIP1 PE=1 SV=1                                            | O14893        | 9              | 0          | Not Common |
| Histone H4 OS=Homo sapiens GN=HIST1H4A PE=1 SV=2                                                                                    | P62805        | 8              | 0          | Not Common |

| Protein peptides                                                                                | Accession No. | icPTPRD-D1521A | icPTPRD-WT |            |
|-------------------------------------------------------------------------------------------------|---------------|----------------|------------|------------|
| Tubulin beta-2A chain OS=Homo sapiens GN=TUBB2A PE=1 SV=1                                       | Q13885        | 6              | 0          | Not Common |
| Small nuclear ribonucleoprotein Sm D3 OS=Homo sapiens GN=SNRPD3 PE=1 SV=1                       | P62318        | 6              | 0          | Not Common |
| Mitogen-activated protein kinase kinase kinase 7 OS=Homo sapiens GN=MAP3K7 PE=1 SV=1            | O43318        | 6              | 0          | Not Common |
| 40S ribosomal protein S18 OS=Homo sapiens GN=RPS18 PE=1 SV=3                                    | P62269        | 5              | 0          | Not Common |
| Thyroid hormone receptor-associated protein 3 OS=Homo sapiens GN=THRAP3 PE=1 SV=2               | Q9Y2W1        | 5              | 0          | Not Common |
| Tubulin beta-1 chain OS=Homo sapiens GN=TUBB1 PE=1 SV=1                                         | Q9H4B7        | 4              | 0          | Not Common |
| 40S ribosomal protein S14 OS=Homo sapiens GN=RPS14 PE=1 SV=3                                    | P62263        | 4              | 0          | Not Common |
| Heterogeneous nuclear ribonucleoproteins A2/B1 OS=Homo sapiens GN=HNRNPA2B1 PE=1 SV=2           | P22626        | 4              | 0          | Not Common |
| Hornerin OS=Homo sapiens GN=HRNR PE=1 SV=2                                                      | Q86YZ3        | 4              | 0          | Not Common |
| Rho-associated protein kinase 1 OS=Homo sapiens GN=ROCK1 PE=1 SV=1                              | Q13464        | 4              | 0          | Not Common |
| Probable methylcytosine dioxygenase TET2 OS=Homo sapiens GN=TET2 PE=1 SV=3                      | Q6N021        | 4              | 0          | Not Common |
| Dermcidin OS=Homo sapiens GN=DCD PE=1 SV=2                                                      | P81605        | 3              | 0          | Not Common |
| Small nuclear ribonucleoprotein-associated proteins B and B' OS=Homo sapiens GN=SNRPB PE=1 SV=2 | P14678        | 3              | 0          | Not Common |
| Filaggrin-2 OS=Homo sapiens GN=FLG2 PE=1 SV=1                                                   | Q5D862        | 3              | 0          | Not Common |
| Eukaryotic translation initiation factor 3 subunit B OS=Homo sapiens GN=EIF3B PE=1 SV=3         | P55884        | 3              | 0          | Not Common |
| Gem-associated protein 6 OS=Homo sapiens GN=GEMIN6 PE=1 SV=1                                    | Q8WXD5        | 3              | 0          | Not Common |
| 60S acidic ribosomal protein P2 OS=Homo sapiens GN=RPLP2 PE=1 SV=1                              | P05387        | 3              | 0          | Not Common |
| Glycogen debranching enzyme OS=Homo sapiens GN=AGL PE=1 SV=3                                    | P35573        | 3              | 0          | Not Common |
| Tryptophanyl-tRNA synthetase, cytoplasmic OS=Homo sapiens GN=WARS PE=1 SV=2                     | P23381        | 3              | 0          | Not Common |

| Protein peptides                                                                        | Accession No. | icPTPRD-D1521A | icPTPRD-WT |            |
|-----------------------------------------------------------------------------------------|---------------|----------------|------------|------------|
| Leucine-rich repeat-containing protein 42 OS=Homo sapiens GN=LRRC42 PE=1 SV=1           | Q9Y546        | 3              | 0          | Not Common |
| Desmoglein-1 OS=Homo sapiens GN=DSG1 PE=1 SV=2                                          | Q02413        | 3              | 0          | Not Common |
| 40S ribosomal protein S20 OS=Homo sapiens GN=RPS20 PE=1 SV=1                            | P60866        | 3              | 0          | Not Common |
| Zinc finger protein 40 OS=Homo sapiens GN=HIVEP1 PE=1 SV=3                              | P15822        | 3              | 0          | Not Common |
| 60S ribosomal protein L3 OS=Homo sapiens GN=RPL3 PE=1 SV=2                              | P39023        | 3              | 0          | Not Common |
| Probable ubiquitin carboxyl-terminal hydrolase FAF-X OS=Homo sapiens GN=USP9X PE=1 SV=2 | Q93008        | 3              | 0          | Not Common |
| 40S ribosomal protein S12 OS=Homo sapiens GN=RPS12 PE=1 SV=3                            | P25398        | 3              | 0          | Not Common |
| Zinc finger protein 202 OS=Homo sapiens GN=ZNF202 PE=1 SV=4                             | O95125        | 3              | 0          | Not Common |
| 60S ribosomal protein L17 OS=Homo sapiens GN=RPL17 PE=1 SV=3                            | P18621        | 3              | 0          | Not Common |
| Putative uncharacterized protein DKFZp686G04235 OS=Homo sapiens GN=DKFZp686G04235       | Q63HL4        | 3              | 0          | Not Common |
| 40S ribosomal protein S15a OS=Homo sapiens GN=RPS15A PE=1 SV=2                          | P62244        | 3              | 0          | Not Common |
| 60S ribosomal protein L22 OS=Homo sapiens GN=RPL22 PE=1 SV=2                            | P35268        | 2              | 0          | Not Common |
| Eukaryotic translation initiation factor 3 subunit G OS=Homo sapiens GN=EIF3G PE=1 SV=2 | O75821        | 2              | 0          | Not Common |
| Eukaryotic translation initiation factor 3 subunit F OS=Homo sapiens GN=EIF3F PE=1 SV=1 | O00303        | 2              | 0          | Not Common |
| 60S ribosomal protein L27 OS=Homo sapiens GN=RPL27 PE=1 SV=2                            | P61353        | 2              | 0          | Not Common |
| 60S ribosomal protein L12 OS=Homo sapiens GN=RPL12 PE=1 SV=1                            | P30050        | 2              | 0          | Not Common |
| DNA repair protein REV1 OS=Homo sapiens GN=REV1 PE=1 SV=1                               | Q9UBZ9        | 2              | 0          | Not Common |
| 26S protease regulatory subunit 7 OS=Homo sapiens GN=PSMC2 PE=1 SV=3                    | P35998        | 2              | 0          | Not Common |
| Bifunctional aminoacyl-tRNA synthetase OS=Homo sapiens GN=EPRS PE=1 SV=5                | P07814        | 2              | 0          | Not Common |

| Protein peptides                                                                                              | Accession No. | icPTPRD-D1521A | icPTPRD-WT |            |
|---------------------------------------------------------------------------------------------------------------|---------------|----------------|------------|------------|
| Elongation factor 1-alpha 1 OS=Homo sapiens GN=EEF1A1 PE=1 SV=1                                               | P68104        | 2              | 0          | Not Common |
| SCY1-like protein 2 OS=Homo sapiens GN=SCYL2 PE=1 SV=1                                                        | Q6P3W7        | 2              | 0          | Not Common |
| C-Myc-binding protein OS=Homo sapiens GN=MYCBP PE=1 SV=3                                                      | Q99417        | 2              | 0          | Not Common |
| Pulmonary surfactant-associated protein D OS=Homo sapiens GN=SFTPD PE=1 SV=2                                  | P35247        | 2              | 0          | Not Common |
| POTE ankyrin domain family member B OS=Homo sapiens GN=POTEB PE=2 SV=1                                        | Q6S5H4        | 2              | 0          | Not Common |
| Cell division protein kinase 18 OS=Homo sapiens GN=CDK18 PE=1 SV=3                                            | Q07002        | 2              | 0          | Not Common |
| 40S ribosomal protein S25 OS=Homo sapiens GN=RPS25 PE=1 SV=1                                                  | P62851        | 2              | 0          | Not Common |
| 26S proteasome non-ATPase regulatory subunit 14 OS=Homo sapiens GN=PSMD14 PE=1 SV=1                           | O00487        | 2              | 0          | Not Common |
| Importin-5 OS=Homo sapiens GN=IPO5 PE=1 SV=4                                                                  | O00410        | 2              | 0          | Not Common |
| Contactin-1 OS=Homo sapiens GN=CNTN1 PE=1 SV=1                                                                | Q12860        | 2              | 0          | Not Common |
| PHD and RING finger domain-containing protein 1 OS=Homo sapiens GN=PHRF1 PE=1 SV=3                            | Q9P1Y6        | 2              | 0          | Not Common |
| Phosphatidylinositol 3,4,5-trisphosphate-dependent Rac exchanger 2 protein OS=Homo sapiens GN=PREX2 PE=2 SV=1 | Q70Z35        | 2              | 0          | Not Common |
| Chromosome-associated kinesin KIF4A OS=Homo sapiens GN=KIF4A PE=1 SV=3                                        | O95239        | 2              | 0          | Not Common |
| 26S proteasome non-ATPase regulatory subunit 2 OS=Homo sapiens GN=PSMD2 PE=1 SV=3                             | Q13200        | 2              | 0          | Not Common |
| Cytoplasmic dynein 2 heavy chain 1 OS=Homo sapiens GN=DYNC2H1 PE=1 SV=4                                       | Q8NCM8        | 2              | 0          | Not Common |
| Protein tyrosine phosphatase, receptor type, F isoform 2 variant (Fragment) OS=Homo sapiens                   | Q59FI2        | 2              | 0          | Not Common |
| Cleavage stimulation factor subunit 3 OS=Homo sapiens GN=CSTF3 PE=1 SV=1                                      | Q12996        | 2              | 0          | Not Common |
| Vacuolar protein sorting-associated protein 8 homolog OS=Homo sapiens GN=VPS8 PE=1 SV=3                       | Q8N3P4        | 2              | 0          | Not Common |
| A disintegrin and metalloproteinase with thrombospondin motifs 15 OS=Homo sapiens GN=ADAMTS15 PE=2 SV=1       | Q8TE58        | 2              | 0          | Not Common |



| Protein peptides                                                                            | Accession No. | icPTPRD-D1521A | icPTPRD-WT |            |
|---------------------------------------------------------------------------------------------|---------------|----------------|------------|------------|
| Histone-lysine N-methyltransferase SETD2 OS=Homo sapiens GN=SETD2 PE=1 SV=3                 | Q9BYW2        | 2              | 0          | Not Common |
| Neuropilin-1 OS=Homo sapiens GN=NRP1 PE=1 SV=3                                              | O14786        | 2              | 0          | Not Common |
| UDP-N-acetylhexosamine pyrophosphorylase-like protein 1 OS=Homo sapiens GN=UAP1L1 PE=2 SV=2 | Q3KQV9        | 2              | 0          | Not Common |
| ATP-dependent RNA helicase DQX1 OS=Homo sapiens GN=DQX1 PE=2 SV=2                           | Q8TE96        | 2              | 0          | Not Common |
| Eukaryotic translation initiation factor 3 subunit I OS=Homo sapiens GN=EIF3I PE=1 SV=1     | Q13347        | 2              | 0          | Not Common |
| U1 small nuclear ribonucleoprotein A OS=Homo sapiens GN=SNRPA PE=1 SV=3                     | P09012        | 2              | 0          | Not Common |
| Bcl-2-associated transcription factor 1 OS=Homo sapiens GN=BCLAF1 PE=1 SV=2                 | Q9NYF8        | 2              | 0          | Not Common |
| Splicing factor 45 OS=Homo sapiens GN=RBM17 PE=1 SV=1                                       | Q96125        | 2              | 0          | Not Common |
| Prelamin-A/C OS=Homo sapiens GN=LMNA PE=1 SV=1                                              | P02545        | 2              | 0          | Not Common |
| Echinoderm microtubule-associated protein-like 6 OS=Homo sapiens GN=EML6 PE=2 SV=2          | Q6ZMW3        | 2              | 0          | Not Common |
| MAP kinase-activated protein kinase 5 OS=Homo sapiens GN=MAPKAPK5 PE=1 SV=2                 | Q8IW41        | 2              | 0          | Not Common |
| 60S ribosomal protein L26-like 1 OS=Homo sapiens GN=RPL26L1 PE=1 SV=1                       | Q9UNX3        | 2              | 0          | Not Common |
| CD2 antigen cytoplasmic tail-binding protein 2 OS=Homo sapiens GN=CD2BP2 PE=1 SV=1          | O95400        | 2              | 0          | Not Common |
| Protein KIAA1967 OS=Homo sapiens GN=KIAA1967 PE=1 SV=2                                      | Q8N163        | 2              | 0          | Not Common |
| 6-pyruvoyl tetrahydrobiopterin synthase OS=Homo sapiens GN=PTS PE=1 SV=1                    | Q03393        | 2              | 0          | Not Common |
| Spindlin-2A OS=Homo sapiens GN=SPIN2A PE=1 SV=3                                             | Q99865        | 2              | 0          | Not Common |
| 60S ribosomal protein L9 OS=Homo sapiens GN=RPL9 PE=1 SV=1                                  | P32969        | 2              | 0          | Not Common |
| Mitogen-activated protein kinase kinase kinase kinase 4 OS=Homo sapiens GN=MAP4K4 PE=1 SV=2 | O95819        | 2              | 0          | Not Common |
| Uncharacterized protein OS=Homo sapiens GN=ASB18                                            | C9JFL4        | 2              | 0          | Not Common |

| <b>Protein peptides</b>                                                                                                                                                               | <b>Accession No.</b> | <b>icPTPRD-D1521A</b> | <b>icPTPRD-WT</b> |            |
|---------------------------------------------------------------------------------------------------------------------------------------------------------------------------------------|----------------------|-----------------------|-------------------|------------|
| Transcription intermediary factor 1-beta OS=Homo sapiens GN=TRIM28 PE=1 SV=5                                                                                                          | Q13263               | 2                     | 0                 | Not Common |
| 40S ribosomal protein S19 OS=Homo sapiens GN=RPS19 PE=1 SV=2                                                                                                                          | P39019               | 2                     | 0                 | Not Common |
| Phosphatidylinositol 4-kinase alpha OS=Homo sapiens GN=PI4KA PE=1 SV=3                                                                                                                | P42356               | 2                     | 0                 | Not Common |
| Ig kappa chain V-II region Cum OS=Homo sapiens PE=1 SV=1                                                                                                                              | P01614               | 2                     | 0                 | Not Common |
| Receptor-type tyrosine-protein phosphatase delta OS=Homo sapiens GN=PTPRD PE=1 SV=2                                                                                                   | P23468               |                       |                   |            |
| icPTPRD-D1521A: intracellular PTPRD having two phosphatase domains and bearing D1521A mutation; icPTPRD-WT: intracellular PTPRD having two phosphatase domains; Control: Vector alone |                      |                       |                   |            |

**Supp. Table S8.** List of ClinVar accession numbers for the PTP variants. Variants can be accessed at <http://www.ncbi.nlm.nih.gov/clinvar/>

| HGVS name                | Phenotype descriptions       | Date last evaluated | Gene symbol | ClinVarAccession |
|--------------------------|------------------------------|---------------------|-------------|------------------|
| NM_133170.3:c.251C>T     | Cutaneous Malignant Melanoma | 2014-06-02          | PTPRT       | SCV000154775     |
| NM_133170.3:c.2551G>A    | Cutaneous Malignant Melanoma | 2014-06-02          | PTPRT       | SCV000154776     |
| NM_133170.3:c.4207C>T    | Cutaneous Malignant Melanoma | 2014-06-02          | PTPRT       | SCV000154777     |
| NM_133170.3:c.385G>A     | Cutaneous Malignant Melanoma | 2014-06-02          | PTPRT       | SCV000154778     |
| NM_133170.3:c.994G>T     | Cutaneous Malignant Melanoma | 2014-06-02          | PTPRT       | SCV000154779     |
| NM_133170.3:c.982C>T     | Cutaneous Malignant Melanoma | 2014-06-02          | PTPRT       | SCV000154780     |
| NM_133170.3:c.4201G>A    | Cutaneous Malignant Melanoma | 2014-06-02          | PTPRT       | SCV000154781     |
| NM_133170.3:c.1264C>T    | Cutaneous Malignant Melanoma | 2014-06-02          | PTPRT       | SCV000154782     |
| NM_133170.3:c.4351G>A    | Cutaneous Malignant Melanoma | 2014-06-02          | PTPRT       | SCV000154783     |
| NM_133170.3:c.1465C>T    | Cutaneous Malignant Melanoma | 2014-06-02          | PTPRT       | SCV000154784     |
| NM_133170.3:c.1651C>T    | Cutaneous Malignant Melanoma | 2014-06-02          | PTPRT       | SCV000154785     |
| NM_133170.3:c.4194-14G>A | Cutaneous Malignant Melanoma | 2014-06-02          | PTPRT       | SCV000154786     |
| NM_133170.3:c.1888G>A    | Cutaneous Malignant Melanoma | 2014-06-02          | PTPRT       | SCV000154787     |
| NM_133170.3:c.1958G>A    | Cutaneous Malignant Melanoma | 2014-06-02          | PTPRT       | SCV000154788     |
| NM_133170.3:c.1967C>T    | Cutaneous Malignant Melanoma | 2014-06-02          | PTPRT       | SCV000154789     |
| NM_133170.3:c.2731G>A    | Cutaneous Malignant Melanoma | 2014-06-02          | PTPRT       | SCV000154790     |

| <b>HGVS name</b>         | <b>Phenotype descriptions</b> | <b>Date last evaluated</b> | <b>Gene symbol</b> | <b>ClinVarAccession</b> |
|--------------------------|-------------------------------|----------------------------|--------------------|-------------------------|
| NM_133170.3:c.2782G>A    | Cutaneous Malignant Melanoma  | 2014-06-02                 | PTPRT              | SCV000154791            |
| NM_133170.3:c.2904+9C>T  | Cutaneous Malignant Melanoma  | 2014-06-02                 | PTPRT              | SCV000154792            |
| NM_133170.3:c.3082G>T    | Cutaneous Malignant Melanoma  | 2014-06-02                 | PTPRT              | SCV000154793            |
| NM_133170.3:c.3224C>T    | Cutaneous Malignant Melanoma  | 2014-06-02                 | PTPRT              | SCV000154794            |
| NM_133170.3:c.2770G>A    | Cutaneous Malignant Melanoma  | 2014-06-02                 | PTPRT              | SCV000154795            |
| NM_133170.3:c.3322G>A    | Cutaneous Malignant Melanoma  | 2014-06-02                 | PTPRT              | SCV000154796            |
| NM_133170.3:c.3530C>T    | Cutaneous Malignant Melanoma  | 2014-06-02                 | PTPRT              | SCV000154797            |
| NM_133170.3:c.3771+11C>T | Cutaneous Malignant Melanoma  | 2014-06-02                 | PTPRT              | SCV000154798            |
| NM_133170.3:c.4363G>A    | Cutaneous Malignant Melanoma  | 2014-06-02                 | PTPRT              | SCV000154799            |
| NM_002839.2:c.182G>A     | Cutaneous Malignant Melanoma  | 2014-06-02                 | PTPRD              | SCV000154800            |
| NM_002839.2:c.211-10C>T  | Cutaneous Malignant Melanoma  | 2014-06-02                 | PTPRD              | SCV000154801            |
| NM_002839.2:c.3124G>A    | Cutaneous Malignant Melanoma  | 2014-06-02                 | PTPRD              | SCV000154802            |
| NM_002839.2:c.1337G>A    | Cutaneous Malignant Melanoma  | 2014-06-02                 | PTPRD              | SCV000154803            |
| NM_002839.2:c.3122C>T    | Cutaneous Malignant Melanoma  | 2014-06-02                 | PTPRD              | SCV000154804            |
| NM_002839.2:c.3056-11C>T | Cutaneous Malignant Melanoma  | 2014-06-02                 | PTPRD              | SCV000154805            |
| NM_002839.2:c.3115G>A    | Cutaneous Malignant Melanoma  | 2014-06-02                 | PTPRD              | SCV000154806            |
| NM_002839.2:c.2508G>A    | Cutaneous Malignant Melanoma  | 2014-06-02                 | PTPRD              | SCV000154807            |
| NM_002839.2:c.2626G>T    | Cutaneous Malignant Melanoma  | 2014-06-02                 | PTPRD              | SCV000154808            |

| <b>HGVS name</b>                                   | <b>Phenotype descriptions</b> | <b>Date last evaluated</b> | <b>Gene symbol</b> | <b>ClinVarAccession</b> |
|----------------------------------------------------|-------------------------------|----------------------------|--------------------|-------------------------|
| NM_002839.2:c.3007G>A                              | Cutaneous Malignant Melanoma  | 2014-06-02                 | PTPRD              | SCV000154809            |
| NM_002839.2:c.3742G>A                              | Cutaneous Malignant Melanoma  | 2014-06-02                 | PTPRD              | SCV000154810            |
| NM_002839.2:c.5119G>A                              | Cutaneous Malignant Melanoma  | 2014-06-02                 | PTPRD              | SCV000154811            |
| NM_002839.2:c.4429C>T                              | Cutaneous Malignant Melanoma  | 2014-06-02                 | PTPRD              | SCV000154812            |
| NM_002839.2:c.4693G>A                              | Cutaneous Malignant Melanoma  | 2014-06-02                 | PTPRD              | SCV000154813            |
| NM_002839.2:c.5068C>T                              | Cutaneous Malignant Melanoma  | 2014-06-02                 | PTPRD              | SCV000154814            |
| NM_002839.2:c.5069C>T                              | Cutaneous Malignant Melanoma  | 2014-06-02                 | PTPRD              | SCV000154815            |
| NM_002839.2:c.4661+6_446+7insACAGTTCAGGAATGGTAAGTT | Cutaneous Malignant Melanoma  | 2014-06-02                 | PTPRD              | SCV000154816            |
| NM_001109754.1:c.1250G>A                           | Cutaneous Malignant Melanoma  | 2014-06-02                 | PTPRB              | SCV000154817            |
| NM_001109754.1:c.1781-5G>A                         | Cutaneous Malignant Melanoma  | 2014-06-02                 | PTPRB              | SCV000154818            |
| NM_001109754.1:c.2009G>A                           | Cutaneous Malignant Melanoma  | 2014-06-02                 | PTPRB              | SCV000154819            |
| NM_001109754.1:c.2009T>A                           | Cutaneous Malignant Melanoma  | 2014-06-02                 | PTPRB              | SCV000154820            |
| NM_001109754.1:c.2615C>T                           | Cutaneous Malignant Melanoma  | 2014-06-02                 | PTPRB              | SCV000154821            |
| NM_001109754.1: c.3374C>T                          | Cutaneous Malignant Melanoma  | 2014-06-02                 | PTPRB              | SCV000154822            |
| NM_001109754.1:c.5765C>T                           | Cutaneous Malignant Melanoma  | 2014-06-02                 | PTPRB              | SCV000154823            |
| NM_001109754.1:c.2900G>A                           | Cutaneous Malignant Melanoma  | 2014-06-02                 | PTPRB              | SCV000154824            |
| NM_001109754.1:c.3284C>T                           | Cutaneous Malignant Melanoma  | 2014-06-02                 | PTPRB              | SCV000154825            |
| NM_001109754.1:c.3843A>G                           | Cutaneous Malignant Melanoma  | 2014-06-02                 | PTPRB              | SCV000154826            |

| <b>HGVS name</b>            | <b>Phenotype descriptions</b> | <b>Date last evaluated</b> | <b>Gene symbol</b> | <b>ClinVarAccession</b> |
|-----------------------------|-------------------------------|----------------------------|--------------------|-------------------------|
| NM_001109754.1:c.4654A>G    | Cutaneous Malignant Melanoma  | 2014-06-02                 | PTPRB              | SCV000154827            |
| NM_001109754.1:c.4169-9T>A  | Cutaneous Malignant Melanoma  | 2014-06-02                 | PTPRB              | SCV000154828            |
| NM_001109754.1:c.4169-10T>C | Cutaneous Malignant Melanoma  | 2014-06-02                 | PTPRB              | SCV000154829            |
| NM_001109754.1:c.4674G>A    | Cutaneous Malignant Melanoma  | 2014-06-02                 | PTPRB              | SCV000154830            |
| NM_001109754.1:c.4715-5C>T  | Cutaneous Malignant Melanoma  | 2014-06-02                 | PTPRB              | SCV000154831            |
| NM_001109754.1:c.5848C>T    | Cutaneous Malignant Melanoma  | 2014-06-02                 | PTPRB              | SCV000154832            |
| NM_030667.1:c.839C>A        | Cutaneous Malignant Melanoma  | 2014-06-02                 | PTPRO              | SCV000154833            |
| NM_030667.1:c.1106-9T>A     | Cutaneous Malignant Melanoma  | 2014-06-02                 | PTPRO              | SCV000154834            |
| NM_030667.1:c.1110C>G       | Cutaneous Malignant Melanoma  | 2014-06-02                 | PTPRO              | SCV000154835            |
| NM_030667.1:c.1444G>A       | Cutaneous Malignant Melanoma  | 2014-06-02                 | PTPRO              | SCV000154836            |
| NM_030667.1:c.2302C>T       | Cutaneous Malignant Melanoma  | 2014-06-02                 | PTPRO              | SCV000154837            |
| NM_030667.1:c.2321C>T       | Cutaneous Malignant Melanoma  | 2014-06-02                 | PTPRO              | SCV000154838            |
| NM_030667.1:c.2560G>A       | Cutaneous Malignant Melanoma  | 2014-06-02                 | PTPRO              | SCV000154839            |
| NM_030667.1:c.2814T>G       | Cutaneous Malignant Melanoma  | 2014-06-02                 | PTPRO              | SCV000154840            |
| NM_030667.1:c.3223G>A       | Cutaneous Malignant Melanoma  | 2014-06-02                 | PTPRO              | SCV000154841            |
| NM_030667.1:c.3364C>T       | Cutaneous Malignant Melanoma  | 2014-06-02                 | PTPRO              | SCV000154842            |
| NM_030667.1:c.3506C>T       | Cutaneous Malignant Melanoma  | 2014-06-02                 | PTPRO              | SCV000154843            |
| NM_002847.3:c.113-7C>T      | Cutaneous Malignant Melanoma  | 2014-06-02                 | PTPRN2             | SCV000154844            |

| <b>HGVS name</b>        | <b>Phenotype descriptions</b> | <b>Date last evaluated</b> | <b>Gene symbol</b> | <b>ClinVarAccession</b> |
|-------------------------|-------------------------------|----------------------------|--------------------|-------------------------|
| NM_002847.3:c.202G>A    | Cutaneous Malignant Melanoma  | 2014-06-02                 | PTPRN2             | SCV000154845            |
| NM_002847.3:c.2149G>A   | Cutaneous Malignant Melanoma  | 2014-06-02                 | PTPRN2             | SCV000154846            |
| NM_002847.3:c.536G>A    | Cutaneous Malignant Melanoma  | 2014-06-02                 | PTPRN2             | SCV000154847            |
| NM_002847.3:c.428G>A    | Cutaneous Malignant Melanoma  | 2014-06-02                 | PTPRN2             | SCV000154848            |
| NM_002847.3:c.770C>T    | Cutaneous Malignant Melanoma  | 2014-06-02                 | PTPRN2             | SCV000154849            |
| NM_002847.3:c.1063G>A   | Cutaneous Malignant Melanoma  | 2014-06-02                 | PTPRN2             | SCV000154850            |
| NM_002847.3:c.1269G>A   | Cutaneous Malignant Melanoma  | 2014-06-02                 | PTPRN2             | SCV000154851            |
| NM_002847.3:c.2345-7C>T | Cutaneous Malignant Melanoma  | 2014-06-02                 | PTPRN2             | SCV000154852            |
| NM_002847.3:c.2276C>T   | Cutaneous Malignant Melanoma  | 2014-06-02                 | PTPRN2             | SCV000154853            |
| NM_002847.3:c.2419-7C>T | Cutaneous Malignant Melanoma  | 2014-06-02                 | PTPRN2             | SCV000154854            |
| NM_002850.3:c.421C>T    | Cutaneous Malignant Melanoma  | 2014-06-02                 | PTPRS              | SCV000154855            |
| NM_002850.3:c.470C>T    | Cutaneous Malignant Melanoma  | 2014-06-02                 | PTPRS              | SCV000154856            |
| NM_002850.3:c.379+1G>T  | Cutaneous Malignant Melanoma  | 2014-06-02                 | PTPRS              | SCV000154857            |
| NM_002850.3:c.543T>A    | Cutaneous Malignant Melanoma  | 2014-06-02                 | PTPRS              | SCV000154858            |
| NM_002850.3:c.860C>T    | Cutaneous Malignant Melanoma  | 2014-06-02                 | PTPRS              | SCV000154859            |
| NM_002850.3:c.1532C>T   | Cutaneous Malignant Melanoma  | 2014-06-02                 | PTPRS              | SCV000154860            |
| NM_002850.3:c.4165G>A   | Cutaneous Malignant Melanoma  | 2014-06-02                 | PTPRS              | SCV000154861            |
| NM_002850.3:c.4531G>A   | Cutaneous Malignant Melanoma  | 2014-06-02                 | PTPRS              | SCV000154862            |

| <b>HGVS name</b>        | <b>Phenotype descriptions</b> | <b>Date last evaluated</b> | <b>Gene symbol</b> | <b>ClinVarAccession</b> |
|-------------------------|-------------------------------|----------------------------|--------------------|-------------------------|
| NM_002850.3:c.5425C>T   | Cutaneous Malignant Melanoma  | 2014-06-02                 | PTPRS              | SCV000154863            |
| NM_080683.2:c.1196-6C>T | Cutaneous Malignant Melanoma  | 2014-06-02                 | PTPN13             | SCV000154864            |
| NM_080683.2:c.3224-7C>T | Cutaneous Malignant Melanoma  | 2014-06-02                 | PTPN13             | SCV000154865            |
| NM_080683.2:c.3314-7T>G | Cutaneous Malignant Melanoma  | 2014-06-02                 | PTPN13             | SCV000154866            |
| NM_080683.2:c.4549C>T   | Cutaneous Malignant Melanoma  | 2014-06-02                 | PTPN13             | SCV000154867            |
| NM_080683.2: c.4559A>G  | Cutaneous Malignant Melanoma  | 2014-06-02                 | PTPN13             | SCV000154868            |
| NM_080683.2: c.4566A>G  | Cutaneous Malignant Melanoma  | 2014-06-02                 | PTPN13             | SCV000154869            |
| NM_080683.2:c.5246C>T   | Cutaneous Malignant Melanoma  | 2014-06-02                 | PTPN13             | SCV000154870            |
| NM_080683.2:c.7385A>T   | Cutaneous Malignant Melanoma  | 2014-06-02                 | PTPN13             | SCV000154871            |
| NM_002838.4:c.1659+1G>A | Cutaneous Malignant Melanoma  | 2014-06-02                 | PTPRC              | SCV000154872            |
| NM_002838.4:c.1694G>T   | Cutaneous Malignant Melanoma  | 2014-06-02                 | PTPRC              | SCV000154873            |
| NM_002838.4:c.1721-9G>T | Cutaneous Malignant Melanoma  | 2014-06-02                 | PTPRC              | SCV000154874            |
| NM_002838.4:c.1972C>T   | Cutaneous Malignant Melanoma  | 2014-06-02                 | PTPRC              | SCV000154875            |
| NM_002838.4:c.2689C>T   | Cutaneous Malignant Melanoma  | 2014-06-02                 | PTPRC              | SCV000154876            |
| NM_002838.4:c.3406G>A   | Cutaneous Malignant Melanoma  | 2014-06-02                 | PTPRC              | SCV000154877            |
| NM_002838.4:c.3458C>T   | Cutaneous Malignant Melanoma  | 2014-06-02                 | PTPRC              | SCV000154878            |
| NM_002846.2:c.193G>A    | Cutaneous Malignant Melanoma  | 2014-06-02                 | PTPRN              | SCV000154879            |
| NM_002846.2:c.361C>T    | Cutaneous Malignant Melanoma  | 2014-06-02                 | PTPRN              | SCV000154880            |



| <b>HGVS name</b>         | <b>Phenotype descriptions</b> | <b>Date last evaluated</b> | <b>Gene symbol</b> | <b>ClinVarAccession</b> |
|--------------------------|-------------------------------|----------------------------|--------------------|-------------------------|
| NM_002846.2:c.365G>C     | Cutaneous Malignant Melanoma  | 2014-06-02                 | PTPRN              | SCV000154881            |
| NM_002846.2:c.427C>T     | Cutaneous Malignant Melanoma  | 2014-06-02                 | PTPRN              | SCV000154882            |
| NM_002846.2:c.604G>A     | Cutaneous Malignant Melanoma  | 2014-06-02                 | PTPRN              | SCV000154883            |
| NM_002846.2:c.785G>A     | Cutaneous Malignant Melanoma  | 2014-06-02                 | PTPRN              | SCV000154884            |
| NM_002846.2:c.1286C>T    | Cutaneous Malignant Melanoma  | 2014-06-02                 | PTPRN              | SCV000154885            |
| NM_002846.2:c.2192G>A    | Cutaneous Malignant Melanoma  | 2014-06-02                 | PTPRN              | SCV000154886            |
| NM_002842.2:c.431G>A     | Cutaneous Malignant Melanoma  | 2014-06-02                 | PTPRH              | SCV000154887            |
| NM_002842.2:c.1690-9C>T  | Cutaneous Malignant Melanoma  | 2014-06-02                 | PTPRH              | SCV000154888            |
| NM_002842.2:c.458G>A     | Cutaneous Malignant Melanoma  | 2014-06-02                 | PTPRH              | SCV000154889            |
| NM_002842.2:c.1094C>T    | Cutaneous Malignant Melanoma  | 2014-06-02                 | PTPRH              | SCV000154890            |
| NM_002842.2:c.2384+11G>A | Cutaneous Malignant Melanoma  | 2014-06-02                 | PTPRH              | SCV000154891            |
| NM_002842.2:c.2969C>T    | Cutaneous Malignant Melanoma  | 2014-06-02                 | PTPRH              | SCV000154892            |
| NM_002842.2:c.3220C>T    | Cutaneous Malignant Melanoma  | 2014-06-02                 | PTPRH              | SCV000154893            |
| NM_153050.2:c.835C>T     | Cutaneous Malignant Melanoma  | 2014-06-02                 | MTMR3              | SCV000154894            |
| NM_153050.2:c.881C>T     | Cutaneous Malignant Melanoma  | 2014-06-02                 | MTMR4              | SCV000154895            |
| NM_153050.2:c.1330C>T    | Cutaneous Malignant Melanoma  | 2014-06-02                 | MTMR5              | SCV000154896            |
| NM_153050.2:c.1548C>A    | Cutaneous Malignant Melanoma  | 2014-06-02                 | MTMR6              | SCV000154897            |
| NM_153050.2:c.3455C>T    | Cutaneous Malignant Melanoma  | 2014-06-02                 | MTMR7              | SCV000154898            |

| <b>HGVS name</b>            | <b>Phenotype descriptions</b> | <b>Date last evaluated</b> | <b>Gene symbol</b> | <b>ClinVarAccession</b> |
|-----------------------------|-------------------------------|----------------------------|--------------------|-------------------------|
| NM_022648.4:c.666-7C>T      | Cutaneous Malignant Melanoma  | 2014-06-02                 | TNS1               | SCV000154899            |
| NM_022648.4:c.4523C>T       | Cutaneous Malignant Melanoma  | 2014-06-02                 | TNS1               | SCV000154900            |
| NM_022648.4:c.1729C>T       | Cutaneous Malignant Melanoma  | 2014-06-02                 | TNS1               | SCV000154901            |
| NM_022648.4:c.2362C>T       | Cutaneous Malignant Melanoma  | 2014-06-02                 | TNS1               | SCV000154902            |
| NM_022648.4:c.4330+9C>T     | Cutaneous Malignant Melanoma  | 2014-06-02                 | TNS1               | SCV000154903            |
| NM_022648.4:c.2919-2921delG | Cutaneous Malignant Melanoma  | 2014-06-02                 | TNS1               | SCV000154904            |
| NM_022648.4:c.4498G>A       | Cutaneous Malignant Melanoma  | 2014-06-02                 | TNS1               | SCV000154905            |
| NM_032865.5:c.206G>T        | Cutaneous Malignant Melanoma  | 2014-06-02                 | TNS1               | SCV000154906            |
| NM_032865.5:c.653C>T        | Cutaneous Malignant Melanoma  | 2014-06-02                 | TNS1               | SCV000154907            |
| NM_032865.5:c.683C>T        | Cutaneous Malignant Melanoma  | 2014-06-02                 | TNS1               | SCV000154908            |
| NM_032865.5:c.1055C>T       | Cutaneous Malignant Melanoma  | 2014-06-02                 | TNS1               | SCV000154909            |
| NM_032865.5:c.1289-10C>T    | Cutaneous Malignant Melanoma  | 2014-06-02                 | TNS1               | SCV000154910            |
| NM_032865.5:c.1940C>T       | Cutaneous Malignant Melanoma  | 2014-06-02                 | TNS1               | SCV000154911            |
| NM_032865.5:c.2141G>A       | Cutaneous Malignant Melanoma  | 2014-06-02                 | TNS1               | SCV000154912            |
| NM_032865.5:c.2140-2142delG | Cutaneous Malignant Melanoma  | 2014-06-02                 | TNS1               | SCV000154913            |
| NM_006504.4:c.11G>A         | Cutaneous Malignant Melanoma  | 2014-06-02                 | PTPRE              | SCV000154914            |
| NM_006504.4:c.32G>A         | Cutaneous Malignant Melanoma  | 2014-06-02                 | PTPRE              | SCV000154915            |
| NM_006504.4:c.598G>A        | Cutaneous Malignant Melanoma  | 2014-06-02                 | PTPRE              | SCV000154916            |

| <b>HGVS name</b>                            | <b>Phenotype descriptions</b> | <b>Date last evaluated</b> | <b>Gene symbol</b> | <b>ClinVarAccession</b> |
|---------------------------------------------|-------------------------------|----------------------------|--------------------|-------------------------|
| NM_006504.4:c.1599+12C>T                    | Cutaneous Malignant Melanoma  | 2014-06-02                 | PTPRE              | SCV000154917            |
| NM_002843.3:c.3874+3G>T                     | Cutaneous Malignant Melanoma  | 2014-06-02                 | PTPRJ              | SCV000154918            |
| NM_002843.3:c.1257-1275delGTCATCCCCGGACTCCG | Cutaneous Malignant Melanoma  | 2014-06-02                 | PTPRJ              | SCV000154919            |
| NM_002843.3:c.1561C>A                       | Cutaneous Malignant Melanoma  | 2014-06-02                 | PTPRJ              | SCV000154920            |
| NM_002843.3:c.1562C>T                       | Cutaneous Malignant Melanoma  | 2014-06-02                 | PTPRJ              | SCV000154921            |
| NM_002843.3:c.2155C>T                       | Cutaneous Malignant Melanoma  | 2014-06-02                 | PTPRJ              | SCV000154922            |
| NM_001040446.1:c.331G>T                     | Cutaneous Malignant Melanoma  | 2014-06-02                 | MTMR12             | SCV000154923            |
| NM_001040446.1:c.583+9G>T                   | Cutaneous Malignant Melanoma  | 2014-06-02                 | MTMR12             | SCV000154924            |
| NM_001040446.1:c.2038G>A                    | Cutaneous Malignant Melanoma  | 2014-06-02                 | MTMR12             | SCV000154925            |
| NM_006906.1:c.13G>A                         | Cutaneous Malignant Melanoma  | 2014-06-02                 | PTPN5              | SCV000154926            |
| NM_006906.1:c.508C>G                        | Cutaneous Malignant Melanoma  | 2014-06-02                 | PTPN5              | SCV000154927            |
| NM_006906.1:c.916G>A                        | Cutaneous Malignant Melanoma  | 2014-06-02                 | PTPN5              | SCV000154928            |
| NM_006906.1:c.1080+1G>A                     | Cutaneous Malignant Melanoma  | 2014-06-02                 | PTPN5              | SCV000154929            |
| NM_002835.3:c.938G>G                        | Cutaneous Malignant Melanoma  | 2014-06-02                 | PTPN12             | SCV000154930            |
| NM_002835.3:c.1448G>T                       | Cutaneous Malignant Melanoma  | 2014-06-02                 | PTPN12             | SCV000154931            |
| NM_002835.3:c.2314G>T                       | Cutaneous Malignant Melanoma  | 2014-06-02                 | PTPN12             | SCV000154932            |
| NM_007039.3:c.829G>A                        | Cutaneous Malignant Melanoma  | 2014-06-02                 | PTPN21             | SCV000154933            |
| NM_007039.3:c.1756G>C                       | Cutaneous Malignant Melanoma  | 2014-06-02                 | PTPN21             | SCV000154934            |

| <b>HGVS name</b>      | <b>Phenotype descriptions</b> | <b>Date last evaluated</b> | <b>Gene symbol</b> | <b>ClinVarAccession</b> |
|-----------------------|-------------------------------|----------------------------|--------------------|-------------------------|
| NM_007039.3:c.2224G>A | Cutaneous Malignant Melanoma  | 2014-06-02                 | PTPN21             | SCV000154935            |
| NM_004685.3:c.1116G>C | Cutaneous Malignant Melanoma  | 2014-06-02                 | MTMR6              | SCV000154936            |
| NM_004685.3:c.1808G>T | Cutaneous Malignant Melanoma  | 2014-06-02                 | MTMR6              | SCV000154937            |
| NM_017677.2:c.310G>A  | Cutaneous Malignant Melanoma  | 2014-06-02                 | MTMR8              | SCV000154938            |
| NM_017677.2:c.2102G>T | Cutaneous Malignant Melanoma  | 2014-06-02                 | MTMR8              | SCV000154939            |
| NM_015466.2:c.3773G>T | Cutaneous Malignant Melanoma  | 2014-06-02                 | PTPN23             | SCV000154940            |
| NM_015466.2:c.4015G>T | Cutaneous Malignant Melanoma  | 2014-06-02                 | PTPN23             | SCV000154941            |
| NM_003463.3:c.25G>T   | Cutaneous Malignant Melanoma  | 2014-06-02                 | PTP4A1             | SCV000154942            |
|                       |                               |                            |                    |                         |
